# Supplementary material for: Comparative Seeds Storage Transcriptome Analysis of Astronium fraxinifolium Schott, a Threatened Tree Species from Brazil
Source: Int J Mol Sci. 2022 Nov 10;23(22):13852. doi: 10.3390/ijms232213852 (PMC9696909; doi:10.3390/ijms232213852)
Supplement: Supplementary file 1 [file ijms-23-13852-s001.zip]

Archive with 5 entries (5 files):
- Supplemental table S1.xlsx
- Supplemental table S2.pdf
- Supplemental table S3.pdf
- Supplemental table S4.pdf
- Supplemental table S5.pdf
