# Supplementary material for: Comparative Seeds Storage Transcriptome Analysis of Astronium fraxinifolium Schott, a Threatened Tree Species from Brazil
Source: Int J Mol Sci. 2022 Nov 10;23(22):13852. doi: 10.3390/ijms232213852 (PMC9696909; doi:10.3390/ijms232213852)
Supplement: Supplementary file 1 [file ijms-23-13852-s001.zip › Supplemental table S1.xlsx]

## Sheet: GOIAS control vs aged-seeds
Table S1. DEGs list obtained in this study in comparison between aged and non-aged seeds for A. fraxinifolium
id	log2FoldChange	pval	padj	#gene_id	sprot_Top_BLASTX_hit	prot_id	prot_coords	Pfam	eggnog	Kegg	gene_ontology_blast	gene_ontology_pfam
c17137_g1_i1	2.03828	3.35878541169349e-06	0.00203645743192062	c17137_g1	.	.	.	.	.	.	.	.
c27884_g1_i3	2.05265	4.06408764208534e-07	0.000351866435167225	c27884_g1	KPYA_RICCO^KPYA_RICCO^Q:3288-2578,H:85-321^86.498%ID^E:9.25e-138^RecName: Full=Pyruvate kinase isozyme A, chloroplastic;^Eukaryota; Viridiplantae; Streptophyta; Embryophyta; Tracheophyta; Spermatophyta; Magnoliophyta; eudicotyledons; Gunneridae; Pentapetalae; rosids; fabids; Malpighiales; Euphorbiaceae; Acalyphoideae; Acalypheae; Ricinus`KPYA_RICCO^KPYA_RICCO^Q:1516-737,H:324-583^78.077%ID^E:6.61…	Gene.47352::c27884_g1_i3::g.47352::m.47352	3597-2566[-]	PF00224.18^PK^Pyruvate kinase, barrel domain^123-336^E:3.8e-43	.	KEGG:rcu:RCOM_0910580`KO:K00873	GO:0009507^cellular_component^chloroplast`GO:0005524^molecular_function^ATP binding`GO:0016301^molecular_function^kinase activity`GO:0000287^molecular_function^magnesium ion binding`GO:0030955^molecular_function^potassium ion binding`GO:0004743^molecular_function^pyruvate kinase activity	GO:0000287^molecular_function^magnesium ion binding`GO:0004743^molecular_function^pyruvate kinase activity`GO:0030955^molecular_function^potassium ion binding`GO:0006096^biological_process^glycolytic process
c31189_g4_i2	2.07757	1.54596094343878e-05	0.0074022632724485	c31189_g4	4CLL1_ARATH^4CLL1_ARATH^Q:3130-2837,H:446-509^46.939%ID^E:1.25e-14^RecName: Full=4-coumarate--CoA ligase-like 1;^Eukaryota; Viridiplantae; Streptophyta; Embryophyta; Tracheophyta; Spermatophyta; Magnoliophyta; eudicotyledons; Gunneridae; Pentapetalae; rosids; malvids; Brassicales; Brassicaceae; Camelineae; Arabidopsis`4CLL1_ARATH^4CLL1_ARATH^Q:2831-2763,H:508-530^60.87%ID^E:1.25e-14^RecName: Full…	.	.	.	COG0318^Amp-dependent synthetase and ligase	KEGG:ath:AT1G62940`KO:K01904	GO:0005737^cellular_component^cytoplasm`GO:0005783^cellular_component^endoplasmic reticulum`GO:0005524^molecular_function^ATP binding`GO:0004467^molecular_function^long-chain fatty acid-CoA ligase activity`GO:0031956^molecular_function^medium-chain fatty acid-CoA ligase activity`GO:0046949^biological_process^fatty-acyl-CoA biosynthetic process`GO:0001676^biological_process^long-chain fatty acid m…	.
c31227_g1_i8	2.1743	3.84864639610973e-05	0.0149377046069614	c31227_g1	KCBP_ARATH^KCBP_ARATH^Q:3996-319,H:33-1259^77.362%ID^E:0^RecName: Full=Kinesin-like calmodulin-binding protein;^Eukaryota; Viridiplantae; Streptophyta; Embryophyta; Tracheophyta; Spermatophyta; Magnoliophyta; eudicotyledons; Gunneridae; Pentapetalae; rosids; malvids; Brassicales; Brassicaceae; Camelineae; Arabidopsis	Gene.82851::c31227_g1_i8::g.82851::m.82851	4110-301[-]	PF00784.14^MyTH4^MyTH4 domain^168-276^E:7.2e-25`PF09379.7^FERM_N^FERM N-terminal domain^287-360^E:1.9e-09`PF00373.15^FERM_M^FERM central domain^390-504^E:1.3e-15`PF16796.2^Microtub_bd^Microtubule binding^873-1032^E:4.4e-47`PF00225.20^Kinesin^Kinesin motor domain^899-1214^E:1.7e-105	COG5059^Kinesin family member	.	GO:0005871^cellular_component^kinesin complex`GO:0043531^molecular_function^ADP binding`GO:0005524^molecular_function^ATP binding`GO:0016887^molecular_function^ATPase activity`GO:0005509^molecular_function^calcium ion binding`GO:0005516^molecular_function^calmodulin binding`GO:0008017^molecular_function^microtubule binding`GO:0003777^molecular_function^microtubule motor activity`GO:0016491^molecu…	GO:0005856^cellular_component^cytoskeleton`GO:0008017^molecular_function^microtubule binding`GO:0003777^molecular_function^microtubule motor activity`GO:0005524^molecular_function^ATP binding`GO:0007018^biological_process^microtubule-based movement
c25062_g1_i1	2.35015	0.000157327685318429	0.0476944929107637	c25062_g1	.	Gene.26849::c25062_g1_i1::g.26849::m.26849	510-866[+]	PF07498.9^Rho_N^Rho termination factor, N-terminal domain^85-113^E:2.2e-07	ENOG410YIZQ^Sap-like protein	KEGG:osa:4331846	GO:0003677^molecular_function^DNA binding`GO:0006353^biological_process^DNA-templated transcription, termination`GO:0040008^biological_process^regulation of growth	GO:0006353^biological_process^DNA-templated transcription, termination
c30555_g2_i9	2.46289	1.22399659539614e-06	0.000909504723271002	c30555_g2	MED23_ARATH^MED23_ARATH^Q:5478-943,H:83-1605^73.769%ID^E:0^RecName: Full=Mediator of RNA polymerase II transcription subunit 23;^Eukaryota; Viridiplantae; Streptophyta; Embryophyta; Tracheophyta; Spermatophyta; Magnoliophyta; eudicotyledons; Gunneridae; Pentapetalae; rosids; malvids; Brassicales; Brassicaceae; Camelineae; Arabidopsis`MED23_ARATH^MED23_ARATH^Q:5777-5529,H:1-83^71.084%ID^E:1e-23^Re…	Gene.75216::c30555_g2_i9::g.75216::m.75216	5292-916[-]	PF11573.5^Med23^Mediator complex subunit 23^341-1071^E:9.3e-33	ENOG410ZH5R^Mediator complex subunit 23	KEGG:ath:AT1G23230`KO:K15166	GO:0016592^cellular_component^mediator complex`GO:0006355^biological_process^regulation of transcription, DNA-templated`GO:0006351^biological_process^transcription, DNA-templated	.
c31005_g3_i16	2.58529	2.71064150959257e-06	0.00174684649636423	c31005_g3	RDR5_ARATH^RDR5_ARATH^Q:3879-2218,H:158-696^55.694%ID^E:0^RecName: Full=Probable RNA-dependent RNA polymerase 5;^Eukaryota; Viridiplantae; Streptophyta; Embryophyta; Tracheophyta; Spermatophyta; Magnoliophyta; eudicotyledons; Gunneridae; Pentapetalae; rosids; malvids; Brassicales; Brassicaceae; Camelineae; Arabidopsis`RDR5_ARATH^RDR5_ARATH^Q:1217-333,H:685-975^48.322%ID^E:2.85e-60^RecName: Full=P…	Gene.80505::c31005_g3_i16::g.80505::m.80505	3897-2125[-]	PF05183.9^RdRP^RNA dependent RNA polymerase^63-561^E:4.8e-95	ENOG410XQMQ^rna polymerase	KEGG:ath:AT2G19930`KO:K11699	GO:0003723^molecular_function^RNA binding`GO:0003968^molecular_function^RNA-directed RNA polymerase activity`GO:0031047^biological_process^gene silencing by RNA	GO:0003968^molecular_function^RNA-directed RNA polymerase activity
c25078_g1_i1	2.64233	3.29775854627045e-06	0.00201135790001278	c25078_g1	THIC_ARATH^THIC_ARATH^Q:141-2078,H:3-644^87.172%ID^E:0^RecName: Full=Phosphomethylpyrimidine synthase, chloroplastic;^Eukaryota; Viridiplantae; Streptophyta; Embryophyta; Tracheophyta; Spermatophyta; Magnoliophyta; eudicotyledons; Gunneridae; Pentapetalae; rosids; malvids; Brassicales; Brassicaceae; Camelineae; Arabidopsis	Gene.26966::c25078_g1_i1::g.26966::m.26966	138-2081[+]	PF13667.3^ThiC-associated^ThiC-associated domain^95-159^E:1.1e-06`PF01964.15^ThiC_Rad_SAM^Radical SAM ThiC family^167-587^E:2.4e-197	COG0422^thiamine diphosphate biosynthetic process	KEGG:ath:AT2G29630`KO:K03147	GO:0009507^cellular_component^chloroplast`GO:0009570^cellular_component^chloroplast stroma`GO:0009536^cellular_component^plastid`GO:0051539^molecular_function^4 iron, 4 sulfur cluster binding`GO:0080041^molecular_function^ADP-ribose pyrophosphohydrolase activity`GO:0051536^molecular_function^iron-sulfur cluster binding`GO:0016829^molecular_function^lyase activity`GO:0046872^molecular_function^met…	GO:0051536^molecular_function^iron-sulfur cluster binding`GO:0009228^biological_process^thiamine biosynthetic process
c26154_g1_i8	2.8821	1.79984951594623e-06	0.00122948920333964	c26154_g1	NACK1_ARATH^NACK1_ARATH^Q:1058-3850,H:27-967^40.413%ID^E:0^RecName: Full=Kinesin-like protein NACK1;^Eukaryota; Viridiplantae; Streptophyta; Embryophyta; Tracheophyta; Spermatophyta; Magnoliophyta; eudicotyledons; Gunneridae; Pentapetalae; rosids; malvids; Brassicales; Brassicaceae; Camelineae; Arabidopsis	Gene.33438::c26154_g1_i8::g.33438::m.33438	1001-3871[+]	PF16796.2^Microtub_bd^Microtubule binding^25-161^E:4.2e-21`PF00225.20^Kinesin^Kinesin motor domain^30-346^E:4.5e-94`PF11995.5^DUF3490^Domain of unknown function (DUF3490)^780-938^E:5e-73	COG5059^Kinesin family member	KEGG:ath:AT1G18370`KO:K11498	GO:0005871^cellular_component^kinesin complex`GO:0005874^cellular_component^microtubule`GO:0005634^cellular_component^nucleus`GO:0009524^cellular_component^phragmoplast`GO:0005524^molecular_function^ATP binding`GO:0016887^molecular_function^ATPase activity`GO:0003777^molecular_function^microtubule motor activity`GO:0000911^biological_process^cytokinesis by cell plate formation`GO:0009558^biologic…	GO:0008017^molecular_function^microtubule binding`GO:0003777^molecular_function^microtubule motor activity`GO:0005524^molecular_function^ATP binding`GO:0007018^biological_process^microtubule-based movement
c27188_g2_i2	3.00949	0.000138705407741738	0.0430684494232271	c27188_g2	AP3BA_ARATH^AP3BA_ARATH^Q:2389-290,H:303-981^52.833%ID^E:0^RecName: Full=AP3-complex subunit beta-A;^Eukaryota; Viridiplantae; Streptophyta; Embryophyta; Tracheophyta; Spermatophyta; Magnoliophyta; eudicotyledons; Gunneridae; Pentapetalae; rosids; malvids; Brassicales; Brassicaceae; Camelineae; Arabidopsis`AP3BA_ARATH^AP3BA_ARATH^Q:4184-3558,H:55-265^68.396%ID^E:4.52e-71^RecName: Full=AP3-complex…	Gene.41355::c27188_g2_i2::g.41355::m.41355	2251-269[-]	PF01602.17^Adaptin_N^Adaptin N terminal region^3-164^E:3.8e-20`PF14796.3^AP3B1_C^Clathrin-adaptor complex-3 beta-1 subunit C-terminal^357-482^E:4.3e-08	COG5096^The coatomer is a cytosolic protein complex that binds to dilysine motifs and reversibly associates with Golgi non- clathrin-coated vesicles, which further mediate biosynthetic protein transport from the ER, via the Golgi up to the trans Golgi network. Coatomer complex is required for budding from Golgi membranes, and is essential for the retrograde Golgi-to-ER transport of dilysine-tagge…	KEGG:ath:AT3G55480`KO:K12397	GO:0030659^cellular_component^cytoplasmic vesicle membrane`GO:0005794^cellular_component^Golgi apparatus`GO:0030117^cellular_component^membrane coat`GO:0006886^biological_process^intracellular protein transport`GO:0016192^biological_process^vesicle-mediated transport	GO:0006886^biological_process^intracellular protein transport`GO:0016192^biological_process^vesicle-mediated transport`GO:0030117^cellular_component^membrane coat
c27942_g1_i2	3.41221	5.14381365223611e-05	0.0193064472413929	c27942_g1	G3BP_SCHPO^G3BP_SCHPO^Q:3347-3012,H:17-130^39.316%ID^E:3.1e-14^RecName: Full=Putative G3BP-like protein;^Eukaryota; Fungi; Dikarya; Ascomycota; Taphrinomycotina; Schizosaccharomycetes; Schizosaccharomycetales; Schizosaccharomycetaceae; Schizosaccharomyces	Gene.47832::c27942_g1_i2::g.47832::m.47832	3383-2163[-]	PF02136.17^NTF2^Nuclear transport factor 2 (NTF2) domain^14-128^E:3.4e-25`PF00076.19^RRM_1^RNA recognition motif. (a.k.a. RRM, RBD, or RNP domain)^320-377^E:3.3e-10	.	KEGG:spo:SPBP8B7.11	GO:0005737^cellular_component^cytoplasm`GO:0005829^cellular_component^cytosol`GO:0000166^molecular_function^nucleotide binding`GO:0003723^molecular_function^RNA binding`GO:0051028^biological_process^mRNA transport`GO:0016579^biological_process^protein deubiquitination`GO:0060628^biological_process^regulation of ER to Golgi vesicle-mediated transport	GO:0006810^biological_process^transport`GO:0005622^cellular_component^intracellular`GO:0003676^molecular_function^nucleic acid binding
c20301_g1_i2	3.45706	5.26549490791739e-09	7.70763144620947e-06	c20301_g1	MTP12_ARATH^MTP12_ARATH^Q:1813-1403,H:10-146^90.511%ID^E:6.07e-76^RecName: Full=Metal tolerance protein 12;^Eukaryota; Viridiplantae; Streptophyta; Embryophyta; Tracheophyta; Spermatophyta; Magnoliophyta; eudicotyledons; Gunneridae; Pentapetalae; rosids; malvids; Brassicales; Brassicaceae; Camelineae; Arabidopsis`MTP12_ARATH^MTP12_ARATH^Q:796-377,H:159-298^77.143%ID^E:6.08e-53^RecName: Full=Metal…	Gene.8784::c20301_g1_i2::g.8784::m.8784	3184-371[-]	PF01545.18^Cation_efflux^Cation efflux family^477-856^E:6.1e-35	COG1230^cation diffusion facilitator family transporter	KEGG:ath:AT2G04620`KO:K14692	GO:0016021^cellular_component^integral component of membrane`GO:0005774^cellular_component^vacuolar membrane`GO:0008324^molecular_function^cation transmembrane transporter activity	GO:0008324^molecular_function^cation transmembrane transporter activity`GO:0006812^biological_process^cation transport`GO:0055085^biological_process^transmembrane transport`GO:0016021^cellular_component^integral component of membrane
c26724_g1_i8	3.47353	5.85895895066862e-05	0.0212887974411068	c26724_g1	TBL13_ARATH^TBL13_ARATH^Q:1454-624,H:134-411^79.496%ID^E:1.31e-155^RecName: Full=Protein trichome birefringence-like 13;^Eukaryota; Viridiplantae; Streptophyta; Embryophyta; Tracheophyta; Spermatophyta; Magnoliophyta; eudicotyledons; Gunneridae; Pentapetalae; rosids; malvids; Brassicales; Brassicaceae; Camelineae; Arabidopsis`TBL13_ARATH^TBL13_ARATH^Q:1723-1460,H:50-133^54.545%ID^E:4.76e-21^RecNa…	Gene.37722::c26724_g1_i8::g.37722::m.37722	1424-615[-]	PF13839.3^PC-Esterase^GDSL/SGNH-like Acyl-Esterase family found in Pmr5 and Cas1p^2-260^E:1.3e-57	ENOG4110DHZ^Pfam:DUF231	KEGG:ath:AT2G14530	GO:0005794^cellular_component^Golgi apparatus`GO:0016021^cellular_component^integral component of membrane`GO:0016413^molecular_function^O-acetyltransferase activity`GO:0071554^biological_process^cell wall organization or biogenesis	.
c31031_g1_i1	3.54922	6.07481114867815e-06	0.00340142950360905	c31031_g1	PP148_ARATH^PP148_ARATH^Q:4605-2563,H:11-692^55.718%ID^E:0^RecName: Full=Pentatricopeptide repeat-containing protein At2g04860;^Eukaryota; Viridiplantae; Streptophyta; Embryophyta; Tracheophyta; Spermatophyta; Magnoliophyta; eudicotyledons; Gunneridae; Pentapetalae; rosids; malvids; Brassicales; Brassicaceae; Camelineae; Arabidopsis	Gene.80737::c31031_g1_i1::g.80737::m.80737	4626-2515[-]	PF13041.3^PPR_2^PPR repeat family^112-154^E:5e-08`PF01535.17^PPR^PPR repeat^114-144^E:4.1e-06`PF01535.17^PPR^PPR repeat^187-213^E:1.4`PF13041.3^PPR_2^PPR repeat family^213-257^E:1.5e-08`PF01535.17^PPR^PPR repeat^215-245^E:2e-07`PF01535.17^PPR^PPR repeat^282-308^E:0.54`PF01535.17^PPR^PPR repeat^310-338^E:0.0078`PF01535.17^PPR^PPR repeat^383-408^E:1.4`PF13041.3^PPR_2^PPR repeat family^412-456^E:1.1…	ENOG410Z7Z7^Pentatricopeptide repeat-containing protein	KEGG:ath:AT2G04860	.	.
c29287_g1_i16	3.67524	3.22370891408986e-06	0.00200929673045343	c29287_g1	DEGP2_ARATH^DEGP2_ARATH^Q:1641-2612,H:284-607^83.642%ID^E:0^RecName: Full=Protease Do-like 2, chloroplastic;^Eukaryota; Viridiplantae; Streptophyta; Embryophyta; Tracheophyta; Spermatophyta; Magnoliophyta; eudicotyledons; Gunneridae; Pentapetalae; rosids; malvids; Brassicales; Brassicaceae; Camelineae; Arabidopsis`DEGP2_ARATH^DEGP2_ARATH^Q:166-717,H:1-181^58.378%ID^E:2.83e-89^RecName: Full=Protea…	Gene.61622::c29287_g1_i16::g.61622::m.61622	2037-2615[+]	.	COG0265^Serine protease	.	GO:0009507^cellular_component^chloroplast`GO:0009941^cellular_component^chloroplast envelope`GO:0009570^cellular_component^chloroplast stroma`GO:0009533^cellular_component^chloroplast stromal thylakoid`GO:0009535^cellular_component^chloroplast thylakoid membrane`GO:0004252^molecular_function^serine-type endopeptidase activity`GO:0009658^biological_process^chloroplast organization`GO:0010206^biolo…	.
c28909_g1_i4	3.71272	5.11640099168624e-06	0.00289644830947029	c28909_g1	SSY4_ARATH^SSY4_ARATH^Q:1068-2105,H:662-1015^33.708%ID^E:1.12e-92^RecName: Full=Probable starch synthase 4, chloroplastic/amyloplastic;^Eukaryota; Viridiplantae; Streptophyta; Embryophyta; Tracheophyta; Spermatophyta; Magnoliophyta; eudicotyledons; Gunneridae; Pentapetalae; rosids; malvids; Brassicales; Brassicaceae; Camelineae; Arabidopsis`SSY4_ARATH^SSY4_ARATH^Q:548-1072,H:479-653^41.714%ID^E:1…	Gene.57528::c28909_g1_i4::g.57528::m.57528	885-2162[+]	PF08323.8^Glyco_transf_5^Starch synthase catalytic domain^58-181^E:9.7e-12	COG0297^starch synthase activity	KEGG:ath:AT4G18240	GO:0009501^cellular_component^amyloplast`GO:0009507^cellular_component^chloroplast`GO:0033201^molecular_function^alpha-1,4-glucan synthase activity`GO:0004373^molecular_function^glycogen (starch) synthase activity`GO:0009011^molecular_function^starch synthase activity`GO:0019252^biological_process^starch biosynthetic process`GO:0005982^biological_process^starch metabolic process	.
c28964_g5_i2	3.8282	1.02251108253553e-05	0.00523863102915427	c28964_g5	MORC6_ARATH^MORC6_ARATH^Q:1650-394,H:252-651^52.113%ID^E:8.95e-140^RecName: Full=Protein MICRORCHIDIA 6 {ECO:0000303|PubMed:22555433};^Eukaryota; Viridiplantae; Streptophyta; Embryophyta; Tracheophyta; Spermatophyta; Magnoliophyta; eudicotyledons; Gunneridae; Pentapetalae; rosids; malvids; Brassicales; Brassicaceae; Camelineae; Arabidopsis`MORC6_ARATH^MORC6_ARATH^Q:1870-1670,H:201-266^64.179%ID^E…	Gene.58107::c28964_g5_i2::g.58107::m.58107	1569-367[-]	.	.	KEGG:ath:AT1G19100	GO:0009941^cellular_component^chloroplast envelope`GO:0005634^cellular_component^nucleus`GO:0009506^cellular_component^plasmodesma`GO:0005524^molecular_function^ATP binding`GO:0016887^molecular_function^ATPase activity`GO:0003677^molecular_function^DNA binding`GO:0004519^molecular_function^endonuclease activity`GO:0042803^molecular_function^protein homodimerization activity`GO:0003723^molecular_f…	.
c27303_g1_i4	3.96426	8.27655609863574e-05	0.0276242865538374	c27303_g1	SNL4_ARATH^SNL4_ARATH^Q:4783-485,H:9-1325^57.645%ID^E:0^RecName: Full=Paired amphipathic helix protein Sin3-like 4;^Eukaryota; Viridiplantae; Streptophyta; Embryophyta; Tracheophyta; Spermatophyta; Magnoliophyta; eudicotyledons; Gunneridae; Pentapetalae; rosids; malvids; Brassicales; Brassicaceae; Camelineae; Arabidopsis	Gene.42388::c27303_g1_i4::g.42388::m.42388	4915-1271[-]	PF02671.18^PAH^Paired amphipathic helix repeat^67-111^E:2.4e-16`PF02671.18^PAH^Paired amphipathic helix repeat^153-197^E:1.2e-18`PF02671.18^PAH^Paired amphipathic helix repeat^371-414^E:8e-12`PF08295.9^Sin3_corepress^Sin3 family co-repressor^510-602^E:9.8e-37`PF16879.2^Sin3a_C^C-terminal domain of Sin3a protein^1166-1196^E:8.8e-07	COG5602^Paired AMPhipathic helix protein	KEGG:ath:AT1G70060`KO:K11644	GO:0005634^cellular_component^nucleus`GO:0006355^biological_process^regulation of transcription, DNA-templated`GO:0006351^biological_process^transcription, DNA-templated	GO:0006355^biological_process^regulation of transcription, DNA-templated
c28578_g1_i1	4.53903	9.5348412180121e-12	2.68882619626653e-08	c28578_g1	MHK_ARATH^MHK_ARATH^Q:565-1866,H:9-443^73.165%ID^E:0^RecName: Full=Serine/threonine-protein kinase MHK;^Eukaryota; Viridiplantae; Streptophyta; Embryophyta; Tracheophyta; Spermatophyta; Magnoliophyta; eudicotyledons; Gunneridae; Pentapetalae; rosids; malvids; Brassicales; Brassicaceae; Camelineae; Arabidopsis	Gene.53819::c28578_g1_i1::g.53819::m.53819	565-1869[+]	PF00069.22^Pkinase^Protein kinase domain^4-283^E:7.4e-76`PF07714.14^Pkinase_Tyr^Protein tyrosine kinase^5-196^E:5.4e-35	ENOG410XPBB^Male germ cell-associated kinase	.	GO:0005524^molecular_function^ATP binding`GO:0004693^molecular_function^cyclin-dependent protein serine/threonine kinase activity	GO:0004672^molecular_function^protein kinase activity`GO:0005524^molecular_function^ATP binding`GO:0006468^biological_process^protein phosphorylation
c26266_g2_i1	4.79829	7.15983209258111e-07	0.000573155746248763	c26266_g2	ADLO1_ARATH^ADLO1_ARATH^Q:2306-1806,H:604-772^32.164%ID^E:2e-06^RecName: Full=Protein ARABIDILLO 1;^Eukaryota; Viridiplantae; Streptophyta; Embryophyta; Tracheophyta; Spermatophyta; Magnoliophyta; eudicotyledons; Gunneridae; Pentapetalae; rosids; malvids; Brassicales; Brassicaceae; Camelineae; Arabidopsis	Gene.34218::c26266_g2_i1::g.34218::m.34218	2519-975[-]	PF05804.9^KAP^Kinesin-associated protein (KAP)^141-251^E:1.7e-07	ENOG410XU9Y^U-box domain-containing protein 4-like	KEGG:ath:AT2G23140	GO:0016874^molecular_function^ligase activity`GO:0004842^molecular_function^ubiquitin-protein transferase activity	.
c26635_g1_i1	4.8925	3.80630520143059e-12	1.11433391077082e-08	c26635_g1	TPPC8_HUMAN^TPPC8_HUMAN^Q:5152-4061,H:337-724^32.821%ID^E:1.81e-48^RecName: Full=Trafficking protein particle complex subunit 8;^Eukaryota; Metazoa; Chordata; Craniata; Vertebrata; Euteleostomi; Mammalia; Eutheria; Euarchontoglires; Primates; Haplorrhini; Catarrhini; Hominidae; Homo`TPPC8_HUMAN^TPPC8_HUMAN^Q:5899-5183,H:10-248^26.587%ID^E:1.38e-14^RecName: Full=Trafficking protein particle comple…	Gene.36928::c26635_g1_i1::g.36928::m.36928	5929-3962[-]	PF12739.4^TRAPPC-Trs85^ER-Golgi trafficking TRAPP I complex 85 kDa subunit^165-519^E:5.2e-90	ENOG410XPCJ^trafficking protein particle complex	KEGG:hsa:22878	GO:0031410^cellular_component^cytoplasmic vesicle`GO:0000407^cellular_component^pre-autophagosomal structure`GO:1990072^cellular_component^TRAPPIII protein complex`GO:0000045^biological_process^autophagosome assembly`GO:0032258^biological_process^CVT pathway`GO:0006888^biological_process^ER to Golgi vesicle-mediated transport`GO:0044804^biological_process^nucleophagy`GO:0030242^biological_process…	.
c24351_g1_i3	5.12776	1.00244251133226e-05	0.00516162182744581	c24351_g1	NDA1_ARATH^NDA1_ARATH^Q:154-1356,H:61-460^73.317%ID^E:0^RecName: Full=Internal alternative NAD(P)H-ubiquinone oxidoreductase A1, mitochondrial;^Eukaryota; Viridiplantae; Streptophyta; Embryophyta; Tracheophyta; Spermatophyta; Magnoliophyta; eudicotyledons; Gunneridae; Pentapetalae; rosids; malvids; Brassicales; Brassicaceae; Camelineae; Arabidopsis`NDA1_ARATH^NDA1_ARATH^Q:1419-1586,H:455-510^73.2…	Gene.23021::c24351_g1_i3::g.23021::m.23021	1-1383[+]	PF07992.11^Pyr_redox_2^Pyridine nucleotide-disulphide oxidoreductase^66-397^E:4.9e-59`PF00070.24^Pyr_redox^Pyridine nucleotide-disulphide oxidoreductase^234-306^E:6.1e-06	COG1252^Nadh dehydrogenase	KEGG:ath:AT2G29990`KO:K17871	GO:0031304^cellular_component^intrinsic component of mitochondrial inner membrane`GO:0005759^cellular_component^mitochondrial matrix`GO:0005739^cellular_component^mitochondrion`GO:0005777^cellular_component^peroxisome`GO:0003959^molecular_function^NADPH dehydrogenase activity`GO:0055114^biological_process^oxidation-reduction process	GO:0016491^molecular_function^oxidoreductase activity`GO:0055114^biological_process^oxidation-reduction process
c20908_g1_i5	5.24046	2.1445203661381e-17	1.09870211918353e-13	c20908_g1	ING1_ARATH^ING1_ARATH^Q:1191-481,H:1-234^71.13%ID^E:1.11e-99^RecName: Full=PHD finger protein ING1;^Eukaryota; Viridiplantae; Streptophyta; Embryophyta; Tracheophyta; Spermatophyta; Magnoliophyta; eudicotyledons; Gunneridae; Pentapetalae; rosids; malvids; Brassicales; Brassicaceae; Camelineae; Arabidopsis	Gene.10366::c20908_g1_i5::g.10366::m.10366	1191-478[-]	PF12998.4^ING^Inhibitor of growth proteins N-terminal histone-binding^3-111^E:1.9e-20	COG5034^Inhibitor of growth family member	KEGG:ath:AT3G24010`KO:K11346	GO:0005634^cellular_component^nucleus`GO:0035064^molecular_function^methylated histone binding`GO:0008270^molecular_function^zinc ion binding`GO:0016568^biological_process^chromatin modification`GO:0040008^biological_process^regulation of growth`GO:0006355^biological_process^regulation of transcription, DNA-templated`GO:0006351^biological_process^transcription, DNA-templated	.
c30712_g3_i1	6.80489	3.74067889940395e-13	1.23642711002041e-09	c30712_g3	PT106_ARATH^PT106_ARATH^Q:577-1809,H:1-409^69.762%ID^E:2.92e-164^RecName: Full=Probable sugar phosphate/phosphate translocator At1g06470;^Eukaryota; Viridiplantae; Streptophyta; Embryophyta; Tracheophyta; Spermatophyta; Magnoliophyta; eudicotyledons; Gunneridae; Pentapetalae; rosids; malvids; Brassicales; Brassicaceae; Camelineae; Arabidopsis	Gene.77074::c30712_g3_i1::g.77074::m.77074	361-1827[+]	PF03151.13^TPT^Triose-phosphate Transporter family^147-446^E:1.5e-29`PF00892.17^EamA^EamA-like transporter family^174-289^E:1.4e-07`PF08449.8^UAA^UAA transporter family^188-445^E:1.3e-09`PF00892.17^EamA^EamA-like transporter family^298-446^E:3.4e-07	COG0697^membrane	KEGG:ath:AT1G06470`KO:K15280	GO:0016021^cellular_component^integral component of membrane`GO:0008643^biological_process^carbohydrate transport	GO:0016020^cellular_component^membrane`GO:0016021^cellular_component^integral component of membrane`GO:0055085^biological_process^transmembrane transport
c29094_g5_i2	Inf	1.60305925765239e-30	1.6425906989461e-26	c29094_g5	CMTA4_ARATH^CMTA4_ARATH^Q:3228-2329,H:681-990^71.704%ID^E:4.35e-95^RecName: Full=Calmodulin-binding transcription activator 4;^Eukaryota; Viridiplantae; Streptophyta; Embryophyta; Tracheophyta; Spermatophyta; Magnoliophyta; eudicotyledons; Gunneridae; Pentapetalae; rosids; malvids; Brassicales; Brassicaceae; Camelineae; Arabidopsis	Gene.59542::c29094_g5_i2::g.59542::m.59542	3228-2254[-]	PF00023.27^Ank^Ankyrin repeat^1-37^E:0.00019`PF13606.3^Ank_3^Ankyrin repeat^1-25^E:0.00062`PF13637.3^Ank_4^Ankyrin repeats (many copies)^2-43^E:3e-05`PF00612.24^IQ^IQ calmodulin-binding motif^168-185^E:0.0086`PF00612.24^IQ^IQ calmodulin-binding motif^190-209^E:1.5e-05	ENOG410XS5M^Transcription activator	KEGG:ath:AT1G67310	GO:0005829^cellular_component^cytosol`GO:0005634^cellular_component^nucleus`GO:0003677^molecular_function^DNA binding`GO:0006355^biological_process^regulation of transcription, DNA-templated`GO:0006351^biological_process^transcription, DNA-templated	GO:0005515^molecular_function^protein binding
c30207_g1_i5	Inf	5.22263205218372e-28	4.45951846549215e-24	c30207_g1	BCHC2_ARATH^BCHC2_ARATH^Q:507-9203,H:26-2988^70.698%ID^E:0^RecName: Full=BEACH domain-containing protein C2 {ECO:0000303|PubMed:25618824};^Eukaryota; Viridiplantae; Streptophyta; Embryophyta; Tracheophyta; Spermatophyta; Magnoliophyta; eudicotyledons; Gunneridae; Pentapetalae; rosids; malvids; Brassicales; Brassicaceae; Camelineae; Arabidopsis	Gene.71293::c30207_g1_i5::g.71293::m.71293	348-9206[+]	PF15787.2^DUF4704^Domain of unknown function (DUF4704)^669-949^E:2.1e-47`PF14844.3^PH_BEACH^PH domain associated with Beige/BEACH^2117-2210^E:2.7e-26`PF02138.15^Beach^Beige/BEACH domain^2238-2513^E:1.7e-120`PF00400.29^WD40^WD domain, G-beta repeat^2670-2700^E:5.2e-07	ENOG410XNQC^beige BEACH domain containing protein	KEGG:ath:AT2G45540	.	GO:0005515^molecular_function^protein binding
c30056_g7_i2	Inf	1.05147926758173e-18	6.33769850776643e-15	c30056_g7	FAB1B_ARATH^FAB1B_ARATH^Q:5601-187,H:1-1786^59.15%ID^E:0^RecName: Full=1-phosphatidylinositol-3-phosphate 5-kinase FAB1B;^Eukaryota; Viridiplantae; Streptophyta; Embryophyta; Tracheophyta; Spermatophyta; Magnoliophyta; eudicotyledons; Gunneridae; Pentapetalae; rosids; malvids; Brassicales; Brassicaceae; Camelineae; Arabidopsis	Gene.69606::c30056_g7_i2::g.69606::m.69606	5601-160[-]	PF01363.18^FYVE^FYVE zinc finger^33-102^E:3.7e-16`PF00118.21^Cpn60_TCP1^TCP-1/cpn60 chaperonin family^411-656^E:1.8e-33`PF01504.15^PIP5K^Phosphatidylinositol-4-phosphate 5-Kinase^1553-1775^E:1.5e-46	COG0459^Prevents misfolding and promotes the refolding and proper assembly of unfolded polypeptides generated under stress conditions (By similarity)`COG5253^phosphatidylinositol-4-phosphate 5-kinase	KEGG:ath:AT3G14270`KO:K00921	GO:0005768^cellular_component^endosome`GO:0010008^cellular_component^endosome membrane`GO:0005739^cellular_component^mitochondrion`GO:0000285^molecular_function^1-phosphatidylinositol-3-phosphate 5-kinase activity`GO:0005524^molecular_function^ATP binding`GO:0046872^molecular_function^metal ion binding`GO:0010256^biological_process^endomembrane system organization`GO:0046854^biological_process^ph…	GO:0046872^molecular_function^metal ion binding`GO:0005524^molecular_function^ATP binding`GO:0016307^molecular_function^phosphatidylinositol phosphate kinase activity`GO:0046488^biological_process^phosphatidylinositol metabolic process
c31008_g2_i9	Inf	4.12664073792884e-16	1.92200168114826e-12	c31008_g2	TPS1_ARATH^TPS1_ARATH^Q:351-1700,H:1-463^80.645%ID^E:0^RecName: Full=Alpha,alpha-trehalose-phosphate synthase [UDP-forming] 1;^Eukaryota; Viridiplantae; Streptophyta; Embryophyta; Tracheophyta; Spermatophyta; Magnoliophyta; eudicotyledons; Gunneridae; Pentapetalae; rosids; malvids; Brassicales; Brassicaceae; Camelineae; Arabidopsis	Gene.80531::c31008_g2_i9::g.80531::m.80531	78-1706[+]	PF00982.18^Glyco_transf_20^Glycosyltransferase family 20^171-540^E:6.1e-136	COG0380^synthase`COG1877^trehalose biosynthetic process	KEGG:ath:AT1G78580`KO:K16055	GO:0005618^cellular_component^cell wall`GO:0005576^cellular_component^extracellular region`GO:0005773^cellular_component^vacuole`GO:0003825^molecular_function^alpha,alpha-trehalose-phosphate synthase (UDP-forming) activity`GO:0051301^biological_process^cell division`GO:0009793^biological_process^embryo development ending in seed dormancy`GO:0009832^biological_process^plant-type cell wall biogenes…	GO:0003824^molecular_function^catalytic activity`GO:0005992^biological_process^trehalose biosynthetic process
c28521_g2_i1	Inf	1.59240016249399e-15	6.27564904038881e-12	c28521_g2	METL1_ARATH^METL1_ARATH^Q:4812-2176,H:1-775^53.237%ID^E:0^RecName: Full=Methyltransferase-like protein 1;^Eukaryota; Viridiplantae; Streptophyta; Embryophyta; Tracheophyta; Spermatophyta; Magnoliophyta; eudicotyledons; Gunneridae; Pentapetalae; rosids; malvids; Brassicales; Brassicaceae; Camelineae; Arabidopsis	Gene.53216::c28521_g2_i1::g.53216::m.53216	5109-1597[-]	PF05063.11^MT-A70^MT-A70^842-1018^E:9.8e-52	ENOG410XQ0H^Methyltransferase like 14	KEGG:ath:AT4G09980	GO:0008168^molecular_function^methyltransferase activity`GO:0003676^molecular_function^nucleic acid binding`GO:0006139^biological_process^nucleobase-containing compound metabolic process	GO:0008168^molecular_function^methyltransferase activity`GO:0006139^biological_process^nucleobase-containing compound metabolic process
c29544_g1_i2	Inf	3.28931558961436e-14	1.16221728001871e-10	c29544_g1	H2AX_CICAR^H2AX_CICAR^Q:3385-3170,H:68-139^95.833%ID^E:5.65e-38^RecName: Full=Histone H2AX;^Eukaryota; Viridiplantae; Streptophyta; Embryophyta; Tracheophyta; Spermatophyta; Magnoliophyta; eudicotyledons; Gunneridae; Pentapetalae; rosids; fabids; Fabales; Fabaceae; Papilionoideae; Cicereae; Cicer	Gene.64208::c29544_g1_i2::g.64208::m.64208	1265-252[-]	.	.	.	.	.
c29650_g1_i7	Inf	4.55391478778481e-13	1.45819197701612e-09	c29650_g1	Y4424_ARATH^Y4424_ARATH^Q:975-2426,H:1-480^79.012%ID^E:0^RecName: Full=DUF21 domain-containing protein At4g14240;^Eukaryota; Viridiplantae; Streptophyta; Embryophyta; Tracheophyta; Spermatophyta; Magnoliophyta; eudicotyledons; Gunneridae; Pentapetalae; rosids; malvids; Brassicales; Brassicaceae; Camelineae; Arabidopsis	Gene.65446::c29650_g1_i7::g.65446::m.65446	975-2459[+]	PF01595.17^DUF21^Domain of unknown function DUF21^41-210^E:1.1e-36	COG1253^CBS Domain protein	KEGG:ath:AT4G14240`KO:K16302	GO:0016021^cellular_component^integral component of membrane	.
c29581_g2_i2	Inf	3.39248007195538e-12	1.05337534258479e-08	c29581_g2	CL16A_DICDI^CL16A_DICDI^Q:268-555,H:12-107^27.083%ID^E:4.74e-09^RecName: Full=Protein CLEC16A homolog {ECO:0000305};^Eukaryota; Amoebozoa; Mycetozoa; Dictyosteliida; Dictyostelium	Gene.64691::c29581_g2_i2::g.64691::m.64691	4842-5477[+]	.	.	.	.	.
c26344_g1_i3	Inf	3.77166883583583e-12	1.11433391077082e-08	c26344_g1	SF3B3_MOUSE^SF3B3_MOUSE^Q:4770-1162,H:9-1214^58.47%ID^E:0^RecName: Full=Splicing factor 3B subunit 3;^Eukaryota; Metazoa; Chordata; Craniata; Vertebrata; Euteleostomi; Mammalia; Eutheria; Euarchontoglires; Glires; Rodentia; Sciurognathi; Muroidea; Muridae; Murinae; Mus; Mus	Gene.34771::c26344_g1_i3::g.34771::m.34771	4905-1153[-]	PF10433.6^MMS1_N^Mono-functional DNA-alkylating methyl methanesulfonate N-term^112-626^E:1.6e-170`PF03178.12^CPSF_A^CPSF A subunit region^897-1216^E:2.1e-99	ENOG410XPFQ^Splicing factor 3b subunit	KEGG:mmu:101943`KO:K12830	GO:0071013^cellular_component^catalytic step 2 spliceosome`GO:0005730^cellular_component^nucleolus`GO:0005634^cellular_component^nucleus`GO:0005689^cellular_component^U12-type spliceosomal complex`GO:0003723^molecular_function^RNA binding`GO:0000398^biological_process^mRNA splicing, via spliceosome`GO:0042177^biological_process^negative regulation of protein catabolic process	GO:0003676^molecular_function^nucleic acid binding`GO:0005634^cellular_component^nucleus
c29857_g1_i3	Inf	1.66712773400643e-11	4.16643683884642e-08	c29857_g1	CCC1_ARATH^CCC1_ARATH^Q:175-3114,H:1-975^82.085%ID^E:0^RecName: Full=Cation-chloride cotransporter 1;^Eukaryota; Viridiplantae; Streptophyta; Embryophyta; Tracheophyta; Spermatophyta; Magnoliophyta; eudicotyledons; Gunneridae; Pentapetalae; rosids; malvids; Brassicales; Brassicaceae; Camelineae; Arabidopsis	Gene.67484::c29857_g1_i3::g.67484::m.67484	175-3117[+]	PF00324.18^AA_permease^Amino acid permease^138-614^E:1.7e-57`PF13520.3^AA_permease_2^Amino acid permease^139-585^E:2.1e-16`PF01235.14^Na_Ala_symp^Sodium:alanine symporter family^171-319^E:4.2e-06`PF03522.12^SLC12^Solute carrier family 12^648-769^E:1.5e-13`PF03522.12^SLC12^Solute carrier family 12^780-979^E:3.2e-27	COG0531^amino acid	KEGG:ath:AT1G30450	GO:0005768^cellular_component^endosome`GO:0005794^cellular_component^Golgi apparatus`GO:0016021^cellular_component^integral component of membrane`GO:0005886^cellular_component^plasma membrane`GO:0005802^cellular_component^trans-Golgi network`GO:0022820^molecular_function^potassium ion symporter activity`GO:0015379^molecular_function^potassium:chloride symporter activity`GO:0008511^molecular_funct…	GO:0006810^biological_process^transport`GO:0055085^biological_process^transmembrane transport`GO:0016020^cellular_component^membrane`GO:0015171^molecular_function^amino acid transmembrane transporter activity`GO:0003333^biological_process^amino acid transmembrane transport`GO:0015655^molecular_function^alanine:sodium symporter activity`GO:0006814^biological_process^sodium ion transport`GO:0032328…
c21777_g1_i1	Inf	1.85420541170219e-11	4.52364313608278e-08	c21777_g1	PPR52_ARATH^PPR52_ARATH^Q:146-2815,H:1-894^58.324%ID^E:0^RecName: Full=Pentatricopeptide repeat-containing protein At1g19720;^Eukaryota; Viridiplantae; Streptophyta; Embryophyta; Tracheophyta; Spermatophyta; Magnoliophyta; eudicotyledons; Gunneridae; Pentapetalae; rosids; malvids; Brassicales; Brassicaceae; Camelineae; Arabidopsis	Gene.12798::c21777_g1_i1::g.12798::m.12798	146-2818[+]	PF01535.17^PPR^PPR repeat^120-144^E:0.0006`PF01535.17^PPR^PPR repeat^146-176^E:0.00013`PF01535.17^PPR^PPR repeat^219-244^E:0.015`PF12854.4^PPR_1^PPR repeat^244-273^E:2e-08`PF13041.3^PPR_2^PPR repeat family^245-291^E:5.9e-16`PF13812.3^PPR_3^Pentatricopeptide repeat domain^245-291^E:3.5e-07`PF01535.17^PPR^PPR repeat^247-277^E:6.5e-10`PF12854.4^PPR_1^PPR repeat^275-308^E:8.6e-06`PF13041.3^PPR_2^PPR …	ENOG410Z7Z7^Pentatricopeptide repeat-containing protein	KEGG:ath:AT1G19720	GO:0009507^cellular_component^chloroplast`GO:0005737^cellular_component^cytoplasm`GO:0005634^cellular_component^nucleus	GO:0008270^molecular_function^zinc ion binding
c30834_g1_i8	Inf	2.06233095525831e-11	4.91439078282554e-08	c30834_g1	NCKP1_ARATH^NCKP1_ARATH^Q:221-2587,H:1-813^82.784%ID^E:0^RecName: Full=Protein NAP1;^Eukaryota; Viridiplantae; Streptophyta; Embryophyta; Tracheophyta; Spermatophyta; Magnoliophyta; eudicotyledons; Gunneridae; Pentapetalae; rosids; malvids; Brassicales; Brassicaceae; Camelineae; Arabidopsis	Gene.78574::c30834_g1_i8::g.78574::m.78574	221-2590[+]	PF09735.6^Nckap1^Membrane-associated apoptosis protein^76-789^E:1.8e-195	ENOG410XPQI^nck-associated protein	KEGG:ath:AT2G35110	GO:0005789^cellular_component^endoplasmic reticulum membrane`GO:0005634^cellular_component^nucleus`GO:0031209^cellular_component^SCAR complex`GO:0007015^biological_process^actin filament organization`GO:0045010^biological_process^actin nucleation`GO:0009825^biological_process^multidimensional cell growth`GO:0045893^biological_process^positive regulation of transcription, DNA-templated`GO:0010090^…	.
c30499_g1_i4	Inf	3.15701024856474e-11	7.35195936657806e-08	c30499_g1	CALS8_ARATH^CALS8_ARATH^Q:330-4025,H:1-1251^68.825%ID^E:0^RecName: Full=Putative callose synthase 8;^Eukaryota; Viridiplantae; Streptophyta; Embryophyta; Tracheophyta; Spermatophyta; Magnoliophyta; eudicotyledons; Gunneridae; Pentapetalae; rosids; malvids; Brassicales; Brassicaceae; Camelineae; Arabidopsis`CALS8_ARATH^CALS8_ARATH^Q:4042-6195,H:1258-1974^80.919%ID^E:0^RecName: Full=Putative callos…	Gene.74638::c30499_g1_i4::g.74638::m.74638	330-4031[+]	PF04652.13^Vta1^Vta1 like^64-198^E:5.4e-11`PF14288.3^FKS1_dom1^1,3-beta-glucan synthase subunit FKS1, domain-1^337-448^E:4.9e-39`PF02364.12^Glucan_synthase^1,3-beta-glucan synthase component^1088-1220^E:7.6e-35	ENOG410XQ8V^synthase	.	GO:0000148^cellular_component^1,3-beta-D-glucan synthase complex`GO:0016021^cellular_component^integral component of membrane`GO:0003843^molecular_function^1,3-beta-D-glucan synthase activity`GO:0006075^biological_process^(1->3)-beta-D-glucan biosynthetic process`GO:0071555^biological_process^cell wall organization`GO:0008360^biological_process^regulation of cell shape	GO:0003843^molecular_function^1,3-beta-D-glucan synthase activity`GO:0006075^biological_process^(1->3)-beta-D-glucan biosynthetic process`GO:0000148^cellular_component^1,3-beta-D-glucan synthase complex`GO:0016020^cellular_component^membrane
c30426_g3_i2	Inf	1.13537815246704e-10	2.42370120355599e-07	c30426_g3	4CLL9_ARATH^4CLL9_ARATH^Q:1685-87,H:11-555^54.113%ID^E:0^RecName: Full=4-coumarate--CoA ligase-like 9;^Eukaryota; Viridiplantae; Streptophyta; Embryophyta; Tracheophyta; Spermatophyta; Magnoliophyta; eudicotyledons; Gunneridae; Pentapetalae; rosids; malvids; Brassicales; Brassicaceae; Camelineae; Arabidopsis	Gene.73769::c30426_g3_i2::g.73769::m.73769	1706-57[-]	PF00501.25^AMP-binding^AMP-binding enzyme^53-445^E:6.9e-92`PF13193.3^AMP-binding_C^AMP-binding enzyme C-terminal domain^454-529^E:1.3e-17	COG0318^Amp-dependent synthetase and ligase	KEGG:ath:AT5G63380	GO:0005777^cellular_component^peroxisome`GO:0005524^molecular_function^ATP binding`GO:0004321^molecular_function^fatty-acyl-CoA synthase activity`GO:0016874^molecular_function^ligase activity`GO:0009695^biological_process^jasmonic acid biosynthetic process`GO:0031408^biological_process^oxylipin biosynthetic process	GO:0003824^molecular_function^catalytic activity`GO:0008152^biological_process^metabolic process
c29572_g1_i3	Inf	1.7410053702431e-10	3.56787712534659e-07	c29572_g1	U2AFA_ARATH^U2AFA_ARATH^Q:3297-2743,H:1-185^95.135%ID^E:2.11e-112^RecName: Full=Splicing factor U2af small subunit A;^Eukaryota; Viridiplantae; Streptophyta; Embryophyta; Tracheophyta; Spermatophyta; Magnoliophyta; eudicotyledons; Gunneridae; Pentapetalae; rosids; malvids; Brassicales; Brassicaceae; Camelineae; Arabidopsis	Gene.64548::c29572_g1_i3::g.64548::m.64548	3297-2464[-]	PF00642.21^zf-CCCH^Zinc finger C-x8-C-x5-C-x3-H type (and similar)^14-38^E:2.6e-07`PF00076.19^RRM_1^RNA recognition motif. (a.k.a. RRM, RBD, or RNP domain)^83-139^E:5.8e-08`PF00642.21^zf-CCCH^Zinc finger C-x8-C-x5-C-x3-H type (and similar)^150-174^E:0.00011	ENOG410Z5PX^auxiliary factor	KEGG:ath:AT5G42820`KO:K12836	GO:0016607^cellular_component^nuclear speck`GO:0005634^cellular_component^nucleus`GO:0005681^cellular_component^spliceosomal complex`GO:0003677^molecular_function^DNA binding`GO:0046872^molecular_function^metal ion binding`GO:0000166^molecular_function^nucleotide binding`GO:0003723^molecular_function^RNA binding`GO:0006397^biological_process^mRNA processing`GO:0048573^biological_process^photoperi…	GO:0046872^molecular_function^metal ion binding`GO:0003676^molecular_function^nucleic acid binding
c31420_g1_i9	Inf	4.09899920914296e-10	7.92468024460457e-07	c31420_g1	.	Gene.85226::c31420_g1_i9::g.85226::m.85226	1341-2450[+]	PF04842.9^DUF639^Plant protein of unknown function (DUF639)^1-356^E:4.2e-107	.	.	.	.
c31336_g1_i6	Inf	4.09899920914296e-10	7.92468024460457e-07	c31336_g1	VP13A_SCHPO^VP13A_SCHPO^Q:2030-891,H:2453-2907^20.896%ID^E:7.46e-08^RecName: Full=Vacuolar protein sorting-associated protein 13a;^Eukaryota; Fungi; Dikarya; Ascomycota; Taphrinomycotina; Schizosaccharomycetes; Schizosaccharomycetales; Schizosaccharomycetaceae; Schizosaccharomyces	Gene.84169::c31336_g1_i6::g.84169::m.84169	9868-2942[-]	.	.	.	.	.
c29111_g2_i6	Inf	5.65358976458318e-10	1.07277912744033e-06	c29111_g2	TAF2_ARATH^TAF2_ARATH^Q:535-2376,H:154-767^72.801%ID^E:0^RecName: Full=Transcription initiation factor TFIID subunit 2;^Eukaryota; Viridiplantae; Streptophyta; Embryophyta; Tracheophyta; Spermatophyta; Magnoliophyta; eudicotyledons; Gunneridae; Pentapetalae; rosids; malvids; Brassicales; Brassicaceae; Camelineae; Arabidopsis`TAF2_ARATH^TAF2_ARATH^Q:4216-5673,H:758-1284^52.15%ID^E:1.05e-131^RecNam…	Gene.59721::c29111_g2_i6::g.59721::m.59721	4267-6051[+]	.	ENOG410XS52^TAF2 RNA polymerase II, TATA box binding protein (TBP)-associated factor	KEGG:ath:AT1G73960`KO:K03128	GO:0009506^cellular_component^plasmodesma`GO:0005669^cellular_component^transcription factor TFIID complex`GO:0003682^molecular_function^chromatin binding`GO:0008237^molecular_function^metallopeptidase activity`GO:0001129^molecular_function^RNA polymerase II transcription factor activity, TBP-class protein binding, involved in preinitiation complex assembly`GO:0043565^molecular_function^sequence-…	.
c29015_g2_i10	Inf	1.33422370791343e-09	2.32099811205424e-06	c29015_g2	ALY3_ARATH^ALY3_ARATH^Q:3621-301,H:69-1132^49.779%ID^E:0^RecName: Full=Protein ALWAYS EARLY 3;^Eukaryota; Viridiplantae; Streptophyta; Embryophyta; Tracheophyta; Spermatophyta; Magnoliophyta; eudicotyledons; Gunneridae; Pentapetalae; rosids; malvids; Brassicales; Brassicaceae; Camelineae; Arabidopsis	Gene.58798::c29015_g2_i10::g.58798::m.58798	3588-295[-]	PF06584.10^DIRP^DIRP^561-661^E:2.8e-29	ENOG410YA1T^lin-9 homolog (C. elegans)	KEGG:ath:AT3G21430	GO:0005634^cellular_component^nucleus`GO:0017053^cellular_component^transcriptional repressor complex`GO:0003677^molecular_function^DNA binding`GO:0007049^biological_process^cell cycle`GO:0006351^biological_process^transcription, DNA-templated	GO:0006351^biological_process^transcription, DNA-templated`GO:0007049^biological_process^cell cycle`GO:0017053^cellular_component^transcriptional repressor complex
c28091_g1_i6	Inf	1.48557405964038e-09	2.53701385991851e-06	c28091_g1	PRP16_ARATH^PRP16_ARATH^Q:2141-321,H:650-1255^87.479%ID^E:0^RecName: Full=Pre-mRNA-splicing factor ATP-dependent RNA helicase DEAH7 {ECO:0000305};^Eukaryota; Viridiplantae; Streptophyta; Embryophyta; Tracheophyta; Spermatophyta; Magnoliophyta; eudicotyledons; Gunneridae; Pentapetalae; rosids; malvids; Brassicales; Brassicaceae; Camelineae; Arabidopsis`PRP16_ARATH^PRP16_ARATH^Q:4329-2311,H:3-654^6…	Gene.49229::c28091_g1_i6::g.49229::m.49229	4359-2284[-]	.	COG1643^helicase	KEGG:ath:AT5G13010`KO:K12815	GO:0005634^cellular_component^nucleus`GO:0005681^cellular_component^spliceosomal complex`GO:0005524^molecular_function^ATP binding`GO:0004386^molecular_function^helicase activity`GO:0003676^molecular_function^nucleic acid binding`GO:0010467^biological_process^gene expression`GO:0045087^biological_process^innate immune response`GO:0000398^biological_process^mRNA splicing, via spliceosome`GO:003312…	.
c27812_g1_i1	Inf	1.65413771154001e-09	2.77857171722392e-06	c27812_g1	MA656_ARATH^MA656_ARATH^Q:535-1854,H:1-444^72.748%ID^E:0^RecName: Full=65-kDa microtubule-associated protein 6;^Eukaryota; Viridiplantae; Streptophyta; Embryophyta; Tracheophyta; Spermatophyta; Magnoliophyta; eudicotyledons; Gunneridae; Pentapetalae; rosids; malvids; Brassicales; Brassicaceae; Camelineae; Arabidopsis`MA656_ARATH^MA656_ARATH^Q:1914-2408,H:439-608^67.059%ID^E:0^RecName: Full=65-kDa…	Gene.46630::c27812_g1_i1::g.46630::m.46630	535-1887[+]	PF03999.9^MAP65_ASE1^Microtubule associated protein (MAP65/ASE1 family)^52-439^E:4.5e-68	ENOG410YZBK^protein regulator of cytokinesis	KEGG:ath:AT2G01910`KO:K16732	GO:0005874^cellular_component^microtubule`GO:0005739^cellular_component^mitochondrion`GO:0005634^cellular_component^nucleus`GO:0009524^cellular_component^phragmoplast`GO:0009536^cellular_component^plastid`GO:0009574^cellular_component^preprophase band`GO:0008017^molecular_function^microtubule binding`GO:0000910^biological_process^cytokinesis`GO:0000226^biological_process^microtubule cytoskeleton …	.
c30994_g1_i4	Inf	3.15414534378874e-09	5.04988526244777e-06	c30994_g1	RDR1_ARATH^RDR1_ARATH^Q:3535-266,H:1-1085^55.465%ID^E:0^RecName: Full=RNA-dependent RNA polymerase 1;^Eukaryota; Viridiplantae; Streptophyta; Embryophyta; Tracheophyta; Spermatophyta; Magnoliophyta; eudicotyledons; Gunneridae; Pentapetalae; rosids; malvids; Brassicales; Brassicaceae; Camelineae; Arabidopsis	Gene.80398::c30994_g1_i4::g.80398::m.80398	3535-236[-]	PF05183.9^RdRP^RNA dependent RNA polymerase^357-932^E:1e-173	ENOG410XQMQ^rna polymerase	KEGG:ath:AT1G14790`KO:K11699	GO:0003723^molecular_function^RNA binding`GO:0003968^molecular_function^RNA-directed RNA polymerase activity`GO:0006952^biological_process^defense response`GO:0060148^biological_process^positive regulation of posttranscriptional gene silencing`GO:0030422^biological_process^production of siRNA involved in RNA interference`GO:0009751^biological_process^response to salicylic acid`GO:0009615^biologic…	GO:0003968^molecular_function^RNA-directed RNA polymerase activity
c30277_g1_i5	Inf	3.51269994228828e-09	5.45351988312895e-06	c30277_g1	MAA3_ARATH^MAA3_ARATH^Q:2803-725,H:89-787^69.615%ID^E:0^RecName: Full=Probable helicase MAGATAMA 3;^Eukaryota; Viridiplantae; Streptophyta; Embryophyta; Tracheophyta; Spermatophyta; Magnoliophyta; eudicotyledons; Gunneridae; Pentapetalae; rosids; malvids; Brassicales; Brassicaceae; Camelineae; Arabidopsis	Gene.72116::c30277_g1_i5::g.72116::m.72116	2638-590[-]	PF13086.3^AAA_11^AAA domain^110-300^E:2e-29`PF13245.3^AAA_19^Part of AAA domain^116-151^E:7.7e-06`PF13086.3^AAA_11^AAA domain^285-378^E:4.7e-34`PF13087.3^AAA_12^AAA domain^386-582^E:8.7e-63	COG1112^Helicase	KEGG:ath:AT4G15570`KO:K10706	GO:0005634^cellular_component^nucleus`GO:0005524^molecular_function^ATP binding`GO:0004386^molecular_function^helicase activity`GO:0009553^biological_process^embryo sac development`GO:0010183^biological_process^pollen tube guidance`GO:0009875^biological_process^pollen-pistil interaction	.
c26152_g1_i4	Inf	3.51269994228828e-09	5.45351988312895e-06	c26152_g1	PI5K1_ARATH^PI5K1_ARATH^Q:432-1985,H:72-578^79.344%ID^E:0^RecName: Full=Phosphatidylinositol 4-phosphate 5-kinase 1;^Eukaryota; Viridiplantae; Streptophyta; Embryophyta; Tracheophyta; Spermatophyta; Magnoliophyta; eudicotyledons; Gunneridae; Pentapetalae; rosids; malvids; Brassicales; Brassicaceae; Camelineae; Arabidopsis	Gene.33423::c26152_g1_i4::g.33423::m.33423	165-1988[+]	PF02493.17^MORN^MORN repeat^99-121^E:5.4e-06`PF02493.17^MORN^MORN repeat^122-143^E:1.1e-07`PF02493.17^MORN^MORN repeat^145-166^E:7.2e-05`PF02493.17^MORN^MORN repeat^168-189^E:8.3e-05`PF02493.17^MORN^MORN repeat^191-212^E:0.0038`PF02493.17^MORN^MORN repeat^214-235^E:6.2e-07`PF02493.17^MORN^MORN repeat^237-259^E:2.7e-06`PF01504.15^PIP5K^Phosphatidylinositol-4-phosphate 5-Kinase^468-607^E:1.3e-52	COG4642^whole genome shotgun sequence`COG5253^phosphatidylinositol-4-phosphate 5-kinase	KEGG:ath:AT1G21980`KO:K00889	GO:0005886^cellular_component^plasma membrane`GO:0016308^molecular_function^1-phosphatidylinositol-4-phosphate 5-kinase activity`GO:0051015^molecular_function^actin filament binding`GO:0003785^molecular_function^actin monomer binding`GO:0005524^molecular_function^ATP binding`GO:0016307^molecular_function^phosphatidylinositol phosphate kinase activity`GO:0046854^biological_process^phosphatidylinos…	GO:0016307^molecular_function^phosphatidylinositol phosphate kinase activity`GO:0046488^biological_process^phosphatidylinositol metabolic process
c27037_g1_i1	Inf	3.91211966495225e-09	5.98297393416414e-06	c27037_g1	FES1_ARATH^FES1_ARATH^Q:4498-2849,H:76-586^33.569%ID^E:1.01e-57^RecName: Full=Protein FRIGIDA-ESSENTIAL 1;^Eukaryota; Viridiplantae; Streptophyta; Embryophyta; Tracheophyta; Spermatophyta; Magnoliophyta; eudicotyledons; Gunneridae; Pentapetalae; rosids; malvids; Brassicales; Brassicaceae; Camelineae; Arabidopsis	Gene.40227::c27037_g1_i1::g.40227::m.40227	4501-2843[-]	PF00642.21^zf-CCCH^Zinc finger C-x8-C-x5-C-x3-H type (and similar)^24-46^E:2.9e-05	ENOG410YNGS^zinc finger CCCH domain-containing protein	KEGG:ath:AT2G33835	GO:0005634^cellular_component^nucleus`GO:0003677^molecular_function^DNA binding`GO:0046872^molecular_function^metal ion binding`GO:0030154^biological_process^cell differentiation`GO:0009908^biological_process^flower development`GO:0010220^biological_process^positive regulation of vernalization response	GO:0046872^molecular_function^metal ion binding
c28511_g1_i14	Inf	4.85276735673497e-09	7.20642985471312e-06	c28511_g1	ATAD1_RAT^ATAD1_RAT^Q:1434-718,H:70-307^47.28%ID^E:1.68e-67^RecName: Full=ATPase family AAA domain-containing protein 1;^Eukaryota; Metazoa; Chordata; Craniata; Vertebrata; Euteleostomi; Mammalia; Eutheria; Euarchontoglires; Glires; Rodentia; Sciurognathi; Muroidea; Muridae; Murinae; Rattus	Gene.53112::c28511_g1_i14::g.53112::m.53112	3519-460[-]	PF05496.9^RuvB_N^Holliday junction DNA helicase ruvB N-terminus^753-823^E:0.00014`PF00004.26^AAA^ATPase family associated with various cellular activities (AAA)^755-884^E:1.9e-36	COG0464^Aaa atpase	KEGG:dre:368672	GO:0030054^cellular_component^cell junction`GO:0005777^cellular_component^peroxisome`GO:0045211^cellular_component^postsynaptic membrane`GO:0005524^molecular_function^ATP binding`GO:0008568^molecular_function^microtubule-severing ATPase activity	GO:0009378^molecular_function^four-way junction helicase activity`GO:0006281^biological_process^DNA repair`GO:0006310^biological_process^DNA recombination`GO:0005524^molecular_function^ATP binding
c27122_g1_i4	Inf	6.70569026793753e-09	9.67753885907729e-06	c27122_g1	PPR10_ARATH^PPR10_ARATH^Q:166-2067,H:29-665^55.486%ID^E:0^RecName: Full=Pentatricopeptide repeat-containing protein At1g04840;^Eukaryota; Viridiplantae; Streptophyta; Embryophyta; Tracheophyta; Spermatophyta; Magnoliophyta; eudicotyledons; Gunneridae; Pentapetalae; rosids; malvids; Brassicales; Brassicaceae; Camelineae; Arabidopsis	Gene.40916::c27122_g1_i4::g.40916::m.40916	82-2070[+]	PF01535.17^PPR^PPR repeat^94-123^E:0.17`PF01535.17^PPR^PPR repeat^196-223^E:3.1e-08`PF12854.4^PPR_1^PPR repeat^196-219^E:7.6e-07`PF01535.17^PPR^PPR repeat^226-255^E:3.5e-07`PF01535.17^PPR^PPR repeat^256-286^E:8.8e-08`PF01535.17^PPR^PPR repeat^329-355^E:0.11`PF01535.17^PPR^PPR repeat^358-387^E:0.00013`PF13812.3^PPR_3^Pentatricopeptide repeat domain^379-438^E:0.0006`PF14432.3^DYW_deaminase^DYW fami…	ENOG410Z7Z7^Pentatricopeptide repeat-containing protein	KEGG:ath:AT1G04840	.	GO:0008270^molecular_function^zinc ion binding
c30095_g2_i20	Inf	7.46938722225411e-09	1.06299754321596e-05	c30095_g2	BCAL2_ARATH^BCAL2_ARATH^Q:4224-2893,H:1-400^55.263%ID^E:3.62e-146^RecName: Full=Branched-chain-amino-acid aminotransferase-like protein 2;^Eukaryota; Viridiplantae; Streptophyta; Embryophyta; Tracheophyta; Spermatophyta; Magnoliophyta; eudicotyledons; Gunneridae; Pentapetalae; rosids; malvids; Brassicales; Brassicaceae; Camelineae; Arabidopsis`BCAL2_ARATH^BCAL2_ARATH^Q:1850-1689,H:448-501^79.63%I…	Gene.70087::c30095_g2_i20::g.70087::m.70087	4236-3205[-]	.	COG0115^brancheD-chain amino acid aminotransferase	.	GO:0003824^molecular_function^catalytic activity	.
c31494_g2_i12	Inf	8.32028499370158e-09	1.15208962454679e-05	c31494_g2	Y5977_ARATH^Y5977_ARATH^Q:498-3191,H:25-906^49.175%ID^E:0^RecName: Full=Probable leucine-rich repeat receptor-like protein kinase At5g49770;^Eukaryota; Viridiplantae; Streptophyta; Embryophyta; Tracheophyta; Spermatophyta; Magnoliophyta; eudicotyledons; Gunneridae; Pentapetalae; rosids; malvids; Brassicales; Brassicaceae; Camelineae; Arabidopsis	Gene.86030::c31494_g2_i12::g.86030::m.86030	438-3368[+]	PF08263.9^LRRNT_2^Leucine rich repeat N-terminal domain^41-61^E:0.015`PF00069.22^Pkinase^Protein kinase domain^647-914^E:3.2e-46`PF07714.14^Pkinase_Tyr^Protein tyrosine kinase^649-916^E:2.6e-49	COG0515^Serine Threonine protein kinase`COG4886^leucine Rich Repeat	KEGG:ath:AT5G49770	GO:0016021^cellular_component^integral component of membrane`GO:0005524^molecular_function^ATP binding`GO:0004674^molecular_function^protein serine/threonine kinase activity	GO:0004672^molecular_function^protein kinase activity`GO:0005524^molecular_function^ATP binding`GO:0006468^biological_process^protein phosphorylation
c25153_g2_i11	Inf	9.26836601458505e-09	1.26625652273396e-05	c25153_g2	RNP1_ARATH^RNP1_ARATH^Q:632-1195,H:1-192^56.25%ID^E:8.46e-70^RecName: Full=Heterogeneous nuclear ribonucleoprotein 1;^Eukaryota; Viridiplantae; Streptophyta; Embryophyta; Tracheophyta; Spermatophyta; Magnoliophyta; eudicotyledons; Gunneridae; Pentapetalae; rosids; malvids; Brassicales; Brassicaceae; Camelineae; Arabidopsis	Gene.27470::c25153_g2_i11::g.27470::m.27470	632-2068[+]	PF00076.19^RRM_1^RNA recognition motif. (a.k.a. RRM, RBD, or RNP domain)^8-69^E:1.2e-16`PF16367.2^RRM_7^RNA recognition motif^106-172^E:3.3e-06`PF00076.19^RRM_1^RNA recognition motif. (a.k.a. RRM, RBD, or RNP domain)^108-165^E:1.2e-15	ENOG410YA8Z^Rna-binding protein	KEGG:ath:AT4G14300`KO:K14411	GO:0005737^cellular_component^cytoplasm`GO:0005681^cellular_component^spliceosomal complex`GO:0000166^molecular_function^nucleotide binding`GO:0003723^molecular_function^RNA binding`GO:0006397^biological_process^mRNA processing`GO:0051028^biological_process^mRNA transport`GO:0008380^biological_process^RNA splicing	GO:0003676^molecular_function^nucleic acid binding
c24381_g1_i2	Inf	1.7719024143382e-08	2.26949690984472e-05	c24381_g1	PP270_ARATH^PP270_ARATH^Q:182-2173,H:1-650^57.25%ID^E:0^RecName: Full=Pentatricopeptide repeat-containing protein At3g48810;^Eukaryota; Viridiplantae; Streptophyta; Embryophyta; Tracheophyta; Spermatophyta; Magnoliophyta; eudicotyledons; Gunneridae; Pentapetalae; rosids; malvids; Brassicales; Brassicaceae; Camelineae; Arabidopsis	Gene.23181::c24381_g1_i2::g.23181::m.23181	182-2188[+]	PF13812.3^PPR_3^Pentatricopeptide repeat domain^104-161^E:2.8e-05`PF01535.17^PPR^PPR repeat^119-148^E:0.00062`PF13041.3^PPR_2^PPR repeat family^150-199^E:2.4e-13`PF13812.3^PPR_3^Pentatricopeptide repeat domain^176-232^E:6e-09`PF12854.4^PPR_1^PPR repeat^181-213^E:2.1e-12`PF13041.3^PPR_2^PPR repeat family^185-234^E:1.9e-16`PF01535.17^PPR^PPR repeat^188-218^E:5.1e-07`PF12854.4^PPR_1^PPR repeat^216-2…	ENOG410Z7Z7^Pentatricopeptide repeat-containing protein	KEGG:ath:AT3G48810	.	.
c30355_g2_i6	Inf	3.04294217916276e-08	3.7118823015487e-05	c30355_g2	NRPC1_ARATH^NRPC1_ARATH^Q:387-2099,H:650-1202^66.958%ID^E:0^RecName: Full=DNA-directed RNA polymerase III subunit 1 {ECO:0000305};^Eukaryota; Viridiplantae; Streptophyta; Embryophyta; Tracheophyta; Spermatophyta; Magnoliophyta; eudicotyledons; Gunneridae; Pentapetalae; rosids; malvids; Brassicales; Brassicaceae; Camelineae; Arabidopsis`NRPC1_ARATH^NRPC1_ARATH^Q:2-397,H:533-657^75%ID^E:0^RecName: …	Gene.72959::c30355_g2_i6::g.72959::m.72959	480-2174[+]	PF05000.14^RNA_pol_Rpb1_4^RNA polymerase Rpb1, domain 4^50-155^E:3.2e-29`PF04998.14^RNA_pol_Rpb1_5^RNA polymerase Rpb1, domain 5^162-552^E:1.8e-66	COG0086^DNA-dependent RNA polymerase catalyzes the transcription of DNA into RNA using the four ribonucleoside triphosphates as substrates (By similarity)	.	GO:0005634^cellular_component^nucleus`GO:0003677^molecular_function^DNA binding`GO:0003899^molecular_function^DNA-directed RNA polymerase activity`GO:0046872^molecular_function^metal ion binding`GO:0006351^biological_process^transcription, DNA-templated	GO:0003677^molecular_function^DNA binding`GO:0003899^molecular_function^DNA-directed RNA polymerase activity`GO:0006351^biological_process^transcription, DNA-templated
c30654_g1_i9	Inf	4.69233092336907e-08	5.40955152021771e-05	c30654_g1	Y1523_ARATH^Y1523_ARATH^Q:4332-2803,H:40-552^68.208%ID^E:0^RecName: Full=C-type lectin receptor-like tyrosine-protein kinase At1g52310;^Eukaryota; Viridiplantae; Streptophyta; Embryophyta; Tracheophyta; Spermatophyta; Magnoliophyta; eudicotyledons; Gunneridae; Pentapetalae; rosids; malvids; Brassicales; Brassicaceae; Camelineae; Arabidopsis	Gene.76398::c30654_g1_i9::g.76398::m.76398	4464-2800[-]	PF00059.18^Lectin_C^Lectin C-type domain^71-186^E:3.3e-07`PF00069.22^Pkinase^Protein kinase domain^272-542^E:3.8e-37`PF07714.14^Pkinase_Tyr^Protein tyrosine kinase^275-544^E:6.5e-40	COG0515^Serine Threonine protein kinase	KEGG:ath:AT1G52310	GO:0016021^cellular_component^integral component of membrane`GO:0005886^cellular_component^plasma membrane`GO:0005524^molecular_function^ATP binding`GO:0030246^molecular_function^carbohydrate binding`GO:0004714^molecular_function^transmembrane receptor protein tyrosine kinase activity	GO:0004672^molecular_function^protein kinase activity`GO:0005524^molecular_function^ATP binding`GO:0006468^biological_process^protein phosphorylation
c31449_g1_i4	Inf	4.69233092336907e-08	5.40955152021771e-05	c31449_g1	POLX_TOBAC^POLX_TOBAC^Q:4290-5792,H:810-1321^38.521%ID^E:4.5e-99^RecName: Full=Retrovirus-related Pol polyprotein from transposon TNT 1-94;^Eukaryota; Viridiplantae; Streptophyta; Embryophyta; Tracheophyta; Spermatophyta; Magnoliophyta; eudicotyledons; Gunneridae; Pentapetalae; asterids; lamiids; Solanales; Solanaceae; Nicotianoideae; Nicotianeae; Nicotiana`POLX_TOBAC^POLX_TOBAC^Q:3141-3677,H:503…	Gene.85502::c31449_g1_i4::g.85502::m.85502	3126-4445[+]	.	.	.	GO:0004190^molecular_function^aspartic-type endopeptidase activity`GO:0004519^molecular_function^endonuclease activity`GO:0003676^molecular_function^nucleic acid binding`GO:0003964^molecular_function^RNA-directed DNA polymerase activity`GO:0008270^molecular_function^zinc ion binding`GO:0015074^biological_process^DNA integration	.
c26616_g1_i3	Inf	8.99257814501283e-08	9.59826575215505e-05	c26616_g1	ASPL2_ARATH^ASPL2_ARATH^Q:2277-1192,H:40-385^39.394%ID^E:1.22e-67^RecName: Full=Aspartic proteinase-like protein 2;^Eukaryota; Viridiplantae; Streptophyta; Embryophyta; Tracheophyta; Spermatophyta; Magnoliophyta; eudicotyledons; Gunneridae; Pentapetalae; rosids; malvids; Brassicales; Brassicaceae; Camelineae; Arabidopsis	Gene.36783::c26616_g1_i3::g.36783::m.36783	2406-1075[-]	PF14543.3^TAXi_N^Xylanase inhibitor N-terminal^82-267^E:4.7e-42`PF00026.20^Asp^Eukaryotic aspartyl protease^82-414^E:8.1e-26`PF14541.3^TAXi_C^Xylanase inhibitor C-terminal^286-416^E:4.4e-22	ENOG410XNV7^aspartic	KEGG:ath:AT1G65240	GO:0031225^cellular_component^anchored component of membrane`GO:0046658^cellular_component^anchored component of plasma membrane`GO:0005886^cellular_component^plasma membrane`GO:0004190^molecular_function^aspartic-type endopeptidase activity	.
c25831_g1_i2	Inf	8.99257814501283e-08	9.59826575215505e-05	c25831_g1	PDS5B_CHICK^PDS5B_CHICK^Q:226-3198,H:19-1034^25.338%ID^E:3.59e-73^RecName: Full=Sister chromatid cohesion protein PDS5 homolog B;^Eukaryota; Metazoa; Chordata; Craniata; Vertebrata; Euteleostomi; Archelosauria; Archosauria; Dinosauria; Saurischia; Theropoda; Coelurosauria; Aves; Neognathae; Galloanserae; Galliformes; Phasianidae; Phasianinae; Gallus	Gene.31332::c25831_g1_i2::g.31332::m.31332	202-4539[+]	.	ENOG410XQW7^PDS5, regulator of cohesion maintenance, homolog	.	GO:0005634^cellular_component^nucleus`GO:0051301^biological_process^cell division`GO:0007064^biological_process^mitotic sister chromatid cohesion`GO:0008285^biological_process^negative regulation of cell proliferation	.
c24020_g1_i4	Inf	1.1172326547919e-07	0.000115634708288794	c24020_g1	AAP7_ARATH^AAP7_ARATH^Q:703-2064,H:21-443^57.734%ID^E:5.06e-175^RecName: Full=Probable amino acid permease 7;^Eukaryota; Viridiplantae; Streptophyta; Embryophyta; Tracheophyta; Spermatophyta; Magnoliophyta; eudicotyledons; Gunneridae; Pentapetalae; rosids; malvids; Brassicales; Brassicaceae; Camelineae; Arabidopsis	Gene.21626::c24020_g1_i4::g.21626::m.21626	1156-2139[+]	PF01490.15^Aa_trans^Transmembrane amino acid transporter protein^2-322^E:4.9e-67	COG0814^amino acid transport	KEGG:ath:AT5G23810	GO:0016021^cellular_component^integral component of membrane`GO:0016020^cellular_component^membrane`GO:0005886^cellular_component^plasma membrane`GO:0015293^molecular_function^symporter activity`GO:0006865^biological_process^amino acid transport	.
c29311_g1_i5	Inf	1.38819388323165e-07	0.000139453602391386	c29311_g1	DEK1_ARATH^DEK1_ARATH^Q:2760-793,H:1497-2151^85.213%ID^E:0^RecName: Full=Calpain-type cysteine protease DEK1;^Eukaryota; Viridiplantae; Streptophyta; Embryophyta; Tracheophyta; Spermatophyta; Magnoliophyta; eudicotyledons; Gunneridae; Pentapetalae; rosids; malvids; Brassicales; Brassicaceae; Camelineae; Arabidopsis	Gene.61894::c29311_g1_i5::g.61894::m.61894	2742-790[-]	PF00648.18^Peptidase_C2^Calpain family cysteine protease^195-494^E:7.7e-90`PF01067.19^Calpain_III^Calpain large subunit, domain III^506-643^E:4.1e-17	ENOG410XP0B^Calpain-like cysteine peptidase	.	GO:0005737^cellular_component^cytoplasm`GO:0005789^cellular_component^endoplasmic reticulum membrane`GO:0010008^cellular_component^endosome membrane`GO:0005887^cellular_component^integral component of plasma membrane`GO:0004198^molecular_function^calcium-dependent cysteine-type endopeptidase activity`GO:0008234^molecular_function^cysteine-type peptidase activity`GO:0009793^biological_process^embr…	GO:0004198^molecular_function^calcium-dependent cysteine-type endopeptidase activity`GO:0006508^biological_process^proteolysis`GO:0005622^cellular_component^intracellular
c27623_g1_i8	Inf	1.54746574174901e-07	0.000151012023518146	c27623_g1	C70A2_ARATH^C70A2_ARATH^Q:2314-1682,H:303-509^82.075%ID^E:7.58e-116^RecName: Full=Cytochrome P450 703A2 {ECO:0000303|PubMed:17496121};^Eukaryota; Viridiplantae; Streptophyta; Embryophyta; Tracheophyta; Spermatophyta; Magnoliophyta; eudicotyledons; Gunneridae; Pentapetalae; rosids; malvids; Brassicales; Brassicaceae; Camelineae; Arabidopsis	Gene.44937::c27623_g1_i8::g.44937::m.44937	1162-473[-]	PF01967.18^MoaC^MoaC family^85-220^E:6.1e-50	COG0315^Together with MoaA, is involved in the conversion of 5'- GTP to cyclic pyranopterin monophosphate (cPMP or molybdopterin precursor Z) (By similarity)	KEGG:ath:AT1G01290`KO:K03639	GO:0009507^cellular_component^chloroplast`GO:0005759^cellular_component^mitochondrial matrix`GO:0005739^cellular_component^mitochondrion`GO:0061597^molecular_function^cyclic pyranopterin monophosphate synthase activity`GO:0006777^biological_process^Mo-molybdopterin cofactor biosynthetic process	GO:0006777^biological_process^Mo-molybdopterin cofactor biosynthetic process
c27186_g1_i4	Inf	1.72505813527347e-07	0.000166754534800878	c27186_g1	.	Gene.41346::c27186_g1_i4::g.41346::m.41346	173-2095[+]	PF02841.11^GBP_C^Guanylate-binding protein, C-terminal domain^2-188^E:6.1e-09	.	.	.	GO:0003924^molecular_function^GTPase activity`GO:0005525^molecular_function^GTP binding
c25262_g1_i3	Inf	2.14389960521085e-07	0.000203404460136606	c25262_g1	D42E1_DANRE^D42E1_DANRE^Q:164-1258,H:8-357^44.384%ID^E:1.2e-89^RecName: Full=Short-chain dehydrogenase/reductase family 42E member 1 {ECO:0000250|UniProtKB:Q8WUS8};^Eukaryota; Metazoa; Chordata; Craniata; Vertebrata; Euteleostomi; Actinopterygii; Neopterygii; Teleostei; Ostariophysi; Cypriniformes; Cyprinidae; Danio	Gene.28073::c25262_g1_i3::g.28073::m.28073	131-1567[+]	PF04321.14^RmlD_sub_bind^RmlD substrate binding domain^14-211^E:4.7e-12`PF01073.16^3Beta_HSD^3-beta hydroxysteroid dehydrogenase/isomerase family^15-293^E:1.9e-85`PF01370.18^Epimerase^NAD dependent epimerase/dehydratase family^15-242^E:1.9e-29`PF02719.12^Polysacc_synt_2^Polysaccharide biosynthesis protein^15-130^E:9e-10`PF05368.10^NmrA^NmrA-like family^15-132^E:3.7e-07`PF16363.2^GDP_Man_Dehyd^GDP…	COG0451^Nad-dependent epimerase dehydratase	.	GO:0016021^cellular_component^integral component of membrane`GO:0003854^molecular_function^3-beta-hydroxy-delta5-steroid dehydrogenase activity`GO:0006694^biological_process^steroid biosynthetic process	GO:0003854^molecular_function^3-beta-hydroxy-delta5-steroid dehydrogenase activity`GO:0016616^molecular_function^oxidoreductase activity, acting on the CH-OH group of donors, NAD or NADP as acceptor`GO:0006694^biological_process^steroid biosynthetic process`GO:0055114^biological_process^oxidation-reduction process`GO:0003824^molecular_function^catalytic activity`GO:0050662^molecular_function^coen…
c20960_g1_i3	Inf	2.14389960521085e-07	0.000203404460136606	c20960_g1	RRP31_ARATH^RRP31_ARATH^Q:989-495,H:1-165^61.272%ID^E:3.83e-55^RecName: Full=30S ribosomal protein 3-1, chloroplastic;^Eukaryota; Viridiplantae; Streptophyta; Embryophyta; Tracheophyta; Spermatophyta; Magnoliophyta; eudicotyledons; Gunneridae; Pentapetalae; rosids; malvids; Brassicales; Brassicaceae; Camelineae; Arabidopsis	Gene.10510::c20960_g1_i3::g.10510::m.10510	989-492[-]	PF04839.10^PSRP-3_Ycf65^Plastid and cyanobacterial ribosomal protein (PSRP-3 / Ycf65)^112-158^E:4.7e-27	ENOG4111VGA^Probably a ribosomal protein or a ribosome-associated protein (By similarity)	.	GO:0009507^cellular_component^chloroplast`GO:0009570^cellular_component^chloroplast stroma`GO:0009535^cellular_component^chloroplast thylakoid membrane`GO:0005840^cellular_component^ribosome`GO:0009579^cellular_component^thylakoid`GO:0003735^molecular_function^structural constituent of ribosome`GO:0032544^biological_process^plastid translation	GO:0003735^molecular_function^structural constituent of ribosome`GO:0006412^biological_process^translation`GO:0005840^cellular_component^ribosome
c31469_g1_i1	Inf	2.66472407698853e-07	0.000245985240786222	c31469_g1	LORF2_HUMAN^LORF2_HUMAN^Q:2531-1203,H:381-823^24.667%ID^E:6.69e-30^RecName: Full=LINE-1 retrotransposable element ORF2 protein;^Eukaryota; Metazoa; Chordata; Craniata; Vertebrata; Euteleostomi; Mammalia; Eutheria; Euarchontoglires; Primates; Haplorrhini; Catarrhini; Hominidae; Homo	Gene.85727::c31469_g1_i1::g.85727::m.85727	4046-3432[-]	.	.	.	.	.
c26710_g1_i1	Inf	2.66472407698853e-07	0.000245985240786222	c26710_g1	ARFR_ARATH^ARFR_ARATH^Q:3-146,H:543-589^64.583%ID^E:6.04e-13^RecName: Full=Auxin response factor 18;^Eukaryota; Viridiplantae; Streptophyta; Embryophyta; Tracheophyta; Spermatophyta; Magnoliophyta; eudicotyledons; Gunneridae; Pentapetalae; rosids; malvids; Brassicales; Brassicaceae; Camelineae; Arabidopsis	.	.	.	ENOG410YECH^auxin response factor	KEGG:ath:AT3G61830	GO:0005634^cellular_component^nucleus`GO:0003677^molecular_function^DNA binding`GO:0003700^molecular_function^transcription factor activity, sequence-specific DNA binding`GO:0009734^biological_process^auxin-activated signaling pathway`GO:0006351^biological_process^transcription, DNA-templated	.
c25643_g1_i4	Inf	2.97093947210869e-07	0.000271803824954544	c25643_g1	FBK22_ARATH^FBK22_ARATH^Q:3544-2273,H:18-434^75.472%ID^E:0^RecName: Full=F-box/kelch-repeat protein At1g55270;^Eukaryota; Viridiplantae; Streptophyta; Embryophyta; Tracheophyta; Spermatophyta; Magnoliophyta; eudicotyledons; Gunneridae; Pentapetalae; rosids; malvids; Brassicales; Brassicaceae; Camelineae; Arabidopsis	Gene.30333::c25643_g1_i4::g.30333::m.30333	3556-2270[-]	PF00646.30^F-box^F-box domain^68-106^E:5.3e-05`PF13964.3^Kelch_6^Kelch motif^159-206^E:7.9e-06`PF01344.22^Kelch_1^Kelch motif^162-202^E:0.00026`PF01344.22^Kelch_1^Kelch motif^205-252^E:1.1e-14`PF13964.3^Kelch_6^Kelch motif^206-253^E:2.9e-09	ENOG4110X8D^Kelch repeat-containing F-box family protein	KEGG:ath:AT1G55270	.	GO:0005515^molecular_function^protein binding
c30372_g11_i1	Inf	3.31243321820265e-07	0.000295140680118568	c30372_g11	POLX_TOBAC^POLX_TOBAC^Q:156-734,H:845-1029^31.343%ID^E:2.99e-14^RecName: Full=Retrovirus-related Pol polyprotein from transposon TNT 1-94;^Eukaryota; Viridiplantae; Streptophyta; Embryophyta; Tracheophyta; Spermatophyta; Magnoliophyta; eudicotyledons; Gunneridae; Pentapetalae; asterids; lamiids; Solanales; Solanaceae; Nicotianoideae; Nicotianeae; Nicotiana`POLX_TOBAC^POLX_TOBAC^Q:445-1116,H:930-1…	Gene.73188::c30372_g11_i1::g.73188::m.73188	2440-2117[-]	.	.	.	.	.
c28735_g1_i1	Inf	3.31243321820265e-07	0.000295140680118568	c28735_g1	CSA1_ARATH^CSA1_ARATH^Q:1979-708,H:521-904^35.267%ID^E:1.69e-56^RecName: Full=Disease resistance-like protein CSA1 {ECO:0000305};^Eukaryota; Viridiplantae; Streptophyta; Embryophyta; Tracheophyta; Spermatophyta; Magnoliophyta; eudicotyledons; Gunneridae; Pentapetalae; rosids; malvids; Brassicales; Brassicaceae; Camelineae; Arabidopsis`CSA1_ARATH^CSA1_ARATH^Q:1307-3,H:637-1024^30.405%ID^E:4.08e-36…	Gene.55437::c28735_g1_i1::g.55437::m.55437	1979-3[-]	PF07725.9^LRR_3^Leucine Rich Repeat^155-172^E:0.00035`PF00560.30^LRR_1^Leucine Rich Repeat^385-405^E:0.79	COG4886^leucine Rich Repeat	KEGG:ath:AT5G17880	GO:0043531^molecular_function^ADP binding`GO:0005524^molecular_function^ATP binding`GO:0042742^biological_process^defense response to bacterium`GO:0007275^biological_process^multicellular organism development`GO:0009416^biological_process^response to light stimulus`GO:0010114^biological_process^response to red light`GO:0007165^biological_process^signal transduction	GO:0005515^molecular_function^protein binding
c29930_g2_i1	Inf	3.31243321820265e-07	0.000295140680118568	c29930_g2	ATR_ARATH^ATR_ARATH^Q:5934-1,H:252-2207^61.958%ID^E:0^RecName: Full=Serine/threonine-protein kinase ATR;^Eukaryota; Viridiplantae; Streptophyta; Embryophyta; Tracheophyta; Spermatophyta; Magnoliophyta; eudicotyledons; Gunneridae; Pentapetalae; rosids; malvids; Brassicales; Brassicaceae; Camelineae; Arabidopsis`ATR_ARATH^ATR_ARATH^Q:6776-6324,H:2-154^65.584%ID^E:6.61e-65^RecName: Full=Serine/threo…	Gene.68297::c29930_g2_i1::g.68297::m.68297	5910-1[-]	PF08064.10^UME^UME (NUC010) domain^845-945^E:6.5e-16`PF02259.20^FAT^FAT domain^1550-1928^E:7.4e-51	COG5032^phosphatidylinositol kinase activity	KEGG:ath:AT5G40820`KO:K06640	GO:0005634^cellular_component^nucleus`GO:0009506^cellular_component^plasmodesma`GO:0005524^molecular_function^ATP binding`GO:0016301^molecular_function^kinase activity`GO:0004674^molecular_function^protein serine/threonine kinase activity`GO:0006281^biological_process^DNA repair`GO:0006303^biological_process^double-strand break repair via nonhomologous end joining`GO:0007126^biological_process^me…	GO:0004674^molecular_function^protein serine/threonine kinase activity`GO:0005515^molecular_function^protein binding
c28775_g4_i1	Inf	4.11802603181205e-07	0.000351866435167225	c28775_g4	SERK1_ARATH^SERK1_ARATH^Q:3224-2625,H:9-208^82%ID^E:1.03e-98^RecName: Full=Somatic embryogenesis receptor kinase 1;^Eukaryota; Viridiplantae; Streptophyta; Embryophyta; Tracheophyta; Spermatophyta; Magnoliophyta; eudicotyledons; Gunneridae; Pentapetalae; rosids; malvids; Brassicales; Brassicaceae; Camelineae; Arabidopsis	Gene.55963::c28775_g4_i1::g.55963::m.55963	3245-2520[-]	PF08263.9^LRRNT_2^Leucine rich repeat N-terminal domain^25-65^E:4.6e-11`PF00560.30^LRR_1^Leucine Rich Repeat^93-115^E:0.27`PF00560.30^LRR_1^Leucine Rich Repeat^141-160^E:1.7`PF00560.30^LRR_1^Leucine Rich Repeat^165-182^E:0.2	ENOG410ZNK7^Somatic embryogenesis receptor kinase	KEGG:ath:AT1G71830`KO:K13418	GO:0005789^cellular_component^endoplasmic reticulum membrane`GO:0016021^cellular_component^integral component of membrane`GO:0005886^cellular_component^plasma membrane`GO:0005524^molecular_function^ATP binding`GO:0042802^molecular_function^identical protein binding`GO:0033612^molecular_function^receptor serine/threonine kinase binding`GO:0004675^molecular_function^transmembrane receptor protein s…	GO:0005515^molecular_function^protein binding
c26291_g1_i8	Inf	6.36669650505842e-07	0.000521895939269853	c26291_g1	XRN3_ARATH^XRN3_ARATH^Q:4769-2763,H:1-654^79.583%ID^E:0^RecName: Full=5'-3' exoribonuclease 3;^Eukaryota; Viridiplantae; Streptophyta; Embryophyta; Tracheophyta; Spermatophyta; Magnoliophyta; eudicotyledons; Gunneridae; Pentapetalae; rosids; malvids; Brassicales; Brassicaceae; Camelineae; Arabidopsis`XRN3_ARATH^XRN3_ARATH^Q:1933-1397,H:667-876^45.714%ID^E:5.78e-44^RecName: Full=5'-3' exoribonucle…	Gene.34430::c26291_g1_i8::g.34430::m.34430	4769-2745[-]	PF03159.15^XRN_N^XRN 5'-3' exonuclease N-terminus^1-253^E:8.5e-98`PF14392.3^zf-CCHC_4^Zinc knuckle^262-278^E:0.049`PF00098.20^zf-CCHC^Zinc knuckle^263-277^E:3.4e-05	COG5049^5'-3' exoribonuclease	KEGG:ath:AT1G75660`KO:K12619	GO:0005634^cellular_component^nucleus`GO:0004534^molecular_function^5'-3' exoribonuclease activity`GO:0003676^molecular_function^nucleic acid binding`GO:0008270^molecular_function^zinc ion binding`GO:0010587^biological_process^miRNA catabolic process`GO:0006397^biological_process^mRNA processing	GO:0003676^molecular_function^nucleic acid binding`GO:0004527^molecular_function^exonuclease activity`GO:0008270^molecular_function^zinc ion binding
c30431_g1_i6	Inf	7.09986030512533e-07	0.000572830146476356	c30431_g1	NRPB1_ARATH^NRPB1_ARATH^Q:6128-1524,H:1-1536^88.802%ID^E:0^RecName: Full=DNA-directed RNA polymerase II subunit 1;^Eukaryota; Viridiplantae; Streptophyta; Embryophyta; Tracheophyta; Spermatophyta; Magnoliophyta; eudicotyledons; Gunneridae; Pentapetalae; rosids; malvids; Brassicales; Brassicaceae; Camelineae; Arabidopsis	Gene.73841::c30431_g1_i6::g.73841::m.73841	6128-735[-]	PF04997.9^RNA_pol_Rpb1_1^RNA polymerase Rpb1, domain 1^14-350^E:4.5e-113`PF00623.17^RNA_pol_Rpb1_2^RNA polymerase Rpb1, domain 2^352-520^E:2.6e-71`PF04983.15^RNA_pol_Rpb1_3^RNA polymerase Rpb1, domain 3^524-687^E:9.9e-51`PF05000.14^RNA_pol_Rpb1_4^RNA polymerase Rpb1, domain 4^715-818^E:2.5e-39`PF04998.14^RNA_pol_Rpb1_5^RNA polymerase Rpb1, domain 5^825-1415^E:5.5e-106`PF04992.11^RNA_pol_Rpb1_6^RN…	COG0086^DNA-dependent RNA polymerase catalyzes the transcription of DNA into RNA using the four ribonucleoside triphosphates as substrates (By similarity)	KEGG:ath:AT4G35800`KO:K03006	GO:0005665^cellular_component^DNA-directed RNA polymerase II, core complex`GO:0003677^molecular_function^DNA binding`GO:0003899^molecular_function^DNA-directed RNA polymerase activity`GO:0046872^molecular_function^metal ion binding`GO:0006366^biological_process^transcription from RNA polymerase II promoter	GO:0003677^molecular_function^DNA binding`GO:0003899^molecular_function^DNA-directed RNA polymerase activity`GO:0006351^biological_process^transcription, DNA-templated`GO:0006366^biological_process^transcription from RNA polymerase II promoter`GO:0005665^cellular_component^DNA-directed RNA polymerase II, core complex
c28992_g2_i6	Inf	7.09986030512533e-07	0.000572830146476356	c28992_g2	ASF1A_ARATH^ASF1A_ARATH^Q:2317-1790,H:1-176^81.25%ID^E:2.08e-94^RecName: Full=Probable histone chaperone ASF1A;^Eukaryota; Viridiplantae; Streptophyta; Embryophyta; Tracheophyta; Spermatophyta; Magnoliophyta; eudicotyledons; Gunneridae; Pentapetalae; rosids; malvids; Brassicales; Brassicaceae; Camelineae; Arabidopsis	Gene.58473::c28992_g2_i6::g.58473::m.58473	2317-1769[-]	PF04729.10^ASF1_hist_chap^ASF1 like histone chaperone^1-153^E:5e-70	COG5137^ASF1 anti-silencing function 1 homolog	KEGG:ath:AT1G66740`KO:K10753	GO:0005737^cellular_component^cytoplasm`GO:0005634^cellular_component^nucleus`GO:0051301^biological_process^cell division`GO:0006333^biological_process^chromatin assembly or disassembly`GO:0016568^biological_process^chromatin modification`GO:0000724^biological_process^double-strand break repair via homologous recombination`GO:0031567^biological_process^mitotic cell size control checkpoint`GO:0008…	GO:0006333^biological_process^chromatin assembly or disassembly`GO:0005634^cellular_component^nucleus
c31157_g1_i9	Inf	7.9176665896607e-07	0.000623047615632532	c31157_g1	Y1439_ARATH^Y1439_ARATH^Q:3672-667,H:10-1000^46.39%ID^E:0^RecName: Full=BTB/POZ domain-containing protein At1g04390;^Eukaryota; Viridiplantae; Streptophyta; Embryophyta; Tracheophyta; Spermatophyta; Magnoliophyta; eudicotyledons; Gunneridae; Pentapetalae; rosids; malvids; Brassicales; Brassicaceae; Camelineae; Arabidopsis	Gene.82181::c31157_g1_i9::g.82181::m.82181	3723-649[-]	PF00651.28^BTB^BTB/POZ domain^852-927^E:6.4e-10	ENOG410YBFM^BTB POZ domain-containing protein	KEGG:ath:AT1G04390	GO:0016567^biological_process^protein ubiquitination	GO:0005515^molecular_function^protein binding
c30880_g5_i8	Inf	7.9176665896607e-07	0.000623047615632532	c30880_g5	TLOV1_ARATH^TLOV1_ARATH^Q:1052-3,H:19-362^57.67%ID^E:1.15e-131^RecName: Full=Protein TWIN LOV 1;^Eukaryota; Viridiplantae; Streptophyta; Embryophyta; Tracheophyta; Spermatophyta; Magnoliophyta; eudicotyledons; Gunneridae; Pentapetalae; rosids; malvids; Brassicales; Brassicaceae; Camelineae; Arabidopsis	Gene.79131::c30880_g5_i8::g.79131::m.79131	1082-84[-]	PF13426.4^PAS_9^PAS domain^41-131^E:3.8e-15`PF00989.22^PAS^PAS fold^41-127^E:1.6e-05`PF08447.9^PAS_3^PAS fold^43-129^E:2.5e-06`PF13426.4^PAS_9^PAS domain^254-310^E:5.3e-07`PF13188.4^PAS_8^PAS domain^266-290^E:0.3	COG2202^Histidine kinase	KEGG:ath:AT2G02710	GO:0005737^cellular_component^cytoplasm`GO:0000155^molecular_function^phosphorelay sensor kinase activity`GO:0009881^molecular_function^photoreceptor activity`GO:0004674^molecular_function^protein serine/threonine kinase activity`GO:0035556^biological_process^intracellular signal transduction`GO:0006468^biological_process^protein phosphorylation`GO:0018298^biological_process^protein-chromophore l…	GO:0006355^biological_process^regulation of transcription, DNA-templated`GO:0005515^molecular_function^protein binding
c23849_g2_i7	Inf	8.82991174037046e-07	0.000680274989766014	c23849_g2	ATG1T_ARATH^ATG1T_ARATH^Q:1663-1046,H:1-206^61.65%ID^E:6.5e-82^RecName: Full=Serine/threonine-protein kinase ATG1t {ECO:0000305};^Eukaryota; Viridiplantae; Streptophyta; Embryophyta; Tracheophyta; Spermatophyta; Magnoliophyta; eudicotyledons; Gunneridae; Pentapetalae; rosids; malvids; Brassicales; Brassicaceae; Camelineae; Arabidopsis`ATG1T_ARATH^ATG1T_ARATH^Q:1143-853,H:177-277^37.624%ID^E:1.05e…	Gene.20705::c23849_g2_i7::g.20705::m.20705	1663-1025[-]	PF00069.22^Pkinase^Protein kinase domain^9-207^E:1.1e-59`PF07714.14^Pkinase_Tyr^Protein tyrosine kinase^10-206^E:5e-38	ENOG410XR01^Unc51-like kinase	.	GO:0005776^cellular_component^autophagosome`GO:0031410^cellular_component^cytoplasmic vesicle`GO:0005524^molecular_function^ATP binding`GO:0003676^molecular_function^nucleic acid binding`GO:0004674^molecular_function^protein serine/threonine kinase activity`GO:0006914^biological_process^autophagy`GO:0015031^biological_process^protein transport	GO:0004672^molecular_function^protein kinase activity`GO:0005524^molecular_function^ATP binding`GO:0006468^biological_process^protein phosphorylation
c27978_g3_i4	Inf	1.22491023179785e-06	0.000909504723271002	c27978_g3	CADH1_ARATH^CADH1_ARATH^Q:1685-2725,H:10-355^78.098%ID^E:0^RecName: Full=Probable cinnamyl alcohol dehydrogenase 1;^Eukaryota; Viridiplantae; Streptophyta; Embryophyta; Tracheophyta; Spermatophyta; Magnoliophyta; eudicotyledons; Gunneridae; Pentapetalae; rosids; malvids; Brassicales; Brassicaceae; Camelineae; Arabidopsis	Gene.48150::c27978_g3_i4::g.48150::m.48150	1661-2728[+]	PF08240.9^ADH_N^Alcohol dehydrogenase GroES-like domain^35-149^E:1.5e-25`PF00107.23^ADH_zinc_N^Zinc-binding dehydrogenase^192-314^E:8.4e-16`PF13602.3^ADH_zinc_N_2^Zinc-binding dehydrogenase^225-339^E:4.1e-06	COG1064^alcohol dehydrogenase	KEGG:ath:AT1G72680`KO:K00083	GO:0005829^cellular_component^cytosol`GO:0045551^molecular_function^cinnamyl-alcohol dehydrogenase activity`GO:0052747^molecular_function^sinapyl alcohol dehydrogenase activity`GO:0008270^molecular_function^zinc ion binding`GO:0009809^biological_process^lignin biosynthetic process	GO:0055114^biological_process^oxidation-reduction process
c30672_g2_i7	Inf	1.36618767048542e-06	0.000985829477774363	c30672_g2	HTR5B_HUMAN^HTR5B_HUMAN^Q:5226-2854,H:693-1537^25.964%ID^E:2.93e-45^RecName: Full=HEAT repeat-containing protein 5B;^Eukaryota; Metazoa; Chordata; Craniata; Vertebrata; Euteleostomi; Mammalia; Eutheria; Euarchontoglires; Primates; Haplorrhini; Catarrhini; Hominidae; Homo	Gene.76650::c30672_g2_i7::g.76650::m.76650	5043-367[-]	.	ENOG410XP05^HEAT repeat containing	KEGG:hsa:54497	GO:0070062^cellular_component^extracellular exosome`GO:0016020^cellular_component^membrane	.
c22254_g1_i5	Inf	1.36618767048542e-06	0.000985829477774363	c22254_g1	RF2B_ORYSJ^RF2B_ORYSJ^Q:1667-1960,H:115-212^77.551%ID^E:6.13e-26^RecName: Full=Transcription factor RF2b;^Eukaryota; Viridiplantae; Streptophyta; Embryophyta; Tracheophyta; Spermatophyta; Magnoliophyta; Liliopsida; Poales; Poaceae; BOP clade; Oryzoideae; Oryzeae; Oryzinae; Oryza	Gene.14375::c22254_g1_i5::g.14375::m.14375	428-1996[+]	PF07716.12^bZIP_2^Basic region leucine zipper^430-482^E:5.4e-08`PF00170.18^bZIP_1^bZIP transcription factor^433-487^E:1e-08	ENOG4111FX9^Transcription factor	.	GO:0005634^cellular_component^nucleus`GO:0043565^molecular_function^sequence-specific DNA binding`GO:0003700^molecular_function^transcription factor activity, sequence-specific DNA binding`GO:0006351^biological_process^transcription, DNA-templated	GO:0003700^molecular_function^transcription factor activity, sequence-specific DNA binding`GO:0043565^molecular_function^sequence-specific DNA binding`GO:0006355^biological_process^regulation of transcription, DNA-templated
c27346_g1_i4	Inf	1.69964307767051e-06	0.00116882971541333	c27346_g1	CPL3_ARATH^CPL3_ARATH^Q:3506-1248,H:503-1239^56.161%ID^E:0^RecName: Full=RNA polymerase II C-terminal domain phosphatase-like 3;^Eukaryota; Viridiplantae; Streptophyta; Embryophyta; Tracheophyta; Spermatophyta; Magnoliophyta; eudicotyledons; Gunneridae; Pentapetalae; rosids; malvids; Brassicales; Brassicaceae; Camelineae; Arabidopsis`CPL3_ARATH^CPL3_ARATH^Q:4528-4337,H:210-273^54.688%ID^E:3.11e-2…	Gene.42661::c27346_g1_i4::g.42661::m.42661	4205-1239[-]	PF03031.15^NIF^NLI interacting factor-like phosphatase^674-831^E:5.9e-21`PF12738.4^PTCB-BRCT^twin BRCT domain^918-968^E:0.00014	COG5190^CTD (Carboxy-terminal domain, RNA polymerase II, polypeptide A)	KEGG:ath:AT2G33540`KO:K18999	GO:0016591^cellular_component^DNA-directed RNA polymerase II, holoenzyme`GO:0005634^cellular_component^nucleus`GO:0008420^molecular_function^CTD phosphatase activity`GO:0046872^molecular_function^metal ion binding`GO:0008022^molecular_function^protein C-terminus binding`GO:0003723^molecular_function^RNA binding`GO:0070940^biological_process^dephosphorylation of RNA polymerase II C-terminal domain…	.
c28819_g1_i5	Inf	1.89582823848552e-06	0.00127801273871485	c28819_g1	Y4757_DICDI^Y4757_DICDI^Q:816-385,H:608-762^35.443%ID^E:3.21e-16^RecName: Full=OTU domain-containing protein DDB_G0284757;^Eukaryota; Amoebozoa; Mycetozoa; Dictyosteliida; Dictyostelium	Gene.56439::c28819_g1_i5::g.56439::m.56439	1011-310[-]	PF02338.16^OTU^OTU-like cysteine protease^95-181^E:1.1e-09	ENOG4111GFM^OTU-like cysteine protease	KEGG:ddi:DDB_G0284757	GO:0008234^molecular_function^cysteine-type peptidase activity	.
c26811_g1_i1	Inf	2.6314370460086e-06	0.00170653688833112	c26811_g1	RUS2_ARATH^RUS2_ARATH^Q:1597-635,H:113-433^78.816%ID^E:0^RecName: Full=Protein root UVB sensitive 2, chloroplastic {ECO:0000303|PubMed:19515790};^Eukaryota; Viridiplantae; Streptophyta; Embryophyta; Tracheophyta; Spermatophyta; Magnoliophyta; eudicotyledons; Gunneridae; Pentapetalae; rosids; malvids; Brassicales; Brassicaceae; Camelineae; Arabidopsis`RUS2_ARATH^RUS2_ARATH^Q:1899-1591,H:6-108^69.9…	Gene.38430::c26811_g1_i1::g.38430::m.38430	1537-632[-]	PF04884.11^DUF647^Vitamin B6 photo-protection and homoeostasis^2-161^E:3.1e-41	ENOG410XU74^Chromosome 16 open reading frame 58	KEGG:ath:AT2G31190	GO:0009941^cellular_component^chloroplast envelope`GO:0005739^cellular_component^mitochondrion`GO:0009536^cellular_component^plastid`GO:0009926^biological_process^auxin polar transport`GO:0010224^biological_process^response to UV-B	.
c30605_g4_i5	Inf	2.6314370460086e-06	0.00170653688833112	c30605_g4	Y5162_ARATH^Y5162_ARATH^Q:3148-3804,H:193-413^36.199%ID^E:1.2e-27^RecName: Full=Uncharacterized protein At5g41620;^Eukaryota; Viridiplantae; Streptophyta; Embryophyta; Tracheophyta; Spermatophyta; Magnoliophyta; eudicotyledons; Gunneridae; Pentapetalae; rosids; malvids; Brassicales; Brassicaceae; Camelineae; Arabidopsis	Gene.75830::c30605_g4_i5::g.75830::m.75830	2932-4461[+]	.	ENOG410YF2F^intracellular protein transport protein	KEGG:ath:AT5G41620	GO:0009507^cellular_component^chloroplast`GO:0005886^cellular_component^plasma membrane	.
c29679_g2_i5	Inf	2.93549290523291e-06	0.00187992635017247	c29679_g2	TENAC_ARATH^TENAC_ARATH^Q:1365-952,H:475-616^69.718%ID^E:1.41e-43^RecName: Full=Probable aminopyrimidine aminohydrolase, mitochondrial {ECO:0000303|PubMed:25014715};^Eukaryota; Viridiplantae; Streptophyta; Embryophyta; Tracheophyta; Spermatophyta; Magnoliophyta; eudicotyledons; Gunneridae; Pentapetalae; rosids; malvids; Brassicales; Brassicaceae; Camelineae; Arabidopsis	Gene.65763::c29679_g2_i5::g.65763::m.65763	2156-2488[+]	.	.	.	.	.
c27700_g2_i3	Inf	3.27476971859663e-06	0.00200929673045343	c27700_g2	AB35G_ARATH^AB35G_ARATH^Q:2183-3685,H:871-1371^30.291%ID^E:2e-59^RecName: Full=ABC transporter G family member 35;^Eukaryota; Viridiplantae; Streptophyta; Embryophyta; Tracheophyta; Spermatophyta; Magnoliophyta; eudicotyledons; Gunneridae; Pentapetalae; rosids; malvids; Brassicales; Brassicaceae; Camelineae; Arabidopsis`AB35G_ARATH^AB35G_ARATH^Q:2171-3697,H:184-729^21.925%ID^E:3.02e-11^RecName: F…	Gene.45590::c27700_g2_i3::g.45590::m.45590	2210-3745[+]	PF01061.21^ABC2_membrane^ABC-2 type transporter^291-498^E:6.4e-26	COG0842^(ABC) transporter	KEGG:ath:AT1G15210	GO:0009507^cellular_component^chloroplast`GO:0016021^cellular_component^integral component of membrane`GO:0016020^cellular_component^membrane`GO:0005886^cellular_component^plasma membrane`GO:0005524^molecular_function^ATP binding`GO:0042626^molecular_function^ATPase activity, coupled to transmembrane movement of substances`GO:0006855^biological_process^drug transmembrane transport	GO:0016020^cellular_component^membrane
c30722_g1_i16	Inf	3.27476971859663e-06	0.00200929673045343	c30722_g1	PIGU_CRIGR^PIGU_CRIGR^Q:479-1564,H:80-416^31.733%ID^E:1.38e-27^RecName: Full=Phosphatidylinositol glycan anchor biosynthesis class U protein;^Eukaryota; Metazoa; Chordata; Craniata; Vertebrata; Euteleostomi; Mammalia; Eutheria; Euarchontoglires; Glires; Rodentia; Sciurognathi; Muroidea; Cricetidae; Cricetinae; Cricetulus	Gene.77213::c30722_g1_i16::g.77213::m.77213	518-1591[+]	PF06728.10^PIG-U^GPI transamidase subunit PIG-U^10-327^E:3.5e-89	ENOG410XST9^phosphatidylinositol glycan anchor biosynthesis class U	KEGG:hsa:128869`KO:K05293	GO:0005789^cellular_component^endoplasmic reticulum membrane`GO:0042765^cellular_component^GPI-anchor transamidase complex`GO:0030176^cellular_component^integral component of endoplasmic reticulum membrane`GO:0016020^cellular_component^membrane`GO:0005886^cellular_component^plasma membrane`GO:0016255^biological_process^attachment of GPI anchor to protein`GO:0006501^biological_process^C-terminal p…	GO:0006506^biological_process^GPI anchor biosynthetic process`GO:0016021^cellular_component^integral component of membrane
c27711_g2_i7	Inf	3.27476971859663e-06	0.00200929673045343	c27711_g2	GOGC5_ARATH^GOGC5_ARATH^Q:1074-2474,H:490-956^81.799%ID^E:4.66e-180^RecName: Full=Golgin candidate 5;^Eukaryota; Viridiplantae; Streptophyta; Embryophyta; Tracheophyta; Spermatophyta; Magnoliophyta; eudicotyledons; Gunneridae; Pentapetalae; rosids; malvids; Brassicales; Brassicaceae; Camelineae; Arabidopsis`GOGC5_ARATH^GOGC5_ARATH^Q:15-788,H:234-488^60.385%ID^E:5.13e-67^RecName: Full=Golgin candi…	Gene.45680::c27711_g2_i7::g.45680::m.45680	1299-2504[+]	PF12325.5^TMF_TATA_bd^TATA element modulatory factor 1 TATA binding^277-387^E:7e-32	ENOG410Y3EG^golgin candidate	KEGG:ath:AT1G79830	GO:0005794^cellular_component^Golgi apparatus	.
c26302_g1_i6	Inf	3.65335747142535e-06	0.00218915161793608	c26302_g1	CAPP1_SOYBN^CAPP1_SOYBN^Q:2785-443,H:187-967^90.038%ID^E:0^RecName: Full=Phosphoenolpyruvate carboxylase, housekeeping isozyme;^Eukaryota; Viridiplantae; Streptophyta; Embryophyta; Tracheophyta; Spermatophyta; Magnoliophyta; eudicotyledons; Gunneridae; Pentapetalae; rosids; fabids; Fabales; Fabaceae; Papilionoideae; Phaseoleae; Glycine; Soja	Gene.34523::c26302_g1_i6::g.34523::m.34523	2806-440[-]	PF00311.14^PEPcase^Phosphoenolpyruvate carboxylase^6-788^E:7.1e-295	COG2352^phosphoenolpyruvate carboxylase activity	KEGG:gmx:547769`KO:K01595	GO:0005737^cellular_component^cytoplasm`GO:0008964^molecular_function^phosphoenolpyruvate carboxylase activity`GO:0015977^biological_process^carbon fixation`GO:0015979^biological_process^photosynthesis`GO:0006099^biological_process^tricarboxylic acid cycle	GO:0008964^molecular_function^phosphoenolpyruvate carboxylase activity`GO:0006099^biological_process^tricarboxylic acid cycle`GO:0015977^biological_process^carbon fixation
c30939_g1_i1	Inf	4.5472617839489e-06	0.0026030152287939	c30939_g1	PHYA_ARATH^PHYA_ARATH^Q:6005-2856,H:71-1122^83.571%ID^E:0^RecName: Full=Phytochrome A;^Eukaryota; Viridiplantae; Streptophyta; Embryophyta; Tracheophyta; Spermatophyta; Magnoliophyta; eudicotyledons; Gunneridae; Pentapetalae; rosids; malvids; Brassicales; Brassicaceae; Camelineae; Arabidopsis	Gene.79840::c30939_g1_i1::g.79840::m.79840	6026-2832[-]	PF08446.8^PAS_2^PAS fold^11-121^E:2.7e-37`PF01590.23^GAF^GAF domain^154-336^E:1.1e-33`PF00360.17^PHY^Phytochrome region^348-523^E:2.7e-60`PF00989.22^PAS^PAS fold^555-670^E:4.3e-21`PF13188.4^PAS_8^PAS domain^559-605^E:0.24`PF08448.7^PAS_4^PAS fold^563-674^E:1e-06`PF13426.4^PAS_9^PAS domain^566-671^E:0.0037`PF00989.22^PAS^PAS fold^686-808^E:9.6e-23`PF13426.4^PAS_9^PAS domain^702-807^E:0.042`PF02518…	.	.	GO:0005622^cellular_component^intracellular`GO:0000155^molecular_function^phosphorelay sensor kinase activity`GO:0009881^molecular_function^photoreceptor activity`GO:0009584^biological_process^detection of visible light`GO:0018298^biological_process^protein-chromophore linkage`GO:0017006^biological_process^protein-tetrapyrrole linkage`GO:0009585^biological_process^red, far-red light phototransduc…	GO:0006355^biological_process^regulation of transcription, DNA-templated`GO:0005515^molecular_function^protein binding`GO:0009584^biological_process^detection of visible light`GO:0018298^biological_process^protein-chromophore linkage
c29675_g1_i4	Inf	5.07336751621189e-06	0.00288804264397871	c29675_g1	MURB_PARUW^MURB_PARUW^Q:2137-1685,H:50-198^51.656%ID^E:7.05e-56^RecName: Full=UDP-N-acetylenolpyruvoylglucosamine reductase {ECO:0000255|HAMAP-Rule:MF_00037};^Bacteria; Chlamydiae; Chlamydiales; Parachlamydiaceae; Candidatus Protochlamydia`MURB_PARUW^MURB_PARUW^Q:1589-1311,H:205-294^48.387%ID^E:7.05e-56^RecName: Full=UDP-N-acetylenolpyruvoylglucosamine reductase {ECO:0000255|HAMAP-Rule:MF_00037};…	Gene.65678::c29675_g1_i4::g.65678::m.65678	384-1085[+]	PF14108.3^DUF4281^Domain of unknown function (DUF4281)^96-223^E:7.9e-39	.	.	.	.
c24033_g4_i2	Inf	6.31573578030063e-06	0.00349809828359072	c24033_g4	RAA1F_ARATH^RAA1F_ARATH^Q:282-929,H:1-216^91.667%ID^E:4.9e-146^RecName: Full=Ras-related protein RABA1f;^Eukaryota; Viridiplantae; Streptophyta; Embryophyta; Tracheophyta; Spermatophyta; Magnoliophyta; eudicotyledons; Gunneridae; Pentapetalae; rosids; malvids; Brassicales; Brassicaceae; Camelineae; Arabidopsis	Gene.21711::c24033_g4_i2::g.21711::m.21711	282-935[+]	PF00025.18^Arf^ADP-ribosylation factor family^14-145^E:1.2e-12`PF00071.19^Ras^Ras family^15-175^E:5.1e-63`PF08477.10^Roc^Ras of Complex, Roc, domain of DAPkinase^15-129^E:4.4e-35`PF01926.20^MMR_HSR1^50S ribosome-binding GTPase^15-122^E:5.6e-07`PF05783.8^DLIC^Dynein light intermediate chain (DLIC)^15-149^E:0.0085	COG1100^GTP-binding Protein	KEGG:ath:AT5G60860	GO:0005622^cellular_component^intracellular`GO:0005886^cellular_component^plasma membrane`GO:0005525^molecular_function^GTP binding`GO:0015031^biological_process^protein transport`GO:0007264^biological_process^small GTPase mediated signal transduction	GO:0005525^molecular_function^GTP binding`GO:0007264^biological_process^small GTPase mediated signal transduction
c26323_g2_i5	Inf	6.31573578030063e-06	0.00349809828359072	c26323_g2	C3H18_ARATH^C3H18_ARATH^Q:420-2159,H:1-535^53.288%ID^E:3.88e-162^RecName: Full=Zinc finger CCCH domain-containing protein 18;^Eukaryota; Viridiplantae; Streptophyta; Embryophyta; Tracheophyta; Spermatophyta; Magnoliophyta; eudicotyledons; Gunneridae; Pentapetalae; rosids; malvids; Brassicales; Brassicaceae; Camelineae; Arabidopsis	Gene.34661::c26323_g2_i5::g.34661::m.34661	420-2165[+]	PF12872.4^OST-HTH^OST-HTH/LOTUS domain^245-324^E:1.3e-14`PF00076.19^RRM_1^RNA recognition motif. (a.k.a. RRM, RBD, or RNP domain)^362-408^E:3.9e-07	ENOG410YDMG^zinc finger CCCH domain-containing protein	KEGG:ath:AT2G05160	GO:0003677^molecular_function^DNA binding`GO:0046872^molecular_function^metal ion binding`GO:0004518^molecular_function^nuclease activity`GO:0000166^molecular_function^nucleotide binding`GO:0003723^molecular_function^RNA binding	GO:0003676^molecular_function^nucleic acid binding
c26722_g1_i10	Inf	7.04701496233567e-06	0.00382336333671241	c26722_g1	CPL2_ARATH^CPL2_ARATH^Q:32-1159,H:371-766^51.597%ID^E:2.39e-109^RecName: Full=RNA polymerase II C-terminal domain phosphatase-like 2;^Eukaryota; Viridiplantae; Streptophyta; Embryophyta; Tracheophyta; Spermatophyta; Magnoliophyta; eudicotyledons; Gunneridae; Pentapetalae; rosids; malvids; Brassicales; Brassicaceae; Camelineae; Arabidopsis	Gene.37702::c26722_g1_i10::g.37702::m.37702	2-1219[+]	PF00035.23^dsrm^Double-stranded RNA binding motif^278-340^E:2.1e-10	COG5190^CTD (Carboxy-terminal domain, RNA polymerase II, polypeptide A)	.	GO:0005737^cellular_component^cytoplasm`GO:0005634^cellular_component^nucleus`GO:0046872^molecular_function^metal ion binding`GO:0004721^molecular_function^phosphoprotein phosphatase activity`GO:0004647^molecular_function^phosphoserine phosphatase activity`GO:0003723^molecular_function^RNA binding`GO:0009734^biological_process^auxin-activated signaling pathway`GO:0016311^biological_process^dephos…	.
c25621_g4_i2	Inf	7.04701496233567e-06	0.00382336333671241	c25621_g4	RNG1A_ARATH^RNG1A_ARATH^Q:750-1604,H:223-521^50.831%ID^E:1.01e-68^RecName: Full=Putative E3 ubiquitin-protein ligase RING1a;^Eukaryota; Viridiplantae; Streptophyta; Embryophyta; Tracheophyta; Spermatophyta; Magnoliophyta; eudicotyledons; Gunneridae; Pentapetalae; rosids; malvids; Brassicales; Brassicaceae; Camelineae; Arabidopsis`RNG1A_ARATH^RNG1A_ARATH^Q:52-222,H:169-225^77.193%ID^E:3.57e-13^Rec…	Gene.30200::c25621_g4_i2::g.30200::m.30200	840-1610[+]	.	.	.	GO:0005634^cellular_component^nucleus`GO:0035102^cellular_component^PRC1 complex`GO:0016874^molecular_function^ligase activity`GO:0008270^molecular_function^zinc ion binding`GO:0001709^biological_process^cell fate determination`GO:0016568^biological_process^chromatin modification`GO:0010076^biological_process^maintenance of floral meristem identity`GO:0010077^biological_process^maintenance of inf…	.
c28961_g1_i8	Inf	7.86317672010725e-06	0.00417465422695601	c28961_g1	.	Gene.58090::c28961_g1_i8::g.58090::m.58090	2787-487[-]	PF08302.8^tRNA_lig_CPD^Fungal tRNA ligase phosphodiesterase domain^684-745^E:1.7e-05	.	.	.	GO:0003972^molecular_function^RNA ligase (ATP) activity`GO:0005524^molecular_function^ATP binding`GO:0006388^biological_process^tRNA splicing, via endonucleolytic cleavage and ligation
c24821_g1_i3	Inf	7.86317672010725e-06	0.00417465422695601	c24821_g1	SIA2_ARATH^SIA2_ARATH^Q:2007-1279,H:21-264^80.328%ID^E:2.04e-153^RecName: Full=Sialyltransferase-like protein 2 {ECO:0000303|PubMed:24825296};^Eukaryota; Viridiplantae; Streptophyta; Embryophyta; Tracheophyta; Spermatophyta; Magnoliophyta; eudicotyledons; Gunneridae; Pentapetalae; rosids; malvids; Brassicales; Brassicaceae; Camelineae; Arabidopsis`SIA2_ARATH^SIA2_ARATH^Q:1291-1076,H:273-344^93.05…	Gene.25591::c24821_g1_i3::g.25591::m.25591	2067-1105[-]	PF00777.15^Glyco_transf_29^Glycosyltransferase family 29 (sialyltransferase)^145-246^E:2.2e-21	ENOG410XT8P^ST3 beta-galactoside alpha-2,3-sialyltransferase	KEGG:ath:AT3G48820	GO:0005768^cellular_component^endosome`GO:0005794^cellular_component^Golgi apparatus`GO:0000139^cellular_component^Golgi membrane`GO:0016021^cellular_component^integral component of membrane`GO:0005802^cellular_component^trans-Golgi network`GO:0016757^molecular_function^transferase activity, transferring glycosyl groups`GO:0009311^biological_process^oligosaccharide metabolic process`GO:0018279^bi…	GO:0008373^molecular_function^sialyltransferase activity`GO:0006486^biological_process^protein glycosylation
c26710_g3_i4	Inf	7.86317672010725e-06	0.00417465422695601	c26710_g3	ARFA_ORYSJ^ARFA_ORYSJ^Q:560-1171,H:2-207^66.019%ID^E:3.38e-142^RecName: Full=Auxin response factor 1;^Eukaryota; Viridiplantae; Streptophyta; Embryophyta; Tracheophyta; Spermatophyta; Magnoliophyta; Liliopsida; Poales; Poaceae; BOP clade; Oryzoideae; Oryzeae; Oryzinae; Oryza`ARFA_ORYSJ^ARFA_ORYSJ^Q:1267-1746,H:210-373^62.195%ID^E:3.38e-142^RecName: Full=Auxin response factor 1;^Eukaryota; Viridip…	Gene.37585::c26710_g3_i4::g.37585::m.37585	533-1183[+]	PF02362.18^B3^B3 DNA binding domain^128-215^E:4.3e-20	ENOG410YECH^auxin response factor	KEGG:ath:AT2G46530	GO:0005634^cellular_component^nucleus`GO:0009506^cellular_component^plasmodesma`GO:0003677^molecular_function^DNA binding`GO:0003700^molecular_function^transcription factor activity, sequence-specific DNA binding`GO:0009734^biological_process^auxin-activated signaling pathway`GO:0006351^biological_process^transcription, DNA-templated	GO:0003677^molecular_function^DNA binding
c25082_g5_i4	Inf	8.77409775435564e-06	0.00459563904156979	c25082_g5	AHL1_ARATH^AHL1_ARATH^Q:2272-2709,H:226-355^53.691%ID^E:1.28e-24^RecName: Full=AT-hook motif nuclear-localized protein 1 {ECO:0000303|PubMed:15604740};^Eukaryota; Viridiplantae; Streptophyta; Embryophyta; Tracheophyta; Spermatophyta; Magnoliophyta; eudicotyledons; Gunneridae; Pentapetalae; rosids; malvids; Brassicales; Brassicaceae; Camelineae; Arabidopsis`AHL1_ARATH^AHL1_ARATH^Q:1863-1997,H:181-…	Gene.26992::c25082_g5_i4::g.26992::m.26992	1058-1549[+]	PF02178.16^AT_hook^AT hook motif^55-66^E:0.048	ENOG410YFD3^AT hook motif domain containing protein, expressed	KEGG:ath:AT4G12080	GO:0098687^cellular_component^chromosomal region`GO:0005737^cellular_component^cytoplasm`GO:0005739^cellular_component^mitochondrion`GO:0005730^cellular_component^nucleolus`GO:0005654^cellular_component^nucleoplasm`GO:0005634^cellular_component^nucleus`GO:0003680^molecular_function^AT DNA binding`GO:0003677^molecular_function^DNA binding`GO:0043565^molecular_function^sequence-specific DNA binding…	GO:0003677^molecular_function^DNA binding
c31334_g1_i2	Inf	8.77409775435564e-06	0.00459563904156979	c31334_g1	TPPII_ARATH^TPPII_ARATH^Q:2238-3704,H:325-813^78.119%ID^E:0^RecName: Full=Tripeptidyl-peptidase 2;^Eukaryota; Viridiplantae; Streptophyta; Embryophyta; Tracheophyta; Spermatophyta; Magnoliophyta; eudicotyledons; Gunneridae; Pentapetalae; rosids; malvids; Brassicales; Brassicaceae; Camelineae; Arabidopsis`TPPII_ARATH^TPPII_ARATH^Q:3761-5542,H:807-1380^66.387%ID^E:0^RecName: Full=Tripeptidyl-peptid…	Gene.84109::c31334_g1_i2::g.84109::m.84109	3716-5545[+]	PF12580.5^TPPII^Tripeptidyl peptidase II^107-292^E:6.1e-62	COG1404^peptidase (S8 and S53, subtilisin, kexin, sedolisin	KEGG:ath:AT4G20850`KO:K01280	GO:0009507^cellular_component^chloroplast`GO:0005737^cellular_component^cytoplasm`GO:0022626^cellular_component^cytosolic ribosome`GO:0016020^cellular_component^membrane`GO:0005774^cellular_component^vacuolar membrane`GO:0005773^cellular_component^vacuole`GO:0004177^molecular_function^aminopeptidase activity`GO:0004252^molecular_function^serine-type endopeptidase activity`GO:0008240^molecular_fun…	.
c31099_g1_i2	Inf	9.7908067327989e-06	0.00509251168874605	c31099_g1	SYS_HELAN^SYS_HELAN^Q:168-953,H:1-262^78.626%ID^E:2.01e-141^RecName: Full=Serine--tRNA ligase;^Eukaryota; Viridiplantae; Streptophyta; Embryophyta; Tracheophyta; Spermatophyta; Magnoliophyta; eudicotyledons; Gunneridae; Pentapetalae; asterids; campanulids; Asterales; Asteraceae; Asteroideae; Heliantheae alliance; Heliantheae; Helianthus`SYS_HELAN^SYS_HELAN^Q:937-1167,H:269-346^73.077%ID^E:2.01e-1…	Gene.81449::c31099_g1_i2::g.81449::m.81449	168-959[+]	PF02403.19^Seryl_tRNA_N^Seryl-tRNA synthetase N-terminal domain^1-112^E:7.4e-26	.	.	GO:0005737^cellular_component^cytoplasm`GO:0005524^molecular_function^ATP binding`GO:0004828^molecular_function^serine-tRNA ligase activity`GO:0097056^biological_process^selenocysteinyl-tRNA(Sec) biosynthetic process`GO:0006434^biological_process^seryl-tRNA aminoacylation	.
c23211_g1_i1	Inf	1.09256189605991e-05	0.00554210134859775	c23211_g1	PP232_ARATH^PP232_ARATH^Q:421-2139,H:4-578^33.218%ID^E:1.71e-104^RecName: Full=Putative pentatricopeptide repeat-containing protein At3g15130;^Eukaryota; Viridiplantae; Streptophyta; Embryophyta; Tracheophyta; Spermatophyta; Magnoliophyta; eudicotyledons; Gunneridae; Pentapetalae; rosids; malvids; Brassicales; Brassicaceae; Camelineae; Arabidopsis	Gene.17962::c23211_g1_i1::g.17962::m.17962	337-2124[+]	PF01535.17^PPR^PPR repeat^70-97^E:0.0047`PF01535.17^PPR^PPR repeat^98-127^E:5e-06`PF01535.17^PPR^PPR repeat^173-199^E:0.038`PF13041.3^PPR_2^PPR repeat family^199-246^E:5.4e-09`PF01535.17^PPR^PPR repeat^202-218^E:0.59`PF01535.17^PPR^PPR repeat^274-300^E:0.0012`PF13812.3^PPR_3^Pentatricopeptide repeat domain^299-341^E:0.0073`PF13041.3^PPR_2^PPR repeat family^300-347^E:3.2e-08`PF01535.17^PPR^PPR rep…	ENOG410Z7Z7^Pentatricopeptide repeat-containing protein	KEGG:ath:AT3G15130	.	.
c29144_g1_i4	Inf	1.21922868293933e-05	0.00609412127932006	c29144_g1	HOS1_ARATH^HOS1_ARATH^Q:932-3025,H:207-872^51.571%ID^E:0^RecName: Full=E3 ubiquitin-protein ligase HOS1;^Eukaryota; Viridiplantae; Streptophyta; Embryophyta; Tracheophyta; Spermatophyta; Magnoliophyta; eudicotyledons; Gunneridae; Pentapetalae; rosids; malvids; Brassicales; Brassicaceae; Camelineae; Arabidopsis`HOS1_ARATH^HOS1_ARATH^Q:184-813,H:1-205^67.143%ID^E:0^RecName: Full=E3 ubiquitin-protei…	Gene.60130::c29144_g1_i4::g.60130::m.60130	950-3064[+]	PF13934.3^ELYS^Nuclear pore complex assembly^112-387^E:3.8e-60	ENOG4110YTD^e3 ubiquitin-protein ligase	KEGG:ath:AT2G39810`KO:K16278	GO:0005737^cellular_component^cytoplasm`GO:0005634^cellular_component^nucleus`GO:0016874^molecular_function^ligase activity`GO:0046872^molecular_function^metal ion binding`GO:0004842^molecular_function^ubiquitin-protein transferase activity`GO:0045892^biological_process^negative regulation of transcription, DNA-templated`GO:0016567^biological_process^protein ubiquitination`GO:0009966^biological_p…	.
c26057_g1_i5	Inf	1.21922868293933e-05	0.00609412127932006	c26057_g1	.	.	.	.	.	.	.	.
c27652_g2_i2	Inf	1.21922868293933e-05	0.00609412127932006	c27652_g2	JMJ25_ARATH^JMJ25_ARATH^Q:1467-88,H:417-806^34.402%ID^E:2.27e-62^RecName: Full=Lysine-specific demethylase JMJ25;^Eukaryota; Viridiplantae; Streptophyta; Embryophyta; Tracheophyta; Spermatophyta; Magnoliophyta; eudicotyledons; Gunneridae; Pentapetalae; rosids; malvids; Brassicales; Brassicaceae; Camelineae; Arabidopsis`JMJ25_ARATH^JMJ25_ARATH^Q:2076-1633,H:167-314^37.419%ID^E:4.3e-15^RecName: Ful…	Gene.45161::c27652_g2_i2::g.45161::m.45161	2784-46[-]	PF08879.7^WRC^WRC^11-52^E:7.9e-16	ENOG410XTAA^lysine (K)-specific demethylase	.	GO:0005634^cellular_component^nucleus`GO:0051213^molecular_function^dioxygenase activity`GO:0032454^molecular_function^histone demethylase activity (H3-K9 specific)`GO:0046872^molecular_function^metal ion binding`GO:0033169^biological_process^histone H3-K9 demethylation`GO:0060969^biological_process^negative regulation of gene silencing`GO:0006355^biological_process^regulation of transcription, D…	.
c28854_g4_i5	Inf	1.3606167897433e-05	0.00673487642798086	c28854_g4	MORC4_HUMAN^MORC4_HUMAN^Q:1888-551,H:37-468^30.108%ID^E:1.92e-41^RecName: Full=MORC family CW-type zinc finger protein 4;^Eukaryota; Metazoa; Chordata; Craniata; Vertebrata; Euteleostomi; Mammalia; Eutheria; Euarchontoglires; Primates; Haplorrhini; Catarrhini; Hominidae; Homo	Gene.56765::c28854_g4_i5::g.56765::m.56765	2152-398[-]	PF13589.3^HATPase_c_3^Histidine kinase-, DNA gyrase B-, and HSP90-like ATPase^105-225^E:3.2e-20`PF02518.23^HATPase_c^Histidine kinase-, DNA gyrase B-, and HSP90-like ATPase^106-182^E:4.3e-06`PF07496.12^zf-CW^CW-type Zinc Finger^493-534^E:2.9e-10	ENOG411033B^MORC family CW-type zinc finger	KEGG:hsa:23515	GO:0005654^cellular_component^nucleoplasm`GO:0016605^cellular_component^PML body`GO:0008270^molecular_function^zinc ion binding`GO:0007569^biological_process^cell aging`GO:0051457^biological_process^maintenance of protein location in nucleus`GO:0048147^biological_process^negative regulation of fibroblast proliferation`GO:0018105^biological_process^peptidyl-serine phosphorylation`GO:0006468^biolog…	GO:0008270^molecular_function^zinc ion binding
c29294_g1_i2	Inf	1.3606167897433e-05	0.00673487642798086	c29294_g1	MED12_ARATH^MED12_ARATH^Q:6794-567,H:208-2235^57.977%ID^E:0^RecName: Full=Mediator of RNA polymerase II transcription subunit 12;^Eukaryota; Viridiplantae; Streptophyta; Embryophyta; Tracheophyta; Spermatophyta; Magnoliophyta; eudicotyledons; Gunneridae; Pentapetalae; rosids; malvids; Brassicales; Brassicaceae; Camelineae; Arabidopsis`MED12_ARATH^MED12_ARATH^Q:7506-6829,H:1-223^76.106%ID^E:1.18e-…	Gene.61668::c29294_g1_i2::g.61668::m.61668	6722-564[-]	.	.	KEGG:ath:AT4G00450	GO:0016592^cellular_component^mediator complex`GO:0001104^molecular_function^RNA polymerase II transcription cofactor activity`GO:0007275^biological_process^multicellular organism development`GO:0040008^biological_process^regulation of growth`GO:0006351^biological_process^transcription, DNA-templated	.
c26029_g2_i2	Inf	1.51844126712894e-05	0.00730462924308138	c26029_g2	ZDH15_ARATH^ZDH15_ARATH^Q:170-919,H:1-234^63.386%ID^E:3.32e-77^RecName: Full=Probable protein S-acyltransferase 12;^Eukaryota; Viridiplantae; Streptophyta; Embryophyta; Tracheophyta; Spermatophyta; Magnoliophyta; eudicotyledons; Gunneridae; Pentapetalae; rosids; malvids; Brassicales; Brassicaceae; Camelineae; Arabidopsis`ZDH15_ARATH^ZDH15_ARATH^Q:1347-1532,H:228-289^69.355%ID^E:3.26e-20^RecName: …	Gene.32668::c26029_g2_i2::g.32668::m.32668	164-985[+]	PF01529.17^zf-DHHC^DHHC palmitoyltransferase^129-251^E:7.5e-35	COG5273^Zinc finger, DHHC-type containing	KEGG:ath:AT4G00840	GO:0016021^cellular_component^integral component of membrane`GO:0005886^cellular_component^plasma membrane`GO:0019706^molecular_function^protein-cysteine S-palmitoyltransferase activity`GO:0008270^molecular_function^zinc ion binding	GO:0008270^molecular_function^zinc ion binding
c21778_g1_i1	Inf	1.69461744031777e-05	0.00800187422302309	c21778_g1	EBS_ARATH^EBS_ARATH^Q:3336-2722,H:1-170^67.606%ID^E:7.59e-90^RecName: Full=Chromatin remodeling protein EBS {ECO:0000305};^Eukaryota; Viridiplantae; Streptophyta; Embryophyta; Tracheophyta; Spermatophyta; Magnoliophyta; eudicotyledons; Gunneridae; Pentapetalae; rosids; malvids; Brassicales; Brassicaceae; Camelineae; Arabidopsis`EBS_ARATH^EBS_ARATH^Q:956-855,H:184-217^58.824%ID^E:1.14e-06^RecName:…	Gene.12809::c21778_g1_i1::g.12809::m.12809	3336-2917[-]	PF01426.15^BAH^BAH domain^23-135^E:1.5e-24	.	KEGG:ath:AT4G22140	GO:0000785^cellular_component^chromatin`GO:0005677^cellular_component^chromatin silencing complex`GO:0005634^cellular_component^nucleus`GO:0003682^molecular_function^chromatin binding`GO:0035064^molecular_function^methylated histone binding`GO:0000976^molecular_function^transcription regulatory region sequence-specific DNA binding`GO:0008270^molecular_function^zinc ion binding`GO:0016568^biologic…	GO:0003682^molecular_function^chromatin binding
c30604_g3_i6	Inf	1.89128434902495e-05	0.00880874282305411	c30604_g3	ATG9_ARATH^ATG9_ARATH^Q:5531-2943,H:1-864^67.607%ID^E:0^RecName: Full=Autophagy-related protein 9 {ECO:0000303|PubMed:12114572};^Eukaryota; Viridiplantae; Streptophyta; Embryophyta; Tracheophyta; Spermatophyta; Magnoliophyta; eudicotyledons; Gunneridae; Pentapetalae; rosids; malvids; Brassicales; Brassicaceae; Camelineae; Arabidopsis	Gene.75810::c30604_g3_i6::g.75810::m.75810	5531-2925[-]	PF04109.13^APG9^Autophagy protein Apg9^202-565^E:5.5e-132	ENOG410XQBE^Involved in autophagy and cytoplasm to vacuole transport (Cvt) vesicle formation. Plays a key role in the organization of the preautophagosomal structure phagophore assembly site (PAS), the nucleating site for formation of the sequestering vesicle. Cycles between the PAS and the cytoplasmic vesicle pool and may participate in supplying membrane for the growing autophagosome	KEGG:ath:AT2G31260`KO:K17907	GO:0005776^cellular_component^autophagosome`GO:0000421^cellular_component^autophagosome membrane`GO:0031410^cellular_component^cytoplasmic vesicle`GO:0016021^cellular_component^integral component of membrane`GO:0000407^cellular_component^pre-autophagosomal structure`GO:0000045^biological_process^autophagosome assembly`GO:0006914^biological_process^autophagy`GO:0050832^biological_process^defense r…	.
c29002_g3_i5	Inf	1.89128434902495e-05	0.00880874282305411	c29002_g3	DTX46_ARATH^DTX46_ARATH^Q:2088-1537,H:372-555^60.87%ID^E:7.84e-106^RecName: Full=Protein DETOXIFICATION 46, chloroplastic {ECO:0000303|PubMed:11739388};^Eukaryota; Viridiplantae; Streptophyta; Embryophyta; Tracheophyta; Spermatophyta; Magnoliophyta; eudicotyledons; Gunneridae; Pentapetalae; rosids; malvids; Brassicales; Brassicaceae; Camelineae; Arabidopsis`DTX46_ARATH^DTX46_ARATH^Q:2522-2175,H:2…	Gene.58632::c29002_g3_i5::g.58632::m.58632	2-769[+]	PF01985.18^CRS1_YhbY^CRS1 / YhbY (CRM) domain^120-206^E:2.1e-16	COG1534^Rna-binding protein	KEGG:bsu:BSU25650`KO:K07574	GO:0003723^molecular_function^RNA binding	GO:0003723^molecular_function^RNA binding
c23876_g3_i6	Inf	2.11083093665892e-05	0.009570283307774	c23876_g3	Y3972_ARATH^Y3972_ARATH^Q:2230-2562,H:39-148^71.171%ID^E:9.62e-43^RecName: Full=Uncharacterized protein At3g49720;^Eukaryota; Viridiplantae; Streptophyta; Embryophyta; Tracheophyta; Spermatophyta; Magnoliophyta; eudicotyledons; Gunneridae; Pentapetalae; rosids; malvids; Brassicales; Brassicaceae; Camelineae; Arabidopsis	Gene.20812::c23876_g3_i6::g.20812::m.20812	1318-602[-]	PF00226.28^DnaJ^DnaJ domain^174-235^E:7.8e-13	COG0484^ATP binding to DnaK triggers the release of the substrate protein, thus completing the reaction cycle. Several rounds of ATP-dependent interactions between DnaJ, DnaK and GrpE are required for fully efficient folding. Also involved, together with DnaK and GrpE, in the DNA replication of plasmids through activation of initiation proteins (By similarity)	KEGG:mpa:MAP2162c`KO:K03686	GO:0005737^cellular_component^cytoplasm`GO:0005524^molecular_function^ATP binding`GO:0008270^molecular_function^zinc ion binding`GO:0006260^biological_process^DNA replication`GO:0006457^biological_process^protein folding`GO:0009408^biological_process^response to heat	.
c30681_g2_i5	Inf	2.11083093665892e-05	0.009570283307774	c30681_g2	XPO4_MOUSE^XPO4_MOUSE^Q:257-2068,H:547-1148^26.389%ID^E:9.67e-51^RecName: Full=Exportin-4;^Eukaryota; Metazoa; Chordata; Craniata; Vertebrata; Euteleostomi; Mammalia; Eutheria; Euarchontoglires; Glires; Rodentia; Sciurognathi; Muroidea; Muridae; Murinae; Mus; Mus	Gene.76762::c30681_g2_i5::g.76762::m.76762	203-2080[+]	PF08767.8^CRM1_C^CRM1 C terminal^399-489^E:4.6e-05	.	KEGG:xla:734704	GO:0005737^cellular_component^cytoplasm`GO:0005634^cellular_component^nucleus`GO:0015031^biological_process^protein transport	.
c27573_g2_i12	Inf	2.35592531189162e-05	0.0104274713878645	c27573_g2	GATA_SULSY^GATA_SULSY^Q:1470-2765,H:7-485^29.065%ID^E:6.53e-51^RecName: Full=Glutamyl-tRNA(Gln) amidotransferase subunit A {ECO:0000255|HAMAP-Rule:MF_00120};^Bacteria; Aquificae; Aquificales; Hydrogenothermaceae; Sulfurihydrogenibium	Gene.44515::c27573_g2_i12::g.44515::m.44515	1122-2840[+]	PF01425.18^Amidase^Amidase^134-377^E:6.3e-60	COG0154^Allows the formation of correctly charged Gln-tRNA(Gln) through the transamidation of misacylated Glu-tRNA(Gln) in organisms which lack glutaminyl-tRNA synthetase. The reaction takes place in the presence of glutamine and ATP through an activated gamma-phospho-Glu-tRNA(Gln) (By similarity)	KEGG:sul:SYO3AOP1_0487`KO:K02433	GO:0005524^molecular_function^ATP binding`GO:0050567^molecular_function^glutaminyl-tRNA synthase (glutamine-hydrolyzing) activity`GO:0006412^biological_process^translation	.
c30051_g2_i2	Inf	2.62954744373664e-05	0.0112266336820799	c30051_g2	CTR1_ARATH^CTR1_ARATH^Q:1540-821,H:574-813^75%ID^E:8.38e-114^RecName: Full=Serine/threonine-protein kinase CTR1 {ECO:0000303|PubMed:8431946};^Eukaryota; Viridiplantae; Streptophyta; Embryophyta; Tracheophyta; Spermatophyta; Magnoliophyta; eudicotyledons; Gunneridae; Pentapetalae; rosids; malvids; Brassicales; Brassicaceae; Camelineae; Arabidopsis`CTR1_ARATH^CTR1_ARATH^Q:3352-2048,H:161-572^50.452…	Gene.69475::c30051_g2_i2::g.69475::m.69475	3406-2027[-]	PF14381.3^EDR1^Ethylene-responsive protein kinase Le-CTR1^62-266^E:2.1e-72	COG0515^Serine Threonine protein kinase	KEGG:ath:AT5G03730`KO:K14510	GO:0005789^cellular_component^endoplasmic reticulum membrane`GO:0005524^molecular_function^ATP binding`GO:0004674^molecular_function^protein serine/threonine kinase activity`GO:0004712^molecular_function^protein serine/threonine/tyrosine kinase activity`GO:0071281^biological_process^cellular response to iron ion`GO:0009873^biological_process^ethylene-activated signaling pathway`GO:0009686^biologi…	.
c23605_g1_i3	Inf	2.62954744373664e-05	0.0112266336820799	c23605_g1	SECA1_ARATH^SECA1_ARATH^Q:77-1249,H:613-1003^87.212%ID^E:0^RecName: Full=Protein translocase subunit SECA1, chloroplastic;^Eukaryota; Viridiplantae; Streptophyta; Embryophyta; Tracheophyta; Spermatophyta; Magnoliophyta; eudicotyledons; Gunneridae; Pentapetalae; rosids; malvids; Brassicales; Brassicaceae; Camelineae; Arabidopsis	Gene.19625::c23605_g1_i3::g.19625::m.19625	500-1336[+]	PF07516.10^SecA_SW^SecA Wing and Scaffold domain^10-225^E:6.5e-55	.	.	GO:0009570^cellular_component^chloroplast stroma`GO:0009535^cellular_component^chloroplast thylakoid membrane`GO:0005524^molecular_function^ATP binding`GO:0017038^biological_process^protein import`GO:0006605^biological_process^protein targeting	GO:0017038^biological_process^protein import`GO:0016020^cellular_component^membrane
c24822_g2_i8	Inf	2.62954744373664e-05	0.0112266336820799	c24822_g2	HDG2_ARATH^HDG2_ARATH^Q:2497-539,H:81-721^82.165%ID^E:0^RecName: Full=Homeobox-leucine zipper protein HDG2;^Eukaryota; Viridiplantae; Streptophyta; Embryophyta; Tracheophyta; Spermatophyta; Magnoliophyta; eudicotyledons; Gunneridae; Pentapetalae; rosids; malvids; Brassicales; Brassicaceae; Camelineae; Arabidopsis`HDG2_ARATH^HDG2_ARATH^Q:2808-2587,H:1-81^55.556%ID^E:5.5e-13^RecName: Full=Homeobox-…	Gene.25609::c24822_g2_i8::g.25609::m.25609	2578-536[-]	PF00046.26^Homeobox^Homeobox domain^29-67^E:2.1e-12`PF01852.16^START^START domain^202-421^E:1.4e-60	ENOG411107H^Homeobox-leucine zipper protein	.	GO:0005634^cellular_component^nucleus`GO:0008289^molecular_function^lipid binding`GO:0043565^molecular_function^sequence-specific DNA binding`GO:0003700^molecular_function^transcription factor activity, sequence-specific DNA binding`GO:0048497^biological_process^maintenance of floral organ identity`GO:0006351^biological_process^transcription, DNA-templated`GO:0010090^biological_process^trichome m…	GO:0003677^molecular_function^DNA binding`GO:0008289^molecular_function^lipid binding
c27670_g4_i4	Inf	2.62954744373664e-05	0.0112266336820799	c27670_g4	SOBRL_ARATH^SOBRL_ARATH^Q:1277-546,H:2-252^68.526%ID^E:4.02e-120^RecName: Full=Probable carboxylesterase SOBER1-like {ECO:0000305};^Eukaryota; Viridiplantae; Streptophyta; Embryophyta; Tracheophyta; Spermatophyta; Magnoliophyta; eudicotyledons; Gunneridae; Pentapetalae; rosids; malvids; Brassicales; Brassicaceae; Camelineae; Arabidopsis	Gene.45309::c27670_g4_i4::g.45309::m.45309	1349-522[-]	PF02230.13^Abhydrolase_2^Phospholipase/Carboxylesterase^61-268^E:1.2e-48`PF01738.15^DLH^Dienelactone hydrolase family^146-259^E:1.3e-08	COG0400^phospholipase carboxylesterase	KEGG:ath:AT4G22300	GO:0016787^molecular_function^hydrolase activity`GO:0006631^biological_process^fatty acid metabolic process	GO:0016787^molecular_function^hydrolase activity
c31448_g1_i2	Inf	2.62954744373664e-05	0.0112266336820799	c31448_g1	SNX13_MOUSE^SNX13_MOUSE^Q:2802-2023,H:32-276^21.978%ID^E:1.63e-06^RecName: Full=Sorting nexin-13;^Eukaryota; Metazoa; Chordata; Craniata; Vertebrata; Euteleostomi; Mammalia; Eutheria; Euarchontoglires; Glires; Rodentia; Sciurognathi; Muroidea; Muridae; Murinae; Mus; Mus	Gene.85489::c31448_g1_i2::g.85489::m.85489	2904-79[-]	PF02194.12^PXA^PXA domain^119-296^E:4.1e-34`PF00787.21^PX^PX domain^691-792^E:1.9e-15	ENOG410XRJ0^Sorting nexin 13	KEGG:mmu:217463`KO:K17925	GO:0005769^cellular_component^early endosome`GO:0031901^cellular_component^early endosome membrane`GO:0035091^molecular_function^phosphatidylinositol binding`GO:0032266^molecular_function^phosphatidylinositol-3-phosphate binding`GO:0006886^biological_process^intracellular protein transport`GO:0009968^biological_process^negative regulation of signal transduction`GO:0043547^biological_process^posit…	GO:0035091^molecular_function^phosphatidylinositol binding
c26356_g1_i6	Inf	2.935025693794e-05	0.0122751160302162	c26356_g1	FLXL1_ARATH^FLXL1_ARATH^Q:4684-3767,H:1-314^61.783%ID^E:1.21e-99^RecName: Full=Protein FLX-like 1;^Eukaryota; Viridiplantae; Streptophyta; Embryophyta; Tracheophyta; Spermatophyta; Magnoliophyta; eudicotyledons; Gunneridae; Pentapetalae; rosids; malvids; Brassicales; Brassicaceae; Camelineae; Arabidopsis	Gene.34840::c26356_g1_i6::g.34840::m.34840	4684-3740[-]	.	ENOG410YHMI^NA	KEGG:ath:AT3G14750	GO:0030154^biological_process^cell differentiation`GO:0009908^biological_process^flower development	.
c29105_g1_i9	Inf	2.935025693794e-05	0.0122751160302162	c29105_g1	MYO15_ARATH^MYO15_ARATH^Q:3783-1273,H:515-1340^72.792%ID^E:0^RecName: Full=Myosin-15;^Eukaryota; Viridiplantae; Streptophyta; Embryophyta; Tracheophyta; Spermatophyta; Magnoliophyta; eudicotyledons; Gunneridae; Pentapetalae; rosids; malvids; Brassicales; Brassicaceae; Camelineae; Arabidopsis`MYO15_ARATH^MYO15_ARATH^Q:5336-3813,H:8-514^80.709%ID^E:0^RecName: Full=Myosin-15;^Eukaryota; Viridiplanta…	Gene.59640::c29105_g1_i9::g.59640::m.59640	3780-1102[-]	PF00063.18^Myosin_head^Myosin head (motor domain)^1-210^E:7.7e-55`PF00612.24^IQ^IQ calmodulin-binding motif^227-245^E:0.027`PF00612.24^IQ^IQ calmodulin-binding motif^251-268^E:0.0083`PF00612.24^IQ^IQ calmodulin-binding motif^274-293^E:0.013`PF00612.24^IQ^IQ calmodulin-binding motif^299-316^E:0.0056`PF00612.24^IQ^IQ calmodulin-binding motif^322-342^E:0.005	COG5022^myosin heavy chain	.	GO:0005737^cellular_component^cytoplasm`GO:0016459^cellular_component^myosin complex`GO:0005524^molecular_function^ATP binding`GO:0003774^molecular_function^motor activity`GO:0030048^biological_process^actin filament-based movement	GO:0003774^molecular_function^motor activity`GO:0005524^molecular_function^ATP binding`GO:0016459^cellular_component^myosin complex`GO:0005515^molecular_function^protein binding
c30439_g3_i7	Inf	3.27607763685507e-05	0.0133739669776092	c30439_g3	SLMH_HYDIT^SLMH_HYDIT^Q:3259-2711,H:84-255^26.943%ID^E:3.03e-06^RecName: Full=4-sulfomuconolactone hydrolase;^Bacteria; Proteobacteria; Betaproteobacteria; Burkholderiales; Comamonadaceae; Hydrogenophaga	Gene.73953::c30439_g3_i7::g.73953::m.73953	3-2084[+]	.	.	.	.	.
c27419_g2_i1	Inf	3.65685567420013e-05	0.0146368505278356	c27419_g2	TAD2B_ARATH^TAD2B_ARATH^Q:491-1153,H:1-215^66.216%ID^E:6.83e-93^RecName: Full=Transcriptional adapter ADA2b;^Eukaryota; Viridiplantae; Streptophyta; Embryophyta; Tracheophyta; Spermatophyta; Magnoliophyta; eudicotyledons; Gunneridae; Pentapetalae; rosids; malvids; Brassicales; Brassicaceae; Camelineae; Arabidopsis`TAD2B_ARATH^TAD2B_ARATH^Q:2190-2885,H:268-485^60.776%ID^E:3.77e-87^RecName: Full=Tr…	Gene.43146::c27419_g2_i1::g.43146::m.43146	491-1174[+]	PF00569.14^ZZ^Zinc finger, ZZ type^45-77^E:3.5e-09`PF00249.28^Myb_DNA-binding^Myb-like DNA-binding domain^105-147^E:5.6e-12`PF13921.3^Myb_DNA-bind_6^Myb-like DNA-binding domain^106-147^E:2.6e-05	COG5114^transcriptional	KEGG:ath:AT4G16420`KO:K11314	GO:0005634^cellular_component^nucleus`GO:0003682^molecular_function^chromatin binding`GO:0003677^molecular_function^DNA binding`GO:0003713^molecular_function^transcription coactivator activity`GO:0003700^molecular_function^transcription factor activity, sequence-specific DNA binding`GO:0008270^molecular_function^zinc ion binding`GO:0006338^biological_process^chromatin remodeling`GO:0009631^biolog…	GO:0008270^molecular_function^zinc ion binding
c28961_g1_i11	Inf	3.65685567420013e-05	0.0146368505278356	c28961_g1	.	Gene.58094::c28961_g1_i11::g.58094::m.58094	2973-487[-]	PF08302.8^tRNA_lig_CPD^Fungal tRNA ligase phosphodiesterase domain^746-807^E:1.7e-05	.	.	.	GO:0003972^molecular_function^RNA ligase (ATP) activity`GO:0005524^molecular_function^ATP binding`GO:0006388^biological_process^tRNA splicing, via endonucleolytic cleavage and ligation
c31142_g1_i6	Inf	3.65685567420013e-05	0.0146368505278356	c31142_g1	AB26B_ARATH^AB26B_ARATH^Q:1636-560,H:340-698^66.295%ID^E:9.55e-158^RecName: Full=ABC transporter B family member 26, chloroplastic;^Eukaryota; Viridiplantae; Streptophyta; Embryophyta; Tracheophyta; Spermatophyta; Magnoliophyta; eudicotyledons; Gunneridae; Pentapetalae; rosids; malvids; Brassicales; Brassicaceae; Camelineae; Arabidopsis`AB26B_ARATH^AB26B_ARATH^Q:2565-1774,H:102-340^51.515%ID^E:2.…	Gene.81989::c31142_g1_i6::g.81989::m.81989	3454-5592[+]	PF04114.11^Gaa1^Gaa1-like, GPI transamidase component^150-704^E:8.6e-112	ENOG410XT16^glycosylphosphatidylinositol anchor attachment protein 1 homolog (yeast)	KEGG:mmu:14731`KO:K05289	GO:0042765^cellular_component^GPI-anchor transamidase complex`GO:0005887^cellular_component^integral component of plasma membrane`GO:0016020^cellular_component^membrane`GO:0034235^molecular_function^GPI anchor binding`GO:0003923^molecular_function^GPI-anchor transamidase activity`GO:0016255^biological_process^attachment of GPI anchor to protein`GO:0006506^biological_process^GPI anchor biosyntheti…	GO:0016021^cellular_component^integral component of membrane`GO:0042765^cellular_component^GPI-anchor transamidase complex
c28722_g4_i8	Inf	3.65685567420013e-05	0.0146368505278356	c28722_g4	TXLNA_HUMAN^TXLNA_HUMAN^Q:792-1508,H:229-478^39.044%ID^E:1.29e-20^RecName: Full=Alpha-taxilin;^Eukaryota; Metazoa; Chordata; Craniata; Vertebrata; Euteleostomi; Mammalia; Eutheria; Euarchontoglires; Primates; Haplorrhini; Catarrhini; Hominidae; Homo	Gene.55255::c28722_g4_i8::g.55255::m.55255	162-1556[+]	PF09728.6^Taxilin^Myosin-like coiled-coil protein^165-448^E:6.2e-65	ENOG410XQH1^Taxilin beta	KEGG:mmu:109658	GO:0005737^cellular_component^cytoplasm`GO:0016020^cellular_component^membrane`GO:0042113^biological_process^B cell activation`GO:0006887^biological_process^exocytosis`GO:0098779^biological_process^mitophagy in response to mitochondrial depolarization	GO:0019905^molecular_function^syntaxin binding
c25576_g1_i9	Inf	3.65685567420013e-05	0.0146368505278356	c25576_g1	MET16_DANRE^MET16_DANRE^Q:332-1261,H:6-284^41.379%ID^E:2.17e-72^RecName: Full=Methyltransferase-like protein 16;^Eukaryota; Metazoa; Chordata; Craniata; Vertebrata; Euteleostomi; Actinopterygii; Neopterygii; Teleostei; Ostariophysi; Cypriniformes; Cyprinidae; Danio	Gene.29966::c25576_g1_i9::g.29966::m.29966	293-1546[+]	PF05971.9^Methyltransf_10^Protein of unknown function (DUF890)^12-187^E:1.7e-49`PF05971.9^Methyltransf_10^Protein of unknown function (DUF890)^209-324^E:1.4e-29	COG3129^Specifically methylates the adenine in position 1618 of 23S rRNA (By similarity)	KEGG:dre:445217`KO:K11393	GO:0005634^cellular_component^nucleus`GO:0052907^molecular_function^23S rRNA (adenine(1618)-N(6))-methyltransferase activity`GO:0070475^biological_process^rRNA base methylation	GO:0008168^molecular_function^methyltransferase activity
c31367_g1_i3	Inf	4.08199800332617e-05	0.0156069405749559	c31367_g1	PP277_ARATH^PP277_ARATH^Q:5198-6091,H:82-379^55.034%ID^E:3.02e-98^RecName: Full=Pentatricopeptide repeat-containing protein At3g50420;^Eukaryota; Viridiplantae; Streptophyta; Embryophyta; Tracheophyta; Spermatophyta; Magnoliophyta; eudicotyledons; Gunneridae; Pentapetalae; rosids; malvids; Brassicales; Brassicaceae; Camelineae; Arabidopsis`PP277_ARATH^PP277_ARATH^Q:5264-6091,H:310-582^28.52%ID^E:…	Gene.84537::c31367_g1_i3::g.84537::m.84537	4999-4025[-]	.	.	.	.	.
c24172_g1_i1	Inf	4.08199800332617e-05	0.0156069405749559	c24172_g1	UNE10_ARATH^UNE10_ARATH^Q:1588-356,H:32-385^54.976%ID^E:1.25e-98^RecName: Full=Transcription factor UNE10;^Eukaryota; Viridiplantae; Streptophyta; Embryophyta; Tracheophyta; Spermatophyta; Magnoliophyta; eudicotyledons; Gunneridae; Pentapetalae; rosids; malvids; Brassicales; Brassicaceae; Camelineae; Arabidopsis	Gene.22293::c24172_g1_i1::g.22293::m.22293	1540-314[-]	PF00010.23^HLH^Helix-loop-helix DNA-binding domain^236-282^E:1e-13	ENOG4111B0G^Transcription factor	KEGG:ath:AT4G00050	GO:0005634^cellular_component^nucleus`GO:0009506^cellular_component^plasmodesma`GO:0003677^molecular_function^DNA binding`GO:0003700^molecular_function^transcription factor activity, sequence-specific DNA binding`GO:0009567^biological_process^double fertilization forming a zygote and endosperm`GO:0006355^biological_process^regulation of transcription, DNA-templated`GO:0006351^biological_process^t…	GO:0046983^molecular_function^protein dimerization activity
c21199_g1_i6	Inf	4.08199800332617e-05	0.0156069405749559	c21199_g1	GIS2_YEAST^GIS2_YEAST^Q:3678-4196,H:2-153^30.387%ID^E:8.56e-17^RecName: Full=Zinc finger protein GIS2;^Eukaryota; Fungi; Dikarya; Ascomycota; Saccharomycotina; Saccharomycetes; Saccharomycetales; Saccharomycetaceae; Saccharomyces`GIS2_YEAST^GIS2_YEAST^Q:3657-3989,H:14-153^32.857%ID^E:2.58e-13^RecName: Full=Zinc finger protein GIS2;^Eukaryota; Fungi; Dikarya; Ascomycota; Saccharomycotina; Saccharo…	Gene.11103::c21199_g1_i6::g.11103::m.11103	3717-4229[+]	PF00098.20^zf-CCHC^Zinc knuckle^10-25^E:3.7e-05`PF14392.3^zf-CCHC_4^Zinc knuckle^10-25^E:2.1`PF00098.20^zf-CCHC^Zinc knuckle^36-52^E:0.0014`PF13917.3^zf-CCHC_3^Zinc knuckle^53-71^E:0.13`PF14392.3^zf-CCHC_4^Zinc knuckle^54-70^E:1.3`PF00098.20^zf-CCHC^Zinc knuckle^55-71^E:1.6e-06`PF00098.20^zf-CCHC^Zinc knuckle^74-90^E:0.00089`PF14392.3^zf-CCHC_4^Zinc knuckle^74-90^E:0.08`PF00098.20^zf-CCHC^Zinc kn…	.	KEGG:sce:YNL255C`KO:K09250	GO:0000932^cellular_component^cytoplasmic mRNA processing body`GO:0010494^cellular_component^cytoplasmic stress granule`GO:0042788^cellular_component^polysomal ribosome`GO:0003729^molecular_function^mRNA binding`GO:0003697^molecular_function^single-stranded DNA binding`GO:0045182^molecular_function^translation regulator activity`GO:0008270^molecular_function^zinc ion binding`GO:0045727^biological…	GO:0003676^molecular_function^nucleic acid binding`GO:0008270^molecular_function^zinc ion binding
c26654_g1_i3	Inf	4.55668557425296e-05	0.0172289794852916	c26654_g1	WVD2_ARATH^WVD2_ARATH^Q:879-1238,H:68-176^46.667%ID^E:5.01e-25^RecName: Full=Protein WAVE-DAMPENED 2;^Eukaryota; Viridiplantae; Streptophyta; Embryophyta; Tracheophyta; Spermatophyta; Magnoliophyta; eudicotyledons; Gunneridae; Pentapetalae; rosids; malvids; Brassicales; Brassicaceae; Camelineae; Arabidopsis	Gene.37093::c26654_g1_i3::g.37093::m.37093	324-1577[+]	PF06886.8^TPX2^Targeting protein for Xklp2 (TPX2)^218-274^E:8.9e-21	ENOG411061M^Targeting protein for Xklp2 (TPX2)	KEGG:ath:AT5G28646	GO:0055028^cellular_component^cortical microtubule`GO:0007163^biological_process^establishment or maintenance of cell polarity`GO:0001578^biological_process^microtubule bundle formation`GO:0000226^biological_process^microtubule cytoskeleton organization`GO:0009825^biological_process^multidimensional cell growth`GO:0010091^biological_process^trichome branching	.
c26170_g1_i4	Inf	5.08670573679618e-05	0.0191622937509764	c26170_g1	YMF11_MARPO^YMF11_MARPO^Q:482-1975,H:215-714^23.478%ID^E:5.19e-25^RecName: Full=Uncharacterized mitochondrial protein ymf11;^Eukaryota; Viridiplantae; Streptophyta; Embryophyta; Marchantiophyta; Marchantiopsida; Marchantiidae; Marchantiales; Marchantiaceae; Marchantia	Gene.33528::c26170_g1_i4::g.33528::m.33528	2-2176[+]	PF01348.18^Intron_maturas2^Type II intron maturase^545-602^E:1.3e-05	.	.	GO:0005739^cellular_component^mitochondrion`GO:0006397^biological_process^mRNA processing	GO:0006397^biological_process^mRNA processing
c30923_g1_i2	Inf	5.67852336619379e-05	0.0207066041010823	c30923_g1	RP6L3_ARATH^RP6L3_ARATH^Q:2228-816,H:309-791^62.577%ID^E:0^RecName: Full=Protein RRP6-like 3 {ECO:0000303|PubMed:18285452};^Eukaryota; Viridiplantae; Streptophyta; Embryophyta; Tracheophyta; Spermatophyta; Magnoliophyta; eudicotyledons; Gunneridae; Pentapetalae; rosids; malvids; Brassicales; Brassicaceae; Camelineae; Arabidopsis`RP6L3_ARATH^RP6L3_ARATH^Q:572-327,H:807-888^69.512%ID^E:3.13e-33^Rec…	Gene.79662::c30923_g1_i2::g.79662::m.79662	2228-300[-]	PF00570.20^HRDC^HRDC domain^48-90^E:7e-05	ENOG410XS63^Exonuclease 3'-5' domain containing 2	.	GO:0005829^cellular_component^cytosol`GO:0008408^molecular_function^3'-5' exonuclease activity`GO:0003676^molecular_function^nucleic acid binding`GO:0000166^molecular_function^nucleotide binding	GO:0003676^molecular_function^nucleic acid binding`GO:0005622^cellular_component^intracellular
c21290_g1_i4	Inf	5.67852336619379e-05	0.0207066041010823	c21290_g1	PAXI1_HUMAN^PAXI1_HUMAN^Q:1590-2108,H:889-1068^29.67%ID^E:1.79e-18^RecName: Full=PAX-interacting protein 1;^Eukaryota; Metazoa; Chordata; Craniata; Vertebrata; Euteleostomi; Mammalia; Eutheria; Euarchontoglires; Primates; Haplorrhini; Catarrhini; Hominidae; Homo	Gene.11356::c21290_g1_i4::g.11356::m.11356	135-2123[+]	.	ENOG410XSGS^pax interacting (with transcription-activation domain) protein 1	KEGG:hsa:22976`KO:K14972	GO:0035097^cellular_component^histone methyltransferase complex`GO:0016363^cellular_component^nuclear matrix`GO:0005654^cellular_component^nucleoplasm`GO:0005634^cellular_component^nucleus`GO:0060612^biological_process^adipose tissue development`GO:0060717^biological_process^chorion development`GO:0030330^biological_process^DNA damage response, signal transduction by p53 class mediator`GO:0006310…	.
c23432_g1_i2	Inf	6.33936034725576e-05	0.0220941801816976	c23432_g1	.	Gene.18861::c23432_g1_i2::g.18861::m.18861	2066-555[-]	PF01426.15^BAH^BAH domain^4-102^E:3.2e-08`PF05641.9^Agenet^Agenet domain^212-286^E:8.1e-19	.	.	.	GO:0003682^molecular_function^chromatin binding
c26390_g3_i6	Inf	6.33936034725576e-05	0.0220941801816976	c26390_g3	.	Gene.35174::c26390_g3_i6::g.35174::m.35174	658-2121[+]	.	.	.	.	.
c24372_g2_i1	Inf	6.33936034725576e-05	0.0220941801816976	c24372_g2	LAZH1_ARATH^LAZH1_ARATH^Q:1706-834,H:190-480^78.767%ID^E:3.04e-165^RecName: Full=Protein LAZ1 homolog 1 {ECO:0000303|PubMed:20830211};^Eukaryota; Viridiplantae; Streptophyta; Embryophyta; Tracheophyta; Spermatophyta; Magnoliophyta; eudicotyledons; Gunneridae; Pentapetalae; rosids; malvids; Brassicales; Brassicaceae; Camelineae; Arabidopsis	Gene.23133::c24372_g2_i1::g.23133::m.23133	1706-825[-]	PF03619.13^Solute_trans_a^Organic solute transporter Ostalpha^1-132^E:6.2e-45	ENOG410XQ3V^transmembrane protein 184B	KEGG:ath:AT1G77220	GO:0016021^cellular_component^integral component of membrane`GO:0009626^biological_process^plant-type hypersensitive response	.
c28992_g2_i7	Inf	6.33936034725576e-05	0.0220941801816976	c28992_g2	ASF1A_ARATH^ASF1A_ARATH^Q:2704-2177,H:1-176^81.25%ID^E:1.94e-93^RecName: Full=Probable histone chaperone ASF1A;^Eukaryota; Viridiplantae; Streptophyta; Embryophyta; Tracheophyta; Spermatophyta; Magnoliophyta; eudicotyledons; Gunneridae; Pentapetalae; rosids; malvids; Brassicales; Brassicaceae; Camelineae; Arabidopsis	Gene.58476::c28992_g2_i7::g.58476::m.58476	2704-2156[-]	PF04729.10^ASF1_hist_chap^ASF1 like histone chaperone^1-153^E:5e-70	COG5137^ASF1 anti-silencing function 1 homolog	KEGG:ath:AT1G66740`KO:K10753	GO:0005737^cellular_component^cytoplasm`GO:0005634^cellular_component^nucleus`GO:0051301^biological_process^cell division`GO:0006333^biological_process^chromatin assembly or disassembly`GO:0016568^biological_process^chromatin modification`GO:0000724^biological_process^double-strand break repair via homologous recombination`GO:0031567^biological_process^mitotic cell size control checkpoint`GO:0008…	GO:0006333^biological_process^chromatin assembly or disassembly`GO:0005634^cellular_component^nucleus
c23716_g2_i1	Inf	7.07728440093383e-05	0.0244993588995299	c23716_g2	SF3A2_HUMAN^SF3A2_HUMAN^Q:1371-796,H:37-226^69.792%ID^E:2.61e-70^RecName: Full=Splicing factor 3A subunit 2;^Eukaryota; Metazoa; Chordata; Craniata; Vertebrata; Euteleostomi; Mammalia; Eutheria; Euarchontoglires; Primates; Haplorrhini; Catarrhini; Hominidae; Homo	Gene.20112::c23716_g2_i1::g.20112::m.20112	1473-427[-]	PF12874.4^zf-met^Zinc-finger of C2H2 type^52-76^E:1.9e-06`PF16835.2^SF3A2^Pre-mRNA-splicing factor SF3a complex subunit 2 (Prp11)^110-204^E:7.4e-36	COG5246^Splicing factor 3A subunit	KEGG:hsa:8175`KO:K12826	GO:0071013^cellular_component^catalytic step 2 spliceosome`GO:0016607^cellular_component^nuclear speck`GO:0005654^cellular_component^nucleoplasm`GO:0030532^cellular_component^small nuclear ribonucleoprotein complex`GO:0005681^cellular_component^spliceosomal complex`GO:0005686^cellular_component^U2 snRNP`GO:0071004^cellular_component^U2-type prespliceosome`GO:0044822^molecular_function^poly(A) RNA…	.
c27250_g1_i2	Inf	7.90130835316583e-05	0.0266320875564306	c27250_g1	.	Gene.41917::c27250_g1_i2::g.41917::m.41917	1180-2004[+]	.	.	.	.	.
c19825_g1_i1	Inf	9.84911147178351e-05	0.0323461235919157	c19825_g1	LPPB_ARATH^LPPB_ARATH^Q:275-757,H:13-197^49.189%ID^E:1.69e-29^RecName: Full=Probable lipid phosphate phosphatase beta;^Eukaryota; Viridiplantae; Streptophyta; Embryophyta; Tracheophyta; Spermatophyta; Magnoliophyta; eudicotyledons; Gunneridae; Pentapetalae; rosids; malvids; Brassicales; Brassicaceae; Camelineae; Arabidopsis	Gene.7800::c19825_g1_i1::g.7800::m.7800	215-787[+]	PF01569.18^PAP2^PAP2 superfamily^74-188^E:6e-20`PF14378.3^PAP2_3^PAP2 superfamily^108-179^E:8.4e-07	ENOG410ZVFK^Phosphatidic acid phosphatase type 2 domain containing	KEGG:ath:AT4G22550	GO:0016021^cellular_component^integral component of membrane`GO:0016787^molecular_function^hydrolase activity	.
c28576_g1_i9	Inf	9.84911147178351e-05	0.0323461235919157	c28576_g1	DHBK_SOLLC^DHBK_SOLLC^Q:3460-2960,H:1-168^92.262%ID^E:1.68e-94^RecName: Full=Putative 3,4-dihydroxy-2-butanone kinase;^Eukaryota; Viridiplantae; Streptophyta; Embryophyta; Tracheophyta; Spermatophyta; Magnoliophyta; eudicotyledons; Gunneridae; Pentapetalae; asterids; lamiids; Solanales; Solanaceae; Solanoideae; Solaneae; Solanum; Lycopersicon`DHBK_SOLLC^DHBK_SOLLC^Q:2338-2063,H:181-272^88.043%ID^…	Gene.53792::c28576_g1_i9::g.53792::m.53792	1191-58[-]	PF13966.3^zf-RVT^zinc-binding in reverse transcriptase^23-108^E:2.3e-14`PF13456.3^RVT_3^Reverse transcriptase-like^220-340^E:6.6e-27	.	.	GO:0046872^molecular_function^metal ion binding`GO:0003676^molecular_function^nucleic acid binding`GO:0004523^molecular_function^RNA-DNA hybrid ribonuclease activity	.
c29809_g2_i11	Inf	0.000109967070476883	0.0355453812097295	c29809_g2	RGAP7_ARATH^RGAP7_ARATH^Q:303-1643,H:1-440^80.313%ID^E:0^RecName: Full=Rho GTPase-activating protein 7;^Eukaryota; Viridiplantae; Streptophyta; Embryophyta; Tracheophyta; Spermatophyta; Magnoliophyta; eudicotyledons; Gunneridae; Pentapetalae; rosids; malvids; Brassicales; Brassicaceae; Camelineae; Arabidopsis`RGAP7_ARATH^RGAP7_ARATH^Q:3101-3991,H:440-734^62.626%ID^E:5.28e-79^RecName: Full=Rho GTP…	Gene.67057::c29809_g2_i11::g.67057::m.67057	303-1712[+]	PF00169.26^PH^PH domain^20-124^E:6.9e-14`PF00620.24^RhoGAP^RhoGAP domain^181-325^E:7.4e-31	ENOG410XR4E^rho GTPase activating protein	.	GO:0009535^cellular_component^chloroplast thylakoid membrane`GO:0005096^molecular_function^GTPase activator activity`GO:0043547^biological_process^positive regulation of GTPase activity`GO:0007165^biological_process^signal transduction	GO:0007165^biological_process^signal transduction
c30312_g1_i9	Inf	0.000109967070476883	0.0355453812097295	c30312_g1	SRRM1_CHICK^SRRM1_CHICK^Q:118-489,H:1-125^60.8%ID^E:2.55e-38^RecName: Full=Serine/arginine repetitive matrix protein 1;^Eukaryota; Metazoa; Chordata; Craniata; Vertebrata; Euteleostomi; Archelosauria; Archosauria; Dinosauria; Saurischia; Theropoda; Coelurosauria; Aves; Neognathae; Galloanserae; Galliformes; Phasianidae; Phasianinae; Gallus	Gene.72471::c30312_g1_i9::g.72471::m.72471	118-2829[+]	PF01480.14^PWI^PWI domain^46-115^E:3.5e-28	ENOG4111IMU^serine arginine repetitive matrix	KEGG:gga:428216`KO:K13171	GO:0005634^cellular_component^nucleus`GO:0006397^biological_process^mRNA processing`GO:0008380^biological_process^RNA splicing	GO:0006397^biological_process^mRNA processing
c30557_g7_i4	Inf	0.000122783287799857	0.0385923692260742	c30557_g7	.	Gene.75244::c30557_g7_i4::g.75244::m.75244	888-1679[+]	PF12146.5^Hydrolase_4^Serine aminopeptidase, S33^5-245^E:1.1e-08`PF12697.4^Abhydrolase_6^Alpha/beta hydrolase family^9-243^E:4.7e-09`PF00561.17^Abhydrolase_1^alpha/beta hydrolase fold^9-242^E:4.9e-06	.	.	.	.
c24087_g1_i6	Inf	0.000122783287799857	0.0385923692260742	c24087_g1	WBP4_CHICK^WBP4_CHICK^Q:2021-1773,H:1-83^39.759%ID^E:9.61e-11^RecName: Full=WW domain-binding protein 4;^Eukaryota; Metazoa; Chordata; Craniata; Vertebrata; Euteleostomi; Archelosauria; Archosauria; Dinosauria; Saurischia; Theropoda; Coelurosauria; Aves; Neognathae; Galloanserae; Galliformes; Phasianidae; Phasianinae; Gallus	Gene.21925::c24087_g1_i6::g.21925::m.21925	867-391[-]	.	.	.	.	.
c28770_g2_i8	Inf	0.000137096642061424	0.0428284894069082	c28770_g2	AMPD_ARATH^AMPD_ARATH^Q:248-2509,H:15-714^56.005%ID^E:0^RecName: Full=AMP deaminase {ECO:0000303|PubMed:15918887};^Eukaryota; Viridiplantae; Streptophyta; Embryophyta; Tracheophyta; Spermatophyta; Magnoliophyta; eudicotyledons; Gunneridae; Pentapetalae; rosids; malvids; Brassicales; Brassicaceae; Camelineae; Arabidopsis`AMPD_ARATH^AMPD_ARATH^Q:2950-3198,H:699-781^90.361%ID^E:3.09e-39^RecName: Ful…	Gene.55872::c28770_g2_i8::g.55872::m.55872	194-2533[+]	PF00962.19^A_deaminase^Adenosine/AMP deaminase^442-773^E:3.3e-83	COG1816^adenosine deaminase	KEGG:ath:AT2G38280`KO:K01490	GO:0005829^cellular_component^cytosol`GO:0005783^cellular_component^endoplasmic reticulum`GO:0031307^cellular_component^integral component of mitochondrial outer membrane`GO:0043231^cellular_component^intracellular membrane-bounded organelle`GO:0005634^cellular_component^nucleus`GO:0003876^molecular_function^AMP deaminase activity`GO:0005524^molecular_function^ATP binding`GO:0046872^molecular_fun…	GO:0019239^molecular_function^deaminase activity
c29080_g1_i3	Inf	0.000153082408801565	0.0465452287841576	c29080_g1	ATAD1_RAT^ATAD1_RAT^Q:1955-1095,H:70-342^42.509%ID^E:2.36e-68^RecName: Full=ATPase family AAA domain-containing protein 1;^Eukaryota; Metazoa; Chordata; Craniata; Vertebrata; Euteleostomi; Mammalia; Eutheria; Euarchontoglires; Glires; Rodentia; Sciurognathi; Muroidea; Muridae; Murinae; Rattus	Gene.59400::c29080_g1_i3::g.59400::m.59400	4745-1011[-]	PF00498.23^FHA^FHA domain^157-225^E:7.8e-05`PF05496.9^RuvB_N^Holliday junction DNA helicase ruvB N-terminus^988-1058^E:0.0002`PF00004.26^AAA^ATPase family associated with various cellular activities (AAA)^990-1119^E:1.3e-36	COG0464^Aaa atpase	KEGG:bta:506045	GO:0030054^cellular_component^cell junction`GO:0005777^cellular_component^peroxisome`GO:0045211^cellular_component^postsynaptic membrane`GO:0005524^molecular_function^ATP binding`GO:0016887^molecular_function^ATPase activity`GO:0008568^molecular_function^microtubule-severing ATPase activity`GO:0007612^biological_process^learning`GO:0007613^biological_process^memory`GO:0051967^biological_process^n…	GO:0005515^molecular_function^protein binding`GO:0009378^molecular_function^four-way junction helicase activity`GO:0006281^biological_process^DNA repair`GO:0006310^biological_process^DNA recombination`GO:0005524^molecular_function^ATP binding
c22961_g1_i8	Inf	0.000153082408801565	0.0465452287841576	c22961_g1	PALA_EMENI^PALA_EMENI^Q:2594-2190,H:95-226^31.655%ID^E:4.61e-07^RecName: Full=pH-response regulator protein palA/RIM20;^Eukaryota; Fungi; Dikarya; Ascomycota; Pezizomycotina; Eurotiomycetes; Eurotiomycetidae; Eurotiales; Aspergillaceae; Aspergillus	Gene.17053::c22961_g1_i8::g.17053::m.17053	2951-2127[-]	PF03097.15^BRO1^BRO1-like domain^72-253^E:3.9e-16	.	KEGG:ani:AN4351.2`KO:K12200	GO:0000815^cellular_component^ESCRT III complex`GO:0071467^biological_process^cellular response to pH`GO:0001403^biological_process^invasive growth in response to glucose limitation`GO:0042318^biological_process^penicillin biosynthetic process`GO:1900198^biological_process^positive regulation of penicillin biosynthetic process`GO:0016485^biological_process^protein processing`GO:1900376^biological…	.
c26185_g2_i3	Inf	0.000153082408801565	0.0465452287841576	c26185_g2	NIPA6_ARATH^NIPA6_ARATH^Q:337-1029,H:2-232^71.429%ID^E:1.44e-105^RecName: Full=Probable magnesium transporter NIPA6;^Eukaryota; Viridiplantae; Streptophyta; Embryophyta; Tracheophyta; Spermatophyta; Magnoliophyta; eudicotyledons; Gunneridae; Pentapetalae; rosids; malvids; Brassicales; Brassicaceae; Camelineae; Arabidopsis`NIPA6_ARATH^NIPA6_ARATH^Q:1169-1276,H:262-297^63.889%ID^E:1.83e-13^RecName:…	Gene.33650::c26185_g2_i3::g.33650::m.33650	247-1089[+]	PF05653.11^Mg_trans_NIPA^Magnesium transporter NIPA^32-262^E:5.2e-102`PF06027.9^SLC35F^Solute carrier family 35^77-257^E:7.3e-05	ENOG410XNR8^NIPA-like domain containing	KEGG:ath:AT2G21120	GO:0005769^cellular_component^early endosome`GO:0016021^cellular_component^integral component of membrane`GO:0005886^cellular_component^plasma membrane`GO:0015095^molecular_function^magnesium ion transmembrane transporter activity`GO:0015693^biological_process^magnesium ion transport	GO:0015095^molecular_function^magnesium ion transmembrane transporter activity`GO:0015693^biological_process^magnesium ion transport`GO:0016021^cellular_component^integral component of membrane`GO:0006810^biological_process^transport
c29097_g1_i10	Inf	0.000153082408801565	0.0465452287841576	c29097_g1	Y5158_ARATH^Y5158_ARATH^Q:3096-1765,H:46-490^77.582%ID^E:0^RecName: Full=Probable receptor-like protein kinase At5g15080;^Eukaryota; Viridiplantae; Streptophyta; Embryophyta; Tracheophyta; Spermatophyta; Magnoliophyta; eudicotyledons; Gunneridae; Pentapetalae; rosids; malvids; Brassicales; Brassicaceae; Camelineae; Arabidopsis	Gene.59578::c29097_g1_i10::g.59578::m.59578	3213-1756[-]	PF00069.22^Pkinase^Protein kinase domain^133-408^E:1e-45`PF07714.14^Pkinase_Tyr^Protein tyrosine kinase^134-410^E:5.3e-46	COG0515^Serine Threonine protein kinase	KEGG:ath:AT5G15080	GO:0016021^cellular_component^integral component of membrane`GO:0005886^cellular_component^plasma membrane`GO:0005524^molecular_function^ATP binding`GO:0004674^molecular_function^protein serine/threonine kinase activity	GO:0004672^molecular_function^protein kinase activity`GO:0005524^molecular_function^ATP binding`GO:0006468^biological_process^protein phosphorylation
c20285_g1_i3	-11.2549	1.36474527293214e-99	1.39839989136264e-94	c20285_g1	.	Gene.8703::c20285_g1_i3::g.8703::m.8703	2-355[+]	.	.	.	.	.
c31090_g2_i9	-2.02657	8.05274455476987e-05	0.0270535253622639	c31090_g2	MD37D_ARATH^MD37D_ARATH^Q:1759-1649,H:582-618^91.892%ID^E:1.28e-13^RecName: Full=Probable mediator of RNA polymerase II transcription subunit 37c;^Eukaryota; Viridiplantae; Streptophyta; Embryophyta; Tracheophyta; Spermatophyta; Magnoliophyta; eudicotyledons; Gunneridae; Pentapetalae; rosids; malvids; Brassicales; Brassicaceae; Camelineae; Arabidopsis	Gene.81390::c31090_g2_i9::g.81390::m.81390	491-1165[+]	.	.	.	.	.
c29801_g2_i7	-2.45075	3.71949763288278e-05	0.0147183439011339	c29801_g2	ATX2_ARATH^ATX2_ARATH^Q:5944-6642,H:690-945^27.239%ID^E:2.84e-19^RecName: Full=Histone-lysine N-methyltransferase ATX2;^Eukaryota; Viridiplantae; Streptophyta; Embryophyta; Tracheophyta; Spermatophyta; Magnoliophyta; eudicotyledons; Gunneridae; Pentapetalae; rosids; malvids; Brassicales; Brassicaceae; Camelineae; Arabidopsis`ATX2_ARATH^ATX2_ARATH^Q:6723-6902,H:945-1001^47.541%ID^E:2.84e-19^RecNam…	Gene.66934::c29801_g2_i7::g.66934::m.66934	541-6645[+]	PF16135.2^Jas^TPL-binding domain in jasmonate signalling^246-297^E:3.2e-06`PF13831.3^PHD_2^PHD-finger^1655-1688^E:1.2e-10`PF13832.3^zf-HC5HC2H_2^PHD-zinc-finger like domain^1806-1893^E:5.8e-16`PF13771.3^zf-HC5HC2H^PHD-like zinc-binding domain^1816-1905^E:1.4e-15	COG5076^bromodomain`COG5141^phd finger	KEGG:hsa:27154`KO:K11350	GO:0005829^cellular_component^cytosol`GO:0005576^cellular_component^extracellular region`GO:0070776^cellular_component^MOZ/MORF histone acetyltransferase complex`GO:0008270^molecular_function^zinc ion binding`GO:0007596^biological_process^blood coagulation`GO:0043966^biological_process^histone H3 acetylation`GO:0030168^biological_process^platelet activation`GO:0002576^biological_process^platelet …	.
c31336_g1_i8	-2.52637	2.40603306040303e-09	3.94685448861097e-06	c31336_g1	VP13A_DICDI^VP13A_DICDI^Q:2785-890,H:2511-3196^19.08%ID^E:8.44e-11^RecName: Full=Putative vacuolar protein sorting-associated protein 13A;^Eukaryota; Amoebozoa; Mycetozoa; Dictyosteliida; Dictyostelium	Gene.84178::c31336_g1_i8::g.84178::m.84178	9653-2835[-]	.	.	.	.	.
c28348_g1_i4	-2.54664	0.000115476282094925	0.037092140191657	c28348_g1	NCPR_VIGRR^NCPR_VIGRR^Q:351-1862,H:7-509^78.614%ID^E:0^RecName: Full=NADPH--cytochrome P450 reductase {ECO:0000255|HAMAP-Rule:MF_03212};^Eukaryota; Viridiplantae; Streptophyta; Embryophyta; Tracheophyta; Spermatophyta; Magnoliophyta; eudicotyledons; Gunneridae; Pentapetalae; rosids; fabids; Fabales; Fabaceae; Papilionoideae; Phaseoleae; Vigna`NCPR_VIGRR^NCPR_VIGRR^Q:1874-2425,H:506-689^84.239%ID^…	Gene.51481::c28348_g1_i4::g.51481::m.51481	327-1994[+]	PF00258.22^Flavodoxin_1^Flavodoxin^87-230^E:6.4e-33`PF00667.17^FAD_binding_1^FAD binding domain^288-510^E:8.3e-76	.	.	GO:0005789^cellular_component^endoplasmic reticulum membrane`GO:0010181^molecular_function^FMN binding`GO:0005506^molecular_function^iron ion binding`GO:0003958^molecular_function^NADPH-hemoprotein reductase activity	GO:0010181^molecular_function^FMN binding`GO:0016491^molecular_function^oxidoreductase activity`GO:0055114^biological_process^oxidation-reduction process
c29650_g1_i10	-2.56154	2.80537918708738e-05	0.011829464353255	c29650_g1	Y4424_ARATH^Y4424_ARATH^Q:1-1374,H:79-480^70.961%ID^E:0^RecName: Full=DUF21 domain-containing protein At4g14240;^Eukaryota; Viridiplantae; Streptophyta; Embryophyta; Tracheophyta; Spermatophyta; Magnoliophyta; eudicotyledons; Gunneridae; Pentapetalae; rosids; malvids; Brassicales; Brassicaceae; Camelineae; Arabidopsis	Gene.65453::c29650_g1_i10::g.65453::m.65453	610-1407[+]	.	COG1253^CBS Domain protein	KEGG:ath:AT4G14230`KO:K16302	GO:0016021^cellular_component^integral component of membrane`GO:0005739^cellular_component^mitochondrion	.
c17031_g1_i1	-2.63517	7.37676024580596e-15	2.69952541195269e-11	c17031_g1	.	Gene.4194::c17031_g1_i1::g.4194::m.4194	210-707[+]	.	.	.	.	.
c24904_g1_i2	-2.65098	7.12636903751525e-05	0.024586213124513	c24904_g1	CAPP4_ARATH^CAPP4_ARATH^Q:3537-376,H:1-1032^78.768%ID^E:0^RecName: Full=Phosphoenolpyruvate carboxylase 4;^Eukaryota; Viridiplantae; Streptophyta; Embryophyta; Tracheophyta; Spermatophyta; Magnoliophyta; eudicotyledons; Gunneridae; Pentapetalae; rosids; malvids; Brassicales; Brassicaceae; Camelineae; Arabidopsis	Gene.26067::c24904_g1_i2::g.26067::m.26067	3537-373[-]	PF00311.14^PEPcase^Phosphoenolpyruvate carboxylase^145-340^E:8.2e-59`PF00311.14^PEPcase^Phosphoenolpyruvate carboxylase^439-1054^E:1.2e-226	COG2352^phosphoenolpyruvate carboxylase activity	KEGG:ath:AT1G68750`KO:K01595	GO:0005737^cellular_component^cytoplasm`GO:0008964^molecular_function^phosphoenolpyruvate carboxylase activity`GO:0015977^biological_process^carbon fixation`GO:0015979^biological_process^photosynthesis`GO:0006099^biological_process^tricarboxylic acid cycle	GO:0008964^molecular_function^phosphoenolpyruvate carboxylase activity`GO:0006099^biological_process^tricarboxylic acid cycle`GO:0015977^biological_process^carbon fixation
c18236_g1_i1	-2.71055	1.25659583423155e-06	0.000926319055758056	c18236_g1	WIP1_ARATH^WIP1_ARATH^Q:443-2317,H:1-489^38.986%ID^E:1.61e-74^RecName: Full=WPP domain-interacting protein 1;^Eukaryota; Viridiplantae; Streptophyta; Embryophyta; Tracheophyta; Spermatophyta; Magnoliophyta; eudicotyledons; Gunneridae; Pentapetalae; rosids; malvids; Brassicales; Brassicaceae; Camelineae; Arabidopsis	Gene.5364::c18236_g1_i1::g.5364::m.5364	443-2320[+]	.	ENOG410YHC5^WPP domain-interacting protein	KEGG:ath:AT4G26455	GO:0009504^cellular_component^cell plate`GO:0016021^cellular_component^integral component of membrane`GO:0005635^cellular_component^nuclear envelope`GO:0031965^cellular_component^nuclear membrane`GO:0046982^molecular_function^protein heterodimerization activity`GO:0006997^biological_process^nucleus organization	.
c24185_g1_i5	-3.0184	2.90474371618927e-08	3.58599360991626e-05	c24185_g1	DAPA_TOBAC^DAPA_TOBAC^Q:1390-338,H:9-359^82.906%ID^E:0^RecName: Full=4-hydroxy-tetrahydrodipicolinate synthase, chloroplastic;^Eukaryota; Viridiplantae; Streptophyta; Embryophyta; Tracheophyta; Spermatophyta; Magnoliophyta; eudicotyledons; Gunneridae; Pentapetalae; asterids; lamiids; Solanales; Solanaceae; Nicotianoideae; Nicotianeae; Nicotiana	Gene.22348::c24185_g1_i5::g.22348::m.22348	1408-335[-]	PF00701.19^DHDPS^Dihydrodipicolinate synthetase family^58-331^E:5.5e-94	.	.	GO:0009507^cellular_component^chloroplast`GO:0008840^molecular_function^4-hydroxy-tetrahydrodipicolinate synthase`GO:0019877^biological_process^diaminopimelate biosynthetic process`GO:0009089^biological_process^lysine biosynthetic process via diaminopimelate	GO:0016829^molecular_function^lyase activity`GO:0008152^biological_process^metabolic process
c30725_g2_i5	-3.16457	1.46974225654543e-06	0.00104582368096655	c30725_g2	ACO1_ARATH^ACO1_ARATH^Q:2850-715,H:183-897^89.091%ID^E:0^RecName: Full=Aconitate hydratase 1;^Eukaryota; Viridiplantae; Streptophyta; Embryophyta; Tracheophyta; Spermatophyta; Magnoliophyta; eudicotyledons; Gunneridae; Pentapetalae; rosids; malvids; Brassicales; Brassicaceae; Camelineae; Arabidopsis	Gene.77236::c30725_g2_i5::g.77236::m.77236	2706-703[-]	PF00330.17^Aconitase^Aconitase family (aconitate hydratase)^1-335^E:1.5e-120`PF00694.16^Aconitase_C^Aconitase C-terminal domain^464-592^E:1.1e-48	COG1048^aconitate hydratase	.	GO:0048046^cellular_component^apoplast`GO:0005829^cellular_component^cytosol`GO:0005739^cellular_component^mitochondrion`GO:0005886^cellular_component^plasma membrane`GO:0009506^cellular_component^plasmodesma`GO:0005773^cellular_component^vacuole`GO:0051539^molecular_function^4 iron, 4 sulfur cluster binding`GO:0003994^molecular_function^aconitate hydratase activity`GO:0005507^molecular_function^…	GO:0008152^biological_process^metabolic process
c30402_g1_i4	-3.45721	4.31257924549257e-06	0.00249656918061379	c30402_g1	KEG_ARATH^KEG_ARATH^Q:651-1223,H:215-426^30.986%ID^E:3.78e-19^RecName: Full=E3 ubiquitin-protein ligase KEG;^Eukaryota; Viridiplantae; Streptophyta; Embryophyta; Tracheophyta; Spermatophyta; Magnoliophyta; eudicotyledons; Gunneridae; Pentapetalae; rosids; malvids; Brassicales; Brassicaceae; Camelineae; Arabidopsis`KEG_ARATH^KEG_ARATH^Q:1425-1907,H:1080-1240^24.706%ID^E:1.06e-09^RecName: Full=E3 u…	Gene.73458::c30402_g1_i4::g.73458::m.73458	651-2186[+]	PF00069.22^Pkinase^Protein kinase domain^5-189^E:2e-18`PF07714.14^Pkinase_Tyr^Protein tyrosine kinase^8-189^E:9.1e-16	COG0666^Ankyrin Repeat	.	GO:0005769^cellular_component^early endosome`GO:0005802^cellular_component^trans-Golgi network`GO:0005524^molecular_function^ATP binding`GO:0016874^molecular_function^ligase activity`GO:0004672^molecular_function^protein kinase activity`GO:0043621^molecular_function^protein self-association`GO:0004674^molecular_function^protein serine/threonine kinase activity`GO:0004842^molecular_function^ubiqui…	GO:0004672^molecular_function^protein kinase activity`GO:0005524^molecular_function^ATP binding`GO:0006468^biological_process^protein phosphorylation
c30652_g1_i5	-3.52071	2.20000492183454e-07	0.000206812572771282	c30652_g1	.	Gene.76366::c30652_g1_i5::g.76366::m.76366	410-3[-]	.	.	.	.	.
c30753_g1_i2	-3.58649	1.53422609226191e-06	0.00107675349842266	c30753_g1	SEN1_YEAST^SEN1_YEAST^Q:2894-1260,H:1352-1852^34.601%ID^E:3.71e-81^RecName: Full=Helicase SEN1;^Eukaryota; Fungi; Dikarya; Ascomycota; Saccharomycotina; Saccharomycetes; Saccharomycetales; Saccharomycetaceae; Saccharomyces	Gene.77491::c30753_g1_i2::g.77491::m.77491	3527-915[-]	PF13086.3^AAA_11^AAA domain^187-532^E:1.5e-67`PF13087.3^AAA_12^AAA domain^539-735^E:1.6e-58	.	KEGG:spo:SPBC29A10.10c`KO:K10706	GO:0035649^cellular_component^Nrd1 complex`GO:0005634^cellular_component^nucleus`GO:0035861^cellular_component^site of double-strand break`GO:0005524^molecular_function^ATP binding`GO:0004004^molecular_function^ATP-dependent RNA helicase activity`GO:0006364^biological_process^rRNA processing`GO:0043144^biological_process^snoRNA processing`GO:0016180^biological_process^snRNA processing`GO:0008033^…	.
c28206_g1_i4	-4.24976	7.4542075139254e-05	0.0252080140964317	c28206_g1	SRAC1_BOVIN^SRAC1_BOVIN^Q:524-42,H:395-556^43.713%ID^E:4.17e-32^RecName: Full=Protein SERAC1;^Eukaryota; Metazoa; Chordata; Craniata; Vertebrata; Euteleostomi; Mammalia; Eutheria; Laurasiatheria; Cetartiodactyla; Ruminantia; Pecora; Bovidae; Bovinae; Bos	Gene.50235::c28206_g1_i4::g.50235::m.50235	3395-33[-]	.	ENOG410YIPC^serine active site containing 1	KEGG:bta:519860	GO:0005783^cellular_component^endoplasmic reticulum`GO:0016021^cellular_component^integral component of membrane`GO:0005739^cellular_component^mitochondrion`GO:0005654^cellular_component^nucleoplasm`GO:0005578^cellular_component^proteinaceous extracellular matrix`GO:0016788^molecular_function^hydrolase activity, acting on ester bonds`GO:0030198^biological_process^extracellular matrix organization…	.
c28735_g1_i4	-4.43121	1.45990142701112e-05	0.00705614432170383	c28735_g1	CSA1_ARATH^CSA1_ARATH^Q:1882-611,H:521-904^35.648%ID^E:1.04e-56^RecName: Full=Disease resistance-like protein CSA1 {ECO:0000305};^Eukaryota; Viridiplantae; Streptophyta; Embryophyta; Tracheophyta; Spermatophyta; Magnoliophyta; eudicotyledons; Gunneridae; Pentapetalae; rosids; malvids; Brassicales; Brassicaceae; Camelineae; Arabidopsis`CSA1_ARATH^CSA1_ARATH^Q:1210-161,H:637-935^32.113%ID^E:2.43e-3…	Gene.55439::c28735_g1_i4::g.55439::m.55439	1882-80[-]	PF07725.9^LRR_3^Leucine Rich Repeat^155-172^E:0.00032`PF00560.30^LRR_1^Leucine Rich Repeat^385-405^E:0.71	COG4886^leucine Rich Repeat	KEGG:ath:AT5G17880	GO:0043531^molecular_function^ADP binding`GO:0005524^molecular_function^ATP binding`GO:0042742^biological_process^defense response to bacterium`GO:0007275^biological_process^multicellular organism development`GO:0009416^biological_process^response to light stimulus`GO:0010114^biological_process^response to red light`GO:0007165^biological_process^signal transduction	GO:0005515^molecular_function^protein binding
c23402_g1_i1	-5.32346	1.33643246160873e-09	2.32099811205424e-06	c23402_g1	ART3_YEAST^ART3_YEAST^Q:238-86,H:1-52^88.462%ID^E:7.59e-24^RecName: Full=Putative uncharacterized protein ART3;^Eukaryota; Fungi; Dikarya; Ascomycota; Saccharomycotina; Saccharomycetes; Saccharomycetales; Saccharomycetaceae; Saccharomyces	.	.	.	.	.	.	.
c29448_g7_i8	-5.38004	1.39347949169415e-05	0.00676702699506791	c29448_g7	ALA3_ARATH^ALA3_ARATH^Q:3002-1074,H:322-957^82.115%ID^E:0^RecName: Full=Phospholipid-transporting ATPase 3 {ECO:0000303|PubMed:11402198};^Eukaryota; Viridiplantae; Streptophyta; Embryophyta; Tracheophyta; Spermatophyta; Magnoliophyta; eudicotyledons; Gunneridae; Pentapetalae; rosids; malvids; Brassicales; Brassicaceae; Camelineae; Arabidopsis`ALA3_ARATH^ALA3_ARATH^Q:918-148,H:957-1213^77.821%ID^E…	Gene.63284::c29448_g7_i8::g.63284::m.63284	3002-1047[-]	PF13246.3^Cation_ATPase^Cation transport ATPase (P-type)^197-289^E:6e-11`PF16212.2^PhoLip_ATPase_C^Phospholipid-translocating P-type ATPase C-terminal^557-645^E:2.5e-42	ENOG410XPYK^Phospholipid-transporting atpase	KEGG:ath:AT1G59820`KO:K14802	GO:0005789^cellular_component^endoplasmic reticulum membrane`GO:0005768^cellular_component^endosome`GO:0005794^cellular_component^Golgi apparatus`GO:0000139^cellular_component^Golgi membrane`GO:0016021^cellular_component^integral component of membrane`GO:0005886^cellular_component^plasma membrane`GO:0005802^cellular_component^trans-Golgi network`GO:0005524^molecular_function^ATP binding`GO:000028…	.
c27880_g5_i3	-5.5099	4.02133917140734e-56	1.37350179845808e-51	c27880_g5	.	Gene.47279::c27880_g5_i3::g.47279::m.47279	2-388[+]	.	.	.	.	.
c28122_g1_i4	-5.61371	1.39007886503993e-06	0.000996054692204065	c28122_g1	.	.	.	.	.	.	.	.
c31473_g3_i2	-6.19056	1.42795624245712e-15	5.85267857358447e-12	c31473_g3	.	.	.	.	.	.	.	.
c29563_g1_i8	-6.4114	3.81347758388307e-08	4.5970799307078e-05	c29563_g1	LSF1_ARATH^LSF1_ARATH^Q:1257-2126,H:137-430^70.748%ID^E:2.35e-131^RecName: Full=Phosphoglucan phosphatase LSF1, chloroplastic;^Eukaryota; Viridiplantae; Streptophyta; Embryophyta; Tracheophyta; Spermatophyta; Magnoliophyta; eudicotyledons; Gunneridae; Pentapetalae; rosids; malvids; Brassicales; Brassicaceae; Camelineae; Arabidopsis`LSF1_ARATH^LSF1_ARATH^Q:3942-4223,H:497-590^71.277%ID^E:2.49e-37^…	Gene.64397::c29563_g1_i8::g.64397::m.64397	1386-2147[+]	PF00782.17^DSPc^Dual specificity phosphatase, catalytic domain^117-238^E:7.4e-13	ENOG411126M^Dual specificity phosphatase, catalytic domain	KEGG:ath:AT3G01510	GO:0009507^cellular_component^chloroplast`GO:0009569^cellular_component^chloroplast starch grain`GO:0009570^cellular_component^chloroplast stroma`GO:0043036^cellular_component^starch grain`GO:0019203^molecular_function^carbohydrate phosphatase activity`GO:0008138^molecular_function^protein tyrosine/serine/threonine phosphatase activity`GO:0005983^biological_process^starch catabolic process	GO:0008138^molecular_function^protein tyrosine/serine/threonine phosphatase activity`GO:0006470^biological_process^protein dephosphorylation
c30708_g1_i13	-6.4547	1.63229345043951e-31	1.85838422991927e-27	c30708_g1	TAR1_KLULA^TAR1_KLULA^Q:379-71,H:7-109^60.748%ID^E:4.86e-28^RecName: Full=Protein TAR1;^Eukaryota; Fungi; Dikarya; Ascomycota; Saccharomycotina; Saccharomycetes; Saccharomycetales; Saccharomycetaceae; Kluyveromyces	.	.	.	ENOG410Y21X^NA	KEGG:kla:KLLA0D17600g`KEGG:kla:KLLA0D17732g`KEGG:kla:KLLA0D17864g	GO:0005739^cellular_component^mitochondrion	.
c28078_g1_i3	-6.70513	1.77250272302287e-05	0.00833125064299366	c28078_g1	LRP1A_ARATH^LRP1A_ARATH^Q:855-2726,H:196-782^54.762%ID^E:0^RecName: Full=La-related protein 1A;^Eukaryota; Viridiplantae; Streptophyta; Embryophyta; Tracheophyta; Spermatophyta; Magnoliophyta; eudicotyledons; Gunneridae; Pentapetalae; rosids; malvids; Brassicales; Brassicaceae; Camelineae; Arabidopsis	Gene.49027::c28078_g1_i3::g.49027::m.49027	276-2774[+]	PF05383.14^La^La domain^276-330^E:5.9e-21	COG5193^La ribonucleoprotein domain family member	.	GO:0000932^cellular_component^cytoplasmic mRNA processing body`GO:0005829^cellular_component^cytosol`GO:0005844^cellular_component^polysome`GO:0003723^molecular_function^RNA binding`GO:0010286^biological_process^heat acclimation`GO:0006402^biological_process^mRNA catabolic process	.
c27880_g2_i1	-7.23419	9.29896864184885e-21	6.35218747237123e-17	c27880_g2	M030_ARATH^M030_ARATH^Q:185-3,H:1-61^95.082%ID^E:3.49e-38^RecName: Full=Uncharacterized mitochondrial protein AtMg00030;^Eukaryota; Viridiplantae; Streptophyta; Embryophyta; Tracheophyta; Spermatophyta; Magnoliophyta; eudicotyledons; Gunneridae; Pentapetalae; rosids; malvids; Brassicales; Brassicaceae; Camelineae; Arabidopsis	.	.	.	ENOG410Z9WV^NA	KEGG:ath:ArthMp003	GO:0005739^cellular_component^mitochondrion	.
c28563_g1_i1	-7.38794	1.26404627430895e-08	1.66053545568386e-05	c28563_g1	.	Gene.53630::c28563_g1_i1::g.53630::m.53630	2782-575[-]	PF12043.5^DUF3527^Domain of unknown function (DUF3527)^327-668^E:3.6e-109	.	.	.	.
c20908_g1_i3	-9.21876	2.88859659596684e-29	2.69075398911216e-25	c20908_g1	ING1_ARATH^ING1_ARATH^Q:1191-481,H:1-234^71.13%ID^E:1.07e-99^RecName: Full=PHD finger protein ING1;^Eukaryota; Viridiplantae; Streptophyta; Embryophyta; Tracheophyta; Spermatophyta; Magnoliophyta; eudicotyledons; Gunneridae; Pentapetalae; rosids; malvids; Brassicales; Brassicaceae; Camelineae; Arabidopsis	Gene.10364::c20908_g1_i3::g.10364::m.10364	1191-478[-]	PF12998.4^ING^Inhibitor of growth proteins N-terminal histone-binding^3-111^E:1.9e-20	COG5034^Inhibitor of growth family member	KEGG:ath:AT3G24010`KO:K11346	GO:0005634^cellular_component^nucleus`GO:0035064^molecular_function^methylated histone binding`GO:0008270^molecular_function^zinc ion binding`GO:0016568^biological_process^chromatin modification`GO:0040008^biological_process^regulation of growth`GO:0006355^biological_process^regulation of transcription, DNA-templated`GO:0006351^biological_process^transcription, DNA-templated	.
c29870_g1_i3	-9.31363	6.86886774439481e-57	3.51912701148579e-52	c29870_g1	AB4C_ARATH^AB4C_ARATH^Q:357-4793,H:28-1516^72.533%ID^E:0^RecName: Full=ABC transporter C family member 4;^Eukaryota; Viridiplantae; Streptophyta; Embryophyta; Tracheophyta; Spermatophyta; Magnoliophyta; eudicotyledons; Gunneridae; Pentapetalae; rosids; malvids; Brassicales; Brassicaceae; Camelineae; Arabidopsis	Gene.67683::c29870_g1_i3::g.67683::m.67683	282-4796[+]	PF00664.20^ABC_membrane^ABC transporter transmembrane region^330-596^E:1.2e-26`PF00005.24^ABC_tran^ABC transporter^661-794^E:2.6e-19`PF00664.20^ABC_membrane^ABC transporter transmembrane region^978-1198^E:1.8e-30`PF00005.24^ABC_tran^ABC transporter^1279-1427^E:1.1e-28	COG1132^(ABC) transporter	KEGG:ath:AT2G47800	GO:0005794^cellular_component^Golgi apparatus`GO:0016021^cellular_component^integral component of membrane`GO:0000325^cellular_component^plant-type vacuole`GO:0005886^cellular_component^plasma membrane`GO:0009506^cellular_component^plasmodesma`GO:0005774^cellular_component^vacuolar membrane`GO:0005773^cellular_component^vacuole`GO:0005524^molecular_function^ATP binding`GO:0042626^molecular_functi…	GO:0005524^molecular_function^ATP binding`GO:0042626^molecular_function^ATPase activity, coupled to transmembrane movement of substances`GO:0006810^biological_process^transport`GO:0055085^biological_process^transmembrane transport`GO:0016021^cellular_component^integral component of membrane`GO:0016887^molecular_function^ATPase activity
c30055_g2_i7	-Inf	1.38120892568069e-47	3.53817384446995e-43	c30055_g2	LEAD8_DAUCA^LEAD8_DAUCA^Q:2287-1613,H:171-409^50%ID^E:2.29e-28^RecName: Full=Embryonic protein DC-8;^Eukaryota; Viridiplantae; Streptophyta; Embryophyta; Tracheophyta; Spermatophyta; Magnoliophyta; eudicotyledons; Gunneridae; Pentapetalae; asterids; campanulids; Apiales; Apiaceae; Apioideae; Scandiceae; Daucinae; Daucus`LEAD8_DAUCA^LEAD8_DAUCA^Q:2323-1628,H:50-294^47.347%ID^E:1.94e-23^RecName: Fu…	Gene.69555::c30055_g2_i7::g.69555::m.69555	2479-1373[-]	PF01442.15^Apolipoprotein^Apolipoprotein A1/A4/E domain^81-202^E:0.091`PF01442.15^Apolipoprotein^Apolipoprotein A1/A4/E domain^145-308^E:0.00014`PF02987.13^LEA_4^Late embryogenesis abundant protein^151-193^E:3.4e-15`PF02987.13^LEA_4^Late embryogenesis abundant protein^184-227^E:3.4e-16`PF02987.13^LEA_4^Late embryogenesis abundant protein^228-271^E:1.1e-16`PF01442.15^Apolipoprotein^Apolipoprotein …	.	.	GO:0005618^cellular_component^cell wall`GO:0005737^cellular_component^cytoplasm`GO:0005576^cellular_component^extracellular region	GO:0008289^molecular_function^lipid binding`GO:0006869^biological_process^lipid transport`GO:0042157^biological_process^lipoprotein metabolic process`GO:0005576^cellular_component^extracellular region
c20285_g1_i1	-Inf	1.83001154898698e-45	3.75027926756999e-41	c20285_g1	.	Gene.8701::c20285_g1_i1::g.8701::m.8701	60-404[+]	.	.	.	.	.
c20285_g2_i1	-Inf	9.76499098502516e-44	1.66763261045265e-39	c20285_g2	.	.	.	.	.	.	.	.
c27495_g7_i6	-Inf	2.13882531966963e-38	3.1308125029324e-34	c27495_g7	VIP5_ARATH^VIP5_ARATH^Q:253-2196,H:1-643^63.83%ID^E:0^RecName: Full=Protein RTF1 homolog {ECO:0000305};^Eukaryota; Viridiplantae; Streptophyta; Embryophyta; Tracheophyta; Spermatophyta; Magnoliophyta; eudicotyledons; Gunneridae; Pentapetalae; rosids; malvids; Brassicales; Brassicaceae; Camelineae; Arabidopsis	Gene.43795::c27495_g7_i6::g.43795::m.43795	253-2199[+]	PF03126.15^Plus-3^Plus-3 domain^263-368^E:1.2e-31	COG5296^Rtf1, Paf1 RNA polymerase II complex component, homolog (S. cerevisiae)	KEGG:ath:AT1G61040`KO:K15178	GO:0016593^cellular_component^Cdc73/Paf1 complex`GO:0003677^molecular_function^DNA binding`GO:0006352^biological_process^DNA-templated transcription, initiation`GO:0009908^biological_process^flower development`GO:0016570^biological_process^histone modification`GO:0009910^biological_process^negative regulation of flower development`GO:0045893^biological_process^positive regulation of transcription…	GO:0003677^molecular_function^DNA binding
c29888_g6_i1	-Inf	1.38979008793568e-32	1.78007788938021e-28	c29888_g6	DCL1_ARATH^DCL1_ARATH^Q:6407-510,H:13-1909^75.076%ID^E:0^RecName: Full=Endoribonuclease Dicer homolog 1;^Eukaryota; Viridiplantae; Streptophyta; Embryophyta; Tracheophyta; Spermatophyta; Magnoliophyta; eudicotyledons; Gunneridae; Pentapetalae; rosids; malvids; Brassicales; Brassicaceae; Camelineae; Arabidopsis	Gene.67901::c29888_g6_i1::g.67901::m.67901	6458-507[-]	PF00270.26^DEAD^DEAD/DEAH box helicase^324-486^E:1.8e-13`PF04851.12^ResIII^Type III restriction enzyme, res subunit^325-487^E:1.8e-13`PF00271.28^Helicase_C^Helicase conserved C-terminal domain^724-841^E:1.8e-16`PF03368.11^Dicer_dimer^Dicer dimerisation domain^916-1004^E:6.3e-24`PF02170.19^PAZ^PAZ domain^1275-1419^E:3.6e-25`PF00636.23^Ribonuclease_3^Ribonuclease III domain^1456-1604^E:3.6e-29`PF14…	COG0571^Digests double-stranded RNA. Involved in the processing of primary rRNA transcript to yield the immediate precursors to the large and small rRNAs (23S and 16S). Also processes some mRNAs, and tRNAs when they are encoded in the rRNA operon (By similarity)`COG1111^helicase	.	GO:0005634^cellular_component^nucleus`GO:0005524^molecular_function^ATP binding`GO:0003677^molecular_function^DNA binding`GO:0004386^molecular_function^helicase activity`GO:0046872^molecular_function^metal ion binding`GO:0004525^molecular_function^ribonuclease III activity`GO:0003723^molecular_function^RNA binding`GO:0031047^biological_process^gene silencing by RNA`GO:0006396^biological_process^R…	GO:0003676^molecular_function^nucleic acid binding`GO:0005524^molecular_function^ATP binding`GO:0003677^molecular_function^DNA binding`GO:0016787^molecular_function^hydrolase activity`GO:0016891^molecular_function^endoribonuclease activity, producing 5'-phosphomonoesters`GO:0005515^molecular_function^protein binding`GO:0003723^molecular_function^RNA binding`GO:0004525^molecular_function^ribonucle…
c15514_g1_i1	-Inf	2.7600844525913e-23	2.17549856553247e-19	c15514_g1	.	.	.	.	.	.	.	.
c22938_g1_i4	-Inf	3.84153589454168e-21	2.81162012121506e-17	c22938_g1	ALG5_DROME^ALG5_DROME^Q:1232-327,H:38-319^44.884%ID^E:1.33e-79^RecName: Full=Dolichyl-phosphate beta-glucosyltransferase {ECO:0000250|UniProtKB:Q9Y673};^Eukaryota; Metazoa; Ecdysozoa; Arthropoda; Hexapoda; Insecta; Pterygota; Neoptera; Endopterygota; Diptera; Brachycera; Muscomorpha; Ephydroidea; Drosophilidae; Drosophila; Sophophora	Gene.16976::c22938_g1_i4::g.16976::m.16976	1328-321[-]	PF00535.23^Glycos_transf_2^Glycosyl transferase family 2^69-182^E:2.5e-22	COG0463^Glycosyl transferase, family 2	KEGG:dme:Dmel_CG7870`KO:K00729	GO:0005783^cellular_component^endoplasmic reticulum`GO:0005789^cellular_component^endoplasmic reticulum membrane`GO:0016021^cellular_component^integral component of membrane`GO:0004582^molecular_function^dolichyl-phosphate beta-D-mannosyltransferase activity`GO:0004581^molecular_function^dolichyl-phosphate beta-glucosyltransferase activity`GO:0004169^molecular_function^dolichyl-phosphate-mannose-…	.
c30709_g2_i2	-Inf	2.48027803896802e-20	1.58840105963061e-16	c30709_g2	PNP1_ARATH^PNP1_ARATH^Q:113-2848,H:1-916^70.933%ID^E:0^RecName: Full=Polyribonucleotide nucleotidyltransferase 1, chloroplastic;^Eukaryota; Viridiplantae; Streptophyta; Embryophyta; Tracheophyta; Spermatophyta; Magnoliophyta; eudicotyledons; Gunneridae; Pentapetalae; rosids; malvids; Brassicales; Brassicaceae; Camelineae; Arabidopsis	Gene.77026::c30709_g2_i2::g.77026::m.77026	113-3010[+]	PF01138.18^RNase_PH^3' exoribonuclease family, domain 1^102-230^E:5.4e-13`PF03725.12^RNase_PH_C^3' exoribonuclease family, domain 2^234-297^E:2.9e-13`PF01138.18^RNase_PH^3' exoribonuclease family, domain 1^459-592^E:9e-23`PF03725.12^RNase_PH_C^3' exoribonuclease family, domain 2^597-671^E:5.1e-05`PF00013.26^KH_1^KH domain^700-756^E:1.6e-05`PF00575.20^S1^S1 RNA binding domain^772-834^E:2.3e-12	COG1185^Involved in mRNA degradation. Hydrolyzes single-stranded polyribonucleotides processively in the 3'- to 5'-direction (By similarity)	KEGG:ath:AT3G03710`KO:K00962	GO:0009507^cellular_component^chloroplast`GO:0009570^cellular_component^chloroplast stroma`GO:0000175^molecular_function^3'-5'-exoribonuclease activity`GO:0004654^molecular_function^polyribonucleotide nucleotidyltransferase activity`GO:0003723^molecular_function^RNA binding`GO:0016120^biological_process^carotene biosynthetic process`GO:0016036^biological_process^cellular response to phosphate sta…	GO:0003723^molecular_function^RNA binding`GO:0003676^molecular_function^nucleic acid binding
c26241_g6_i5	-Inf	1.44931193408322e-18	8.25028870209841e-15	c26241_g6	RB47B_ARATH^RB47B_ARATH^Q:1316-531,H:103-366^73.864%ID^E:1.03e-132^RecName: Full=Polyadenylate-binding protein RBP47B;^Eukaryota; Viridiplantae; Streptophyta; Embryophyta; Tracheophyta; Spermatophyta; Magnoliophyta; eudicotyledons; Gunneridae; Pentapetalae; rosids; malvids; Brassicales; Brassicaceae; Camelineae; Arabidopsis`RB47B_ARATH^RB47B_ARATH^Q:1298-801,H:203-388^26.425%ID^E:1.83e-07^RecName…	Gene.34023::c26241_g6_i5::g.34023::m.34023	1715-507[-]	PF00076.19^RRM_1^RNA recognition motif. (a.k.a. RRM, RBD, or RNP domain)^141-209^E:6.6e-14`PF00076.19^RRM_1^RNA recognition motif. (a.k.a. RRM, RBD, or RNP domain)^233-301^E:6.2e-16`PF00076.19^RRM_1^RNA recognition motif. (a.k.a. RRM, RBD, or RNP domain)^352-395^E:2.9e-10	COG0724^Rna-binding protein	KEGG:ath:AT3G19130	GO:0010494^cellular_component^cytoplasmic stress granule`GO:0005829^cellular_component^cytosol`GO:0005634^cellular_component^nucleus`GO:0000166^molecular_function^nucleotide binding`GO:0008143^molecular_function^poly(A) binding`GO:0034605^biological_process^cellular response to heat`GO:0006397^biological_process^mRNA processing	GO:0003676^molecular_function^nucleic acid binding
c29201_g1_i2	-Inf	1.31560159642157e-17	7.09497016731224e-14	c29201_g1	RA212_ARATH^RA212_ARATH^Q:130-1323,H:1-358^47.115%ID^E:2e-70^RecName: Full=Ethylene-responsive transcription factor RAP2-12;^Eukaryota; Viridiplantae; Streptophyta; Embryophyta; Tracheophyta; Spermatophyta; Magnoliophyta; eudicotyledons; Gunneridae; Pentapetalae; rosids; malvids; Brassicales; Brassicaceae; Camelineae; Arabidopsis	Gene.60752::c29201_g1_i2::g.60752::m.60752	130-1326[+]	PF00847.17^AP2^AP2 domain^123-171^E:4.2e-12	ENOG410YERP^Transcription factor	KEGG:ath:AT1G53910`KO:K09286	GO:0005634^cellular_component^nucleus`GO:0005886^cellular_component^plasma membrane`GO:0003677^molecular_function^DNA binding`GO:0003700^molecular_function^transcription factor activity, sequence-specific DNA binding`GO:0070483^biological_process^detection of hypoxia`GO:0009873^biological_process^ethylene-activated signaling pathway`GO:0001666^biological_process^response to hypoxia`GO:0006351^bio…	GO:0003700^molecular_function^transcription factor activity, sequence-specific DNA binding`GO:0006355^biological_process^regulation of transcription, DNA-templated
c28093_g1_i5	-Inf	3.97993724406894e-17	1.94194404595604e-13	c28093_g1	BRM_ARATH^BRM_ARATH^Q:3697-6564,H:1045-1985^74.922%ID^E:0^RecName: Full=ATP-dependent helicase BRM;^Eukaryota; Viridiplantae; Streptophyta; Embryophyta; Tracheophyta; Spermatophyta; Magnoliophyta; eudicotyledons; Gunneridae; Pentapetalae; rosids; malvids; Brassicales; Brassicaceae; Camelineae; Arabidopsis`BRM_ARATH^BRM_ARATH^Q:624-3647,H:64-1061^62.755%ID^E:0^RecName: Full=ATP-dependent helicase …	Gene.49288::c28093_g1_i5::g.49288::m.49288	426-3707[+]	PF08880.8^QLQ^QLQ^480-513^E:6.2e-10`PF00176.20^SNF2_N^SNF2 family N-terminal domain^1013-1070^E:1.8e-12	COG0553^helicase	KEGG:ath:AT2G46020`KO:K11647	GO:0005829^cellular_component^cytosol`GO:0005634^cellular_component^nucleus`GO:0005524^molecular_function^ATP binding`GO:0003682^molecular_function^chromatin binding`GO:0003677^molecular_function^DNA binding`GO:0008094^molecular_function^DNA-dependent ATPase activity`GO:0004386^molecular_function^helicase activity`GO:0043044^biological_process^ATP-dependent chromatin remodeling`GO:0010199^biologi…	GO:0005524^molecular_function^ATP binding`GO:0006355^biological_process^regulation of transcription, DNA-templated`GO:0005634^cellular_component^nucleus
c31008_g2_i6	-Inf	9.5501283497484e-16	4.25462370211008e-12	c31008_g2	TPS1_ARATH^TPS1_ARATH^Q:330-1679,H:1-463^80.645%ID^E:0^RecName: Full=Alpha,alpha-trehalose-phosphate synthase [UDP-forming] 1;^Eukaryota; Viridiplantae; Streptophyta; Embryophyta; Tracheophyta; Spermatophyta; Magnoliophyta; eudicotyledons; Gunneridae; Pentapetalae; rosids; malvids; Brassicales; Brassicaceae; Camelineae; Arabidopsis	Gene.80521::c31008_g2_i6::g.80521::m.80521	81-1685[+]	PF00982.18^Glyco_transf_20^Glycosyltransferase family 20^163-532^E:5.8e-136	COG0380^synthase`COG1877^trehalose biosynthetic process	KEGG:ath:AT1G78580`KO:K16055	GO:0005618^cellular_component^cell wall`GO:0005576^cellular_component^extracellular region`GO:0005773^cellular_component^vacuole`GO:0003825^molecular_function^alpha,alpha-trehalose-phosphate synthase (UDP-forming) activity`GO:0051301^biological_process^cell division`GO:0009793^biological_process^embryo development ending in seed dormancy`GO:0009832^biological_process^plant-type cell wall biogenes…	GO:0003824^molecular_function^catalytic activity`GO:0005992^biological_process^trehalose biosynthetic process
c19899_g1_i2	-Inf	1.12013975813546e-15	4.78234335237949e-12	c19899_g1	RRP2_SPIOL^RRP2_SPIOL^Q:309-839,H:84-260^81.356%ID^E:2.21e-84^RecName: Full=30S ribosomal protein 2, chloroplastic;^Eukaryota; Viridiplantae; Streptophyta; Embryophyta; Tracheophyta; Spermatophyta; Magnoliophyta; eudicotyledons; Gunneridae; Pentapetalae; Caryophyllales; Amaranthaceae; Chenopodioideae; Anserineae; Spinacia	Gene.7933::c19899_g1_i2::g.7933::m.7933	93-842[+]	PF00076.19^RRM_1^RNA recognition motif. (a.k.a. RRM, RBD, or RNP domain)^75-145^E:5.8e-23`PF13893.3^RRM_5^RNA recognition motif. (a.k.a. RRM, RBD, or RNP domain)^83-149^E:0.13`PF00076.19^RRM_1^RNA recognition motif. (a.k.a. RRM, RBD, or RNP domain)^175-245^E:5e-19`PF13893.3^RRM_5^RNA recognition motif. (a.k.a. RRM, RBD, or RNP domain)^182-246^E:0.022	.	.	GO:0009507^cellular_component^chloroplast`GO:0005840^cellular_component^ribosome`GO:0000166^molecular_function^nucleotide binding`GO:0019843^molecular_function^rRNA binding	GO:0003676^molecular_function^nucleic acid binding
c26084_g1_i2	-Inf	3.42610403343334e-15	1.30021916996215e-11	c26084_g1	KC1D_ARATH^KC1D_ARATH^Q:335-1384,H:1-349^70.538%ID^E:9.47e-167^RecName: Full=Casein kinase I isoform delta-like;^Eukaryota; Viridiplantae; Streptophyta; Embryophyta; Tracheophyta; Spermatophyta; Magnoliophyta; eudicotyledons; Gunneridae; Pentapetalae; rosids; malvids; Brassicales; Brassicaceae; Camelineae; Arabidopsis	Gene.33028::c26084_g1_i2::g.33028::m.33028	335-1636[+]	PF00069.22^Pkinase^Protein kinase domain^9-227^E:3.3e-29`PF07714.14^Pkinase_Tyr^Protein tyrosine kinase^10-268^E:1.8e-15	ENOG410XPGP^Casein Kinase	KEGG:ath:AT4G26100`KO:K02218	GO:0005737^cellular_component^cytoplasm`GO:0009506^cellular_component^plasmodesma`GO:0005524^molecular_function^ATP binding`GO:0004674^molecular_function^protein serine/threonine kinase activity`GO:0018105^biological_process^peptidyl-serine phosphorylation`GO:0016055^biological_process^Wnt signaling pathway	GO:0004672^molecular_function^protein kinase activity`GO:0005524^molecular_function^ATP binding`GO:0006468^biological_process^protein phosphorylation
c31157_g1_i3	-Inf	2.62358280278716e-13	8.96093451567963e-10	c31157_g1	Y1439_ARATH^Y1439_ARATH^Q:3268-263,H:10-1000^46.39%ID^E:0^RecName: Full=BTB/POZ domain-containing protein At1g04390;^Eukaryota; Viridiplantae; Streptophyta; Embryophyta; Tracheophyta; Spermatophyta; Magnoliophyta; eudicotyledons; Gunneridae; Pentapetalae; rosids; malvids; Brassicales; Brassicaceae; Camelineae; Arabidopsis	Gene.82168::c31157_g1_i3::g.82168::m.82168	3319-245[-]	PF00651.28^BTB^BTB/POZ domain^852-927^E:6.4e-10	ENOG410YBFM^BTB POZ domain-containing protein	KEGG:ath:AT1G04390	GO:0016567^biological_process^protein ubiquitination	GO:0005515^molecular_function^protein binding
c27942_g1_i1	-Inf	1.09200121233261e-11	2.94455253218088e-08	c27942_g1	G3BP_SCHPO^G3BP_SCHPO^Q:3811-3476,H:17-130^39.316%ID^E:3.61e-14^RecName: Full=Putative G3BP-like protein;^Eukaryota; Fungi; Dikarya; Ascomycota; Taphrinomycotina; Schizosaccharomycetes; Schizosaccharomycetales; Schizosaccharomycetaceae; Schizosaccharomyces	Gene.47830::c27942_g1_i1::g.47830::m.47830	3847-2627[-]	PF02136.17^NTF2^Nuclear transport factor 2 (NTF2) domain^14-128^E:3.4e-25`PF00076.19^RRM_1^RNA recognition motif. (a.k.a. RRM, RBD, or RNP domain)^320-377^E:3.3e-10	.	KEGG:spo:SPBP8B7.11	GO:0005737^cellular_component^cytoplasm`GO:0005829^cellular_component^cytosol`GO:0000166^molecular_function^nucleotide binding`GO:0003723^molecular_function^RNA binding`GO:0051028^biological_process^mRNA transport`GO:0016579^biological_process^protein deubiquitination`GO:0060628^biological_process^regulation of ER to Golgi vesicle-mediated transport	GO:0006810^biological_process^transport`GO:0005622^cellular_component^intracellular`GO:0003676^molecular_function^nucleic acid binding
c27020_g1_i4	-Inf	1.28508277024071e-11	3.29193227838712e-08	c27020_g1	GRDP2_ARATH^GRDP2_ARATH^Q:305-2356,H:17-679^56.977%ID^E:0^RecName: Full=Glycine-rich domain-containing protein 2 {ECO:0000303|PubMed:25653657};^Eukaryota; Viridiplantae; Streptophyta; Embryophyta; Tracheophyta; Spermatophyta; Magnoliophyta; eudicotyledons; Gunneridae; Pentapetalae; rosids; malvids; Brassicales; Brassicaceae; Camelineae; Arabidopsis	Gene.40141::c27020_g1_i4::g.40141::m.40141	257-2686[+]	PF07173.9^DUF1399^Protein of unknown function (DUF1399)^14-100^E:1.7e-10`PF07173.9^DUF1399^Protein of unknown function (DUF1399)^96-240^E:4.6e-52	ENOG4111FEQ^Protein of unknown function (DUF1399)	KEGG:ath:AT2G22660	GO:0005886^cellular_component^plasma membrane`GO:0009738^biological_process^abscisic acid-activated signaling pathway`GO:0071470^biological_process^cellular response to osmotic stress`GO:0009787^biological_process^regulation of abscisic acid-activated signaling pathway	.
c31187_g1_i5	-Inf	1.28508277024071e-11	3.29193227838712e-08	c31187_g1	GDL74_ARATH^GDL74_ARATH^Q:319-1506,H:7-321^38.384%ID^E:4.46e-76^RecName: Full=GDSL esterase/lipase At5g03980;^Eukaryota; Viridiplantae; Streptophyta; Embryophyta; Tracheophyta; Spermatophyta; Magnoliophyta; eudicotyledons; Gunneridae; Pentapetalae; rosids; malvids; Brassicales; Brassicaceae; Camelineae; Arabidopsis	Gene.82505::c31187_g1_i5::g.82505::m.82505	4342-1868[-]	PF00168.27^C2^C2 domain^291-397^E:0.00026`PF00168.27^C2^C2 domain^483-580^E:2.1e-18`PF00168.27^C2^C2 domain^615-711^E:4.7e-19	COG5038^Domain-Containing protein	KEGG:ath:AT1G05500	GO:0012505^cellular_component^endomembrane system`GO:0005783^cellular_component^endoplasmic reticulum`GO:0016021^cellular_component^integral component of membrane`GO:0005886^cellular_component^plasma membrane`GO:0009506^cellular_component^plasmodesma`GO:0008289^molecular_function^lipid binding`GO:0046872^molecular_function^metal ion binding	GO:0005515^molecular_function^protein binding
c23560_g1_i3	-Inf	3.41751834527551e-11	7.78176521704445e-08	c23560_g1	Y1668_ARATH^Y1668_ARATH^Q:551-2602,H:26-681^40.521%ID^E:3.05e-151^RecName: Full=Probable inactive leucine-rich repeat receptor-like protein kinase At1g66830;^Eukaryota; Viridiplantae; Streptophyta; Embryophyta; Tracheophyta; Spermatophyta; Magnoliophyta; eudicotyledons; Gunneridae; Pentapetalae; rosids; malvids; Brassicales; Brassicaceae; Camelineae; Arabidopsis	Gene.19450::c23560_g1_i3::g.19450::m.19450	476-2611[+]	PF08263.9^LRRNT_2^Leucine rich repeat N-terminal domain^23-63^E:5e-10`PF13855.3^LRR_8^Leucine rich repeat^98-156^E:9.9e-07`PF13855.3^LRR_8^Leucine rich repeat^144-205^E:1.8e-06`PF00560.30^LRR_1^Leucine Rich Repeat^145-167^E:0.13`PF00069.22^Pkinase^Protein kinase domain^417-636^E:2.1e-33`PF07714.14^Pkinase_Tyr^Protein tyrosine kinase^418-706^E:3.8e-29	COG4886^leucine Rich Repeat	KEGG:ath:AT1G66830	GO:0016021^cellular_component^integral component of membrane`GO:0005886^cellular_component^plasma membrane`GO:0005524^molecular_function^ATP binding`GO:0004672^molecular_function^protein kinase activity	GO:0005515^molecular_function^protein binding`GO:0004672^molecular_function^protein kinase activity`GO:0005524^molecular_function^ATP binding`GO:0006468^biological_process^protein phosphorylation
c21777_g1_i4	-Inf	6.56757120412708e-11	1.46294076304801e-07	c21777_g1	PPR52_ARATH^PPR52_ARATH^Q:146-2815,H:1-894^58.324%ID^E:0^RecName: Full=Pentatricopeptide repeat-containing protein At1g19720;^Eukaryota; Viridiplantae; Streptophyta; Embryophyta; Tracheophyta; Spermatophyta; Magnoliophyta; eudicotyledons; Gunneridae; Pentapetalae; rosids; malvids; Brassicales; Brassicaceae; Camelineae; Arabidopsis	Gene.12805::c21777_g1_i4::g.12805::m.12805	146-2818[+]	PF01535.17^PPR^PPR repeat^120-144^E:0.0006`PF01535.17^PPR^PPR repeat^146-176^E:0.00013`PF01535.17^PPR^PPR repeat^219-244^E:0.015`PF12854.4^PPR_1^PPR repeat^244-273^E:2e-08`PF13041.3^PPR_2^PPR repeat family^245-291^E:5.9e-16`PF13812.3^PPR_3^Pentatricopeptide repeat domain^245-291^E:3.5e-07`PF01535.17^PPR^PPR repeat^247-277^E:6.5e-10`PF12854.4^PPR_1^PPR repeat^275-308^E:8.6e-06`PF13041.3^PPR_2^PPR …	ENOG410Z7Z7^Pentatricopeptide repeat-containing protein	KEGG:ath:AT1G19720	GO:0009507^cellular_component^chloroplast`GO:0005737^cellular_component^cytoplasm`GO:0005634^cellular_component^nucleus	GO:0008270^molecular_function^zinc ion binding
c27974_g2_i2	-Inf	9.10760676589873e-11	1.98557454228634e-07	c27974_g2	.	Gene.48113::c27974_g2_i2::g.48113::m.48113	2812-329[-]	PF02892.12^zf-BED^BED zinc finger^69-106^E:1.4e-08`PF04937.12^DUF659^Protein of unknown function (DUF 659)^279-430^E:5.2e-56`PF05699.11^Dimer_Tnp_hAT^hAT family C-terminal dimerisation region^650-720^E:2.3e-10	.	.	.	GO:0003677^molecular_function^DNA binding`GO:0046983^molecular_function^protein dimerization activity
c24381_g1_i4	-Inf	1.26329724692786e-10	2.64173501436144e-07	c24381_g1	PP270_ARATH^PP270_ARATH^Q:182-2173,H:1-650^57.25%ID^E:0^RecName: Full=Pentatricopeptide repeat-containing protein At3g48810;^Eukaryota; Viridiplantae; Streptophyta; Embryophyta; Tracheophyta; Spermatophyta; Magnoliophyta; eudicotyledons; Gunneridae; Pentapetalae; rosids; malvids; Brassicales; Brassicaceae; Camelineae; Arabidopsis	Gene.23183::c24381_g1_i4::g.23183::m.23183	182-2188[+]	PF13812.3^PPR_3^Pentatricopeptide repeat domain^104-161^E:2.8e-05`PF01535.17^PPR^PPR repeat^119-148^E:0.00062`PF13041.3^PPR_2^PPR repeat family^150-199^E:2.4e-13`PF13812.3^PPR_3^Pentatricopeptide repeat domain^176-232^E:6e-09`PF12854.4^PPR_1^PPR repeat^181-213^E:2.1e-12`PF13041.3^PPR_2^PPR repeat family^185-234^E:1.9e-16`PF01535.17^PPR^PPR repeat^188-218^E:5.1e-07`PF12854.4^PPR_1^PPR repeat^216-2…	ENOG410Z7Z7^Pentatricopeptide repeat-containing protein	KEGG:ath:AT3G48810	.	.
c30277_g1_i3	-Inf	2.06465994582426e-10	4.14818521585939e-07	c30277_g1	MAA3_ARATH^MAA3_ARATH^Q:3068-714,H:1-787^68.05%ID^E:0^RecName: Full=Probable helicase MAGATAMA 3;^Eukaryota; Viridiplantae; Streptophyta; Embryophyta; Tracheophyta; Spermatophyta; Magnoliophyta; eudicotyledons; Gunneridae; Pentapetalae; rosids; malvids; Brassicales; Brassicaceae; Camelineae; Arabidopsis	Gene.72114::c30277_g1_i3::g.72114::m.72114	3068-579[-]	PF13086.3^AAA_11^AAA domain^257-447^E:2.9e-29`PF13245.3^AAA_19^Part of AAA domain^263-298^E:9.7e-06`PF13086.3^AAA_11^AAA domain^432-525^E:6.2e-34`PF13087.3^AAA_12^AAA domain^533-729^E:1.2e-62	COG1112^Helicase	KEGG:ath:AT4G15570`KO:K10706	GO:0005634^cellular_component^nucleus`GO:0005524^molecular_function^ATP binding`GO:0004386^molecular_function^helicase activity`GO:0009553^biological_process^embryo sac development`GO:0010183^biological_process^pollen tube guidance`GO:0009875^biological_process^pollen-pistil interaction	.
c28767_g1_i10	-Inf	9.04181896144077e-10	1.65442682446963e-06	c28767_g1	.	Gene.55822::c28767_g1_i10::g.55822::m.55822	1011-1[-]	.	.	.	.	.
c30330_g1_i1	-Inf	9.04181896144077e-10	1.65442682446963e-06	c30330_g1	.	.	.	.	.	.	.	.
c26084_g1_i5	-Inf	1.25623831508822e-09	2.25827570515491e-06	c26084_g1	KC1D_ARATH^KC1D_ARATH^Q:335-1384,H:1-349^70.538%ID^E:5.26e-166^RecName: Full=Casein kinase I isoform delta-like;^Eukaryota; Viridiplantae; Streptophyta; Embryophyta; Tracheophyta; Spermatophyta; Magnoliophyta; eudicotyledons; Gunneridae; Pentapetalae; rosids; malvids; Brassicales; Brassicaceae; Camelineae; Arabidopsis	Gene.33031::c26084_g1_i5::g.33031::m.33031	335-1636[+]	PF00069.22^Pkinase^Protein kinase domain^9-227^E:3.3e-29`PF07714.14^Pkinase_Tyr^Protein tyrosine kinase^10-268^E:1.8e-15	ENOG410XPGP^Casein Kinase	KEGG:ath:AT4G26100`KO:K02218	GO:0005737^cellular_component^cytoplasm`GO:0009506^cellular_component^plasmodesma`GO:0005524^molecular_function^ATP binding`GO:0004674^molecular_function^protein serine/threonine kinase activity`GO:0018105^biological_process^peptidyl-serine phosphorylation`GO:0016055^biological_process^Wnt signaling pathway	GO:0004672^molecular_function^protein kinase activity`GO:0005524^molecular_function^ATP binding`GO:0006468^biological_process^protein phosphorylation
c29363_g1_i2	-Inf	2.42667648568785e-09	3.94685448861097e-06	c29363_g1	ALF4_ARATH^ALF4_ARATH^Q:1176-1922,H:312-545^45.783%ID^E:2.99e-99^RecName: Full=Aberrant root formation protein 4;^Eukaryota; Viridiplantae; Streptophyta; Embryophyta; Tracheophyta; Spermatophyta; Magnoliophyta; eudicotyledons; Gunneridae; Pentapetalae; rosids; malvids; Brassicales; Brassicaceae; Camelineae; Arabidopsis`ALF4_ARATH^ALF4_ARATH^Q:174-761,H:54-245^48.98%ID^E:2.99e-99^RecName: Full=Abe…	Gene.62388::c29363_g1_i2::g.62388::m.62388	105-848[+]	PF08568.7^Kinetochor_Ybp2^Uncharacterised protein family, YAP/Alf4/glomulin^44-192^E:2.1e-13	ENOG4111RXQ^Uncharacterised protein family, YAP/Alf4/glomulin	KEGG:ath:AT5G11030	GO:0005634^cellular_component^nucleus`GO:0007275^biological_process^multicellular organism development	.
c29675_g1_i11	-Inf	4.69204324157283e-09	7.0702191586912e-06	c29675_g1	MURB_PARUW^MURB_PARUW^Q:1589-1311,H:205-294^48.387%ID^E:6.77e-24^RecName: Full=UDP-N-acetylenolpyruvoylglucosamine reductase {ECO:0000255|HAMAP-Rule:MF_00037};^Bacteria; Chlamydiae; Chlamydiales; Parachlamydiaceae; Candidatus Protochlamydia`MURB_PARUW^MURB_PARUW^Q:1870-1685,H:139-198^43.548%ID^E:6.77e-24^RecName: Full=UDP-N-acetylenolpyruvoylglucosamine reductase {ECO:0000255|HAMAP-Rule:MF_00037}…	Gene.65695::c29675_g1_i11::g.65695::m.65695	384-1085[+]	PF14108.3^DUF4281^Domain of unknown function (DUF4281)^96-223^E:7.9e-39	.	.	.	.
c27186_g1_i2	-Inf	7.69828728351332e-09	1.08056534903079e-05	c27186_g1	.	Gene.41344::c27186_g1_i2::g.41344::m.41344	276-2102[+]	.	.	.	.	.
c23445_g1_i11	-Inf	1.07121657322451e-08	1.44425364989504e-05	c23445_g1	SUSY_SOYBN^SUSY_SOYBN^Q:2846-432,H:1-805^88.571%ID^E:0^RecName: Full=Sucrose synthase;^Eukaryota; Viridiplantae; Streptophyta; Embryophyta; Tracheophyta; Spermatophyta; Magnoliophyta; eudicotyledons; Gunneridae; Pentapetalae; rosids; fabids; Fabales; Fabaceae; Papilionoideae; Phaseoleae; Glycine; Soja	Gene.18929::c23445_g1_i11::g.18929::m.18929	2846-429[-]	PF00862.16^Sucrose_synth^Sucrose synthase^8-553^E:4e-284`PF00534.17^Glycos_transf_1^Glycosyl transferases group 1^565-733^E:7.6e-31`PF13692.3^Glyco_trans_1_4^Glycosyl transferases group 1^571-722^E:2e-10	COG0438^Glycosyl transferase (Group 1	KEGG:gmx:547508`KO:K00695	GO:0016157^molecular_function^sucrose synthase activity`GO:0009877^biological_process^nodulation`GO:0005985^biological_process^sucrose metabolic process	GO:0016157^molecular_function^sucrose synthase activity`GO:0005985^biological_process^sucrose metabolic process
c26944_g1_i1	-Inf	1.26373906944868e-08	1.66053545568386e-05	c26944_g1	PMA10_ARATH^PMA10_ARATH^Q:4189-3209,H:625-947^78.287%ID^E:1.87e-154^RecName: Full=ATPase 10, plasma membrane-type;^Eukaryota; Viridiplantae; Streptophyta; Embryophyta; Tracheophyta; Spermatophyta; Magnoliophyta; eudicotyledons; Gunneridae; Pentapetalae; rosids; malvids; Brassicales; Brassicaceae; Camelineae; Arabidopsis	Gene.39401::c26944_g1_i1::g.39401::m.39401	809-2386[+]	PF01764.22^Lipase_3^Lipase (class 3)^220-419^E:8.5e-42	COG3675^Lipase class 3 family protein	.	GO:0005576^cellular_component^extracellular region`GO:0030248^molecular_function^cellulose binding`GO:0030600^molecular_function^feruloyl esterase activity`GO:0016998^biological_process^cell wall macromolecule catabolic process`GO:0030245^biological_process^cellulose catabolic process`GO:0006629^biological_process^lipid metabolic process`GO:0045490^biological_process^pectin catabolic process`GO:0…	GO:0006629^biological_process^lipid metabolic process
c29153_g1_i7	-Inf	1.49095056336009e-08	1.93381949905387e-05	c29153_g1	VPS8_HUMAN^VPS8_HUMAN^Q:2767-5178,H:470-1149^25.485%ID^E:6.52e-66^RecName: Full=Vacuolar protein sorting-associated protein 8 homolog;^Eukaryota; Metazoa; Chordata; Craniata; Vertebrata; Euteleostomi; Mammalia; Eutheria; Euarchontoglires; Primates; Haplorrhini; Catarrhini; Hominidae; Homo	Gene.60227::c29153_g1_i7::g.60227::m.60227	361-5181[+]	PF00400.29^WD40^WD domain, G-beta repeat^484-513^E:4.9e-05`PF12816.4^Vps8^Golgi CORVET complex core vacuolar protein 8^965-1149^E:3.5e-55`PF00637.17^Clathrin^Region in Clathrin and VPS^1470-1545^E:8.5e-08	ENOG410XRX6^vacuolar protein sorting 8 homolog (S. cerevisiae)	KEGG:hsa:23355	GO:0033263^cellular_component^CORVET complex`GO:0005769^cellular_component^early endosome`GO:0008270^molecular_function^zinc ion binding`GO:0034058^biological_process^endosomal vesicle fusion`GO:0015031^biological_process^protein transport	GO:0005515^molecular_function^protein binding`GO:0006886^biological_process^intracellular protein transport`GO:0016192^biological_process^vesicle-mediated transport
c26301_g3_i2	-Inf	2.07563998044109e-08	2.62571020044293e-05	c26301_g3	.	.	.	.	.	.	.	.
c30007_g1_i8	-Inf	2.89030490835583e-08	3.58599360991626e-05	c30007_g1	.	Gene.69109::c30007_g1_i8::g.69109::m.69109	281-640[+]	.	.	.	.	.
c28984_g1_i3	-Inf	4.75142619814957e-08	5.40955152021771e-05	c28984_g1	HSDD1_ARATH^HSDD1_ARATH^Q:2775-1813,H:7-326^66.667%ID^E:4.56e-145^RecName: Full=3beta-hydroxysteroid-dehydrogenase/decarboxylase isoform 1;^Eukaryota; Viridiplantae; Streptophyta; Embryophyta; Tracheophyta; Spermatophyta; Magnoliophyta; eudicotyledons; Gunneridae; Pentapetalae; rosids; malvids; Brassicales; Brassicaceae; Camelineae; Arabidopsis`HSDD1_ARATH^HSDD1_ARATH^Q:1493-987,H:282-438^51.744%…	Gene.58367::c28984_g1_i3::g.58367::m.58367	2784-1699[-]	PF01073.16^3Beta_HSD^3-beta hydroxysteroid dehydrogenase/isomerase family^10-279^E:5.1e-74`PF01370.18^Epimerase^NAD dependent epimerase/dehydratase family^10-237^E:2.3e-31`PF02719.12^Polysacc_synt_2^Polysaccharide biosynthesis protein^10-130^E:5.1e-07`PF16363.2^GDP_Man_Dehyd^GDP-mannose 4,6 dehydratase^11-271^E:3.9e-15`PF07993.9^NAD_binding_4^Male sterility protein^11-191^E:1.5e-12`PF13460.3^NAD_…	COG0451^Nad-dependent epimerase dehydratase	KEGG:ath:AT1G47290`KO:K07748	GO:0005789^cellular_component^endoplasmic reticulum membrane`GO:0016021^cellular_component^integral component of membrane`GO:0016020^cellular_component^membrane`GO:0003854^molecular_function^3-beta-hydroxy-delta5-steroid dehydrogenase activity`GO:0047012^molecular_function^sterol-4-alpha-carboxylate 3-dehydrogenase (decarboxylating) activity`GO:0016126^biological_process^sterol biosynthetic proce…	GO:0003854^molecular_function^3-beta-hydroxy-delta5-steroid dehydrogenase activity`GO:0016616^molecular_function^oxidoreductase activity, acting on the CH-OH group of donors, NAD or NADP as acceptor`GO:0006694^biological_process^steroid biosynthetic process`GO:0055114^biological_process^oxidation-reduction process`GO:0003824^molecular_function^catalytic activity`GO:0050662^molecular_function^coen…
c23779_g4_i5	-Inf	4.75142619814957e-08	5.40955152021771e-05	c23779_g4	FRS5_ARATH^FRS5_ARATH^Q:3164-1497,H:76-634^34.281%ID^E:1.52e-110^RecName: Full=Protein FAR1-RELATED SEQUENCE 5;^Eukaryota; Viridiplantae; Streptophyta; Embryophyta; Tracheophyta; Spermatophyta; Magnoliophyta; eudicotyledons; Gunneridae; Pentapetalae; rosids; malvids; Brassicales; Brassicaceae; Camelineae; Arabidopsis	Gene.20376::c23779_g4_i5::g.20376::m.20376	3392-741[-]	PF03101.12^FAR1^FAR1 DNA-binding domain^88-176^E:1e-24`PF10551.6^MULE^MULE transposase domain^298-392^E:3.1e-31`PF00872.15^Transposase_mut^Transposase, Mutator family^359-448^E:5.5e-05`PF04434.14^SWIM^SWIM zinc finger^580-614^E:0.00056	ENOG410ZJSX^protein FAR1-RELATED SEQUENCE 5-like	KEGG:ath:AT4G38180	GO:0005634^cellular_component^nucleus`GO:0008270^molecular_function^zinc ion binding`GO:0006355^biological_process^regulation of transcription, DNA-templated	GO:0003677^molecular_function^DNA binding`GO:0004803^molecular_function^transposase activity`GO:0006313^biological_process^transposition, DNA-mediated`GO:0008270^molecular_function^zinc ion binding
c30555_g2_i7	-Inf	4.75142619814957e-08	5.40955152021771e-05	c30555_g2	MED23_ARATH^MED23_ARATH^Q:5574-943,H:83-1605^72.317%ID^E:0^RecName: Full=Mediator of RNA polymerase II transcription subunit 23;^Eukaryota; Viridiplantae; Streptophyta; Embryophyta; Tracheophyta; Spermatophyta; Magnoliophyta; eudicotyledons; Gunneridae; Pentapetalae; rosids; malvids; Brassicales; Brassicaceae; Camelineae; Arabidopsis`MED23_ARATH^MED23_ARATH^Q:5873-5625,H:1-83^71.084%ID^E:1.03e-23…	Gene.75212::c30555_g2_i7::g.75212::m.75212	5388-2710[-]	PF11573.5^Med23^Mediator complex subunit 23^340-861^E:4.9e-17	ENOG410ZH5R^Mediator complex subunit 23	KEGG:ath:AT1G23230`KO:K15166	GO:0016592^cellular_component^mediator complex`GO:0006355^biological_process^regulation of transcription, DNA-templated`GO:0006351^biological_process^transcription, DNA-templated	.
c31142_g1_i7	-Inf	5.60835550426801e-08	6.28135771682725e-05	c31142_g1	AB26B_ARATH^AB26B_ARATH^Q:1636-560,H:340-698^66.295%ID^E:6.33e-158^RecName: Full=ABC transporter B family member 26, chloroplastic;^Eukaryota; Viridiplantae; Streptophyta; Embryophyta; Tracheophyta; Spermatophyta; Magnoliophyta; eudicotyledons; Gunneridae; Pentapetalae; rosids; malvids; Brassicales; Brassicaceae; Camelineae; Arabidopsis`AB26B_ARATH^AB26B_ARATH^Q:2448-1774,H:102-340^55.833%ID^E:7.…	Gene.81993::c31142_g1_i7::g.81993::m.81993	3337-5475[+]	PF04114.11^Gaa1^Gaa1-like, GPI transamidase component^150-704^E:8.6e-112	ENOG410XT16^glycosylphosphatidylinositol anchor attachment protein 1 homolog (yeast)	KEGG:mmu:14731`KO:K05289	GO:0042765^cellular_component^GPI-anchor transamidase complex`GO:0005887^cellular_component^integral component of plasma membrane`GO:0016020^cellular_component^membrane`GO:0034235^molecular_function^GPI anchor binding`GO:0003923^molecular_function^GPI-anchor transamidase activity`GO:0016255^biological_process^attachment of GPI anchor to protein`GO:0006506^biological_process^GPI anchor biosyntheti…	GO:0016021^cellular_component^integral component of membrane`GO:0042765^cellular_component^GPI-anchor transamidase complex
c24958_g1_i3	-Inf	7.81512240262405e-08	8.51898225646039e-05	c24958_g1	CSN7_ARATH^CSN7_ARATH^Q:342-1115,H:1-259^77.992%ID^E:1.56e-136^RecName: Full=COP9 signalosome complex subunit 7;^Eukaryota; Viridiplantae; Streptophyta; Embryophyta; Tracheophyta; Spermatophyta; Magnoliophyta; eudicotyledons; Gunneridae; Pentapetalae; rosids; malvids; Brassicales; Brassicaceae; Camelineae; Arabidopsis	Gene.26349::c24958_g1_i3::g.26349::m.26349	342-1118[+]	PF01399.24^PCI^PCI domain^79-154^E:7.7e-06	ENOG410XP7W^COP9 (constitutive photomorphogenic) homolog, subunit	KEGG:ath:AT1G02090`KO:K12180	GO:0008180^cellular_component^COP9 signalosome`GO:0005829^cellular_component^cytosol`GO:0010387^biological_process^COP9 signalosome assembly`GO:0010388^biological_process^cullin deneddylation`GO:0007275^biological_process^multicellular organism development`GO:0009585^biological_process^red, far-red light phototransduction	GO:0005515^molecular_function^protein binding
c30654_g1_i3	-Inf	9.22623439779713e-08	9.74613746190393e-05	c30654_g1	Y1523_ARATH^Y1523_ARATH^Q:4248-2719,H:40-552^68.208%ID^E:0^RecName: Full=C-type lectin receptor-like tyrosine-protein kinase At1g52310;^Eukaryota; Viridiplantae; Streptophyta; Embryophyta; Tracheophyta; Spermatophyta; Magnoliophyta; eudicotyledons; Gunneridae; Pentapetalae; rosids; malvids; Brassicales; Brassicaceae; Camelineae; Arabidopsis	Gene.76378::c30654_g1_i3::g.76378::m.76378	4380-2716[-]	PF00059.18^Lectin_C^Lectin C-type domain^71-186^E:3.3e-07`PF00069.22^Pkinase^Protein kinase domain^272-542^E:3.8e-37`PF07714.14^Pkinase_Tyr^Protein tyrosine kinase^275-544^E:6.5e-40	COG0515^Serine Threonine protein kinase	KEGG:ath:AT1G52310	GO:0016021^cellular_component^integral component of membrane`GO:0005886^cellular_component^plasma membrane`GO:0005524^molecular_function^ATP binding`GO:0030246^molecular_function^carbohydrate binding`GO:0004714^molecular_function^transmembrane receptor protein tyrosine kinase activity	GO:0004672^molecular_function^protein kinase activity`GO:0005524^molecular_function^ATP binding`GO:0006468^biological_process^protein phosphorylation
c29489_g1_i2	-Inf	1.08927841242912e-07	0.000113891838579554	c29489_g1	FRS5_ARATH^FRS5_ARATH^Q:445-2766,H:24-786^63.368%ID^E:0^RecName: Full=Protein FAR1-RELATED SEQUENCE 5;^Eukaryota; Viridiplantae; Streptophyta; Embryophyta; Tracheophyta; Spermatophyta; Magnoliophyta; eudicotyledons; Gunneridae; Pentapetalae; rosids; malvids; Brassicales; Brassicaceae; Camelineae; Arabidopsis	Gene.63715::c29489_g1_i2::g.63715::m.63715	442-2769[+]	PF03101.12^FAR1^FAR1 DNA-binding domain^67-162^E:7.1e-30`PF10551.6^MULE^MULE transposase domain^283-375^E:2.1e-31`PF04434.14^SWIM^SWIM zinc finger^550-596^E:8.2e-12	ENOG410ZJSX^protein FAR1-RELATED SEQUENCE 5-like	KEGG:ath:AT4G38180	GO:0005634^cellular_component^nucleus`GO:0008270^molecular_function^zinc ion binding`GO:0006355^biological_process^regulation of transcription, DNA-templated	GO:0008270^molecular_function^zinc ion binding
c31238_g1_i2	-Inf	1.28611267909133e-07	0.000130478041362151	c31238_g1	STI_ARATH^STI_ARATH^Q:59-2113,H:302-996^69.771%ID^E:0^RecName: Full=Protein STICHEL;^Eukaryota; Viridiplantae; Streptophyta; Embryophyta; Tracheophyta; Spermatophyta; Magnoliophyta; eudicotyledons; Gunneridae; Pentapetalae; rosids; malvids; Brassicales; Brassicaceae; Camelineae; Arabidopsis`STI_ARATH^STI_ARATH^Q:2330-2953,H:1009-1218^53.023%ID^E:1.33e-53^RecName: Full=Protein STICHEL;^Eukaryota; …	Gene.82965::c31238_g1_i2::g.82965::m.82965	2-2956[+]	PF13177.3^DNA_pol3_delta2^DNA polymerase III, delta subunit^180-340^E:3.2e-36`PF00004.26^AAA^ATPase family associated with various cellular activities (AAA)^202-336^E:7.8e-08`PF12169.5^DNA_pol3_gamma3^DNA polymerase III subunits gamma and tau domain III^393-474^E:3.3e-08	COG2812^dna polymerase iii subunits gamma and tau	KEGG:ath:AT2G02480	GO:0009360^cellular_component^DNA polymerase III complex`GO:0005634^cellular_component^nucleus`GO:0005886^cellular_component^plasma membrane`GO:0005524^molecular_function^ATP binding`GO:0003677^molecular_function^DNA binding`GO:0003887^molecular_function^DNA-directed DNA polymerase activity`GO:0006261^biological_process^DNA-dependent DNA replication`GO:0010091^biological_process^trichome branchin…	GO:0005524^molecular_function^ATP binding`GO:0003887^molecular_function^DNA-directed DNA polymerase activity
c29307_g1_i13	-Inf	1.28611267909133e-07	0.000130478041362151	c29307_g1	GSA_TOBAC^GSA_TOBAC^Q:3706-2645,H:125-478^86.441%ID^E:0^RecName: Full=Glutamate-1-semialdehyde 2,1-aminomutase, chloroplastic;^Eukaryota; Viridiplantae; Streptophyta; Embryophyta; Tracheophyta; Spermatophyta; Magnoliophyta; eudicotyledons; Gunneridae; Pentapetalae; asterids; lamiids; Solanales; Solanaceae; Nicotianoideae; Nicotianeae; Nicotiana	Gene.61857::c29307_g1_i13::g.61857::m.61857	1425-271[-]	PF00849.19^PseudoU_synth_2^RNA pseudouridylate synthase^125-278^E:1.7e-26	COG0564^pseudouridine synthase activity	.	GO:0005739^cellular_component^mitochondrion`GO:0009982^molecular_function^pseudouridine synthase activity`GO:0003723^molecular_function^RNA binding`GO:0031119^biological_process^tRNA pseudouridine synthesis	GO:0003723^molecular_function^RNA binding`GO:0009982^molecular_function^pseudouridine synthase activity`GO:0001522^biological_process^pseudouridine synthesis`GO:0009451^biological_process^RNA modification
c31342_g3_i3	-Inf	1.51860508120378e-07	0.000149620565625603	c31342_g3	NIK3_ARATH^NIK3_ARATH^Q:629-2323,H:1-520^70.547%ID^E:0^RecName: Full=Protein NSP-INTERACTING KINASE 3;^Eukaryota; Viridiplantae; Streptophyta; Embryophyta; Tracheophyta; Spermatophyta; Magnoliophyta; eudicotyledons; Gunneridae; Pentapetalae; rosids; malvids; Brassicales; Brassicaceae; Camelineae; Arabidopsis`NIK3_ARATH^NIK3_ARATH^Q:2716-3027,H:520-632^67.257%ID^E:1.83e-37^RecName: Full=Protein NS…	Gene.84248::c31342_g3_i3::g.84248::m.84248	1196-2368[+]	PF00069.22^Pkinase^Protein kinase domain^158-367^E:3.6e-42`PF07714.14^Pkinase_Tyr^Protein tyrosine kinase^160-358^E:1.8e-39	ENOG410ZS46^NSP-interacting kinase	KEGG:ath:AT1G60800	GO:0016021^cellular_component^integral component of membrane`GO:0005886^cellular_component^plasma membrane`GO:0005524^molecular_function^ATP binding`GO:0004674^molecular_function^protein serine/threonine kinase activity`GO:0006952^biological_process^defense response`GO:0016032^biological_process^viral process	GO:0004672^molecular_function^protein kinase activity`GO:0005524^molecular_function^ATP binding`GO:0006468^biological_process^protein phosphorylation
c25153_g2_i4	-Inf	3.48866587406998e-07	0.000305529604660217	c25153_g2	RNP1_ARATH^RNP1_ARATH^Q:643-1206,H:1-192^56.25%ID^E:8.85e-70^RecName: Full=Heterogeneous nuclear ribonucleoprotein 1;^Eukaryota; Viridiplantae; Streptophyta; Embryophyta; Tracheophyta; Spermatophyta; Magnoliophyta; eudicotyledons; Gunneridae; Pentapetalae; rosids; malvids; Brassicales; Brassicaceae; Camelineae; Arabidopsis	Gene.27451::c25153_g2_i4::g.27451::m.27451	643-2079[+]	PF00076.19^RRM_1^RNA recognition motif. (a.k.a. RRM, RBD, or RNP domain)^8-69^E:1.2e-16`PF16367.2^RRM_7^RNA recognition motif^106-172^E:3.3e-06`PF00076.19^RRM_1^RNA recognition motif. (a.k.a. RRM, RBD, or RNP domain)^108-165^E:1.2e-15	ENOG410YA8Z^Rna-binding protein	KEGG:ath:AT4G14300`KO:K14411	GO:0005737^cellular_component^cytoplasm`GO:0005681^cellular_component^spliceosomal complex`GO:0000166^molecular_function^nucleotide binding`GO:0003723^molecular_function^RNA binding`GO:0006397^biological_process^mRNA processing`GO:0051028^biological_process^mRNA transport`GO:0008380^biological_process^RNA splicing	GO:0003676^molecular_function^nucleic acid binding
c24946_g1_i4	-Inf	3.48866587406998e-07	0.000305529604660217	c24946_g1	.	.	.	.	.	.	.	.
c22719_g2_i4	-Inf	4.12077881639442e-07	0.000351866435167225	c22719_g2	WDR44_BOVIN^WDR44_BOVIN^Q:1587-2519,H:509-813^36.137%ID^E:1.82e-51^RecName: Full=WD repeat-containing protein 44;^Eukaryota; Metazoa; Chordata; Craniata; Vertebrata; Euteleostomi; Mammalia; Eutheria; Laurasiatheria; Cetartiodactyla; Ruminantia; Pecora; Bovidae; Bovinae; Bos	Gene.16097::c22719_g2_i4::g.16097::m.16097	738-3008[+]	PF00400.29^WD40^WD domain, G-beta repeat^279-313^E:1.3e-06`PF00400.29^WD40^WD domain, G-beta repeat^380-415^E:2.4e-06`PF00400.29^WD40^WD domain, G-beta repeat^421-457^E:9.2e-06	ENOG410XQPJ^WD repeatcontaining protein	KEGG:bta:286825	GO:0005829^cellular_component^cytosol`GO:0010008^cellular_component^endosome membrane`GO:0005794^cellular_component^Golgi apparatus`GO:0048471^cellular_component^perinuclear region of cytoplasm	GO:0005515^molecular_function^protein binding
c24744_g1_i3	-Inf	5.75037407903863e-07	0.000475175669663526	c24744_g1	TOM2B_ARATH^TOM2B_ARATH^Q:1277-1011,H:18-106^70.787%ID^E:1.96e-32^RecName: Full=Tobamovirus multiplication protein 2B;^Eukaryota; Viridiplantae; Streptophyta; Embryophyta; Tracheophyta; Spermatophyta; Magnoliophyta; eudicotyledons; Gunneridae; Pentapetalae; rosids; malvids; Brassicales; Brassicaceae; Camelineae; Arabidopsis	Gene.25137::c24744_g1_i3::g.25137::m.25137	1322-927[-]	PF16088.2^UPF0693^UPF0693 family^1-102^E:5.9e-06	ENOG410YYR9^NA	KEGG:ath:AT1G32370	.	.
c26710_g1_i2	-Inf	5.75037407903863e-07	0.000475175669663526	c26710_g1	ARFR_ARATH^ARFR_ARATH^Q:3-146,H:543-589^64.583%ID^E:5.88e-13^RecName: Full=Auxin response factor 18;^Eukaryota; Viridiplantae; Streptophyta; Embryophyta; Tracheophyta; Spermatophyta; Magnoliophyta; eudicotyledons; Gunneridae; Pentapetalae; rosids; malvids; Brassicales; Brassicaceae; Camelineae; Arabidopsis	.	.	.	ENOG410YECH^auxin response factor	KEGG:ath:AT3G61830	GO:0005634^cellular_component^nucleus`GO:0003677^molecular_function^DNA binding`GO:0003700^molecular_function^transcription factor activity, sequence-specific DNA binding`GO:0009734^biological_process^auxin-activated signaling pathway`GO:0006351^biological_process^transcription, DNA-templated	.
c31484_g2_i3	-Inf	5.75037407903863e-07	0.000475175669663526	c31484_g2	.	Gene.85933::c31484_g2_i3::g.85933::m.85933	3-2504[+]	PF13589.3^HATPase_c_3^Histidine kinase-, DNA gyrase B-, and HSP90-like ATPase^149-273^E:2.5e-11	.	.	.	.
c26314_g1_i4	-Inf	8.02629996911114e-07	0.000623047615632532	c26314_g1	Y1491_ARATH^Y1491_ARATH^Q:1097-1951,H:199-475^36.111%ID^E:3.63e-67^RecName: Full=Uncharacterized protein At1g04910;^Eukaryota; Viridiplantae; Streptophyta; Embryophyta; Tracheophyta; Spermatophyta; Magnoliophyta; eudicotyledons; Gunneridae; Pentapetalae; rosids; malvids; Brassicales; Brassicaceae; Camelineae; Arabidopsis`Y1491_ARATH^Y1491_ARATH^Q:700-1065,H:73-205^42.105%ID^E:3.63e-67^RecName: Fu…	Gene.34606::c26314_g1_i4::g.34606::m.34606	1295-2005[+]	PF10250.6^O-FucT^GDP-fucose protein O-fucosyltransferase^1-148^E:1.4e-30	ENOG410Z25U^DUF246 domain-containing protein	KEGG:ath:AT1G04910	GO:0005768^cellular_component^endosome`GO:0005794^cellular_component^Golgi apparatus`GO:0000139^cellular_component^Golgi membrane`GO:0016021^cellular_component^integral component of membrane`GO:0005802^cellular_component^trans-Golgi network`GO:0016757^molecular_function^transferase activity, transferring glycosyl groups	.
c28452_g2_i3	-Inf	8.02629996911114e-07	0.000623047615632532	c28452_g2	FRS5_ARATH^FRS5_ARATH^Q:4269-3442,H:111-390^23.693%ID^E:3.89e-13^RecName: Full=Protein FAR1-RELATED SEQUENCE 5;^Eukaryota; Viridiplantae; Streptophyta; Embryophyta; Tracheophyta; Spermatophyta; Magnoliophyta; eudicotyledons; Gunneridae; Pentapetalae; rosids; malvids; Brassicales; Brassicaceae; Camelineae; Arabidopsis	Gene.52477::c28452_g2_i3::g.52477::m.52477	4485-1840[-]	PF03101.12^FAR1^FAR1 DNA-binding domain^60-141^E:0.00013`PF10551.6^MULE^MULE transposase domain^256-350^E:3.3e-27	ENOG410ZJSX^protein FAR1-RELATED SEQUENCE 5-like	KEGG:ath:AT4G38180	GO:0005634^cellular_component^nucleus`GO:0008270^molecular_function^zinc ion binding`GO:0006355^biological_process^regulation of transcription, DNA-templated	.
c30245_g1_i5	-Inf	1.12056497461291e-06	0.000850517116212494	c30245_g1	.	Gene.71709::c30245_g1_i5::g.71709::m.71709	1996-1283[-]	PF01925.16^TauE^Sulfite exporter TauE/SafE^54-173^E:3e-12	.	.	.	GO:0016021^cellular_component^integral component of membrane
c30355_g2_i9	-Inf	1.12056497461291e-06	0.000850517116212494	c30355_g2	NRPC1_ARATH^NRPC1_ARATH^Q:214-2322,H:525-1202^69.318%ID^E:0^RecName: Full=DNA-directed RNA polymerase III subunit 1 {ECO:0000305};^Eukaryota; Viridiplantae; Streptophyta; Embryophyta; Tracheophyta; Spermatophyta; Magnoliophyta; eudicotyledons; Gunneridae; Pentapetalae; rosids; malvids; Brassicales; Brassicaceae; Camelineae; Arabidopsis	Gene.72964::c30355_g2_i9::g.72964::m.72964	340-2397[+]	PF04983.15^RNA_pol_Rpb1_3^RNA polymerase Rpb1, domain 3^13-145^E:7e-22`PF05000.14^RNA_pol_Rpb1_4^RNA polymerase Rpb1, domain 4^171-276^E:4.3e-29`PF04998.14^RNA_pol_Rpb1_5^RNA polymerase Rpb1, domain 5^283-673^E:3.2e-66	COG0086^DNA-dependent RNA polymerase catalyzes the transcription of DNA into RNA using the four ribonucleoside triphosphates as substrates (By similarity)	.	GO:0005634^cellular_component^nucleus`GO:0003677^molecular_function^DNA binding`GO:0003899^molecular_function^DNA-directed RNA polymerase activity`GO:0046872^molecular_function^metal ion binding`GO:0006351^biological_process^transcription, DNA-templated	GO:0003677^molecular_function^DNA binding`GO:0003899^molecular_function^DNA-directed RNA polymerase activity`GO:0006351^biological_process^transcription, DNA-templated
c28570_g1_i4	-Inf	1.32414703818546e-06	0.000969143217247937	c28570_g1	DYL1_HELCR^DYL1_HELCR^Q:488-757,H:1-88^46.667%ID^E:8.64e-20^RecName: Full=Dynein light chain LC6, flagellar outer arm;^Eukaryota; Metazoa; Echinodermata; Eleutherozoa; Echinozoa; Echinoidea; Euechinoidea; Echinacea; Echinoida; Echinometridae; Heliocidaris	Gene.53731::c28570_g1_i4::g.53731::m.53731	4577-2007[-]	PF14383.3^VARLMGL^DUF761-associated sequence motif^259-279^E:3.3e-06`PF14309.3^DUF4378^Domain of unknown function (DUF4378)^733-853^E:1.2e-05	.	.	.	.
c31469_g1_i7	-Inf	1.56480748861778e-06	0.00108337543330209	c31469_g1	LORF2_HUMAN^LORF2_HUMAN^Q:2514-1186,H:381-823^24.667%ID^E:6.65e-30^RecName: Full=LINE-1 retrotransposable element ORF2 protein;^Eukaryota; Metazoa; Chordata; Craniata; Vertebrata; Euteleostomi; Mammalia; Eutheria; Euarchontoglires; Primates; Haplorrhini; Catarrhini; Hominidae; Homo	Gene.85753::c31469_g1_i7::g.85753::m.85753	4029-3415[-]	.	.	.	.	.
c29989_g2_i6	-Inf	1.56480748861778e-06	0.00108337543330209	c29989_g2	RH24_ARATH^RH24_ARATH^Q:2968-797,H:1-720^77.26%ID^E:0^RecName: Full=DEAD-box ATP-dependent RNA helicase 24;^Eukaryota; Viridiplantae; Streptophyta; Embryophyta; Tracheophyta; Spermatophyta; Magnoliophyta; eudicotyledons; Gunneridae; Pentapetalae; rosids; malvids; Brassicales; Brassicaceae; Camelineae; Arabidopsis	Gene.68932::c29989_g2_i6::g.68932::m.68932	2968-656[-]	PF00270.26^DEAD^DEAD/DEAH box helicase^250-421^E:2e-49`PF00271.28^Helicase_C^Helicase conserved C-terminal domain^469-566^E:1.9e-25	ENOG410XSQV^ATP-dependent RNA helicase	KEGG:ath:AT2G47330`KO:K12835	GO:0005524^molecular_function^ATP binding`GO:0004386^molecular_function^helicase activity`GO:0003723^molecular_function^RNA binding	GO:0003676^molecular_function^nucleic acid binding`GO:0005524^molecular_function^ATP binding
c27997_g1_i1	-Inf	2.18568122701662e-06	0.00146377786017964	c27997_g1	PAH2_ARATH^PAH2_ARATH^Q:2906-3859,H:638-929^70.126%ID^E:2.34e-148^RecName: Full=Phosphatidate phosphatase PAH2;^Eukaryota; Viridiplantae; Streptophyta; Embryophyta; Tracheophyta; Spermatophyta; Magnoliophyta; eudicotyledons; Gunneridae; Pentapetalae; rosids; malvids; Brassicales; Brassicaceae; Camelineae; Arabidopsis`PAH2_ARATH^PAH2_ARATH^Q:728-1375,H:1-201^50.885%ID^E:2.3e-49^RecName: Full=Phosp…	Gene.48346::c27997_g1_i1::g.48346::m.48346	728-3868[+]	PF04571.11^Lipin_N^lipin, N-terminal conserved region^1-95^E:9.9e-28`PF08235.10^LNS2^LNS2 (Lipin/Ned1/Smp2)^784-1021^E:4.7e-89	COG5083^phosphatidylinositol transfer protein	.	GO:0048046^cellular_component^apoplast`GO:0005829^cellular_component^cytosol`GO:0016020^cellular_component^membrane`GO:0008195^molecular_function^phosphatidate phosphatase activity`GO:0019375^biological_process^galactolipid biosynthetic process`GO:0008654^biological_process^phospholipid biosynthetic process	.
c27516_g2_i6	-Inf	2.58337809471027e-06	0.00169684884520886	c27516_g2	NT5D_DICDI^NT5D_DICDI^Q:1907-531,H:137-590^41.991%ID^E:1.17e-118^RecName: Full=5'-nucleotidase domain-containing protein DDB_G0275467;^Eukaryota; Amoebozoa; Mycetozoa; Dictyosteliida; Dictyostelium	Gene.44014::c27516_g2_i6::g.44014::m.44014	2159-504[-]	PF05761.11^5_nucleotid^5' nucleotidase family^96-541^E:1.8e-144	ENOG410XT8W^5-nucleotidase domain containing	KEGG:ddi:DDB_G0275467	GO:0008253^molecular_function^5'-nucleotidase activity`GO:0046872^molecular_function^metal ion binding`GO:0016311^biological_process^dephosphorylation	.
c27404_g1_i3	-Inf	3.05361689074981e-06	0.00191958225967834	c27404_g1	COIL_ARATH^COIL_ARATH^Q:1488-202,H:1-417^39.955%ID^E:1.33e-44^RecName: Full=Coilin {ECO:0000303|PubMed:16624863};^Eukaryota; Viridiplantae; Streptophyta; Embryophyta; Tracheophyta; Spermatophyta; Magnoliophyta; eudicotyledons; Gunneridae; Pentapetalae; rosids; malvids; Brassicales; Brassicaceae; Camelineae; Arabidopsis	Gene.43018::c27404_g1_i3::g.43018::m.43018	1488-142[-]	PF15862.2^Coilin_N^Coilin N-terminus^6-173^E:4.9e-22	ENOG410ZKQA^NA	KEGG:ath:AT1G13030`KO:K13150	GO:0015030^cellular_component^Cajal body`GO:0030619^molecular_function^U1 snRNA binding`GO:0030620^molecular_function^U2 snRNA binding	.
c26655_g2_i15	-Inf	3.05361689074981e-06	0.00191958225967834	c26655_g2	AGAL_CYATE^AGAL_CYATE^Q:3156-2305,H:107-318^25.263%ID^E:1.95e-14^RecName: Full=Alpha-galactosidase;^Eukaryota; Viridiplantae; Streptophyta; Embryophyta; Tracheophyta; Spermatophyta; Magnoliophyta; eudicotyledons; Gunneridae; Pentapetalae; rosids; fabids; Fabales; Fabaceae; Papilionoideae; Indigofereae; Cyamopsis	Gene.37119::c26655_g2_i15::g.37119::m.37119	3234-2035[-]	PF16499.2^Melibiase_2^Alpha galactosidase A^135-310^E:3.4e-14	.	.	GO:0052692^molecular_function^raffinose alpha-galactosidase activity`GO:0005975^biological_process^carbohydrate metabolic process	GO:0004553^molecular_function^hydrolase activity, hydrolyzing O-glycosyl compounds`GO:0005975^biological_process^carbohydrate metabolic process
c25621_g4_i3	-Inf	3.05361689074981e-06	0.00191958225967834	c25621_g4	RNG1A_ARATH^RNG1A_ARATH^Q:973-1827,H:223-521^50.831%ID^E:5.09e-68^RecName: Full=Putative E3 ubiquitin-protein ligase RING1a;^Eukaryota; Viridiplantae; Streptophyta; Embryophyta; Tracheophyta; Spermatophyta; Magnoliophyta; eudicotyledons; Gunneridae; Pentapetalae; rosids; malvids; Brassicales; Brassicaceae; Camelineae; Arabidopsis`RNG1A_ARATH^RNG1A_ARATH^Q:101-445,H:111-225^79.13%ID^E:5.86e-47^Rec…	Gene.30202::c25621_g4_i3::g.30202::m.30202	1063-1833[+]	.	.	.	GO:0005634^cellular_component^nucleus`GO:0035102^cellular_component^PRC1 complex`GO:0016874^molecular_function^ligase activity`GO:0008270^molecular_function^zinc ion binding`GO:0001709^biological_process^cell fate determination`GO:0016568^biological_process^chromatin modification`GO:0010076^biological_process^maintenance of floral meristem identity`GO:0010077^biological_process^maintenance of inf…	.
c26877_g1_i3	-Inf	4.26720834434125e-06	0.00248433960347313	c26877_g1	FRS5_ARATH^FRS5_ARATH^Q:915-2597,H:69-634^35.626%ID^E:1.93e-115^RecName: Full=Protein FAR1-RELATED SEQUENCE 5;^Eukaryota; Viridiplantae; Streptophyta; Embryophyta; Tracheophyta; Spermatophyta; Magnoliophyta; eudicotyledons; Gunneridae; Pentapetalae; rosids; malvids; Brassicales; Brassicaceae; Camelineae; Arabidopsis`FRS5_ARATH^FRS5_ARATH^Q:450-917,H:45-208^29.878%ID^E:4.14e-13^RecName: Full=Prote…	Gene.38909::c26877_g1_i3::g.38909::m.38909	153-2603[+]	PF03101.12^FAR1^FAR1 DNA-binding domain^139-225^E:5e-22`PF03101.12^FAR1^FAR1 DNA-binding domain^273-361^E:1.1e-24`PF10551.6^MULE^MULE transposase domain^481-574^E:3.4e-27`PF04434.14^SWIM^SWIM zinc finger^761-797^E:1.2e-06	ENOG410ZJSX^protein FAR1-RELATED SEQUENCE 5-like	KEGG:ath:AT4G38180	GO:0005634^cellular_component^nucleus`GO:0008270^molecular_function^zinc ion binding`GO:0006355^biological_process^regulation of transcription, DNA-templated	GO:0008270^molecular_function^zinc ion binding
c28769_g1_i12	-Inf	4.26720834434125e-06	0.00248433960347313	c28769_g1	PIGO_HUMAN^PIGO_HUMAN^Q:3535-3014,H:138-302^52.874%ID^E:4.17e-46^RecName: Full=GPI ethanolamine phosphate transferase 3;^Eukaryota; Metazoa; Chordata; Craniata; Vertebrata; Euteleostomi; Mammalia; Eutheria; Euarchontoglires; Primates; Haplorrhini; Catarrhini; Hominidae; Homo	Gene.55855::c28769_g1_i12::g.55855::m.55855	2246-543[-]	.	COG1524^type i phosphodiesterase nucleotide pyrophosphatase	.	GO:0005789^cellular_component^endoplasmic reticulum membrane`GO:0016021^cellular_component^integral component of membrane`GO:0016020^cellular_component^membrane`GO:0051377^molecular_function^mannose-ethanolamine phosphotransferase activity`GO:0016780^molecular_function^phosphotransferase activity, for other substituted phosphate groups`GO:0006506^biological_process^GPI anchor biosynthetic process	.
c30532_g1_i2	-Inf	5.96450526789106e-06	0.00335801646582266	c30532_g1	PPR57_ARATH^PPR57_ARATH^Q:461-2845,H:4-790^64.868%ID^E:0^RecName: Full=Pentatricopeptide repeat-containing protein At1g25360;^Eukaryota; Viridiplantae; Streptophyta; Embryophyta; Tracheophyta; Spermatophyta; Magnoliophyta; eudicotyledons; Gunneridae; Pentapetalae; rosids; malvids; Brassicales; Brassicaceae; Camelineae; Arabidopsis	Gene.74965::c30532_g1_i2::g.74965::m.74965	455-2848[+]	PF01535.17^PPR^PPR repeat^52-76^E:0.019`PF01535.17^PPR^PPR repeat^83-104^E:0.51`PF13041.3^PPR_2^PPR repeat family^111-158^E:5.3e-11`PF01535.17^PPR^PPR repeat^113-142^E:6.7e-05`PF01535.17^PPR^PPR repeat^225-252^E:0.00053`PF01535.17^PPR^PPR repeat^255-285^E:1e-07`PF13041.3^PPR_2^PPR repeat family^255-300^E:1.6e-12`PF13812.3^PPR_3^Pentatricopeptide repeat domain^276-323^E:0.0072`PF01535.17^PPR^PPR r…	ENOG410Z7Z7^Pentatricopeptide repeat-containing protein	KEGG:ath:AT1G25360	.	GO:0008270^molecular_function^zinc ion binding
c29105_g1_i1	-Inf	7.0522482641915e-06	0.00382336333671241	c29105_g1	MYO15_ARATH^MYO15_ARATH^Q:3682-992,H:515-1400^74.053%ID^E:0^RecName: Full=Myosin-15;^Eukaryota; Viridiplantae; Streptophyta; Embryophyta; Tracheophyta; Spermatophyta; Magnoliophyta; eudicotyledons; Gunneridae; Pentapetalae; rosids; malvids; Brassicales; Brassicaceae; Camelineae; Arabidopsis`MYO15_ARATH^MYO15_ARATH^Q:5235-3712,H:8-514^80.709%ID^E:0^RecName: Full=Myosin-15;^Eukaryota; Viridiplantae…	Gene.59619::c29105_g1_i1::g.59619::m.59619	3679-989[-]	PF00063.18^Myosin_head^Myosin head (motor domain)^1-210^E:7.8e-55`PF00612.24^IQ^IQ calmodulin-binding motif^227-245^E:0.027`PF00612.24^IQ^IQ calmodulin-binding motif^251-268^E:0.0083`PF00612.24^IQ^IQ calmodulin-binding motif^274-293^E:0.014`PF00612.24^IQ^IQ calmodulin-binding motif^299-316^E:0.0057`PF00612.24^IQ^IQ calmodulin-binding motif^322-342^E:0.005`PF01843.16^DIL^DIL domain^828-895^E:2.8e-…	COG5022^myosin heavy chain	.	GO:0005737^cellular_component^cytoplasm`GO:0016459^cellular_component^myosin complex`GO:0005524^molecular_function^ATP binding`GO:0003774^molecular_function^motor activity`GO:0030048^biological_process^actin filament-based movement	GO:0003774^molecular_function^motor activity`GO:0005524^molecular_function^ATP binding`GO:0016459^cellular_component^myosin complex`GO:0005515^molecular_function^protein binding
c28101_g2_i2	-Inf	7.0522482641915e-06	0.00382336333671241	c28101_g2	RGLG1_ARATH^RGLG1_ARATH^Q:1388-717,H:289-489^64.732%ID^E:1.73e-88^RecName: Full=E3 ubiquitin-protein ligase RGLG1;^Eukaryota; Viridiplantae; Streptophyta; Embryophyta; Tracheophyta; Spermatophyta; Magnoliophyta; eudicotyledons; Gunneridae; Pentapetalae; rosids; malvids; Brassicales; Brassicaceae; Camelineae; Arabidopsis	Gene.49339::c28101_g2_i2::g.49339::m.49339	1256-714[-]	PF07002.13^Copine^Copine^2-61^E:3.3e-11`PF13920.3^zf-C3HC4_3^Zinc finger, C3HC4 type (RING finger)^134-175^E:4.1e-09	ENOG410XPC8^copine family	KEGG:ath:AT5G14420`KO:K16280	GO:0005634^cellular_component^nucleus`GO:0005886^cellular_component^plasma membrane`GO:0016874^molecular_function^ligase activity`GO:0004842^molecular_function^ubiquitin-protein transferase activity`GO:0008270^molecular_function^zinc ion binding`GO:0009850^biological_process^auxin metabolic process`GO:0009690^biological_process^cytokinin metabolic process`GO:0080148^biological_process^negative re…	.
c28718_g5_i4	-Inf	9.8607385183318e-06	0.00510298198494639	c28718_g5	UVR8_ARATH^UVR8_ARATH^Q:2018-3019,H:58-377^34.821%ID^E:2.07e-50^RecName: Full=Ultraviolet-B receptor UVR8;^Eukaryota; Viridiplantae; Streptophyta; Embryophyta; Tracheophyta; Spermatophyta; Magnoliophyta; eudicotyledons; Gunneridae; Pentapetalae; rosids; malvids; Brassicales; Brassicaceae; Camelineae; Arabidopsis`UVR8_ARATH^UVR8_ARATH^Q:2060-3148,H:20-372^33.333%ID^E:4.85e-48^RecName: Full=Ultravi…	Gene.55223::c28718_g5_i4::g.55223::m.55223	1820-4438[+]	PF00415.15^RCC1^Regulator of chromosome condensation (RCC1) repeat^95-143^E:6e-11`PF13540.3^RCC1_2^Regulator of chromosome condensation (RCC1) repeat^133-157^E:5.4e-08`PF00415.15^RCC1^Regulator of chromosome condensation (RCC1) repeat^146-198^E:4.1e-10`PF00415.15^RCC1^Regulator of chromosome condensation (RCC1) repeat^201-250^E:5.5e-12`PF00415.15^RCC1^Regulator of chromosome condensation (RCC1) r…	COG5184^regulator of chromosome condensation	KEGG:ath:AT5G63860	GO:0000785^cellular_component^chromatin`GO:0005829^cellular_component^cytosol`GO:0005634^cellular_component^nucleus`GO:0003682^molecular_function^chromatin binding`GO:0005085^molecular_function^guanyl-nucleotide exchange factor activity`GO:0009881^molecular_function^photoreceptor activity`GO:0042803^molecular_function^protein homodimerization activity`GO:0009649^biological_process^entrainment of …	GO:0046872^molecular_function^metal ion binding
c28414_g2_i6	-Inf	1.37908687662077e-05	0.00673487642798086	c28414_g2	DCP1_ARATH^DCP1_ARATH^Q:3152-2883,H:1-97^78.351%ID^E:4.83e-40^RecName: Full=mRNA-decapping enzyme-like protein;^Eukaryota; Viridiplantae; Streptophyta; Embryophyta; Tracheophyta; Spermatophyta; Magnoliophyta; eudicotyledons; Gunneridae; Pentapetalae; rosids; malvids; Brassicales; Brassicaceae; Camelineae; Arabidopsis`DCP1_ARATH^DCP1_ARATH^Q:1987-1802,H:83-144^87.097%ID^E:6.52e-26^RecName: Full=mR…	Gene.52123::c28414_g2_i6::g.52123::m.52123	1361-642[-]	.	ENOG410XRY6^DCP1 decapping enzyme homolog b (S. cerevisiae)	KEGG:ath:AT1G08370`KO:K12611	GO:0005737^cellular_component^cytoplasm`GO:0000932^cellular_component^cytoplasmic mRNA processing body`GO:0008047^molecular_function^enzyme activator activity`GO:0030234^molecular_function^enzyme regulator activity`GO:0016787^molecular_function^hydrolase activity`GO:0003729^molecular_function^mRNA binding`GO:0000290^biological_process^deadenylation-dependent decapping of nuclear-transcribed mRNA`…	.
c28403_g1_i11	-Inf	1.37908687662077e-05	0.00673487642798086	c28403_g1	KEA6_ARATH^KEA6_ARATH^Q:317-946,H:68-279^86.321%ID^E:7.72e-108^RecName: Full=K(+) efflux antiporter 6 {ECO:0000303|PubMed:11500563};^Eukaryota; Viridiplantae; Streptophyta; Embryophyta; Tracheophyta; Spermatophyta; Magnoliophyta; eudicotyledons; Gunneridae; Pentapetalae; rosids; malvids; Brassicales; Brassicaceae; Camelineae; Arabidopsis`KEA6_ARATH^KEA6_ARATH^Q:1901-2353,H:373-523^85.43%ID^E:1.51…	Gene.51977::c28403_g1_i11::g.51977::m.51977	188-949[+]	PF00999.18^Na_H_Exchanger^Sodium/hydrogen exchanger family^156-252^E:1.8e-18	COG0475^Sodium hydrogen exchanger	KEGG:ath:AT5G11800	GO:0016021^cellular_component^integral component of membrane`GO:0016020^cellular_component^membrane`GO:0015299^molecular_function^solute:proton antiporter activity`GO:0006813^biological_process^potassium ion transport	GO:0015299^molecular_function^solute:proton antiporter activity`GO:0006812^biological_process^cation transport`GO:0055085^biological_process^transmembrane transport`GO:0016021^cellular_component^integral component of membrane
c25444_g1_i1	-Inf	1.63106096028039e-05	0.00777340894679489	c25444_g1	RS5_CICAR^RS5_CICAR^Q:246-779,H:2-179^89.888%ID^E:1.07e-115^RecName: Full=40S ribosomal protein S5;^Eukaryota; Viridiplantae; Streptophyta; Embryophyta; Tracheophyta; Spermatophyta; Magnoliophyta; eudicotyledons; Gunneridae; Pentapetalae; rosids; fabids; Fabales; Fabaceae; Papilionoideae; Cicereae; Cicer	Gene.29203::c25444_g1_i1::g.29203::m.29203	207-785[+]	PF00177.18^Ribosomal_S7^Ribosomal protein S7p/S5e^64-190^E:7.4e-30	.	.	GO:0015935^cellular_component^small ribosomal subunit`GO:0003723^molecular_function^RNA binding`GO:0003735^molecular_function^structural constituent of ribosome`GO:0006412^biological_process^translation	.
c31157_g1_i8	-Inf	1.92918401658011e-05	0.00882481113584363	c31157_g1	Y1439_ARATH^Y1439_ARATH^Q:4474-2063,H:10-802^45.387%ID^E:0^RecName: Full=BTB/POZ domain-containing protein At1g04390;^Eukaryota; Viridiplantae; Streptophyta; Embryophyta; Tracheophyta; Spermatophyta; Magnoliophyta; eudicotyledons; Gunneridae; Pentapetalae; rosids; malvids; Brassicales; Brassicaceae; Camelineae; Arabidopsis`Y1439_ARATH^Y1439_ARATH^Q:1092-667,H:859-1000^48.592%ID^E:9.3e-35^RecName:…	Gene.82177::c31157_g1_i8::g.82177::m.82177	4525-1985[-]	.	ENOG410YBFM^BTB POZ domain-containing protein	KEGG:ath:AT1G04390	GO:0016567^biological_process^protein ubiquitination	.
c24769_g1_i1	-Inf	1.92918401658011e-05	0.00882481113584363	c24769_g1	.	Gene.25281::c24769_g1_i1::g.25281::m.25281	704-387[-]	.	.	.	.	.
c28758_g1_i2	-Inf	1.92918401658011e-05	0.00882481113584363	c28758_g1	GT14C_ARATH^GT14C_ARATH^Q:2369-1938,H:53-194^77.083%ID^E:2.49e-77^RecName: Full=Beta-glucuronosyltransferase GlcAT14C {ECO:0000305};^Eukaryota; Viridiplantae; Streptophyta; Embryophyta; Tracheophyta; Spermatophyta; Magnoliophyta; eudicotyledons; Gunneridae; Pentapetalae; rosids; malvids; Brassicales; Brassicaceae; Camelineae; Arabidopsis`GT14C_ARATH^GT14C_ARATH^Q:1851-1693,H:196-249^70.37%ID^E:2.…	Gene.55706::c28758_g1_i2::g.55706::m.55706	2540-1935[-]	PF02485.18^Branch^Core-2/I-Branching enzyme^64-201^E:8.1e-34	ENOG410XQ7M^Glucosaminyl (N-acetyl) transferase	KEGG:ath:AT2G37585	GO:0000139^cellular_component^Golgi membrane`GO:0016021^cellular_component^integral component of membrane`GO:0008375^molecular_function^acetylglucosaminyltransferase activity`GO:0015020^molecular_function^glucuronosyltransferase activity	GO:0008375^molecular_function^acetylglucosaminyltransferase activity`GO:0016020^cellular_component^membrane
c27816_g1_i3	-Inf	1.92918401658011e-05	0.00882481113584363	c27816_g1	RFS6_ARATH^RFS6_ARATH^Q:415-2070,H:1-549^79.783%ID^E:0^RecName: Full=Probable galactinol--sucrose galactosyltransferase 6;^Eukaryota; Viridiplantae; Streptophyta; Embryophyta; Tracheophyta; Spermatophyta; Magnoliophyta; eudicotyledons; Gunneridae; Pentapetalae; rosids; malvids; Brassicales; Brassicaceae; Camelineae; Arabidopsis`RFS6_ARATH^RFS6_ARATH^Q:2178-2858,H:548-749^58.772%ID^E:7.3e-82^RecNa…	Gene.46698::c27816_g1_i3::g.46698::m.46698	415-2076[+]	PF05691.9^Raffinose_syn^Raffinose synthase or seed imbibition protein Sip1^7-552^E:2.4e-259	ENOG410YBU9^raffinose synthase	KEGG:ath:AT5G20250`KO:K06617	GO:0047274^molecular_function^galactinol-sucrose galactosyltransferase activity`GO:0005975^biological_process^carbohydrate metabolic process	.
c24887_g1_i11	-Inf	2.2819280110095e-05	0.0101660885033087	c24887_g1	APT5_ARATH^APT5_ARATH^Q:1647-1204,H:1-148^83.784%ID^E:5.53e-79^RecName: Full=Adenine phosphoribosyltransferase 5;^Eukaryota; Viridiplantae; Streptophyta; Embryophyta; Tracheophyta; Spermatophyta; Magnoliophyta; eudicotyledons; Gunneridae; Pentapetalae; rosids; malvids; Brassicales; Brassicaceae; Camelineae; Arabidopsis	Gene.25976::c24887_g1_i11::g.25976::m.25976	1647-1156[-]	PF00156.24^Pribosyltran^Phosphoribosyl transferase domain^45-148^E:2.6e-12	COG0503^Catalyzes a salvage reaction resulting in the formation of AMP, that is energically less costly than de novo synthesis (By similarity)	KEGG:ath:AT5G11160`KO:K00759	GO:0005737^cellular_component^cytoplasm`GO:0003999^molecular_function^adenine phosphoribosyltransferase activity`GO:0006168^biological_process^adenine salvage`GO:0044209^biological_process^AMP salvage	GO:0009116^biological_process^nucleoside metabolic process
c22279_g1_i1	-Inf	2.2819280110095e-05	0.0101660885033087	c22279_g1	LWD1_ARATH^LWD1_ARATH^Q:1333-341,H:16-346^52.252%ID^E:3.28e-125^RecName: Full=WD repeat-containing protein LWD1;^Eukaryota; Viridiplantae; Streptophyta; Embryophyta; Tracheophyta; Spermatophyta; Magnoliophyta; eudicotyledons; Gunneridae; Pentapetalae; rosids; malvids; Brassicales; Brassicaceae; Camelineae; Arabidopsis	Gene.14512::c22279_g1_i1::g.14512::m.14512	1348-338[-]	PF00400.29^WD40^WD domain, G-beta repeat^124-152^E:0.23`PF00400.29^WD40^WD domain, G-beta repeat^160-193^E:0.077	ENOG410XQ78^ddb1 and cul4 associated factor 7	KEGG:ath:AT1G12910`KO:K11805	GO:0005634^cellular_component^nucleus`GO:0044212^molecular_function^transcription regulatory region DNA binding`GO:0009718^biological_process^anthocyanin-containing compound biosynthetic process`GO:0043153^biological_process^entrainment of circadian clock by photoperiod`GO:0048573^biological_process^photoperiodism, flowering`GO:0048511^biological_process^rhythmic process	GO:0005515^molecular_function^protein binding
c30790_g2_i9	-Inf	2.2819280110095e-05	0.0101660885033087	c30790_g2	U74E2_ARATH^U74E2_ARATH^Q:239-1162,H:3-314^50.479%ID^E:3.59e-101^RecName: Full=UDP-glycosyltransferase 74E2;^Eukaryota; Viridiplantae; Streptophyta; Embryophyta; Tracheophyta; Spermatophyta; Magnoliophyta; eudicotyledons; Gunneridae; Pentapetalae; rosids; malvids; Brassicales; Brassicaceae; Camelineae; Arabidopsis	Gene.77909::c30790_g2_i9::g.77909::m.77909	221-1162[+]	.	COG1819^Transferase	KEGG:ath:AT1G05680	GO:0043231^cellular_component^intracellular membrane-bounded organelle`GO:0052638^molecular_function^indole-3-butyrate beta-glucosyltransferase activity`GO:0080043^molecular_function^quercetin 3-O-glucosyltransferase activity`GO:0080044^molecular_function^quercetin 7-O-glucosyltransferase activity`GO:0035251^molecular_function^UDP-glucosyltransferase activity`GO:0071475^biological_process^cellula…	.
c26291_g1_i6	-Inf	2.69932369834865e-05	0.0114292934741732	c26291_g1	XRN3_ARATH^XRN3_ARATH^Q:4674-2395,H:1-745^77.559%ID^E:0^RecName: Full=5'-3' exoribonuclease 3;^Eukaryota; Viridiplantae; Streptophyta; Embryophyta; Tracheophyta; Spermatophyta; Magnoliophyta; eudicotyledons; Gunneridae; Pentapetalae; rosids; malvids; Brassicales; Brassicaceae; Camelineae; Arabidopsis`XRN3_ARATH^XRN3_ARATH^Q:1933-1397,H:667-876^45.714%ID^E:5.59e-44^RecName: Full=5'-3' exoribonucle…	Gene.34421::c26291_g1_i6::g.34421::m.34421	4674-2284[-]	PF03159.15^XRN_N^XRN 5'-3' exonuclease N-terminus^1-253^E:1.2e-97`PF14392.3^zf-CCHC_4^Zinc knuckle^262-278^E:0.058`PF00098.20^zf-CCHC^Zinc knuckle^263-277^E:4.1e-05	COG5049^5'-3' exoribonuclease	KEGG:ath:AT1G75660`KO:K12619	GO:0005634^cellular_component^nucleus`GO:0004534^molecular_function^5'-3' exoribonuclease activity`GO:0003676^molecular_function^nucleic acid binding`GO:0008270^molecular_function^zinc ion binding`GO:0010587^biological_process^miRNA catabolic process`GO:0006397^biological_process^mRNA processing	GO:0003676^molecular_function^nucleic acid binding`GO:0004527^molecular_function^exonuclease activity`GO:0008270^molecular_function^zinc ion binding
c23626_g1_i4	-Inf	3.1932480469897e-05	0.0130879741753139	c23626_g1	Y1365_METJA^Y1365_METJA^Q:975-1613,H:29-237^30.841%ID^E:4.3e-16^RecName: Full=Uncharacterized protein MJ1365;^Archaea; Euryarchaeota; Methanococci; Methanococcales; Methanocaldococcaceae; Methanocaldococcus	Gene.19730::c23626_g1_i4::g.19730::m.19730	1095-1730[+]	PF01963.14^TraB^TraB family^36-166^E:2.2e-19	COG1916^traB family	KEGG:mja:MJ_1365	GO:0016021^cellular_component^integral component of membrane`GO:0005886^cellular_component^plasma membrane	.
c25867_g4_i13	-Inf	3.1932480469897e-05	0.0130879741753139	c25867_g4	UBP22_ARATH^UBP22_ARATH^Q:368-1237,H:11-287^40.717%ID^E:1.17e-60^RecName: Full=Ubiquitin carboxyl-terminal hydrolase 22;^Eukaryota; Viridiplantae; Streptophyta; Embryophyta; Tracheophyta; Spermatophyta; Magnoliophyta; eudicotyledons; Gunneridae; Pentapetalae; rosids; malvids; Brassicales; Brassicaceae; Camelineae; Arabidopsis	Gene.31587::c25867_g4_i13::g.31587::m.31587	320-1261[+]	PF02148.16^zf-UBP^Zn-finger in ubiquitin-hydrolases and other protein^63-131^E:1.8e-09`PF00443.26^UCH^Ubiquitin carboxyl-terminal hydrolase^196-305^E:4e-26`PF13423.3^UCH_1^Ubiquitin carboxyl-terminal hydrolase^197-305^E:1.6e-08	ENOG410XQQ0^ubiquitin carboxyl-terminal hydrolase	KEGG:ath:AT5G10790`KO:K11366	GO:0008234^molecular_function^cysteine-type peptidase activity`GO:0036459^molecular_function^thiol-dependent ubiquitinyl hydrolase activity`GO:0008270^molecular_function^zinc ion binding`GO:0016579^biological_process^protein deubiquitination`GO:0006511^biological_process^ubiquitin-dependent protein catabolic process	GO:0008270^molecular_function^zinc ion binding`GO:0036459^molecular_function^thiol-dependent ubiquitinyl hydrolase activity`GO:0016579^biological_process^protein deubiquitination
c29721_g1_i5	-Inf	3.1932480469897e-05	0.0130879741753139	c29721_g1	GLR32_ARATH^GLR32_ARATH^Q:670-3363,H:21-907^66.007%ID^E:0^RecName: Full=Glutamate receptor 3.2;^Eukaryota; Viridiplantae; Streptophyta; Embryophyta; Tracheophyta; Spermatophyta; Magnoliophyta; eudicotyledons; Gunneridae; Pentapetalae; rosids; malvids; Brassicales; Brassicaceae; Camelineae; Arabidopsis	Gene.66107::c29721_g1_i5::g.66107::m.66107	754-3399[+]	PF01094.25^ANF_receptor^Receptor family ligand binding region^1-355^E:5.4e-76`PF13458.3^Peripla_BP_6^Periplasmic binding protein^2-281^E:7e-12`PF00497.17^SBP_bac_3^Bacterial extracellular solute-binding proteins, family 3^471-751^E:1.1e-22`PF00060.23^Lig_chan^Ligand-gated ion channel^536-783^E:3.8e-37	ENOG410XPSH^Glutamate receptor, ionotropic	KEGG:ath:AT4G35290	GO:0016021^cellular_component^integral component of membrane`GO:0005622^cellular_component^intracellular`GO:0005886^cellular_component^plasma membrane`GO:0005262^molecular_function^calcium channel activity`GO:0008066^molecular_function^glutamate receptor activity`GO:0004970^molecular_function^ionotropic glutamate receptor activity`GO:0070588^biological_process^calcium ion transmembrane transport`…	GO:0004970^molecular_function^ionotropic glutamate receptor activity`GO:0016020^cellular_component^membrane
c27122_g1_i3	-Inf	3.1932480469897e-05	0.0130879741753139	c27122_g1	PPR10_ARATH^PPR10_ARATH^Q:166-2067,H:29-665^55.486%ID^E:0^RecName: Full=Pentatricopeptide repeat-containing protein At1g04840;^Eukaryota; Viridiplantae; Streptophyta; Embryophyta; Tracheophyta; Spermatophyta; Magnoliophyta; eudicotyledons; Gunneridae; Pentapetalae; rosids; malvids; Brassicales; Brassicaceae; Camelineae; Arabidopsis	Gene.40914::c27122_g1_i3::g.40914::m.40914	82-2070[+]	PF01535.17^PPR^PPR repeat^94-123^E:0.17`PF01535.17^PPR^PPR repeat^196-223^E:3.1e-08`PF12854.4^PPR_1^PPR repeat^196-219^E:7.6e-07`PF01535.17^PPR^PPR repeat^226-255^E:3.5e-07`PF01535.17^PPR^PPR repeat^256-286^E:8.8e-08`PF01535.17^PPR^PPR repeat^329-355^E:0.11`PF01535.17^PPR^PPR repeat^358-387^E:0.00013`PF13812.3^PPR_3^Pentatricopeptide repeat domain^379-438^E:0.0006`PF14432.3^DYW_deaminase^DYW fami…	ENOG410Z7Z7^Pentatricopeptide repeat-containing protein	KEGG:ath:AT1G04840	.	GO:0008270^molecular_function^zinc ion binding
c30390_g1_i2	-Inf	3.77776476684774e-05	0.0147183439011339	c30390_g1	GG3_ARATH^GG3_ARATH^Q:643-786,H:43-90^70.833%ID^E:5.82e-12^RecName: Full=Guanine nucleotide-binding protein subunit gamma 3;^Eukaryota; Viridiplantae; Streptophyta; Embryophyta; Tracheophyta; Spermatophyta; Magnoliophyta; eudicotyledons; Gunneridae; Pentapetalae; rosids; malvids; Brassicales; Brassicaceae; Camelineae; Arabidopsis	Gene.73345::c30390_g1_i2::g.73345::m.73345	753-1571[+]	.	ENOG410YVBK^NA	KEGG:ath:AT5G20635	GO:0005834^cellular_component^heterotrimeric G-protein complex`GO:0005886^cellular_component^plasma membrane`GO:0004871^molecular_function^signal transducer activity`GO:0007186^biological_process^G-protein coupled receptor signaling pathway`GO:0009737^biological_process^response to abscisic acid	.
c26323_g2_i2	-Inf	3.77776476684774e-05	0.0147183439011339	c26323_g2	C3H18_ARATH^C3H18_ARATH^Q:420-2159,H:1-535^53.288%ID^E:1.73e-161^RecName: Full=Zinc finger CCCH domain-containing protein 18;^Eukaryota; Viridiplantae; Streptophyta; Embryophyta; Tracheophyta; Spermatophyta; Magnoliophyta; eudicotyledons; Gunneridae; Pentapetalae; rosids; malvids; Brassicales; Brassicaceae; Camelineae; Arabidopsis	Gene.34658::c26323_g2_i2::g.34658::m.34658	420-2165[+]	PF12872.4^OST-HTH^OST-HTH/LOTUS domain^245-324^E:1.3e-14`PF00076.19^RRM_1^RNA recognition motif. (a.k.a. RRM, RBD, or RNP domain)^362-408^E:3.9e-07	ENOG410YDMG^zinc finger CCCH domain-containing protein	KEGG:ath:AT2G05160	GO:0003677^molecular_function^DNA binding`GO:0046872^molecular_function^metal ion binding`GO:0004518^molecular_function^nuclease activity`GO:0000166^molecular_function^nucleotide binding`GO:0003723^molecular_function^RNA binding	GO:0003676^molecular_function^nucleic acid binding
c28075_g7_i6	-Inf	3.77776476684774e-05	0.0147183439011339	c28075_g7	FBL4_ARATH^FBL4_ARATH^Q:2179-359,H:1-610^72.459%ID^E:0^RecName: Full=F-box/LRR-repeat protein 4;^Eukaryota; Viridiplantae; Streptophyta; Embryophyta; Tracheophyta; Spermatophyta; Magnoliophyta; eudicotyledons; Gunneridae; Pentapetalae; rosids; malvids; Brassicales; Brassicaceae; Camelineae; Arabidopsis	Gene.49010::c28075_g7_i6::g.49010::m.49010	2179-356[-]	PF12937.4^F-box-like^F-box-like^10-39^E:2.4e-07`PF00646.30^F-box^F-box domain^10-41^E:0.00021`PF13516.3^LRR_6^Leucine Rich repeat^162-183^E:0.022`PF13516.3^LRR_6^Leucine Rich repeat^187-210^E:0.4`PF13516.3^LRR_6^Leucine Rich repeat^316-339^E:0.37`PF13516.3^LRR_6^Leucine Rich repeat^345-364^E:0.13`PF13516.3^LRR_6^Leucine Rich repeat^420-441^E:2`PF13516.3^LRR_6^Leucine Rich repeat^445-468^E:0.0075`…	ENOG410XQ54^F-box and leucine-rich repeat protein	KEGG:ath:AT4G15475`KO:K10268	.	GO:0005515^molecular_function^protein binding
c28135_g1_i10	-Inf	3.77776476684774e-05	0.0147183439011339	c28135_g1	PI5K8_ARATH^PI5K8_ARATH^Q:4190-2331,H:4-614^65.161%ID^E:0^RecName: Full=Phosphatidylinositol 4-phosphate 5-kinase 8;^Eukaryota; Viridiplantae; Streptophyta; Embryophyta; Tracheophyta; Spermatophyta; Magnoliophyta; eudicotyledons; Gunneridae; Pentapetalae; rosids; malvids; Brassicales; Brassicaceae; Camelineae; Arabidopsis	Gene.49579::c28135_g1_i10::g.49579::m.49579	4205-2295[-]	PF02493.17^MORN^MORN repeat^18-40^E:1.8e-06`PF02493.17^MORN^MORN repeat^41-60^E:0.0007`PF02493.17^MORN^MORN repeat^64-86^E:4.1e-05`PF02493.17^MORN^MORN repeat^87-108^E:0.0019`PF02493.17^MORN^MORN repeat^110-132^E:0.0013`PF02493.17^MORN^MORN repeat^133-154^E:3.4e-06`PF02493.17^MORN^MORN repeat^156-177^E:2.9e-06`PF02493.17^MORN^MORN repeat^179-199^E:0.01`PF01504.15^PIP5K^Phosphatidylinositol-4-phos…	COG4642^whole genome shotgun sequence`COG5253^phosphatidylinositol-4-phosphate 5-kinase	.	GO:0016308^molecular_function^1-phosphatidylinositol-4-phosphate 5-kinase activity`GO:0005524^molecular_function^ATP binding	GO:0016307^molecular_function^phosphatidylinositol phosphate kinase activity`GO:0046488^biological_process^phosphatidylinositol metabolic process
c28992_g2_i10	-Inf	3.77776476684774e-05	0.0147183439011339	c28992_g2	ASF1A_ARATH^ASF1A_ARATH^Q:2439-1912,H:1-176^81.25%ID^E:4.46e-94^RecName: Full=Probable histone chaperone ASF1A;^Eukaryota; Viridiplantae; Streptophyta; Embryophyta; Tracheophyta; Spermatophyta; Magnoliophyta; eudicotyledons; Gunneridae; Pentapetalae; rosids; malvids; Brassicales; Brassicaceae; Camelineae; Arabidopsis	Gene.58481::c28992_g2_i10::g.58481::m.58481	2439-1891[-]	PF04729.10^ASF1_hist_chap^ASF1 like histone chaperone^1-153^E:5e-70	COG5137^ASF1 anti-silencing function 1 homolog	KEGG:ath:AT1G66740`KO:K10753	GO:0005737^cellular_component^cytoplasm`GO:0005634^cellular_component^nucleus`GO:0051301^biological_process^cell division`GO:0006333^biological_process^chromatin assembly or disassembly`GO:0016568^biological_process^chromatin modification`GO:0000724^biological_process^double-strand break repair via homologous recombination`GO:0031567^biological_process^mitotic cell size control checkpoint`GO:0008…	GO:0006333^biological_process^chromatin assembly or disassembly`GO:0005634^cellular_component^nucleus
c22875_g1_i4	-Inf	3.77776476684774e-05	0.0147183439011339	c22875_g1	.	.	.	.	.	.	.	.
c23158_g1_i8	-Inf	4.46952776937691e-05	0.0170250792720065	c23158_g1	ECH2_ARATH^ECH2_ARATH^Q:206-808,H:1-200^65.174%ID^E:9.07e-86^RecName: Full=Enoyl-CoA hydratase 2, peroxisomal;^Eukaryota; Viridiplantae; Streptophyta; Embryophyta; Tracheophyta; Spermatophyta; Magnoliophyta; eudicotyledons; Gunneridae; Pentapetalae; rosids; malvids; Brassicales; Brassicaceae; Camelineae; Arabidopsis`ECH2_ARATH^ECH2_ARATH^Q:1707-1880,H:224-281^75.862%ID^E:6.96e-23^RecName: Full=En…	Gene.17766::c23158_g1_i8::g.17766::m.17766	209-841[+]	PF13452.3^MaoC_dehydrat_N^N-terminal half of MaoC dehydratase^13-137^E:9.5e-07	COG2030^maoc domain protein dehydratase	KEGG:ath:AT1G76150`KO:K19658	GO:0005777^cellular_component^peroxisome`GO:0080023^molecular_function^3R-hydroxyacyl-CoA dehydratase activity`GO:0016491^molecular_function^oxidoreductase activity`GO:0033542^biological_process^fatty acid beta-oxidation, unsaturated, even number	.
c27061_g9_i1	-Inf	5.28825920985267e-05	0.0195619771912189	c27061_g9	.	.	.	.	.	.	.	.
c26173_g1_i5	-Inf	5.28825920985267e-05	0.0195619771912189	c26173_g1	PP185_ARATH^PP185_ARATH^Q:4-1560,H:95-613^61.079%ID^E:0^RecName: Full=Pentatricopeptide repeat-containing protein At2g35030, mitochondrial;^Eukaryota; Viridiplantae; Streptophyta; Embryophyta; Tracheophyta; Spermatophyta; Magnoliophyta; eudicotyledons; Gunneridae; Pentapetalae; rosids; malvids; Brassicales; Brassicaceae; Camelineae; Arabidopsis`PP185_ARATH^PP185_ARATH^Q:187-1194,H:62-390^35.088%I…	Gene.33546::c26173_g1_i5::g.33546::m.33546	1-1569[+]	PF01535.17^PPR^PPR repeat^17-45^E:2.1e-06`PF13041.3^PPR_2^PPR repeat family^45-77^E:3.6e-09`PF12854.4^PPR_1^PPR repeat^46-74^E:1.3e-06`PF01535.17^PPR^PPR repeat^48-77^E:2.5e-08`PF12854.4^PPR_1^PPR repeat^76-104^E:2.8e-06`PF01535.17^PPR^PPR repeat^79-108^E:1.5e-07`PF12854.4^PPR_1^PPR repeat^106-135^E:5.9e-07`PF01535.17^PPR^PPR repeat^110-140^E:1.6e-07`PF12854.4^PPR_1^PPR repeat^138-166^E:4.9e-07`P…	ENOG410Z7Z7^Pentatricopeptide repeat-containing protein	KEGG:ath:AT2G35030	GO:0005739^cellular_component^mitochondrion	.
c30469_g5_i8	-Inf	5.28825920985267e-05	0.0195619771912189	c30469_g5	TPPA_ARATH^TPPA_ARATH^Q:2118-1018,H:1-370^66.845%ID^E:3.53e-169^RecName: Full=Trehalose-phosphate phosphatase A;^Eukaryota; Viridiplantae; Streptophyta; Embryophyta; Tracheophyta; Spermatophyta; Magnoliophyta; eudicotyledons; Gunneridae; Pentapetalae; rosids; malvids; Brassicales; Brassicaceae; Camelineae; Arabidopsis	Gene.74316::c30469_g5_i8::g.74316::m.74316	2118-970[-]	PF02358.13^Trehalose_PPase^Trehalose-phosphatase^121-365^E:3.1e-75	COG1877^trehalose biosynthetic process	KEGG:ath:AT5G51460`KO:K01087	GO:0004805^molecular_function^trehalose-phosphatase activity`GO:0016311^biological_process^dephosphorylation`GO:0005992^biological_process^trehalose biosynthetic process	GO:0003824^molecular_function^catalytic activity`GO:0005992^biological_process^trehalose biosynthetic process
c24710_g1_i3	-Inf	5.28825920985267e-05	0.0195619771912189	c24710_g1	PUX8_ARATH^PUX8_ARATH^Q:1579-2535,H:217-563^39.286%ID^E:3.86e-54^RecName: Full=Plant UBX domain-containing protein 8 {ECO:0000303|Ref.5};^Eukaryota; Viridiplantae; Streptophyta; Embryophyta; Tracheophyta; Spermatophyta; Magnoliophyta; eudicotyledons; Gunneridae; Pentapetalae; rosids; malvids; Brassicales; Brassicaceae; Camelineae; Arabidopsis	Gene.24976::c24710_g1_i3::g.24976::m.24976	1570-2541[+]	PF02809.17^UIM^Ubiquitin interaction motif^17-31^E:0.12`PF00789.17^UBX^UBX domain^242-321^E:2.5e-14	ENOG410XSFS^Fas associated factor family member 2	KEGG:ath:AT4G11740	GO:0005829^cellular_component^cytosol`GO:0005634^cellular_component^nucleus`GO:0016192^biological_process^vesicle-mediated transport	GO:0005515^molecular_function^protein binding
c29508_g1_i6	-Inf	6.25731592164572e-05	0.0220941801816976	c29508_g1	YL154_YEAST^YL154_YEAST^Q:120-239,H:10-49^67.5%ID^E:2.73e-10^RecName: Full=Uncharacterized protein YLR154C-G;^Eukaryota; Fungi; Dikarya; Ascomycota; Saccharomycotina; Saccharomycetes; Saccharomycetales; Saccharomycetaceae; Saccharomyces	.	.	.	.	KEGG:sce:YLR154C-G	.	.
c28267_g1_i1	-Inf	6.25731592164572e-05	0.0220941801816976	c28267_g1	NADAP_HUMAN^NADAP_HUMAN^Q:574-500,H:772-796^80%ID^E:9.16e-06^RecName: Full=Kanadaptin;^Eukaryota; Metazoa; Chordata; Craniata; Vertebrata; Euteleostomi; Mammalia; Eutheria; Euarchontoglires; Primates; Haplorrhini; Catarrhini; Hominidae; Homo	Gene.50794::c28267_g1_i1::g.50794::m.50794	1744-497[-]	.	ENOG410XR6C^Solute carrier family 4 (Anion exchanger), member 1, adaptor protein	KEGG:hsa:22950	GO:0005737^cellular_component^cytoplasm`GO:0043231^cellular_component^intracellular membrane-bounded organelle`GO:0005654^cellular_component^nucleoplasm`GO:0005634^cellular_component^nucleus`GO:0005886^cellular_component^plasma membrane	.
c29280_g3_i3	-Inf	6.25731592164572e-05	0.0220941801816976	c29280_g3	Y1917_SYNY3^Y1917_SYNY3^Q:2773-1496,H:2-409^37.324%ID^E:8.58e-92^RecName: Full=Oxygen-independent coproporphyrinogen-III oxidase-like protein sll1917;^Bacteria; Cyanobacteria; Oscillatoriophycideae; Chroococcales; Synechocystis	Gene.61534::c29280_g3_i3::g.61534::m.61534	2908-1490[-]	PF04055.18^Radical_SAM^Radical SAM superfamily^58-239^E:2.8e-19	.	.	GO:0005737^cellular_component^cytoplasm`GO:0051537^molecular_function^2 iron, 2 sulfur cluster binding`GO:0051539^molecular_function^4 iron, 4 sulfur cluster binding`GO:0004109^molecular_function^coproporphyrinogen oxidase activity`GO:0046872^molecular_function^metal ion binding`GO:0006779^biological_process^porphyrin-containing compound biosynthetic process`GO:0006782^biological_process^protopor…	GO:0003824^molecular_function^catalytic activity`GO:0051536^molecular_function^iron-sulfur cluster binding
c23413_g3_i7	-Inf	6.25731592164572e-05	0.0220941801816976	c23413_g3	HA22I_ARATH^HA22I_ARATH^Q:313-780,H:1-156^83.974%ID^E:2.51e-92^RecName: Full=HVA22-like protein i;^Eukaryota; Viridiplantae; Streptophyta; Embryophyta; Tracheophyta; Spermatophyta; Magnoliophyta; eudicotyledons; Gunneridae; Pentapetalae; rosids; malvids; Brassicales; Brassicaceae; Camelineae; Arabidopsis	Gene.18804::c23413_g3_i7::g.18804::m.18804	313-804[+]	PF03134.16^TB2_DP1_HVA22^TB2/DP1, HVA22 family^19-97^E:1.6e-24	COG5052^receptor accessory protein	.	.	.
c29246_g1_i1	-Inf	6.25731592164572e-05	0.0220941801816976	c29246_g1	DME_ARATH^DME_ARATH^Q:1242-691,H:1834-1987^67.391%ID^E:7.28e-69^RecName: Full=Transcriptional activator DEMETER;^Eukaryota; Viridiplantae; Streptophyta; Embryophyta; Tracheophyta; Spermatophyta; Magnoliophyta; eudicotyledons; Gunneridae; Pentapetalae; rosids; malvids; Brassicales; Brassicaceae; Camelineae; Arabidopsis`DME_ARATH^DME_ARATH^Q:5063-3354,H:1005-1574^38.265%ID^E:2.93e-67^RecName: Full=…	Gene.61183::c29246_g1_i1::g.61183::m.61183	8686-5774[-]	.	COG0177^endonuclease III	KEGG:ath:AT2G36490	GO:0005730^cellular_component^nucleolus`GO:0005634^cellular_component^nucleus`GO:0051539^molecular_function^4 iron, 4 sulfur cluster binding`GO:0003677^molecular_function^DNA binding`GO:0019104^molecular_function^DNA N-glycosylase activity`GO:0003906^molecular_function^DNA-(apurinic or apyrimidinic site) lyase activity`GO:0046872^molecular_function^metal ion binding`GO:0006284^biological_process^…	.
c45200_g1_i1	-Inf	6.25731592164572e-05	0.0220941801816976	c45200_g1	EF2_BETVU^EF2_BETVU^Q:3-875,H:552-842^93.814%ID^E:0^RecName: Full=Elongation factor 2;^Eukaryota; Viridiplantae; Streptophyta; Embryophyta; Tracheophyta; Spermatophyta; Magnoliophyta; eudicotyledons; Gunneridae; Pentapetalae; Caryophyllales; Amaranthaceae; Beta	Gene.89111::c45200_g1_i1::g.89111::m.89111	3-881[+]	PF03764.15^EFG_IV^Elongation factor G, domain IV^59-171^E:8.7e-35`PF00679.21^EFG_C^Elongation factor G C-terminus^173-260^E:2.1e-21	.	KEGG:bvg:104906141`KO:K03234	GO:0005737^cellular_component^cytoplasm`GO:0005525^molecular_function^GTP binding`GO:0003924^molecular_function^GTPase activity`GO:0003746^molecular_function^translation elongation factor activity	GO:0005525^molecular_function^GTP binding
c26029_g2_i3	-Inf	6.25731592164572e-05	0.0220941801816976	c26029_g2	ZDH15_ARATH^ZDH15_ARATH^Q:170-679,H:1-154^59.195%ID^E:5.63e-44^RecName: Full=Probable protein S-acyltransferase 12;^Eukaryota; Viridiplantae; Streptophyta; Embryophyta; Tracheophyta; Spermatophyta; Magnoliophyta; eudicotyledons; Gunneridae; Pentapetalae; rosids; malvids; Brassicales; Brassicaceae; Camelineae; Arabidopsis`ZDH15_ARATH^ZDH15_ARATH^Q:1172-1378,H:166-234^68.116%ID^E:4.01e-21^RecName: …	Gene.32669::c26029_g2_i3::g.32669::m.32669	164-733[+]	PF01529.17^zf-DHHC^DHHC palmitoyltransferase^129-186^E:6.3e-25	COG5273^Zinc finger, DHHC-type containing	KEGG:ath:AT4G00840	GO:0016021^cellular_component^integral component of membrane`GO:0005886^cellular_component^plasma membrane`GO:0019706^molecular_function^protein-cysteine S-palmitoyltransferase activity`GO:0008270^molecular_function^zinc ion binding	GO:0008270^molecular_function^zinc ion binding
c30360_g6_i2	-Inf	7.40436061238025e-05	0.0251223580962965	c30360_g6	.	.	.	.	.	.	.	.
c26746_g1_i6	-Inf	7.40436061238025e-05	0.0251223580962965	c26746_g1	MARF1_XENTR^MARF1_XENTR^Q:999-1496,H:339-489^27.545%ID^E:8.06e-07^RecName: Full=Meiosis arrest female protein 1 homolog;^Eukaryota; Metazoa; Chordata; Craniata; Vertebrata; Euteleostomi; Amphibia; Batrachia; Anura; Pipoidea; Pipidae; Xenopodinae; Xenopus; Silurana	Gene.37932::c26746_g1_i6::g.37932::m.37932	867-2450[+]	PF01936.15^NYN^NYN domain^45-185^E:5.1e-28`PF12872.4^OST-HTH^OST-HTH/LOTUS domain^314-376^E:1.8e-08`PF12872.4^OST-HTH^OST-HTH/LOTUS domain^453-518^E:3.2e-07	ENOG410XQFX^kiaa0430	KEGG:xtr:733745`KO:K17573	GO:0005777^cellular_component^peroxisome`GO:0000166^molecular_function^nucleotide binding`GO:0003723^molecular_function^RNA binding`GO:0051321^biological_process^meiotic cell cycle`GO:0048477^biological_process^oogenesis`GO:0010468^biological_process^regulation of gene expression	.
c28601_g1_i4	-Inf	7.40436061238025e-05	0.0251223580962965	c28601_g1	P2C71_ORYSJ^P2C71_ORYSJ^Q:1281-967,H:263-367^53.333%ID^E:7.26e-40^RecName: Full=Probable protein phosphatase 2C 71;^Eukaryota; Viridiplantae; Streptophyta; Embryophyta; Tracheophyta; Spermatophyta; Magnoliophyta; Liliopsida; Poales; Poaceae; BOP clade; Oryzoideae; Oryzeae; Oryzinae; Oryza`P2C71_ORYSJ^P2C71_ORYSJ^Q:1460-1377,H:237-264^78.571%ID^E:7.26e-40^RecName: Full=Probable protein phosphatase…	Gene.54121::c28601_g1_i4::g.54121::m.54121	2605-1418[-]	.	.	.	.	.
c21199_g1_i7	-Inf	8.7621572269327e-05	0.0290557670684429	c21199_g1	HEXP_LEIMA^HEXP_LEIMA^Q:2950-3576,H:15-270^30.357%ID^E:1.24e-21^RecName: Full=DNA-binding protein HEXBP;^Eukaryota; Euglenozoa; Kinetoplastida; Trypanosomatidae; Leishmaniinae; Leishmania`HEXP_LEIMA^HEXP_LEIMA^Q:2941-3372,H:66-271^28.019%ID^E:9.57e-13^RecName: Full=DNA-binding protein HEXBP;^Eukaryota; Euglenozoa; Kinetoplastida; Trypanosomatidae; Leishmaniinae; Leishmania`HEXP_LEIMA^HEXP_LEIMA^Q…	Gene.11104::c21199_g1_i7::g.11104::m.11104	3100-3612[+]	PF00098.20^zf-CCHC^Zinc knuckle^10-25^E:3.7e-05`PF14392.3^zf-CCHC_4^Zinc knuckle^10-25^E:2.1`PF00098.20^zf-CCHC^Zinc knuckle^36-52^E:0.0014`PF13917.3^zf-CCHC_3^Zinc knuckle^53-71^E:0.13`PF14392.3^zf-CCHC_4^Zinc knuckle^54-70^E:1.3`PF00098.20^zf-CCHC^Zinc knuckle^55-71^E:1.6e-06`PF00098.20^zf-CCHC^Zinc knuckle^74-90^E:0.00089`PF14392.3^zf-CCHC_4^Zinc knuckle^74-90^E:0.08`PF00098.20^zf-CCHC^Zinc kn…	.	KEGG:sce:YNL255C`KO:K09250	GO:0000932^cellular_component^cytoplasmic mRNA processing body`GO:0010494^cellular_component^cytoplasmic stress granule`GO:0042788^cellular_component^polysomal ribosome`GO:0003729^molecular_function^mRNA binding`GO:0003697^molecular_function^single-stranded DNA binding`GO:0045182^molecular_function^translation regulator activity`GO:0008270^molecular_function^zinc ion binding`GO:0045727^biological…	GO:0003676^molecular_function^nucleic acid binding`GO:0008270^molecular_function^zinc ion binding
c31248_g1_i6	-Inf	8.7621572269327e-05	0.0290557670684429	c31248_g1	BGAL1_ARATH^BGAL1_ARATH^Q:2345-507,H:235-847^82.708%ID^E:0^RecName: Full=Beta-galactosidase 1;^Eukaryota; Viridiplantae; Streptophyta; Embryophyta; Tracheophyta; Spermatophyta; Magnoliophyta; eudicotyledons; Gunneridae; Pentapetalae; rosids; malvids; Brassicales; Brassicaceae; Camelineae; Arabidopsis	Gene.83034::c31248_g1_i6::g.83034::m.83034	2366-504[-]	PF01301.16^Glyco_hydro_35^Glycosyl hydrolases family 35^7-118^E:4.2e-35`PF02140.15^Gal_Lectin^Galactose binding lectin domain^542-619^E:4.4e-20	COG1874^beta-galactosidase	KEGG:ath:AT3G13750	GO:0048046^cellular_component^apoplast`GO:0005618^cellular_component^cell wall`GO:0009505^cellular_component^plant-type cell wall`GO:0009506^cellular_component^plasmodesma`GO:0004565^molecular_function^beta-galactosidase activity`GO:0030246^molecular_function^carbohydrate binding`GO:0005975^biological_process^carbohydrate metabolic process	GO:0030246^molecular_function^carbohydrate binding
c28931_g1_i1	-Inf	0.00010369513480231	0.0337308751830268	c28931_g1	RD21A_ARATH^RD21A_ARATH^Q:413-1057,H:23-237^70.136%ID^E:3.07e-102^RecName: Full=Cysteine proteinase RD21a;^Eukaryota; Viridiplantae; Streptophyta; Embryophyta; Tracheophyta; Spermatophyta; Magnoliophyta; eudicotyledons; Gunneridae; Pentapetalae; rosids; malvids; Brassicales; Brassicaceae; Camelineae; Arabidopsis`RD21A_ARATH^RD21A_ARATH^Q:1132-1287,H:236-287^65.385%ID^E:3.07e-102^RecName: Full=Cys…	Gene.57765::c28931_g1_i1::g.57765::m.57765	341-1231[+]	PF08246.9^Inhibitor_I29^Cathepsin propeptide inhibitor domain (I29)^51-107^E:1.5e-18`PF00112.20^Peptidase_C1^Papain family cysteine protease^139-242^E:5.8e-41	COG4870^cathepsin	KEGG:ath:AT1G47128	GO:0048046^cellular_component^apoplast`GO:0009507^cellular_component^chloroplast`GO:0005615^cellular_component^extracellular space`GO:0005764^cellular_component^lysosome`GO:0009506^cellular_component^plasmodesma`GO:0005773^cellular_component^vacuole`GO:0004197^molecular_function^cysteine-type endopeptidase activity`GO:0008234^molecular_function^cysteine-type peptidase activity`GO:0008233^molecula…	GO:0008234^molecular_function^cysteine-type peptidase activity`GO:0006508^biological_process^proteolysis
c24801_g1_i7	-Inf	0.00010369513480231	0.0337308751830268	c24801_g1	FBK29_ARATH^FBK29_ARATH^Q:1988-705,H:9-451^60.722%ID^E:0^RecName: Full=F-box/kelch-repeat protein At1g74510;^Eukaryota; Viridiplantae; Streptophyta; Embryophyta; Tracheophyta; Spermatophyta; Magnoliophyta; eudicotyledons; Gunneridae; Pentapetalae; rosids; malvids; Brassicales; Brassicaceae; Camelineae; Arabidopsis	Gene.25491::c24801_g1_i7::g.25491::m.25491	2027-702[-]	PF01344.22^Kelch_1^Kelch motif^223-268^E:5.4e-10`PF01344.22^Kelch_1^Kelch motif^271-317^E:4.3e-07	ENOG4110X8D^Kelch repeat-containing F-box family protein	KEGG:ath:AT1G74510	GO:0005634^cellular_component^nucleus	GO:0005515^molecular_function^protein binding
c20646_g1_i1	-Inf	0.00010369513480231	0.0337308751830268	c20646_g1	LAC5_ARATH^LAC5_ARATH^Q:2046-1063,H:202-538^65.282%ID^E:0^RecName: Full=Laccase-5;^Eukaryota; Viridiplantae; Streptophyta; Embryophyta; Tracheophyta; Spermatophyta; Magnoliophyta; eudicotyledons; Gunneridae; Pentapetalae; rosids; malvids; Brassicales; Brassicaceae; Camelineae; Arabidopsis`LAC5_ARATH^LAC5_ARATH^Q:2631-2386,H:86-167^67.073%ID^E:0^RecName: Full=Laccase-5;^Eukaryota; Viridiplantae; S…	Gene.9595::c20646_g1_i1::g.9595::m.9595	1959-1009[-]	PF00394.19^Cu-oxidase^Multicopper oxidase^2-82^E:7.9e-24`PF07731.11^Cu-oxidase_2^Multicopper oxidase^191-300^E:9.9e-27	COG2132^Multicopper oxidase	KEGG:ath:AT2G30210`KO:K05909	GO:0048046^cellular_component^apoplast`GO:0005507^molecular_function^copper ion binding`GO:0052716^molecular_function^hydroquinone:oxygen oxidoreductase activity`GO:0016722^molecular_function^oxidoreductase activity, oxidizing metal ions`GO:0046274^biological_process^lignin catabolic process	GO:0016491^molecular_function^oxidoreductase activity`GO:0055114^biological_process^oxidation-reduction process`GO:0005507^molecular_function^copper ion binding
c27228_g4_i7	-Inf	0.000122723978280868	0.0385923692260742	c27228_g4	CYP5F_ARATH^CYP5F_ARATH^Q:417-196,H:47-120^83.784%ID^E:6.7e-41^RecName: Full=Cytochrome B5-like protein {ECO:0000303|PubMed:19054355};^Eukaryota; Viridiplantae; Streptophyta; Embryophyta; Tracheophyta; Spermatophyta; Magnoliophyta; eudicotyledons; Gunneridae; Pentapetalae; rosids; malvids; Brassicales; Brassicaceae; Camelineae; Arabidopsis	Gene.41720::c27228_g4_i7::g.41720::m.41720	543-187[-]	PF00173.25^Cyt-b5^Cytochrome b5-like Heme/Steroid binding domain^48-116^E:5e-21	COG5274^cytochrome b5	KEGG:ath:AT1G60660	GO:0016021^cellular_component^integral component of membrane`GO:0020037^molecular_function^heme binding`GO:0046872^molecular_function^metal ion binding	.
c27653_g1_i3	-Inf	0.000122723978280868	0.0385923692260742	c27653_g1	.	Gene.45182::c27653_g1_i3::g.45182::m.45182	2744-345[-]	PF14392.3^zf-CCHC_4^Zinc knuckle^537-552^E:8.7`PF14392.3^zf-CCHC_4^Zinc knuckle^573-593^E:2.6`PF03126.15^Plus-3^Plus-3 domain^709-772^E:1.1e-06	.	.	.	GO:0003677^molecular_function^DNA binding
c22223_g1_i5	-Inf	0.000122723978280868	0.0385923692260742	c22223_g1	CCT1_ARATH^CCT1_ARATH^Q:2304-1723,H:31-225^87.179%ID^E:2.43e-117^RecName: Full=Choline-phosphate cytidylyltransferase 1;^Eukaryota; Viridiplantae; Streptophyta; Embryophyta; Tracheophyta; Spermatophyta; Magnoliophyta; eudicotyledons; Gunneridae; Pentapetalae; rosids; malvids; Brassicales; Brassicaceae; Camelineae; Arabidopsis`CCT1_ARATH^CCT1_ARATH^Q:235-116,H:225-264^80%ID^E:7.33e-12^RecName: Ful…	Gene.14251::c22223_g1_i5::g.14251::m.14251	2376-1717[-]	PF01467.23^CTP_transf_like^Cytidylyltransferase-like^32-161^E:1.5e-33	COG0615^cytidylyltransferase	KEGG:ath:AT2G32260`KO:K00968	GO:0004105^molecular_function^choline-phosphate cytidylyltransferase activity`GO:0006657^biological_process^CDP-choline pathway`GO:0006656^biological_process^phosphatidylcholine biosynthetic process	GO:0003824^molecular_function^catalytic activity`GO:0009058^biological_process^biosynthetic process
c21778_g1_i3	-Inf	0.000122723978280868	0.0385923692260742	c21778_g1	EBS_ARATH^EBS_ARATH^Q:3256-2840,H:1-147^82.313%ID^E:8e-78^RecName: Full=Chromatin remodeling protein EBS {ECO:0000305};^Eukaryota; Viridiplantae; Streptophyta; Embryophyta; Tracheophyta; Spermatophyta; Magnoliophyta; eudicotyledons; Gunneridae; Pentapetalae; rosids; malvids; Brassicales; Brassicaceae; Camelineae; Arabidopsis`EBS_ARATH^EBS_ARATH^Q:2790-2722,H:148-170^100%ID^E:8e-78^RecName: Full=C…	Gene.12812::c21778_g1_i3::g.12812::m.12812	3256-2837[-]	PF01426.15^BAH^BAH domain^23-135^E:1.5e-24	.	KEGG:ath:AT4G22140	GO:0000785^cellular_component^chromatin`GO:0005677^cellular_component^chromatin silencing complex`GO:0005634^cellular_component^nucleus`GO:0003682^molecular_function^chromatin binding`GO:0035064^molecular_function^methylated histone binding`GO:0000976^molecular_function^transcription regulatory region sequence-specific DNA binding`GO:0008270^molecular_function^zinc ion binding`GO:0016568^biologic…	GO:0003682^molecular_function^chromatin binding
c24653_g1_i4	-Inf	0.000122723978280868	0.0385923692260742	c24653_g1	KELP_ARATH^KELP_ARATH^Q:1929-1468,H:13-165^53.165%ID^E:4.73e-45^RecName: Full=RNA polymerase II transcriptional coactivator KELP;^Eukaryota; Viridiplantae; Streptophyta; Embryophyta; Tracheophyta; Spermatophyta; Magnoliophyta; eudicotyledons; Gunneridae; Pentapetalae; rosids; malvids; Brassicales; Brassicaceae; Camelineae; Arabidopsis	Gene.24712::c24653_g1_i4::g.24712::m.24712	1102-332[-]	PF14223.3^Retrotran_gag_2^gag-polypeptide of LTR copia-type^51-183^E:9.9e-19`PF13917.3^zf-CCHC_3^Zinc knuckle^230-248^E:0.24`PF00098.20^zf-CCHC^Zinc knuckle^232-247^E:0.00044`PF14392.3^zf-CCHC_4^Zinc knuckle^232-247^E:0.26	.	.	.	GO:0003676^molecular_function^nucleic acid binding`GO:0008270^molecular_function^zinc ion binding
c26529_g2_i3	-Inf	0.000145252632004422	0.0446950636365318	c26529_g2	MD33A_ARATH^MD33A_ARATH^Q:334-4308,H:13-1297^41.037%ID^E:0^RecName: Full=Mediator of RNA polymerase II transcription subunit 33A;^Eukaryota; Viridiplantae; Streptophyta; Embryophyta; Tracheophyta; Spermatophyta; Magnoliophyta; eudicotyledons; Gunneridae; Pentapetalae; rosids; malvids; Brassicales; Brassicaceae; Camelineae; Arabidopsis	Gene.36095::c26529_g2_i3::g.36095::m.36095	1486-4344[+]	.	ENOG410XPER^Component of the Mediator complex, a coactivator involved in the regulated transcription of nearly all RNA polymerase II-dependent genes. Mediator functions as a bridge to convey information from gene-specific regulatory proteins to the basal RNA polymerase II transcription machinery. The Mediator complex, having a compact conformation in its free form, is recruited to promoters by di…	KEGG:ath:AT3G23590	GO:0016592^cellular_component^mediator complex`GO:0009698^biological_process^phenylpropanoid metabolic process`GO:2000762^biological_process^regulation of phenylpropanoid metabolic process`GO:0006355^biological_process^regulation of transcription, DNA-templated`GO:0006351^biological_process^transcription, DNA-templated	.
Up-regulated genes
Down-regulated genes

## Sheet: MINAS control vs aged-seeds 
id	log2FoldChange	pval	padj	#gene_id	sprot_Top_BLASTX_hit	prot_id	prot_coords	Pfam	eggnog	Kegg	gene_ontology_blast	gene_ontology_pfam
c20486_g1_i1	10.8396	8.44464693883342e-32	9.59702457172397e-28	c20486_g1	.	Gene.9237::c20486_g1_i1::g.9237::m.9237	711-1667[+]	PF16506.2^DiSB-ORF2_chro^Putative virion glycoprotein of insect viruses^3-45^E:5.9e-06	.	.	.	.
c27061_g4_i2	10.8397	7.96976104516685e-38	1.20764460823906e-33	c27061_g4	ART2_YEAST^ART2_YEAST^Q:78-236,H:4-56^56.604%ID^E:3.38e-12^RecName: Full=Putative uncharacterized protein ART2;^Eukaryota; Fungi; Dikarya; Ascomycota; Saccharomycotina; Saccharomycetes; Saccharomycetales; Saccharomycetaceae; Saccharomyces	.	.	.	.	.	.	.
c19803_g2_i1	11.0375	8.2708452484144e-39	1.98509331999887e-34	c19803_g2	.	Gene.7768::c19803_g2_i1::g.7768::m.7768	1-315[+]	.	.	.	.	.
c27061_g2_i1	11.0871	8.73365078037714e-39	1.98509331999887e-34	c27061_g2	.	.	.	.	.	.	.	.
c27061_g11_i2	11.1246	5.20554121968714e-40	2.36636095535148e-35	c27061_g11	.	.	.	.	.	.	.	.
c21080_g1_i2	11.2417	2.1648214823219e-38	3.9363814941652e-34	c21080_g1	.	.	.	.	.	.	.	.
c21080_g3_i1	11.3138	1.23169724182504e-40	1.11982218135007e-35	c21080_g3	NLRC3_MOUSE^NLRC3_MOUSE^Q:108-22,H:1-29^72.414%ID^E:7.64e-06^RecName: Full=Protein NLRC3;^Eukaryota; Metazoa; Chordata; Craniata; Vertebrata; Euteleostomi; Mammalia; Eutheria; Euarchontoglires; Glires; Rodentia; Sciurognathi; Muroidea; Muridae; Murinae; Mus; Mus	.	.	.	ENOG410ZBX3^leucine Rich Repeat	KEGG:mmu:268857	GO:0005737^cellular_component^cytoplasm`GO:0005524^molecular_function^ATP binding`GO:0007249^biological_process^I-kappaB kinase/NF-kappaB signaling`GO:0043124^biological_process^negative regulation of I-kappaB kinase/NF-kappaB signaling`GO:0032691^biological_process^negative regulation of interleukin-1 beta production`GO:0032695^biological_process^negative regulation of interleukin-12 production`…	.
c4543_g1_i1	11.6495	2.16943465257792e-27	2.19153878120474e-23	c4543_g1	.	.	.	.	.	.	.	.
c27061_g3_i1	11.9218	6.60407563298253e-36	8.57746777605533e-32	c27061_g3	.	.	.	.	.	.	.	.
c24339_g1_i1	2.52297	3.17958709674761e-05	0.0283410313799022	c24339_g1	LEA29_GOSHI^LEA29_GOSHI^Q:1129-1004,H:254-295^71.429%ID^E:2.21e-08^RecName: Full=Late embryogenesis abundant protein D-29;^Eukaryota; Viridiplantae; Streptophyta; Embryophyta; Tracheophyta; Spermatophyta; Magnoliophyta; eudicotyledons; Gunneridae; Pentapetalae; rosids; malvids; Malvales; Malvaceae; Malvoideae; Gossypium	Gene.22992::c24339_g1_i1::g.22992::m.22992	1834-935[-]	PF01442.15^Apolipoprotein^Apolipoprotein A1/A4/E domain^34-222^E:0.024`PF01442.15^Apolipoprotein^Apolipoprotein A1/A4/E domain^174-292^E:23	.	.	.	GO:0008289^molecular_function^lipid binding`GO:0006869^biological_process^lipid transport`GO:0042157^biological_process^lipoprotein metabolic process`GO:0005576^cellular_component^extracellular region
c26288_g1_i2	3.96777	1.62715861619164e-05	0.0154100395737807	c26288_g1	MYSA_DROME^MYSA_DROME^Q:61-5949,H:1-1960^85.802%ID^E:0^RecName: Full=Myosin heavy chain, muscle;^Eukaryota; Metazoa; Ecdysozoa; Arthropoda; Hexapoda; Insecta; Pterygota; Neoptera; Endopterygota; Diptera; Brachycera; Muscomorpha; Ephydroidea; Drosophilidae; Drosophila; Sophophora	Gene.34380::c26288_g1_i2::g.34380::m.34380	61-5955[+]	PF02736.16^Myosin_N^Myosin N-terminal SH3-like domain^36-75^E:7.5e-13`PF00063.18^Myosin_head^Myosin head (motor domain)^90-768^E:6.3e-280`PF00612.24^IQ^IQ calmodulin-binding motif^786-804^E:0.0016`PF01576.16^Myosin_tail_1^Myosin tail^845-1925^E:6.1e-173	COG5022^myosin heavy chain	.	GO:0031672^cellular_component^A band`GO:0016459^cellular_component^myosin complex`GO:0032982^cellular_component^myosin filament`GO:0005703^cellular_component^polytene chromosome puff`GO:0030017^cellular_component^sarcomere`GO:0030898^molecular_function^actin-dependent ATPase activity`GO:0005524^molecular_function^ATP binding`GO:0042623^molecular_function^ATPase activity, coupled`GO:0003774^molecu…	GO:0003774^molecular_function^motor activity`GO:0005524^molecular_function^ATP binding`GO:0016459^cellular_component^myosin complex`GO:0005515^molecular_function^protein binding
c26850_g3_i2	4.23299	8.51619476572243e-06	0.00889961930477225	c26850_g3	PSME4_ARATH^PSME4_ARATH^Q:5080-2,H:1-1674^73.852%ID^E:0^RecName: Full=Proteasome activator subunit 4;^Eukaryota; Viridiplantae; Streptophyta; Embryophyta; Tracheophyta; Spermatophyta; Magnoliophyta; eudicotyledons; Gunneridae; Pentapetalae; rosids; malvids; Brassicales; Brassicaceae; Camelineae; Arabidopsis	Gene.38689::c26850_g3_i2::g.38689::m.38689	5080-1850[-]	PF16507.2^BLM10_mid^Proteasome-substrate-size regulator, mid region^310-507^E:1e-30`PF16507.2^BLM10_mid^Proteasome-substrate-size regulator, mid region^517-823^E:4.5e-22	ENOG410XP7J^Proteasome (Prosome, macropain) activator subunit 4	KEGG:ath:AT3G13330`KO:K06699	GO:0000502^cellular_component^proteasome complex`GO:0006281^biological_process^DNA repair	.
c30965_g1_i3	4.32193	1.41422912243034e-05	0.0135344704341052	c30965_g1	APRR5_ARATH^APRR5_ARATH^Q:2224-338,H:36-553^41.925%ID^E:5.86e-133^RecName: Full=Two-component response regulator-like APRR5;^Eukaryota; Viridiplantae; Streptophyta; Embryophyta; Tracheophyta; Spermatophyta; Magnoliophyta; eudicotyledons; Gunneridae; Pentapetalae; rosids; malvids; Brassicales; Brassicaceae; Camelineae; Arabidopsis	Gene.80116::c30965_g1_i3::g.80116::m.80116	2275-281[-]	PF00072.21^Response_reg^Response regulator receiver domain^34-145^E:3.3e-20`PF06203.11^CCT^CCT motif^602-644^E:6.8e-17	COG5641^Transcription factor	KEGG:ath:AT5G24470`KO:K12130	GO:0005634^cellular_component^nucleus`GO:0000160^biological_process^phosphorelay signal transduction system`GO:0006355^biological_process^regulation of transcription, DNA-templated`GO:0048511^biological_process^rhythmic process`GO:0006351^biological_process^transcription, DNA-templated	GO:0000160^biological_process^phosphorelay signal transduction system`GO:0005515^molecular_function^protein binding
c29508_g4_i1	4.34746	6.19157775663442e-06	0.00694962561604854	c29508_g4	YL154_YEAST^YL154_YEAST^Q:91-219,H:7-49^81.395%ID^E:5.48e-16^RecName: Full=Uncharacterized protein YLR154C-G;^Eukaryota; Fungi; Dikarya; Ascomycota; Saccharomycotina; Saccharomycetes; Saccharomycetales; Saccharomycetaceae; Saccharomyces	.	.	.	.	KEGG:sce:YLR154C-G	.	.
c30550_g1_i7	4.53787	5.30056288403044e-05	0.0430277924756603	c30550_g1	GBA2_MOUSE^GBA2_MOUSE^Q:2511-793,H:349-875^45.345%ID^E:3.18e-137^RecName: Full=Non-lysosomal glucosylceramidase;^Eukaryota; Metazoa; Chordata; Craniata; Vertebrata; Euteleostomi; Mammalia; Eutheria; Euarchontoglires; Glires; Rodentia; Sciurognathi; Muroidea; Muridae; Murinae; Mus; Mus`GBA2_MOUSE^GBA2_MOUSE^Q:2902-2639,H:233-323^42.857%ID^E:1.27e-14^RecName: Full=Non-lysosomal glucosylceramidase;^…	Gene.75155::c30550_g1_i7::g.75155::m.75155	2487-613[-]	PF12215.5^Glyco_hydr_116N^beta-glucosidase 2, glycosyl-hydrolase family 116 N-term^3-92^E:5.7e-22`PF04685.10^DUF608^Glycosyl-hydrolase family 116, catalytic region^206-567^E:1e-156	COG4354^Non-lysosomal glucosylceramidase that catalyzes the conversion of glucosylceramide to free glucose and ceramide (By similarity)	KEGG:mmu:230101`KO:K17108	GO:0005789^cellular_component^endoplasmic reticulum membrane`GO:0000139^cellular_component^Golgi membrane`GO:0016021^cellular_component^integral component of membrane`GO:0008422^molecular_function^beta-glucosidase activity`GO:0004348^molecular_function^glucosylceramidase activity`GO:0008206^biological_process^bile acid metabolic process`GO:0021954^biological_process^central nervous system neuron …	GO:0004348^molecular_function^glucosylceramidase activity`GO:0006665^biological_process^sphingolipid metabolic process`GO:0016021^cellular_component^integral component of membrane
c18835_g1_i2	4.62571	8.76946256539852e-07	0.00126554480644181	c18835_g1	VCL22_ARATH^VCL22_ARATH^Q:248-1087,H:86-372^49.481%ID^E:1.29e-134^RecName: Full=Vicilin-like seed storage protein At2g28490;^Eukaryota; Viridiplantae; Streptophyta; Embryophyta; Tracheophyta; Spermatophyta; Magnoliophyta; eudicotyledons; Gunneridae; Pentapetalae; rosids; malvids; Brassicales; Brassicaceae; Camelineae; Arabidopsis`VCL22_ARATH^VCL22_ARATH^Q:1161-1553,H:370-500^71.756%ID^E:1.29e-134…	Gene.6213::c18835_g1_i2::g.6213::m.6213	2-1114[+]	PF00190.19^Cupin_1^Cupin^86-233^E:1.1e-07	.	KEGG:ath:AT2G28490	GO:0009506^cellular_component^plasmodesma`GO:0045735^molecular_function^nutrient reservoir activity	GO:0045735^molecular_function^nutrient reservoir activity
c30708_g1_i11	5.04803	1.82502342337439e-07	0.000353033307623254	c30708_g1	TAR1_KLULA^TAR1_KLULA^Q:380-180,H:7-73^71.642%ID^E:5.22e-31^RecName: Full=Protein TAR1;^Eukaryota; Fungi; Dikarya; Ascomycota; Saccharomycotina; Saccharomycetes; Saccharomycetales; Saccharomycetaceae; Kluyveromyces`TAR1_KLULA^TAR1_KLULA^Q:184-71,H:72-109^76.316%ID^E:5.22e-31^RecName: Full=Protein TAR1;^Eukaryota; Fungi; Dikarya; Ascomycota; Saccharomycotina; Saccharomycetes; Saccharomycetales; Sa…	.	.	.	ENOG410Y21X^NA	KEGG:kla:KLLA0D17600g`KEGG:kla:KLLA0D17732g`KEGG:kla:KLLA0D17864g	GO:0005739^cellular_component^mitochondrion	.
c28810_g1_i1	5.26053	1.64134893212202e-07	0.000324405480134212	c28810_g1	.	Gene.56311::c28810_g1_i1::g.56311::m.56311	2-568[+]	PF06884.8^DUF1264^Protein of unknown function (DUF1264)^101-182^E:7.7e-36	.	.	.	.
c31473_g3_i6	5.48454	3.53635649946138e-16	2.67929103217942e-12	c31473_g3	ART2_YEAST^ART2_YEAST^Q:255-410,H:2-53^76.923%ID^E:2.09e-16^RecName: Full=Putative uncharacterized protein ART2;^Eukaryota; Fungi; Dikarya; Ascomycota; Saccharomycotina; Saccharomycetes; Saccharomycetales; Saccharomycetaceae; Saccharomyces	Gene.85839::c31473_g3_i6::g.85839::m.85839	105-437[+]	.	.	.	.	.
c31473_g3_i1	6.45121	8.26865831939706e-08	0.000174828281028982	c31473_g3	YL162_YEAST^YL162_YEAST^Q:12-188,H:60-118^76.271%ID^E:4.92e-22^RecName: Full=Protein YLR162W;^Eukaryota; Fungi; Dikarya; Ascomycota; Saccharomycotina; Saccharomycetes; Saccharomycetales; Saccharomycetaceae; Saccharomyces	.	.	.	.	KEGG:sce:YLR162W	GO:0016021^cellular_component^integral component of membrane	.
c30708_g1_i1	6.81778	2.1601658896579e-09	6.33534845774281e-06	c30708_g1	TAR1_KLULA^TAR1_KLULA^Q:337-71,H:21-109^53.933%ID^E:2.92e-21^RecName: Full=Protein TAR1;^Eukaryota; Fungi; Dikarya; Ascomycota; Saccharomycotina; Saccharomycetes; Saccharomycetales; Saccharomycetaceae; Kluyveromyces	.	.	.	ENOG410Y21X^NA	KEGG:kla:KLLA0D17600g`KEGG:kla:KLLA0D17732g`KEGG:kla:KLLA0D17864g	GO:0005739^cellular_component^mitochondrion	.
c28093_g1_i3	6.94642	1.61524581436744e-08	3.6713325926211e-05	c28093_g1	BRM_ARATH^BRM_ARATH^Q:3689-6652,H:1013-1985^75.632%ID^E:0^RecName: Full=ATP-dependent helicase BRM;^Eukaryota; Viridiplantae; Streptophyta; Embryophyta; Tracheophyta; Spermatophyta; Magnoliophyta; eudicotyledons; Gunneridae; Pentapetalae; rosids; malvids; Brassicales; Brassicaceae; Camelineae; Arabidopsis`BRM_ARATH^BRM_ARATH^Q:624-3692,H:64-1062^59.962%ID^E:0^RecName: Full=ATP-dependent helicase …	Gene.49280::c28093_g1_i3::g.49280::m.49280	426-3608[+]	PF08880.8^QLQ^QLQ^480-513^E:6e-10`PF00176.20^SNF2_N^SNF2 family N-terminal domain^1013-1041^E:1.2e-06	COG0553^helicase	KEGG:ath:AT2G46020`KO:K11647	GO:0005829^cellular_component^cytosol`GO:0005634^cellular_component^nucleus`GO:0005524^molecular_function^ATP binding`GO:0003682^molecular_function^chromatin binding`GO:0003677^molecular_function^DNA binding`GO:0008094^molecular_function^DNA-dependent ATPase activity`GO:0004386^molecular_function^helicase activity`GO:0043044^biological_process^ATP-dependent chromatin remodeling`GO:0010199^biologi…	GO:0005524^molecular_function^ATP binding`GO:0006355^biological_process^regulation of transcription, DNA-templated`GO:0005634^cellular_component^nucleus
c12237_g1_i2	7.98726	3.98199675069991e-11	1.29296856636923e-07	c12237_g1	PT314_ARATH^PT314_ARATH^Q:60-1070,H:1-339^82.301%ID^E:6.53e-170^RecName: Full=Probable sugar phosphate/phosphate translocator At3g14410;^Eukaryota; Viridiplantae; Streptophyta; Embryophyta; Tracheophyta; Spermatophyta; Magnoliophyta; eudicotyledons; Gunneridae; Pentapetalae; rosids; malvids; Brassicales; Brassicaceae; Camelineae; Arabidopsis	Gene.2104::c12237_g1_i2::g.2104::m.2104	60-1073[+]	PF03151.13^TPT^Triose-phosphate Transporter family^17-304^E:1.3e-24	ENOG410XP1S^solute carrier family 35 member	KEGG:ath:AT3G14410	GO:0022626^cellular_component^cytosolic ribosome`GO:0016021^cellular_component^integral component of membrane`GO:0008643^biological_process^carbohydrate transport	.
c22798_g1_i3	9.06002	3.80715880310199e-12	1.50493676913749e-08	c22798_g1	BXL4_ARATH^BXL4_ARATH^Q:95-1432,H:4-452^79.111%ID^E:0^RecName: Full=Beta-D-xylosidase 4;^Eukaryota; Viridiplantae; Streptophyta; Embryophyta; Tracheophyta; Spermatophyta; Magnoliophyta; eudicotyledons; Gunneridae; Pentapetalae; rosids; malvids; Brassicales; Brassicaceae; Camelineae; Arabidopsis	Gene.16411::c22798_g1_i3::g.16411::m.16411	113-1444[+]	PF00933.18^Glyco_hydro_3^Glycosyl hydrolase family 3 N terminal domain^113-355^E:9.9e-38`PF01915.19^Glyco_hydro_3_C^Glycosyl hydrolase family 3 C-terminal domain^401-441^E:8.8e-07	COG1472^hydrolase family 3	KEGG:ath:AT5G64570`KO:K15920	GO:0048046^cellular_component^apoplast`GO:0005618^cellular_component^cell wall`GO:0009505^cellular_component^plant-type cell wall`GO:0005578^cellular_component^proteinaceous extracellular matrix`GO:0046556^molecular_function^alpha-L-arabinofuranosidase activity`GO:0009044^molecular_function^xylan 1,4-beta-xylosidase activity`GO:0031222^biological_process^arabinan catabolic process`GO:0009627^biol…	GO:0004553^molecular_function^hydrolase activity, hydrolyzing O-glycosyl compounds`GO:0005975^biological_process^carbohydrate metabolic process
c40853_g1_i1	9.20457	6.52538665049414e-13	3.12246620054198e-09	c40853_g1	.	.	.	.	.	.	.	.
c27061_g6_i1	9.38802	6.48129299379786e-14	3.273665083984e-10	c27061_g6	ART2_YEAST^ART2_YEAST^Q:81-236,H:4-55^59.615%ID^E:4.22e-11^RecName: Full=Putative uncharacterized protein ART2;^Eukaryota; Fungi; Dikarya; Ascomycota; Saccharomycotina; Saccharomycetes; Saccharomycetales; Saccharomycetaceae; Saccharomyces	Gene.40479::c27061_g6_i1::g.40479::m.40479	81-470[+]	.	.	.	.	.
c31618_g2_i5	9.88417	9.12650965494683e-17	7.54322616635274e-13	c31618_g2	.	.	.	.	.	.	.	.
c30837_g4_i2	Inf	5.71038190960783e-22	5.19170792075815e-18	c30837_g4	CNOT1_MOUSE^CNOT1_MOUSE^Q:5698-3452,H:1620-2369^43.439%ID^E:7.53e-177^RecName: Full=CCR4-NOT transcription complex subunit 1;^Eukaryota; Metazoa; Chordata; Craniata; Vertebrata; Euteleostomi; Mammalia; Eutheria; Euarchontoglires; Glires; Rodentia; Sciurognathi; Muroidea; Muridae; Murinae; Mus; Mus`CNOT1_MOUSE^CNOT1_MOUSE^Q:7657-6179,H:1127-1576^34.8%ID^E:2.61e-79^RecName: Full=CCR4-NOT transcript…	Gene.78599::c30837_g4_i2::g.78599::m.78599	7657-3419[-]	PF16415.2^CNOT1_CAF1_bind^CCR4-NOT transcription complex subunit 1 CAF1-binding domain^1-181^E:6e-77`PF12842.4^DUF3819^Domain of unknown function (DUF3819)^308-449^E:2.9e-53`PF04054.12^Not1^CCR4-Not complex component, Not1^1019-1389^E:1.3e-152	COG5103^Ccr4-NOT transcription complex, subunit	KEGG:hsa:23019`KO:K12604	GO:0030014^cellular_component^CCR4-NOT complex`GO:0030015^cellular_component^CCR4-NOT core complex`GO:0005737^cellular_component^cytoplasm`GO:0000932^cellular_component^cytoplasmic mRNA processing body`GO:0005829^cellular_component^cytosol`GO:0005615^cellular_component^extracellular space`GO:0043231^cellular_component^intracellular membrane-bounded organelle`GO:0016020^cellular_component^membrane…	.
c29377_g1_i3	Inf	1.2966082813153e-14	7.36773344452143e-11	c29377_g1	RL10_VITRI^RL10_VITRI^Q:35-544,H:1-170^97.059%ID^E:3.04e-121^RecName: Full=60S ribosomal protein L10;^Eukaryota; Viridiplantae; Streptophyta; Embryophyta; Tracheophyta; Spermatophyta; Magnoliophyta; eudicotyledons; Gunneridae; Pentapetalae; rosids; Vitales; Vitaceae; Vitis	Gene.62558::c29377_g1_i3::g.62558::m.62558	35-544[+]	PF00252.15^Ribosomal_L16^Ribosomal protein L16p/L10e^12-166^E:3.4e-42	.	.	GO:0005840^cellular_component^ribosome`GO:0003735^molecular_function^structural constituent of ribosome`GO:0006412^biological_process^translation	GO:0003735^molecular_function^structural constituent of ribosome`GO:0006412^biological_process^translation`GO:0005840^cellular_component^ribosome
c31253_g2_i4	Inf	3.01300623906794e-14	1.61137346021965e-10	c31253_g2	.	Gene.83061::c31253_g2_i4::g.83061::m.83061	249-1856[+]	.	.	.	.	.
c17966_g1_i1	Inf	1.26448049785832e-12	5.74813867118924e-09	c17966_g1	RDRP_TCV^RDRP_TCV^Q:1294-2130,H:350-633^33.445%ID^E:1.05e-23^RecName: Full=RNA-directed RNA polymerase;^Viruses; ssRNA viruses; ssRNA positive-strand viruses, no DNA stage; Tombusviridae; Carmovirus	Gene.5053::c17966_g1_i1::g.5053::m.5053	1090-2514[+]	PF00998.20^RdRP_3^Viral RNA dependent RNA polymerase^42-347^E:8e-43`PF02123.13^RdRP_4^Viral RNA-directed RNA-polymerase^93-332^E:2.7e-11`PF00978.18^RdRP_2^RNA dependent RNA polymerase^116-359^E:1.2e-10`PF00680.17^RdRP_1^RNA dependent RNA polymerase^174-308^E:0.00021	.	KEGG:vg:944391`KEGG:vg:944392	GO:0000166^molecular_function^nucleotide binding`GO:0003723^molecular_function^RNA binding`GO:0003968^molecular_function^RNA-directed RNA polymerase activity`GO:0039694^biological_process^viral RNA genome replication	GO:0003723^molecular_function^RNA binding`GO:0003968^molecular_function^RNA-directed RNA polymerase activity`GO:0039694^biological_process^viral RNA genome replication`GO:0006351^biological_process^transcription, DNA-templated
c30207_g1_i12	Inf	3.05328941248617e-12	1.26179960688639e-08	c30207_g1	BCHC2_ARATH^BCHC2_ARATH^Q:459-9194,H:26-3001^70.857%ID^E:0^RecName: Full=BEACH domain-containing protein C2 {ECO:0000303|PubMed:25618824};^Eukaryota; Viridiplantae; Streptophyta; Embryophyta; Tracheophyta; Spermatophyta; Magnoliophyta; eudicotyledons; Gunneridae; Pentapetalae; rosids; malvids; Brassicales; Brassicaceae; Camelineae; Arabidopsis	Gene.71306::c30207_g1_i12::g.71306::m.71306	300-9227[+]	PF15787.2^DUF4704^Domain of unknown function (DUF4704)^669-949^E:2.1e-47`PF14844.3^PH_BEACH^PH domain associated with Beige/BEACH^2117-2210^E:2.7e-26`PF02138.15^Beach^Beige/BEACH domain^2238-2513^E:1.8e-120`PF00400.29^WD40^WD domain, G-beta repeat^2670-2700^E:5.3e-07	ENOG410XNQC^beige BEACH domain containing protein	KEGG:ath:AT2G45540	.	GO:0005515^molecular_function^protein binding
c25778_g1_i1	Inf	6.32145572813933e-12	2.29891116174098e-08	c25778_g1	PHSD_ARATH^PHSD_ARATH^Q:1908-511,H:4-465^77.302%ID^E:0^RecName: Full=Probable polyamine transporter At3g19553;^Eukaryota; Viridiplantae; Streptophyta; Embryophyta; Tracheophyta; Spermatophyta; Magnoliophyta; eudicotyledons; Gunneridae; Pentapetalae; rosids; malvids; Brassicales; Brassicaceae; Camelineae; Arabidopsis	Gene.31030::c25778_g1_i1::g.31030::m.31030	1914-400[-]	PF13520.3^AA_permease_2^Amino acid permease^34-407^E:2.3e-32`PF00324.18^AA_permease^Amino acid permease^47-178^E:2.3e-05`PF00324.18^AA_permease^Amino acid permease^220-417^E:3e-10	COG0531^amino acid	KEGG:ath:AT3G19553	GO:0016021^cellular_component^integral component of membrane`GO:0005886^cellular_component^plasma membrane`GO:0015171^molecular_function^amino acid transmembrane transporter activity`GO:0015297^molecular_function^antiporter activity`GO:0015203^molecular_function^polyamine transmembrane transporter activity`GO:0015293^molecular_function^symporter activity`GO:1902047^biological_process^polyamine tr…	GO:0015171^molecular_function^amino acid transmembrane transporter activity`GO:0003333^biological_process^amino acid transmembrane transport`GO:0016020^cellular_component^membrane`GO:0006810^biological_process^transport`GO:0055085^biological_process^transmembrane transport
c28704_g3_i4	Inf	2.4511737212748e-10	7.68459866266005e-07	c28704_g3	FH1_ARATH^FH1_ARATH^Q:1062-658,H:560-699^64.085%ID^E:2.21e-41^RecName: Full=Formin-like protein 1;^Eukaryota; Viridiplantae; Streptophyta; Embryophyta; Tracheophyta; Spermatophyta; Magnoliophyta; eudicotyledons; Gunneridae; Pentapetalae; rosids; malvids; Brassicales; Brassicaceae; Camelineae; Arabidopsis	Gene.55095::c28704_g3_i4::g.55095::m.55095	2391-613[-]	PF02181.20^FH2^Formin Homology 2 Domain^471-575^E:2.8e-28	ENOG410XQWC^Formin 2	KEGG:ath:AT3G25500	GO:0005618^cellular_component^cell wall`GO:0016021^cellular_component^integral component of membrane`GO:0016020^cellular_component^membrane`GO:0005886^cellular_component^plasma membrane`GO:0003779^molecular_function^actin binding`GO:0051015^molecular_function^actin filament binding`GO:0030036^biological_process^actin cytoskeleton organization`GO:0045010^biological_process^actin nucleation`GO:0051…	.
c7172_g1_i1	Inf	2.58473640055664e-10	7.83321597764692e-07	c7172_g1	.	.	.	.	.	.	.	.
c30056_g5_i7	Inf	2.36197409477108e-09	6.71073746169694e-06	c30056_g5	.	Gene.69588::c30056_g5_i7::g.69588::m.69588	2549-4543[+]	.	.	.	.	.
c20908_g1_i3	Inf	7.6651898542867e-09	1.99113161709195e-05	c20908_g1	ING1_ARATH^ING1_ARATH^Q:1191-481,H:1-234^71.13%ID^E:1.07e-99^RecName: Full=PHD finger protein ING1;^Eukaryota; Viridiplantae; Streptophyta; Embryophyta; Tracheophyta; Spermatophyta; Magnoliophyta; eudicotyledons; Gunneridae; Pentapetalae; rosids; malvids; Brassicales; Brassicaceae; Camelineae; Arabidopsis	Gene.10364::c20908_g1_i3::g.10364::m.10364	1191-478[-]	PF12998.4^ING^Inhibitor of growth proteins N-terminal histone-binding^3-111^E:1.9e-20	COG5034^Inhibitor of growth family member	KEGG:ath:AT3G24010`KO:K11346	GO:0005634^cellular_component^nucleus`GO:0035064^molecular_function^methylated histone binding`GO:0008270^molecular_function^zinc ion binding`GO:0016568^biological_process^chromatin modification`GO:0040008^biological_process^regulation of growth`GO:0006355^biological_process^regulation of transcription, DNA-templated`GO:0006351^biological_process^transcription, DNA-templated	.
c30055_g2_i4	Inf	1.24527128975851e-08	2.97937710134144e-05	c30055_g2	LEAD8_DAUCA^LEAD8_DAUCA^Q:2339-1665,H:171-409^50%ID^E:2.36e-28^RecName: Full=Embryonic protein DC-8;^Eukaryota; Viridiplantae; Streptophyta; Embryophyta; Tracheophyta; Spermatophyta; Magnoliophyta; eudicotyledons; Gunneridae; Pentapetalae; asterids; campanulids; Apiales; Apiaceae; Apioideae; Scandiceae; Daucinae; Daucus`LEAD8_DAUCA^LEAD8_DAUCA^Q:2375-1680,H:50-294^47.347%ID^E:2e-23^RecName: Full=…	Gene.69542::c30055_g2_i4::g.69542::m.69542	2531-1425[-]	PF01442.15^Apolipoprotein^Apolipoprotein A1/A4/E domain^81-202^E:0.091`PF01442.15^Apolipoprotein^Apolipoprotein A1/A4/E domain^145-308^E:0.00014`PF02987.13^LEA_4^Late embryogenesis abundant protein^151-193^E:3.4e-15`PF02987.13^LEA_4^Late embryogenesis abundant protein^184-227^E:3.4e-16`PF02987.13^LEA_4^Late embryogenesis abundant protein^228-271^E:1.1e-16`PF01442.15^Apolipoprotein^Apolipoprotein …	.	.	GO:0005618^cellular_component^cell wall`GO:0005737^cellular_component^cytoplasm`GO:0005576^cellular_component^extracellular region	GO:0008289^molecular_function^lipid binding`GO:0006869^biological_process^lipid transport`GO:0042157^biological_process^lipoprotein metabolic process`GO:0005576^cellular_component^extracellular region
c30663_g1_i1	Inf	2.17175857521752e-08	4.81584815568417e-05	c30663_g1	TRRAP_HUMAN^TRRAP_HUMAN^Q:351-7427,H:36-2378^27.652%ID^E:0^RecName: Full=Transformation/transcription domain-associated protein;^Eukaryota; Metazoa; Chordata; Craniata; Vertebrata; Euteleostomi; Mammalia; Eutheria; Euarchontoglires; Primates; Haplorrhini; Catarrhini; Hominidae; Homo`TRRAP_HUMAN^TRRAP_HUMAN^Q:7643-9934,H:2434-3274^30.562%ID^E:2e-100^RecName: Full=Transformation/transcription domai…	Gene.76520::c30663_g1_i1::g.76520::m.76520	288-7613[+]	.	COG5032^phosphatidylinositol kinase activity	KEGG:dme:Dmel_CG33554`KO:K08874	GO:0005737^cellular_component^cytoplasm`GO:0000123^cellular_component^histone acetyltransferase complex`GO:0005875^cellular_component^microtubule associated complex`GO:0035267^cellular_component^NuA4 histone acetyltransferase complex`GO:0005634^cellular_component^nucleus`GO:0005700^cellular_component^polytene chromosome`GO:0005703^cellular_component^polytene chromosome puff`GO:0000124^cellular_co…	.
c25831_g1_i3	Inf	5.62769632641002e-08	0.000121822206406719	c25831_g1	MSH6_ARATH^MSH6_ARATH^Q:1519-1677,H:122-174^43.396%ID^E:5.52e-06^RecName: Full=DNA mismatch repair protein MSH6;^Eukaryota; Viridiplantae; Streptophyta; Embryophyta; Tracheophyta; Spermatophyta; Magnoliophyta; eudicotyledons; Gunneridae; Pentapetalae; rosids; malvids; Brassicales; Brassicaceae; Camelineae; Arabidopsis	Gene.31336::c25831_g1_i3::g.31336::m.31336	172-2424[+]	.	COG0249^that it carries out the mismatch recognition step. This protein has a weak ATPase activity (By similarity)	.	GO:0032301^cellular_component^MutSalpha complex`GO:0005524^molecular_function^ATP binding`GO:0003684^molecular_function^damaged DNA binding`GO:0000400^molecular_function^four-way junction DNA binding`GO:0032137^molecular_function^guanine/thymine mispair binding`GO:0032138^molecular_function^single base insertion or deletion binding`GO:0043570^biological_process^maintenance of DNA repeat elements`…	.
c27516_g2_i6	Inf	2.25743705189904e-07	0.00041047880889501	c27516_g2	NT5D_DICDI^NT5D_DICDI^Q:1907-531,H:137-590^41.991%ID^E:1.17e-118^RecName: Full=5'-nucleotidase domain-containing protein DDB_G0275467;^Eukaryota; Amoebozoa; Mycetozoa; Dictyosteliida; Dictyostelium	Gene.44014::c27516_g2_i6::g.44014::m.44014	2159-504[-]	PF05761.11^5_nucleotid^5' nucleotidase family^96-541^E:1.8e-144	ENOG410XT8W^5-nucleotidase domain containing	KEGG:ddi:DDB_G0275467	GO:0008253^molecular_function^5'-nucleotidase activity`GO:0046872^molecular_function^metal ion binding`GO:0016311^biological_process^dephosphorylation	.
c21711_g1_i3	Inf	2.96430602040949e-07	0.000518280404726096	c21711_g1	HTH_ARATH^HTH_ARATH^Q:284-1342,H:32-385^76.271%ID^E:0^RecName: Full=Protein HOTHEAD;^Eukaryota; Viridiplantae; Streptophyta; Embryophyta; Tracheophyta; Spermatophyta; Magnoliophyta; eudicotyledons; Gunneridae; Pentapetalae; rosids; malvids; Brassicales; Brassicaceae; Camelineae; Arabidopsis`HTH_ARATH^HTH_ARATH^Q:1501-2112,H:391-594^68.627%ID^E:1.56e-91^RecName: Full=Protein HOTHEAD;^Eukaryota; Vi…	Gene.12603::c21711_g1_i3::g.12603::m.12603	188-1378[+]	PF00732.16^GMC_oxred_N^GMC oxidoreductase^63-335^E:1.5e-30	COG2303^oxidoreductase	.	GO:0005576^cellular_component^extracellular region`GO:0050660^molecular_function^flavin adenine dinucleotide binding`GO:0046593^molecular_function^mandelonitrile lyase activity`GO:0016614^molecular_function^oxidoreductase activity, acting on CH-OH group of donors`GO:0007267^biological_process^cell-cell signaling`GO:0009553^biological_process^embryo sac development`GO:0010430^biological_process^fa…	GO:0016614^molecular_function^oxidoreductase activity, acting on CH-OH group of donors`GO:0050660^molecular_function^flavin adenine dinucleotide binding`GO:0055114^biological_process^oxidation-reduction process
c30582_g2_i3	Inf	2.96430602040949e-07	0.000518280404726096	c30582_g2	UBP54_MOUSE^UBP54_MOUSE^Q:1673-702,H:32-344^32.153%ID^E:1.25e-35^RecName: Full=Inactive ubiquitin carboxyl-terminal hydrolase 54;^Eukaryota; Metazoa; Chordata; Craniata; Vertebrata; Euteleostomi; Mammalia; Eutheria; Euarchontoglires; Glires; Rodentia; Sciurognathi; Muroidea; Muridae; Murinae; Mus; Mus	Gene.75530::c30582_g2_i3::g.75530::m.75530	5570-621[-]	PF04781.9^DUF627^Protein of unknown function (DUF627)^61-172^E:2.4e-33`PF04780.9^DUF629^Protein of unknown function (DUF629)^332-863^E:8.9e-194`PF00443.26^UCH^Ubiquitin carboxyl-terminal hydrolase^1299-1606^E:2.6e-23	ENOG410XSNE^Ubiquitin specific peptidase	KEGG:mmu:78787	GO:0036459^molecular_function^thiol-dependent ubiquitinyl hydrolase activity`GO:0016579^biological_process^protein deubiquitination	GO:0036459^molecular_function^thiol-dependent ubiquitinyl hydrolase activity`GO:0016579^biological_process^protein deubiquitination
c30691_g3_i13	Inf	4.48237131040703e-07	0.000727720986479064	c30691_g3	MON2_DROME^MON2_DROME^Q:4243-2387,H:540-1147^28.464%ID^E:4.31e-67^RecName: Full=Protein MON2 homolog;^Eukaryota; Metazoa; Ecdysozoa; Arthropoda; Hexapoda; Insecta; Pterygota; Neoptera; Endopterygota; Diptera; Brachycera; Muscomorpha; Ephydroidea; Drosophilidae; Drosophila; Sophophora`MON2_DROME^MON2_DROME^Q:5871-4696,H:21-400^27.317%ID^E:6.91e-30^RecName: Full=Protein MON2 homolog;^Eukaryota; Met…	Gene.76845::c30691_g3_i13::g.76845::m.76845	3781-833[-]	PF09324.7^DUF1981^Domain of unknown function (DUF1981)^124-192^E:1.1e-09`PF16206.2^Mon2_C^C-terminal region of Mon2 protein^198-462^E:7.2e-49`PF16206.2^Mon2_C^C-terminal region of Mon2 protein^648-909^E:1.9e-16	ENOG410XQA8^MON2 homolog (S. cerevisiae)	KEGG:dme:Dmel_CG8683	GO:0005768^cellular_component^endosome`GO:0005794^cellular_component^Golgi apparatus`GO:0005519^molecular_function^cytoskeletal regulatory protein binding`GO:0031532^biological_process^actin cytoskeleton reorganization`GO:0007318^biological_process^pole plasm protein localization`GO:0015031^biological_process^protein transport	.
c28665_g1_i2	Inf	4.48237131040703e-07	0.000727720986479064	c28665_g1	GSTUH_ARATH^GSTUH_ARATH^Q:527-1180,H:1-219^73.059%ID^E:1.23e-102^RecName: Full=Glutathione S-transferase U17;^Eukaryota; Viridiplantae; Streptophyta; Embryophyta; Tracheophyta; Spermatophyta; Magnoliophyta; eudicotyledons; Gunneridae; Pentapetalae; rosids; malvids; Brassicales; Brassicaceae; Camelineae; Arabidopsis	Gene.54731::c28665_g1_i2::g.54731::m.54731	527-1216[+]	PF02798.17^GST_N^Glutathione S-transferase, N-terminal domain^5-77^E:2.1e-16`PF13417.3^GST_N_3^Glutathione S-transferase, N-terminal domain^11-80^E:1.1e-15`PF13409.3^GST_N_2^Glutathione S-transferase, N-terminal domain^14-77^E:2e-07`PF00043.22^GST_C^Glutathione S-transferase, C-terminal domain^99-201^E:1.9e-07`PF13410.3^GST_C_2^Glutathione S-transferase, C-terminal domain^121-193^E:6.8e-08	ENOG410XSIX^glutathione Stransferase	KEGG:ath:AT1G10370`KO:K00799	GO:0009507^cellular_component^chloroplast`GO:0005737^cellular_component^cytoplasm`GO:0005829^cellular_component^cytosol`GO:0004364^molecular_function^glutathione transferase activity`GO:0009704^biological_process^de-etiolation`GO:0006749^biological_process^glutathione metabolic process`GO:0048527^biological_process^lateral root development`GO:0080148^biological_process^negative regulation of resp…	GO:0005515^molecular_function^protein binding
c31176_g2_i7	Inf	4.80496381575489e-07	0.000766408588135066	c31176_g2	DPOE1_ARATH^DPOE1_ARATH^Q:4873-713,H:822-2156^64.245%ID^E:0^RecName: Full=DNA polymerase epsilon catalytic subunit A;^Eukaryota; Viridiplantae; Streptophyta; Embryophyta; Tracheophyta; Spermatophyta; Magnoliophyta; eudicotyledons; Gunneridae; Pentapetalae; rosids; malvids; Brassicales; Brassicaceae; Camelineae; Arabidopsis`DPOE1_ARATH^DPOE1_ARATH^Q:7325-4863,H:4-825^84.672%ID^E:0^RecName: Full=DN…	Gene.82369::c31176_g2_i7::g.82369::m.82369	4885-701[-]	PF00136.18^DNA_pol_B^DNA polymerase family B^59-255^E:1.7e-05`PF08490.9^DUF1744^Domain of unknown function (DUF1744)^713-1080^E:5.6e-122	COG0417^DNA polymerase	KEGG:ath:AT1G08260`KO:K02324	GO:0008622^cellular_component^epsilon DNA polymerase complex`GO:0008408^molecular_function^3'-5' exonuclease activity`GO:0051539^molecular_function^4 iron, 4 sulfur cluster binding`GO:0003677^molecular_function^DNA binding`GO:0003887^molecular_function^DNA-directed DNA polymerase activity`GO:0000166^molecular_function^nucleotide binding`GO:0008270^molecular_function^zinc ion binding`GO:0006260^bi…	GO:0000166^molecular_function^nucleotide binding`GO:0003677^molecular_function^DNA binding`GO:0003887^molecular_function^DNA-directed DNA polymerase activity`GO:0008270^molecular_function^zinc ion binding`GO:0006260^biological_process^DNA replication`GO:0005634^cellular_component^nucleus
c31535_g2_i5	Inf	8.42924951877392e-07	0.00123606786854576	c31535_g2	.	Gene.86402::c31535_g2_i5::g.86402::m.86402	1379-993[-]	.	.	.	.	.
c31336_g1_i8	Inf	8.42924951877392e-07	0.00123606786854576	c31336_g1	VP13A_DICDI^VP13A_DICDI^Q:2785-890,H:2511-3196^19.08%ID^E:8.44e-11^RecName: Full=Putative vacuolar protein sorting-associated protein 13A;^Eukaryota; Amoebozoa; Mycetozoa; Dictyosteliida; Dictyostelium	Gene.84178::c31336_g1_i8::g.84178::m.84178	9653-2835[-]	.	.	.	.	.
c31248_g1_i6	Inf	1.20442816740998e-06	0.00171098430775645	c31248_g1	BGAL1_ARATH^BGAL1_ARATH^Q:2345-507,H:235-847^82.708%ID^E:0^RecName: Full=Beta-galactosidase 1;^Eukaryota; Viridiplantae; Streptophyta; Embryophyta; Tracheophyta; Spermatophyta; Magnoliophyta; eudicotyledons; Gunneridae; Pentapetalae; rosids; malvids; Brassicales; Brassicaceae; Camelineae; Arabidopsis	Gene.83034::c31248_g1_i6::g.83034::m.83034	2366-504[-]	PF01301.16^Glyco_hydro_35^Glycosyl hydrolases family 35^7-118^E:4.2e-35`PF02140.15^Gal_Lectin^Galactose binding lectin domain^542-619^E:4.4e-20	COG1874^beta-galactosidase	KEGG:ath:AT3G13750	GO:0048046^cellular_component^apoplast`GO:0005618^cellular_component^cell wall`GO:0009505^cellular_component^plant-type cell wall`GO:0009506^cellular_component^plasmodesma`GO:0004565^molecular_function^beta-galactosidase activity`GO:0030246^molecular_function^carbohydrate binding`GO:0005975^biological_process^carbohydrate metabolic process	GO:0030246^molecular_function^carbohydrate binding
c29773_g1_i1	Inf	1.39095191316472e-06	0.00191607841044238	c29773_g1	.	Gene.66590::c29773_g1_i1::g.66590::m.66590	2557-413[-]	.	.	.	.	.
c27917_g1_i3	Inf	1.85910899921596e-06	0.00244963207074953	c27917_g1	SSG1_ANTMA^SSG1_ANTMA^Q:692-2530,H:1-608^76.098%ID^E:0^RecName: Full=Granule-bound starch synthase 1, chloroplastic/amyloplastic;^Eukaryota; Viridiplantae; Streptophyta; Embryophyta; Tracheophyta; Spermatophyta; Magnoliophyta; eudicotyledons; Gunneridae; Pentapetalae; asterids; lamiids; Lamiales; Plantaginaceae; Antirrhineae; Antirrhinum	Gene.47625::c27917_g1_i3::g.47625::m.47625	692-2533[+]	PF08323.8^Glyco_transf_5^Starch synthase catalytic domain^88-349^E:7.1e-77`PF00534.17^Glycos_transf_1^Glycosyl transferases group 1^405-527^E:2.8e-14`PF13692.3^Glyco_trans_1_4^Glycosyl transferases group 1^405-526^E:1.4e-09	.	.	GO:0009501^cellular_component^amyloplast`GO:0009507^cellular_component^chloroplast`GO:0033201^molecular_function^alpha-1,4-glucan synthase activity`GO:0004373^molecular_function^glycogen (starch) synthase activity`GO:0009011^molecular_function^starch synthase activity`GO:0019252^biological_process^starch biosynthetic process	.
c29854_g1_i7	Inf	2.49204310508468e-06	0.00319111384485893	c29854_g1	CRWN1_ARATH^CRWN1_ARATH^Q:141-3545,H:62-1132^41.747%ID^E:0^RecName: Full=Protein CROWDED NUCLEI 1 {ECO:0000303|PubMed:24308514};^Eukaryota; Viridiplantae; Streptophyta; Embryophyta; Tracheophyta; Spermatophyta; Magnoliophyta; eudicotyledons; Gunneridae; Pentapetalae; rosids; malvids; Brassicales; Brassicaceae; Camelineae; Arabidopsis	Gene.67452::c29854_g1_i7::g.67452::m.67452	165-3548[+]	.	ENOG4111KVI^Nuclear matrix constituent protein	KEGG:ath:AT1G67230	GO:0000789^cellular_component^cytoplasmic chromatin`GO:0005829^cellular_component^cytosol`GO:0005635^cellular_component^nuclear envelope`GO:0005652^cellular_component^nuclear lamina`GO:0031965^cellular_component^nuclear membrane`GO:0034399^cellular_component^nuclear periphery`GO:0005654^cellular_component^nucleoplasm`GO:0005634^cellular_component^nucleus`GO:0006997^biological_process^nucleus orga…	.
c19899_g1_i2	Inf	2.6826702075817e-06	0.00338750454531535	c19899_g1	RRP2_SPIOL^RRP2_SPIOL^Q:309-839,H:84-260^81.356%ID^E:2.21e-84^RecName: Full=30S ribosomal protein 2, chloroplastic;^Eukaryota; Viridiplantae; Streptophyta; Embryophyta; Tracheophyta; Spermatophyta; Magnoliophyta; eudicotyledons; Gunneridae; Pentapetalae; Caryophyllales; Amaranthaceae; Chenopodioideae; Anserineae; Spinacia	Gene.7933::c19899_g1_i2::g.7933::m.7933	93-842[+]	PF00076.19^RRM_1^RNA recognition motif. (a.k.a. RRM, RBD, or RNP domain)^75-145^E:5.8e-23`PF13893.3^RRM_5^RNA recognition motif. (a.k.a. RRM, RBD, or RNP domain)^83-149^E:0.13`PF00076.19^RRM_1^RNA recognition motif. (a.k.a. RRM, RBD, or RNP domain)^175-245^E:5e-19`PF13893.3^RRM_5^RNA recognition motif. (a.k.a. RRM, RBD, or RNP domain)^182-246^E:0.022	.	.	GO:0009507^cellular_component^chloroplast`GO:0005840^cellular_component^ribosome`GO:0000166^molecular_function^nucleotide binding`GO:0019843^molecular_function^rRNA binding	GO:0003676^molecular_function^nucleic acid binding
c30020_g1_i5	Inf	3.1105129075423e-06	0.00387395208239758	c30020_g1	ZTP50_ARATH^ZTP50_ARATH^Q:525-2255,H:46-619^77.855%ID^E:0^RecName: Full=Putative zinc transporter At3g08650;^Eukaryota; Viridiplantae; Streptophyta; Embryophyta; Tracheophyta; Spermatophyta; Magnoliophyta; eudicotyledons; Gunneridae; Pentapetalae; rosids; malvids; Brassicales; Brassicaceae; Camelineae; Arabidopsis	Gene.69226::c30020_g1_i5::g.69226::m.69226	468-2258[+]	PF02535.19^Zip^ZIP Zinc transporter^173-298^E:3.3e-11	COG0428^zinc transporter	KEGG:ath:AT3G08650	GO:0016021^cellular_component^integral component of membrane`GO:0046873^molecular_function^metal ion transmembrane transporter activity`GO:0006829^biological_process^zinc II ion transport	GO:0046873^molecular_function^metal ion transmembrane transporter activity`GO:0030001^biological_process^metal ion transport`GO:0055085^biological_process^transmembrane transport`GO:0016020^cellular_component^membrane
c31142_g1_i6	Inf	3.35031529177514e-06	0.00406134153843094	c31142_g1	AB26B_ARATH^AB26B_ARATH^Q:1636-560,H:340-698^66.295%ID^E:9.55e-158^RecName: Full=ABC transporter B family member 26, chloroplastic;^Eukaryota; Viridiplantae; Streptophyta; Embryophyta; Tracheophyta; Spermatophyta; Magnoliophyta; eudicotyledons; Gunneridae; Pentapetalae; rosids; malvids; Brassicales; Brassicaceae; Camelineae; Arabidopsis`AB26B_ARATH^AB26B_ARATH^Q:2565-1774,H:102-340^51.515%ID^E:2.…	Gene.81989::c31142_g1_i6::g.81989::m.81989	3454-5592[+]	PF04114.11^Gaa1^Gaa1-like, GPI transamidase component^150-704^E:8.6e-112	ENOG410XT16^glycosylphosphatidylinositol anchor attachment protein 1 homolog (yeast)	KEGG:mmu:14731`KO:K05289	GO:0042765^cellular_component^GPI-anchor transamidase complex`GO:0005887^cellular_component^integral component of plasma membrane`GO:0016020^cellular_component^membrane`GO:0034235^molecular_function^GPI anchor binding`GO:0003923^molecular_function^GPI-anchor transamidase activity`GO:0016255^biological_process^attachment of GPI anchor to protein`GO:0006506^biological_process^GPI anchor biosyntheti…	GO:0016021^cellular_component^integral component of membrane`GO:0042765^cellular_component^GPI-anchor transamidase complex
c27092_g1_i2	Inf	7.67930096061272e-06	0.00821387065218855	c27092_g1	HDA9_ARATH^HDA9_ARATH^Q:1231-26,H:1-402^88.308%ID^E:0^RecName: Full=Histone deacetylase 9;^Eukaryota; Viridiplantae; Streptophyta; Embryophyta; Tracheophyta; Spermatophyta; Magnoliophyta; eudicotyledons; Gunneridae; Pentapetalae; rosids; malvids; Brassicales; Brassicaceae; Camelineae; Arabidopsis	Gene.40682::c27092_g1_i2::g.40682::m.40682	1231-2[-]	PF00850.16^Hist_deacetyl^Histone deacetylase domain^24-315^E:2.3e-81	COG0123^Histone deacetylase	KEGG:ath:AT3G44680`KO:K06067	GO:0005634^cellular_component^nucleus`GO:0032041^molecular_function^NAD-dependent histone deacetylase activity (H3-K14 specific)`GO:0010187^biological_process^negative regulation of seed germination`GO:0006355^biological_process^regulation of transcription, DNA-templated`GO:0006351^biological_process^transcription, DNA-templated	.
c29015_g2_i10	Inf	1.04435797190586e-05	0.0105499881924184	c29015_g2	ALY3_ARATH^ALY3_ARATH^Q:3621-301,H:69-1132^49.779%ID^E:0^RecName: Full=Protein ALWAYS EARLY 3;^Eukaryota; Viridiplantae; Streptophyta; Embryophyta; Tracheophyta; Spermatophyta; Magnoliophyta; eudicotyledons; Gunneridae; Pentapetalae; rosids; malvids; Brassicales; Brassicaceae; Camelineae; Arabidopsis	Gene.58798::c29015_g2_i10::g.58798::m.58798	3588-295[-]	PF06584.10^DIRP^DIRP^561-661^E:2.8e-29	ENOG410YA1T^lin-9 homolog (C. elegans)	KEGG:ath:AT3G21430	GO:0005634^cellular_component^nucleus`GO:0017053^cellular_component^transcriptional repressor complex`GO:0003677^molecular_function^DNA binding`GO:0007049^biological_process^cell cycle`GO:0006351^biological_process^transcription, DNA-templated	GO:0006351^biological_process^transcription, DNA-templated`GO:0007049^biological_process^cell cycle`GO:0017053^cellular_component^transcriptional repressor complex
c27644_g1_i4	Inf	1.04435797190586e-05	0.0105499881924184	c27644_g1	GTE10_ARATH^GTE10_ARATH^Q:946-3198,H:1-717^51.436%ID^E:4.65e-155^RecName: Full=Transcription factor GTE10;^Eukaryota; Viridiplantae; Streptophyta; Embryophyta; Tracheophyta; Spermatophyta; Magnoliophyta; eudicotyledons; Gunneridae; Pentapetalae; rosids; malvids; Brassicales; Brassicaceae; Camelineae; Arabidopsis	Gene.45103::c27644_g1_i4::g.45103::m.45103	877-2628[+]	PF00439.22^Bromodomain^Bromodomain^209-293^E:1.4e-20`PF17035.2^BET^Bromodomain extra-terminal - transcription regulation^358-420^E:3.4e-14	COG5076^bromodomain	KEGG:ath:AT5G63320	GO:0005634^cellular_component^nucleus`GO:0009738^biological_process^abscisic acid-activated signaling pathway`GO:0051365^biological_process^cellular response to potassium ion starvation`GO:0045892^biological_process^negative regulation of transcription, DNA-templated`GO:0009737^biological_process^response to abscisic acid`GO:0009409^biological_process^response to cold`GO:0009651^biological_proces…	GO:0005515^molecular_function^protein binding
c30708_g2_i1	Inf	1.12835896165414e-05	0.0112732979908472	c30708_g2	.	.	.	.	.	.	.	.
c30946_g1_i1	Inf	1.31796804838358e-05	0.0127474150058394	c30946_g1	UBC24_ARATH^UBC24_ARATH^Q:1581-1,H:28-546^48.237%ID^E:3.52e-145^RecName: Full=Probable ubiquitin-conjugating enzyme E2 24;^Eukaryota; Viridiplantae; Streptophyta; Embryophyta; Tracheophyta; Spermatophyta; Magnoliophyta; eudicotyledons; Gunneridae; Pentapetalae; rosids; malvids; Brassicales; Brassicaceae; Camelineae; Arabidopsis	Gene.79902::c30946_g1_i1::g.79902::m.79902	1659-1[-]	.	ENOG410XQ7W^ubiquitin-conjugating enzyme	KEGG:ath:AT2G33770`KO:K10581	GO:0005783^cellular_component^endoplasmic reticulum`GO:0005794^cellular_component^Golgi apparatus`GO:0005524^molecular_function^ATP binding`GO:0061630^molecular_function^ubiquitin protein ligase activity`GO:0031625^molecular_function^ubiquitin protein ligase binding`GO:0044257^biological_process^cellular protein catabolic process`GO:0016036^biological_process^cellular response to phosphate starva…	.
c29153_g1_i4	Inf	2.11057007349072e-05	0.0197821339558305	c29153_g1	VPS8_MOUSE^VPS8_MOUSE^Q:2767-5688,H:468-1287^25.2%ID^E:1.15e-82^RecName: Full=Vacuolar protein sorting-associated protein 8 homolog;^Eukaryota; Metazoa; Chordata; Craniata; Vertebrata; Euteleostomi; Mammalia; Eutheria; Euarchontoglires; Glires; Rodentia; Sciurognathi; Muroidea; Muridae; Murinae; Mus; Mus	Gene.60213::c29153_g1_i4::g.60213::m.60213	361-6216[+]	PF00400.29^WD40^WD domain, G-beta repeat^484-513^E:6.1e-05`PF12816.4^Vps8^Golgi CORVET complex core vacuolar protein 8^965-1149^E:4.6e-55`PF00637.17^Clathrin^Region in Clathrin and VPS^1470-1545^E:1.1e-07	ENOG410XRX6^vacuolar protein sorting 8 homolog (S. cerevisiae)	KEGG:mmu:209018	GO:0033263^cellular_component^CORVET complex`GO:0005769^cellular_component^early endosome`GO:0008270^molecular_function^zinc ion binding`GO:0034058^biological_process^endosomal vesicle fusion	GO:0005515^molecular_function^protein binding`GO:0006886^biological_process^intracellular protein transport`GO:0016192^biological_process^vesicle-mediated transport
c31630_g3_i5	Inf	2.47333246040114e-05	0.0227139360911404	c31630_g3	THOC2_ARATH^THOC2_ARATH^Q:7613-2055,H:1-1784^69.661%ID^E:0^RecName: Full=THO complex subunit 2;^Eukaryota; Viridiplantae; Streptophyta; Embryophyta; Tracheophyta; Spermatophyta; Magnoliophyta; eudicotyledons; Gunneridae; Pentapetalae; rosids; malvids; Brassicales; Brassicaceae; Camelineae; Arabidopsis	Gene.87077::c31630_g3_i5::g.87077::m.87077	7616-1989[-]	PF16134.2^THOC2_N^THO complex subunit 2 N-terminus^38-414^E:1.1e-48`PF16134.2^THOC2_N^THO complex subunit 2 N-terminus^438-592^E:1.9e-23`PF11732.5^Thoc2^Transcription- and export-related complex subunit^594-669^E:5.5e-30`PF11262.5^Tho2^Transcription factor/nuclear export subunit protein 2^921-1215^E:1.8e-98	ENOG410XQ2A^tHO complex	KEGG:ath:AT1G24706`KO:K12879	GO:0000347^cellular_component^THO complex`GO:0000155^molecular_function^phosphorelay sensor kinase activity`GO:0003723^molecular_function^RNA binding`GO:0006397^biological_process^mRNA processing`GO:0051028^biological_process^mRNA transport`GO:0008380^biological_process^RNA splicing	.
c30830_g2_i7	Inf	4.0006311448994e-05	0.0343137152642282	c30830_g2	HUA2_ARATH^HUA2_ARATH^Q:9940-6641,H:17-1025^47.606%ID^E:0^RecName: Full=ENHANCER OF AG-4 protein 2;^Eukaryota; Viridiplantae; Streptophyta; Embryophyta; Tracheophyta; Spermatophyta; Magnoliophyta; eudicotyledons; Gunneridae; Pentapetalae; rosids; malvids; Brassicales; Brassicaceae; Camelineae; Arabidopsis`HUA2_ARATH^HUA2_ARATH^Q:6235-5759,H:1175-1330^41.509%ID^E:6.85e-25^RecName: Full=ENHANCER OF…	Gene.78455::c30830_g2_i7::g.78455::m.78455	9988-5621[-]	PF00855.14^PWWP^PWWP domain^19-103^E:5e-16`PF04818.10^CTD_bind^RNA polymerase II-binding domain.^918-984^E:4.4e-08	ENOG410ZJEY^RPR	KEGG:ath:AT5G23150	GO:0005634^cellular_component^nucleus`GO:0003700^molecular_function^transcription factor activity, sequence-specific DNA binding`GO:0030154^biological_process^cell differentiation`GO:0048497^biological_process^maintenance of floral organ identity`GO:0006397^biological_process^mRNA processing`GO:0009910^biological_process^negative regulation of flower development`GO:0048510^biological_process^regu…	.
c28543_g1_i4	Inf	4.33771447734385e-05	0.0368571950595019	c28543_g1	FZR2_ARATH^FZR2_ARATH^Q:204-1643,H:4-483^77.664%ID^E:0^RecName: Full=Protein FIZZY-RELATED 2;^Eukaryota; Viridiplantae; Streptophyta; Embryophyta; Tracheophyta; Spermatophyta; Magnoliophyta; eudicotyledons; Gunneridae; Pentapetalae; rosids; malvids; Brassicales; Brassicaceae; Camelineae; Arabidopsis	Gene.53379::c28543_g1_i4::g.53379::m.53379	201-1646[+]	PF12894.4^ANAPC4_WD40^Anaphase-promoting complex subunit 4 WD40 domain^206-266^E:0.00017`PF00400.29^WD40^WD domain, G-beta repeat^291-326^E:1.9e-05`PF00400.29^WD40^WD domain, G-beta repeat^331-371^E:0.022`PF00400.29^WD40^WD domain, G-beta repeat^420-456^E:5.7e-05	COG2319^wd repeat	KEGG:ath:AT4G22910`KO:K03364	GO:0005634^cellular_component^nucleus`GO:0051301^biological_process^cell division`GO:0016049^biological_process^cell growth`GO:0042023^biological_process^DNA endoreduplication`GO:0007067^biological_process^mitotic nuclear division`GO:0016567^biological_process^protein ubiquitination`GO:0010091^biological_process^trichome branching	GO:0005515^molecular_function^protein binding
c30158_g2_i2	Inf	4.70421652290249e-05	0.0392379131754794	c30158_g2	FOLD2_ARATH^FOLD2_ARATH^Q:1926-1033,H:2-299^81.879%ID^E:2.67e-173^RecName: Full=Bifunctional protein FolD 2;^Eukaryota; Viridiplantae; Streptophyta; Embryophyta; Tracheophyta; Spermatophyta; Magnoliophyta; eudicotyledons; Gunneridae; Pentapetalae; rosids; malvids; Brassicales; Brassicaceae; Camelineae; Arabidopsis	Gene.70778::c30158_g2_i2::g.70778::m.70778	1932-1030[-]	PF00763.20^THF_DHG_CYH^Tetrahydrofolate dehydrogenase/cyclohydrolase, catalytic domain^12-128^E:1.1e-39`PF02882.16^THF_DHG_CYH_C^Tetrahydrofolate dehydrogenase/cyclohydrolase, NAD(P)-binding domain^131-296^E:1.7e-67	COG0190^Catalyzes the oxidation of 5,10- methylenetetrahydrofolate to 5,10-methenyltetrahydrofolate and then the hydrolysis of 5,10-methenyltetrahydrofolate to 10- formyltetrahydrofolate (By similarity)	KEGG:ath:AT3G12290	GO:0009507^cellular_component^chloroplast`GO:0005829^cellular_component^cytosol`GO:0004477^molecular_function^methenyltetrahydrofolate cyclohydrolase activity`GO:0004488^molecular_function^methylenetetrahydrofolate dehydrogenase (NADP+) activity`GO:0009396^biological_process^folic acid-containing compound biosynthetic process`GO:0009853^biological_process^photorespiration`GO:0035999^biological_pr…	GO:0003824^molecular_function^catalytic activity`GO:0004488^molecular_function^methylenetetrahydrofolate dehydrogenase (NADP+) activity`GO:0009396^biological_process^folic acid-containing compound biosynthetic process`GO:0055114^biological_process^oxidation-reduction process
c30925_g1_i2	Inf	6.00805413626442e-05	0.0479152857812941	c30925_g1	DPE2_ARATH^DPE2_ARATH^Q:1789-2874,H:409-770^82.597%ID^E:0^RecName: Full=4-alpha-glucanotransferase DPE2;^Eukaryota; Viridiplantae; Streptophyta; Embryophyta; Tracheophyta; Spermatophyta; Magnoliophyta; eudicotyledons; Gunneridae; Pentapetalae; rosids; malvids; Brassicales; Brassicaceae; Camelineae; Arabidopsis`DPE2_ARATH^DPE2_ARATH^Q:500-1669,H:20-409^66.154%ID^E:0^RecName: Full=4-alpha-glucanotr…	Gene.79695::c30925_g1_i2::g.79695::m.79695	452-1678[+]	PF00686.16^CBM_20^Starch binding domain^17-107^E:1.7e-21`PF00686.16^CBM_20^Starch binding domain^160-248^E:8.8e-13`PF02446.14^Glyco_hydro_77^4-alpha-glucanotransferase^272-405^E:5.8e-29	COG1640^4-alpha-glucanotransferase	KEGG:ath:AT2G40840`KO:K00705	GO:0005829^cellular_component^cytosol`GO:0004134^molecular_function^4-alpha-glucanotransferase activity`GO:0010297^molecular_function^heteropolysaccharide binding`GO:2001070^molecular_function^starch binding`GO:0005977^biological_process^glycogen metabolic process`GO:0000025^biological_process^maltose catabolic process`GO:0000023^biological_process^maltose metabolic process`GO:0005976^biological_…	GO:2001070^molecular_function^starch binding`GO:0004134^molecular_function^4-alpha-glucanotransferase activity`GO:0005975^biological_process^carbohydrate metabolic process
c25158_g2_i2	-2.69656	2.47321616935719e-05	0.0227139360911404	c25158_g2	TBA_PRUDU^TBA_PRUDU^Q:1685-393,H:1-431^99.304%ID^E:0^RecName: Full=Tubulin alpha chain;^Eukaryota; Viridiplantae; Streptophyta; Embryophyta; Tracheophyta; Spermatophyta; Magnoliophyta; eudicotyledons; Gunneridae; Pentapetalae; rosids; fabids; Rosales; Rosaceae; Maloideae; Amygdaleae; Prunus	Gene.27538::c25158_g2_i2::g.27538::m.27538	1685-333[-]	PF00091.22^Tubulin^Tubulin/FtsZ family, GTPase domain^3-213^E:8.3e-67`PF03953.14^Tubulin_C^Tubulin C-terminal domain^263-391^E:1.3e-50	.	.	GO:0005737^cellular_component^cytoplasm`GO:0005874^cellular_component^microtubule`GO:0005525^molecular_function^GTP binding`GO:0003924^molecular_function^GTPase activity`GO:0005200^molecular_function^structural constituent of cytoskeleton`GO:0007017^biological_process^microtubule-based process	GO:0003924^molecular_function^GTPase activity
c30837_g4_i6	-2.83975	3.03983057245892e-05	0.0273635916986384	c30837_g4	CNOT1_XENTR^CNOT1_XENTR^Q:4618-3434,H:2006-2388^59.091%ID^E:1.32e-134^RecName: Full=CCR4-NOT transcription complex subunit 1;^Eukaryota; Metazoa; Chordata; Craniata; Vertebrata; Euteleostomi; Amphibia; Batrachia; Anura; Pipoidea; Pipidae; Xenopodinae; Xenopus; Silurana	Gene.78614::c30837_g4_i6::g.78614::m.78614	201-1565[+]	PF01553.18^Acyltransferase^Acyltransferase^116-261^E:2.3e-20	.	KEGG:mcc:574297`KO:K13511	GO:0016021^cellular_component^integral component of membrane`GO:0031224^cellular_component^intrinsic component of membrane`GO:0031966^cellular_component^mitochondrial membrane`GO:0008374^molecular_function^O-acyltransferase activity`GO:0035965^biological_process^cardiolipin acyl-chain remodeling`GO:0007507^biological_process^heart development`GO:0007007^biological_process^inner mitochondrial memb…	GO:0016746^molecular_function^transferase activity, transferring acyl groups`GO:0008152^biological_process^metabolic process
c26294_g1_i1	-2.89004	3.91018530810703e-05	0.034182915159343	c26294_g1	7OMT_PAPSO^7OMT_PAPSO^Q:1042-236,H:60-337^54.317%ID^E:8.52e-104^RecName: Full=(R,S)-reticuline 7-O-methyltransferase {ECO:0000303|PubMed:14675446};^Eukaryota; Viridiplantae; Streptophyta; Embryophyta; Tracheophyta; Spermatophyta; Magnoliophyta; eudicotyledons; Ranunculales; Papaveraceae; Papaveroideae; Papaver`7OMT_PAPSO^7OMT_PAPSO^Q:1229-1002,H:1-80^51.25%ID^E:1.77e-13^RecName: Full=(R,S)-reticu…	Gene.34478::c26294_g1_i1::g.34478::m.34478	898-179[-]	PF00891.15^Methyltransf_2^O-methyltransferase^4-223^E:2.1e-67	.	KEGG:ag:AAQ01668`KO:K13390	GO:0042802^molecular_function^identical protein binding`GO:0008171^molecular_function^O-methyltransferase activity`GO:0009821^biological_process^alkaloid biosynthetic process	GO:0008171^molecular_function^O-methyltransferase activity
c20908_g1_i5	-4.60881	3.20589707040353e-06	0.00393879113445781	c20908_g1	ING1_ARATH^ING1_ARATH^Q:1191-481,H:1-234^71.13%ID^E:1.11e-99^RecName: Full=PHD finger protein ING1;^Eukaryota; Viridiplantae; Streptophyta; Embryophyta; Tracheophyta; Spermatophyta; Magnoliophyta; eudicotyledons; Gunneridae; Pentapetalae; rosids; malvids; Brassicales; Brassicaceae; Camelineae; Arabidopsis	Gene.10366::c20908_g1_i5::g.10366::m.10366	1191-478[-]	PF12998.4^ING^Inhibitor of growth proteins N-terminal histone-binding^3-111^E:1.9e-20	COG5034^Inhibitor of growth family member	KEGG:ath:AT3G24010`KO:K11346	GO:0005634^cellular_component^nucleus`GO:0035064^molecular_function^methylated histone binding`GO:0008270^molecular_function^zinc ion binding`GO:0016568^biological_process^chromatin modification`GO:0040008^biological_process^regulation of growth`GO:0006355^biological_process^regulation of transcription, DNA-templated`GO:0006351^biological_process^transcription, DNA-templated	.
c31473_g3_i2	-5.17864	1.52594726251644e-07	0.000308298993924905	c31473_g3	.	.	.	.	.	.	.	.
c30545_g1_i5	-5.18383	7.2805529732504e-12	2.54586936411156e-08	c30545_g1	BGAL5_ARATH^BGAL5_ARATH^Q:2-1432,H:253-729^72.117%ID^E:0^RecName: Full=Beta-galactosidase 5;^Eukaryota; Viridiplantae; Streptophyta; Embryophyta; Tracheophyta; Spermatophyta; Magnoliophyta; eudicotyledons; Gunneridae; Pentapetalae; rosids; malvids; Brassicales; Brassicaceae; Camelineae; Arabidopsis	Gene.75120::c30545_g1_i5::g.75120::m.75120	2-1453[+]	PF01301.16^Glyco_hydro_35^Glycosyl hydrolases family 35^1-90^E:5.5e-33	COG1874^beta-galactosidase	KEGG:ath:AT4G36360	GO:0048046^cellular_component^apoplast`GO:0005618^cellular_component^cell wall`GO:0004565^molecular_function^beta-galactosidase activity`GO:0030246^molecular_function^carbohydrate binding`GO:0005975^biological_process^carbohydrate metabolic process	.
c19930_g1_i2	-5.31711	6.45393456448011e-06	0.00715576059510778	c19930_g1	CLE5_ARATH^CLE5_ARATH^Q:472-275,H:17-81^57.576%ID^E:3.98e-15^RecName: Full=CLAVATA3/ESR (CLE)-related protein 5;^Eukaryota; Viridiplantae; Streptophyta; Embryophyta; Tracheophyta; Spermatophyta; Magnoliophyta; eudicotyledons; Gunneridae; Pentapetalae; rosids; malvids; Brassicales; Brassicaceae; Camelineae; Arabidopsis	.	.	.	ENOG4111DS1^cell-cell signaling involved in cell fate commitment	KEGG:ath:AT2G31083	GO:0005615^cellular_component^extracellular space`GO:0033612^molecular_function^receptor serine/threonine kinase binding`GO:0045168^biological_process^cell-cell signaling involved in cell fate commitment`GO:0007275^biological_process^multicellular organism development	.
c30708_g1_i13	-5.34483	3.03468267068883e-11	1.0218675717445e-07	c30708_g1	TAR1_KLULA^TAR1_KLULA^Q:379-71,H:7-109^60.748%ID^E:4.86e-28^RecName: Full=Protein TAR1;^Eukaryota; Fungi; Dikarya; Ascomycota; Saccharomycotina; Saccharomycetes; Saccharomycetales; Saccharomycetaceae; Kluyveromyces	.	.	.	ENOG410Y21X^NA	KEGG:kla:KLLA0D17600g`KEGG:kla:KLLA0D17732g`KEGG:kla:KLLA0D17864g	GO:0005739^cellular_component^mitochondrion	.
c27880_g2_i1	-5.80047	3.99699390344689e-05	0.0343137152642282	c27880_g2	M030_ARATH^M030_ARATH^Q:185-3,H:1-61^95.082%ID^E:3.49e-38^RecName: Full=Uncharacterized mitochondrial protein AtMg00030;^Eukaryota; Viridiplantae; Streptophyta; Embryophyta; Tracheophyta; Spermatophyta; Magnoliophyta; eudicotyledons; Gunneridae; Pentapetalae; rosids; malvids; Brassicales; Brassicaceae; Camelineae; Arabidopsis	.	.	.	ENOG410Z9WV^NA	KEGG:ath:ArthMp003	GO:0005739^cellular_component^mitochondrion	.
c28587_g2_i5	-6.33628	7.2328851371036e-07	0.00111456308137296	c28587_g2	.	Gene.53959::c28587_g2_i5::g.53959::m.53959	949-623[-]	.	.	.	.	.
c20285_g1_i1	-7.43962	4.19392920924796e-06	0.00495194106385969	c20285_g1	.	Gene.8701::c20285_g1_i1::g.8701::m.8701	60-404[+]	.	.	.	.	.
c28704_g3_i1	-7.55459	1.74861331128069e-06	0.00233792171208392	c28704_g3	FH1_ARATH^FH1_ARATH^Q:1185-661,H:560-698^50%ID^E:5.26e-36^RecName: Full=Formin-like protein 1;^Eukaryota; Viridiplantae; Streptophyta; Embryophyta; Tracheophyta; Spermatophyta; Magnoliophyta; eudicotyledons; Gunneridae; Pentapetalae; rosids; malvids; Brassicales; Brassicaceae; Camelineae; Arabidopsis	Gene.55093::c28704_g3_i1::g.55093::m.55093	2514-994[-]	PF02181.20^FH2^Formin Homology 2 Domain^471-506^E:2.3e-08	ENOG41101C3^NA	KEGG:ath:AT2G43800	GO:0016021^cellular_component^integral component of membrane`GO:0005886^cellular_component^plasma membrane`GO:0003779^molecular_function^actin binding	.
c20285_g2_i1	-7.8125	2.0970594276274e-07	0.00038909867751347	c20285_g2	.	.	.	.	.	.	.	.
c31482_g6_i1	-8.11686	1.29593174423747e-08	3.02108272797021e-05	c31482_g6	.	Gene.85922::c31482_g6_i1::g.85922::m.85922	325-630[+]	.	.	.	.	.
c31142_g1_i14	-8.21723	4.84736689938038e-09	1.29620016585578e-05	c31142_g1	AB26B_ARATH^AB26B_ARATH^Q:2308-560,H:102-698^61.873%ID^E:0^RecName: Full=ABC transporter B family member 26, chloroplastic;^Eukaryota; Viridiplantae; Streptophyta; Embryophyta; Tracheophyta; Spermatophyta; Magnoliophyta; eudicotyledons; Gunneridae; Pentapetalae; rosids; malvids; Brassicales; Brassicaceae; Camelineae; Arabidopsis	Gene.82018::c31142_g1_i14::g.82018::m.82018	3197-5335[+]	PF04114.11^Gaa1^Gaa1-like, GPI transamidase component^150-704^E:8.6e-112	ENOG410XT16^glycosylphosphatidylinositol anchor attachment protein 1 homolog (yeast)	KEGG:mmu:14731`KO:K05289	GO:0042765^cellular_component^GPI-anchor transamidase complex`GO:0005887^cellular_component^integral component of plasma membrane`GO:0016020^cellular_component^membrane`GO:0034235^molecular_function^GPI anchor binding`GO:0003923^molecular_function^GPI-anchor transamidase activity`GO:0016255^biological_process^attachment of GPI anchor to protein`GO:0006506^biological_process^GPI anchor biosyntheti…	GO:0016021^cellular_component^integral component of membrane`GO:0042765^cellular_component^GPI-anchor transamidase complex
c12237_g1_i3	-Inf	2.52658158873484e-15	1.76286727845092e-11	c12237_g1	PT314_ARATH^PT314_ARATH^Q:60-1070,H:1-339^82.301%ID^E:6.53e-170^RecName: Full=Probable sugar phosphate/phosphate translocator At3g14410;^Eukaryota; Viridiplantae; Streptophyta; Embryophyta; Tracheophyta; Spermatophyta; Magnoliophyta; eudicotyledons; Gunneridae; Pentapetalae; rosids; malvids; Brassicales; Brassicaceae; Camelineae; Arabidopsis	Gene.2105::c12237_g1_i3::g.2105::m.2105	60-1073[+]	PF03151.13^TPT^Triose-phosphate Transporter family^17-304^E:1.3e-24	ENOG410XP1S^solute carrier family 35 member	KEGG:ath:AT3G14410	GO:0022626^cellular_component^cytosolic ribosome`GO:0016021^cellular_component^integral component of membrane`GO:0008643^biological_process^carbohydrate transport	.
c29650_g1_i7	-Inf	2.71457944040311e-15	1.76286727845092e-11	c29650_g1	Y4424_ARATH^Y4424_ARATH^Q:975-2426,H:1-480^79.012%ID^E:0^RecName: Full=DUF21 domain-containing protein At4g14240;^Eukaryota; Viridiplantae; Streptophyta; Embryophyta; Tracheophyta; Spermatophyta; Magnoliophyta; eudicotyledons; Gunneridae; Pentapetalae; rosids; malvids; Brassicales; Brassicaceae; Camelineae; Arabidopsis	Gene.65446::c29650_g1_i7::g.65446::m.65446	975-2459[+]	PF01595.17^DUF21^Domain of unknown function DUF21^41-210^E:1.1e-36	COG1253^CBS Domain protein	KEGG:ath:AT4G14240`KO:K16302	GO:0016021^cellular_component^integral component of membrane	.
c22798_g1_i2	-Inf	6.87362074170919e-15	4.1661931798265e-11	c22798_g1	BXL4_ARATH^BXL4_ARATH^Q:95-1432,H:4-452^79.111%ID^E:0^RecName: Full=Beta-D-xylosidase 4;^Eukaryota; Viridiplantae; Streptophyta; Embryophyta; Tracheophyta; Spermatophyta; Magnoliophyta; eudicotyledons; Gunneridae; Pentapetalae; rosids; malvids; Brassicales; Brassicaceae; Camelineae; Arabidopsis	Gene.16410::c22798_g1_i2::g.16410::m.16410	113-1444[+]	PF00933.18^Glyco_hydro_3^Glycosyl hydrolase family 3 N terminal domain^113-355^E:9.9e-38`PF01915.19^Glyco_hydro_3_C^Glycosyl hydrolase family 3 C-terminal domain^401-441^E:8.8e-07	COG1472^hydrolase family 3	KEGG:ath:AT5G64570`KO:K15920	GO:0048046^cellular_component^apoplast`GO:0005618^cellular_component^cell wall`GO:0009505^cellular_component^plant-type cell wall`GO:0005578^cellular_component^proteinaceous extracellular matrix`GO:0046556^molecular_function^alpha-L-arabinofuranosidase activity`GO:0009044^molecular_function^xylan 1,4-beta-xylosidase activity`GO:0031222^biological_process^arabinan catabolic process`GO:0009627^biol…	GO:0004553^molecular_function^hydrolase activity, hydrolyzing O-glycosyl compounds`GO:0005975^biological_process^carbohydrate metabolic process
c24051_g1_i3	-Inf	2.26583566308023e-12	9.809665760965e-09	c24051_g1	SP1L2_ARATH^SP1L2_ARATH^Q:351-626,H:1-95^58.947%ID^E:1.71e-26^RecName: Full=Protein SPIRAL1-like 2;^Eukaryota; Viridiplantae; Streptophyta; Embryophyta; Tracheophyta; Spermatophyta; Magnoliophyta; eudicotyledons; Gunneridae; Pentapetalae; rosids; malvids; Brassicales; Brassicaceae; Camelineae; Arabidopsis	Gene.21780::c24051_g1_i3::g.21780::m.21780	351-668[+]	.	ENOG410XU77^in maintaining the cortical microtubules organization essential for anisotropic cell growth	KEGG:ath:AT1G69230`KO:K18635	GO:0005874^cellular_component^microtubule	.
c20285_g1_i3	-Inf	4.18027854685092e-12	1.58357660268352e-08	c20285_g1	.	Gene.8703::c20285_g1_i3::g.8703::m.8703	2-355[+]	.	.	.	.	.
c24391_g1_i1	-Inf	4.53053524691629e-09	1.24818991831481e-05	c24391_g1	WDR82_DROME^WDR82_DROME^Q:232-1062,H:4-278^45.035%ID^E:3.08e-78^RecName: Full=WD repeat-containing protein 82 {ECO:0000250|UniProtKB:Q6UXN9};^Eukaryota; Metazoa; Ecdysozoa; Arthropoda; Hexapoda; Insecta; Pterygota; Neoptera; Endopterygota; Diptera; Brachycera; Muscomorpha; Ephydroidea; Drosophilidae; Drosophila; Sophophora	Gene.23239::c24391_g1_i1::g.23239::m.23239	211-1101[+]	PF00400.29^WD40^WD domain, G-beta repeat^28-55^E:0.0038`PF00400.29^WD40^WD domain, G-beta repeat^110-145^E:1.5e-05`PF00400.29^WD40^WD domain, G-beta repeat^255-275^E:0.00068	ENOG410XT9X^histone H3-K4 methylation	KEGG:dme:Dmel_CG17293`KO:K14962	GO:0035097^cellular_component^histone methyltransferase complex`GO:0048188^cellular_component^Set1C/COMPASS complex`GO:0051568^biological_process^histone H3-K4 methylation`GO:0080182^biological_process^histone H3-K4 trimethylation	GO:0005515^molecular_function^protein binding
c26084_g1_i2	-Inf	8.3197632924239e-09	2.10113310904807e-05	c26084_g1	KC1D_ARATH^KC1D_ARATH^Q:335-1384,H:1-349^70.538%ID^E:9.47e-167^RecName: Full=Casein kinase I isoform delta-like;^Eukaryota; Viridiplantae; Streptophyta; Embryophyta; Tracheophyta; Spermatophyta; Magnoliophyta; eudicotyledons; Gunneridae; Pentapetalae; rosids; malvids; Brassicales; Brassicaceae; Camelineae; Arabidopsis	Gene.33028::c26084_g1_i2::g.33028::m.33028	335-1636[+]	PF00069.22^Pkinase^Protein kinase domain^9-227^E:3.3e-29`PF07714.14^Pkinase_Tyr^Protein tyrosine kinase^10-268^E:1.8e-15	ENOG410XPGP^Casein Kinase	KEGG:ath:AT4G26100`KO:K02218	GO:0005737^cellular_component^cytoplasm`GO:0009506^cellular_component^plasmodesma`GO:0005524^molecular_function^ATP binding`GO:0004674^molecular_function^protein serine/threonine kinase activity`GO:0018105^biological_process^peptidyl-serine phosphorylation`GO:0016055^biological_process^Wnt signaling pathway	GO:0004672^molecular_function^protein kinase activity`GO:0005524^molecular_function^ATP binding`GO:0006468^biological_process^protein phosphorylation
c28097_g1_i1	-Inf	1.23892593290158e-08	2.97937710134144e-05	c28097_g1	PPR23_ARATH^PPR23_ARATH^Q:1421-2854,H:1-479^60.752%ID^E:0^RecName: Full=Pentatricopeptide repeat-containing protein At1g09190;^Eukaryota; Viridiplantae; Streptophyta; Embryophyta; Tracheophyta; Spermatophyta; Magnoliophyta; eudicotyledons; Gunneridae; Pentapetalae; rosids; malvids; Brassicales; Brassicaceae; Camelineae; Arabidopsis	Gene.49309::c28097_g1_i1::g.49309::m.49309	1406-2860[+]	PF13812.3^PPR_3^Pentatricopeptide repeat domain^69-118^E:0.00047`PF13041.3^PPR_2^PPR repeat family^70-118^E:1.9e-10`PF01535.17^PPR^PPR repeat^74-103^E:1.9e-06`PF12854.4^PPR_1^PPR repeat^171-200^E:9.1e-07`PF13041.3^PPR_2^PPR repeat family^172-204^E:1.6e-07`PF01535.17^PPR^PPR repeat^175-203^E:6.7e-08`PF13041.3^PPR_2^PPR repeat family^203-249^E:1.8e-09`PF12854.4^PPR_1^PPR repeat^203-231^E:1.6e-05`PF…	ENOG410Z7Z7^Pentatricopeptide repeat-containing protein	KEGG:ath:AT1G09190	.	.
c31565_g1_i4	-Inf	9.96378225106035e-08	0.000205881179754467	c31565_g1	IP5PF_ARATH^IP5PF_ARATH^Q:3823-563,H:54-1101^65.631%ID^E:0^RecName: Full=Type II inositol polyphosphate 5-phosphatase 15 {ECO:0000305};^Eukaryota; Viridiplantae; Streptophyta; Embryophyta; Tracheophyta; Spermatophyta; Magnoliophyta; eudicotyledons; Gunneridae; Pentapetalae; rosids; malvids; Brassicales; Brassicaceae; Camelineae; Arabidopsis	Gene.86667::c31565_g1_i4::g.86667::m.86667	4021-560[-]	PF00400.29^WD40^WD domain, G-beta repeat^242-271^E:0.13`PF03372.20^Exo_endo_phos^Endonuclease/Exonuclease/phosphatase family^561-723^E:2.1e-19`PF03372.20^Exo_endo_phos^Endonuclease/Exonuclease/phosphatase family^800-927^E:2.5e-24	COG5411^inositol	KEGG:ath:AT1G65580	GO:0046872^molecular_function^metal ion binding`GO:0004439^molecular_function^phosphatidylinositol-4,5-bisphosphate 5-phosphatase activity`GO:0046856^biological_process^phosphatidylinositol dephosphorylation	GO:0005515^molecular_function^protein binding
c22604_g1_i1	-Inf	1.97197826770271e-07	0.000373513225343181	c22604_g1	.	.	.	.	.	.	.	.
c26737_g1_i2	-Inf	3.77544196199363e-07	0.000647645012940708	c26737_g1	RING1_ARATH^RING1_ARATH^Q:1394-444,H:74-408^56.973%ID^E:4.19e-121^RecName: Full=E3 ubiquitin-protein ligase At1g12760;^Eukaryota; Viridiplantae; Streptophyta; Embryophyta; Tracheophyta; Spermatophyta; Magnoliophyta; eudicotyledons; Gunneridae; Pentapetalae; rosids; malvids; Brassicales; Brassicaceae; Camelineae; Arabidopsis	Gene.37856::c26737_g1_i2::g.37856::m.37856	1568-441[-]	PF13639.3^zf-RING_2^Ring finger domain^318-360^E:2.7e-12`PF17123.2^zf-RING_11^RING-like zinc finger^318-346^E:7.4e-07`PF00097.22^zf-C3HC4^Zinc finger, C3HC4 type (RING finger)^319-359^E:1.7e-05	ENOG41121N2^zinc ion binding	KEGG:ath:AT4G11680	GO:0016021^cellular_component^integral component of membrane`GO:0005774^cellular_component^vacuolar membrane`GO:0016874^molecular_function^ligase activity`GO:0008270^molecular_function^zinc ion binding`GO:0016567^biological_process^protein ubiquitination	GO:0005515^molecular_function^protein binding`GO:0008270^molecular_function^zinc ion binding`GO:0046872^molecular_function^metal ion binding
c22938_g1_i4	-Inf	4.39555969788443e-07	0.000727720986479064	c22938_g1	ALG5_DROME^ALG5_DROME^Q:1232-327,H:38-319^44.884%ID^E:1.33e-79^RecName: Full=Dolichyl-phosphate beta-glucosyltransferase {ECO:0000250|UniProtKB:Q9Y673};^Eukaryota; Metazoa; Ecdysozoa; Arthropoda; Hexapoda; Insecta; Pterygota; Neoptera; Endopterygota; Diptera; Brachycera; Muscomorpha; Ephydroidea; Drosophilidae; Drosophila; Sophophora	Gene.16976::c22938_g1_i4::g.16976::m.16976	1328-321[-]	PF00535.23^Glycos_transf_2^Glycosyl transferase family 2^69-182^E:2.5e-22	COG0463^Glycosyl transferase, family 2	KEGG:dme:Dmel_CG7870`KO:K00729	GO:0005783^cellular_component^endoplasmic reticulum`GO:0005789^cellular_component^endoplasmic reticulum membrane`GO:0016021^cellular_component^integral component of membrane`GO:0004582^molecular_function^dolichyl-phosphate beta-D-mannosyltransferase activity`GO:0004581^molecular_function^dolichyl-phosphate beta-glucosyltransferase activity`GO:0004169^molecular_function^dolichyl-phosphate-mannose-…	.
c30986_g1_i2	-Inf	5.67419735409375e-07	0.000889450001451969	c30986_g1	REV3_ARATH^REV3_ARATH^Q:6080-444,H:1-1890^56.256%ID^E:0^RecName: Full=DNA polymerase zeta catalytic subunit;^Eukaryota; Viridiplantae; Streptophyta; Embryophyta; Tracheophyta; Spermatophyta; Magnoliophyta; eudicotyledons; Gunneridae; Pentapetalae; rosids; malvids; Brassicales; Brassicaceae; Camelineae; Arabidopsis	Gene.80341::c30986_g1_i2::g.80341::m.80341	6080-441[-]	PF03104.16^DNA_pol_B_exo1^DNA polymerase family B, exonuclease domain^55-195^E:1.1e-05`PF03104.16^DNA_pol_B_exo1^DNA polymerase family B, exonuclease domain^1016-1138^E:1.1e-08`PF00136.18^DNA_pol_B^DNA polymerase family B^1277-1732^E:1.1e-100`PF14260.3^zf-C4pol^C4-type zinc-finger of DNA polymerase delta^1778-1851^E:6.1e-14	COG0417^DNA polymerase	.	GO:0005634^cellular_component^nucleus`GO:0016035^cellular_component^zeta DNA polymerase complex`GO:0008408^molecular_function^3'-5' exonuclease activity`GO:0051539^molecular_function^4 iron, 4 sulfur cluster binding`GO:0003677^molecular_function^DNA binding`GO:0003887^molecular_function^DNA-directed DNA polymerase activity`GO:0046872^molecular_function^metal ion binding`GO:0000166^molecular_funct…	GO:0008408^molecular_function^3'-5' exonuclease activity`GO:0000166^molecular_function^nucleotide binding`GO:0003677^molecular_function^DNA binding
c29438_g7_i3	-Inf	8.14489215951601e-07	0.00123418193411119	c29438_g7	ALN_ARATH^ALN_ARATH^Q:2015-537,H:41-506^72.121%ID^E:0^RecName: Full=Allantoinase;^Eukaryota; Viridiplantae; Streptophyta; Embryophyta; Tracheophyta; Spermatophyta; Magnoliophyta; eudicotyledons; Gunneridae; Pentapetalae; rosids; malvids; Brassicales; Brassicaceae; Camelineae; Arabidopsis	Gene.63160::c29438_g7_i3::g.63160::m.63160	1472-522[-]	PF01979.17^Amidohydro_1^Amidohydrolase family^12-293^E:1.5e-13	COG0044^Dihydroorotase	KEGG:ath:AT4G04955`KO:K01466	GO:0005783^cellular_component^endoplasmic reticulum`GO:0004038^molecular_function^allantoinase activity`GO:0050897^molecular_function^cobalt ion binding`GO:0008270^molecular_function^zinc ion binding`GO:0000256^biological_process^allantoin catabolic process`GO:0006995^biological_process^cellular response to nitrogen starvation`GO:0006145^biological_process^purine nucleobase catabolic process`GO:0…	GO:0016787^molecular_function^hydrolase activity
c28984_g1_i3	-Inf	1.30544578122587e-06	0.0018259571398725	c28984_g1	HSDD1_ARATH^HSDD1_ARATH^Q:2775-1813,H:7-326^66.667%ID^E:4.56e-145^RecName: Full=3beta-hydroxysteroid-dehydrogenase/decarboxylase isoform 1;^Eukaryota; Viridiplantae; Streptophyta; Embryophyta; Tracheophyta; Spermatophyta; Magnoliophyta; eudicotyledons; Gunneridae; Pentapetalae; rosids; malvids; Brassicales; Brassicaceae; Camelineae; Arabidopsis`HSDD1_ARATH^HSDD1_ARATH^Q:1493-987,H:282-438^51.744%…	Gene.58367::c28984_g1_i3::g.58367::m.58367	2784-1699[-]	PF01073.16^3Beta_HSD^3-beta hydroxysteroid dehydrogenase/isomerase family^10-279^E:5.1e-74`PF01370.18^Epimerase^NAD dependent epimerase/dehydratase family^10-237^E:2.3e-31`PF02719.12^Polysacc_synt_2^Polysaccharide biosynthesis protein^10-130^E:5.1e-07`PF16363.2^GDP_Man_Dehyd^GDP-mannose 4,6 dehydratase^11-271^E:3.9e-15`PF07993.9^NAD_binding_4^Male sterility protein^11-191^E:1.5e-12`PF13460.3^NAD_…	COG0451^Nad-dependent epimerase dehydratase	KEGG:ath:AT1G47290`KO:K07748	GO:0005789^cellular_component^endoplasmic reticulum membrane`GO:0016021^cellular_component^integral component of membrane`GO:0016020^cellular_component^membrane`GO:0003854^molecular_function^3-beta-hydroxy-delta5-steroid dehydrogenase activity`GO:0047012^molecular_function^sterol-4-alpha-carboxylate 3-dehydrogenase (decarboxylating) activity`GO:0016126^biological_process^sterol biosynthetic proce…	GO:0003854^molecular_function^3-beta-hydroxy-delta5-steroid dehydrogenase activity`GO:0016616^molecular_function^oxidoreductase activity, acting on the CH-OH group of donors, NAD or NADP as acceptor`GO:0006694^biological_process^steroid biosynthetic process`GO:0055114^biological_process^oxidation-reduction process`GO:0003824^molecular_function^catalytic activity`GO:0050662^molecular_function^coen…
c30056_g7_i7	-Inf	1.70250888293041e-06	0.00231025373297589	c30056_g7	FAB1B_ARATH^FAB1B_ARATH^Q:5601-187,H:1-1786^59.15%ID^E:0^RecName: Full=1-phosphatidylinositol-3-phosphate 5-kinase FAB1B;^Eukaryota; Viridiplantae; Streptophyta; Embryophyta; Tracheophyta; Spermatophyta; Magnoliophyta; eudicotyledons; Gunneridae; Pentapetalae; rosids; malvids; Brassicales; Brassicaceae; Camelineae; Arabidopsis	Gene.69626::c30056_g7_i7::g.69626::m.69626	5601-160[-]	PF01363.18^FYVE^FYVE zinc finger^33-102^E:3.7e-16`PF00118.21^Cpn60_TCP1^TCP-1/cpn60 chaperonin family^411-656^E:1.8e-33`PF01504.15^PIP5K^Phosphatidylinositol-4-phosphate 5-Kinase^1553-1775^E:1.5e-46	COG0459^Prevents misfolding and promotes the refolding and proper assembly of unfolded polypeptides generated under stress conditions (By similarity)`COG5253^phosphatidylinositol-4-phosphate 5-kinase	KEGG:ath:AT3G14270`KO:K00921	GO:0005768^cellular_component^endosome`GO:0010008^cellular_component^endosome membrane`GO:0005739^cellular_component^mitochondrion`GO:0000285^molecular_function^1-phosphatidylinositol-3-phosphate 5-kinase activity`GO:0005524^molecular_function^ATP binding`GO:0046872^molecular_function^metal ion binding`GO:0010256^biological_process^endomembrane system organization`GO:0046854^biological_process^ph…	GO:0046872^molecular_function^metal ion binding`GO:0005524^molecular_function^ATP binding`GO:0016307^molecular_function^phosphatidylinositol phosphate kinase activity`GO:0046488^biological_process^phosphatidylinositol metabolic process
c29350_g2_i1	-Inf	1.89465116623715e-06	0.00246080000115404	c29350_g2	.	Gene.62279::c29350_g2_i1::g.62279::m.62279	294-1019[+]	PF07797.11^DUF1639^Protein of unknown function (DUF1639)^183-232^E:2.9e-28	.	.	.	.
c17830_g1_i1	-Inf	3.63026074416543e-06	0.00434279494838538	c17830_g1	.	Gene.4909::c17830_g1_i1::g.4909::m.4909	2-775[+]	.	.	.	.	.
c26635_g1_i1	-Inf	4.78140327563391e-06	0.00557321591808729	c26635_g1	TPPC8_HUMAN^TPPC8_HUMAN^Q:5152-4061,H:337-724^32.821%ID^E:1.81e-48^RecName: Full=Trafficking protein particle complex subunit 8;^Eukaryota; Metazoa; Chordata; Craniata; Vertebrata; Euteleostomi; Mammalia; Eutheria; Euarchontoglires; Primates; Haplorrhini; Catarrhini; Hominidae; Homo`TPPC8_HUMAN^TPPC8_HUMAN^Q:5899-5183,H:10-248^26.587%ID^E:1.38e-14^RecName: Full=Trafficking protein particle comple…	Gene.36928::c26635_g1_i1::g.36928::m.36928	5929-3962[-]	PF12739.4^TRAPPC-Trs85^ER-Golgi trafficking TRAPP I complex 85 kDa subunit^165-519^E:5.2e-90	ENOG410XPCJ^trafficking protein particle complex	KEGG:hsa:22878	GO:0031410^cellular_component^cytoplasmic vesicle`GO:0000407^cellular_component^pre-autophagosomal structure`GO:1990072^cellular_component^TRAPPIII protein complex`GO:0000045^biological_process^autophagosome assembly`GO:0032258^biological_process^CVT pathway`GO:0006888^biological_process^ER to Golgi vesicle-mediated transport`GO:0044804^biological_process^nucleophagy`GO:0030242^biological_process…	.
c31176_g2_i8	-Inf	5.05381214060853e-06	0.0058161701061735	c31176_g2	DPOE1_ARATH^DPOE1_ARATH^Q:7350-4888,H:4-825^84.672%ID^E:0^RecName: Full=DNA polymerase epsilon catalytic subunit A;^Eukaryota; Viridiplantae; Streptophyta; Embryophyta; Tracheophyta; Spermatophyta; Magnoliophyta; eudicotyledons; Gunneridae; Pentapetalae; rosids; malvids; Brassicales; Brassicaceae; Camelineae; Arabidopsis`DPOE1_ARATH^DPOE1_ARATH^Q:4898-2928,H:822-1452^72.644%ID^E:0^RecName: Full=D…	Gene.82371::c31176_g2_i8::g.82371::m.82371	7353-4870[-]	PF03104.16^DNA_pol_B_exo1^DNA polymerase family B, exonuclease domain^71-398^E:3e-84`PF00136.18^DNA_pol_B^DNA polymerase family B^752-825^E:7e-10	COG0417^DNA polymerase	KEGG:ath:AT1G08260`KO:K02324	GO:0008622^cellular_component^epsilon DNA polymerase complex`GO:0008408^molecular_function^3'-5' exonuclease activity`GO:0051539^molecular_function^4 iron, 4 sulfur cluster binding`GO:0003677^molecular_function^DNA binding`GO:0003887^molecular_function^DNA-directed DNA polymerase activity`GO:0000166^molecular_function^nucleotide binding`GO:0008270^molecular_function^zinc ion binding`GO:0006260^bi…	GO:0008408^molecular_function^3'-5' exonuclease activity`GO:0000166^molecular_function^nucleotide binding`GO:0003677^molecular_function^DNA binding
c29489_g1_i2	-Inf	5.34232019637958e-06	0.00607134656617802	c29489_g1	FRS5_ARATH^FRS5_ARATH^Q:445-2766,H:24-786^63.368%ID^E:0^RecName: Full=Protein FAR1-RELATED SEQUENCE 5;^Eukaryota; Viridiplantae; Streptophyta; Embryophyta; Tracheophyta; Spermatophyta; Magnoliophyta; eudicotyledons; Gunneridae; Pentapetalae; rosids; malvids; Brassicales; Brassicaceae; Camelineae; Arabidopsis	Gene.63715::c29489_g1_i2::g.63715::m.63715	442-2769[+]	PF03101.12^FAR1^FAR1 DNA-binding domain^67-162^E:7.1e-30`PF10551.6^MULE^MULE transposase domain^283-375^E:2.1e-31`PF04434.14^SWIM^SWIM zinc finger^550-596^E:8.2e-12	ENOG410ZJSX^protein FAR1-RELATED SEQUENCE 5-like	KEGG:ath:AT4G38180	GO:0005634^cellular_component^nucleus`GO:0008270^molecular_function^zinc ion binding`GO:0006355^biological_process^regulation of transcription, DNA-templated	GO:0008270^molecular_function^zinc ion binding
c31104_g2_i8	-Inf	6.67801446078219e-06	0.00731500049073415	c31104_g2	FAB1C_ARATH^FAB1C_ARATH^Q:128-2134,H:1032-1648^63.353%ID^E:0^RecName: Full=Putative 1-phosphatidylinositol-3-phosphate 5-kinase FAB1C;^Eukaryota; Viridiplantae; Streptophyta; Embryophyta; Tracheophyta; Spermatophyta; Magnoliophyta; eudicotyledons; Gunneridae; Pentapetalae; rosids; malvids; Brassicales; Brassicaceae; Camelineae; Arabidopsis	Gene.81529::c31104_g2_i8::g.81529::m.81529	143-2137[+]	PF01504.15^PIP5K^Phosphatidylinositol-4-phosphate 5-Kinase^430-653^E:3.1e-47	COG0459^Prevents misfolding and promotes the refolding and proper assembly of unfolded polypeptides generated under stress conditions (By similarity)`COG5253^phosphatidylinositol-4-phosphate 5-kinase	KEGG:ath:AT1G71010`KO:K00921	GO:0000285^molecular_function^1-phosphatidylinositol-3-phosphate 5-kinase activity`GO:0005524^molecular_function^ATP binding`GO:0046854^biological_process^phosphatidylinositol phosphorylation`GO:0090332^biological_process^stomatal closure	GO:0016307^molecular_function^phosphatidylinositol phosphate kinase activity`GO:0046488^biological_process^phosphatidylinositol metabolic process
c15514_g1_i1	-Inf	7.06311132596331e-06	0.00764472490979293	c15514_g1	.	.	.	.	.	.	.	.
c26643_g1_i2	-Inf	8.36240349607011e-06	0.00884051905409542	c26643_g1	.	.	.	.	.	.	.	.
c26654_g1_i3	-Inf	9.91067125951509e-06	0.0102391874875152	c26654_g1	WVD2_ARATH^WVD2_ARATH^Q:879-1238,H:68-176^46.667%ID^E:5.01e-25^RecName: Full=Protein WAVE-DAMPENED 2;^Eukaryota; Viridiplantae; Streptophyta; Embryophyta; Tracheophyta; Spermatophyta; Magnoliophyta; eudicotyledons; Gunneridae; Pentapetalae; rosids; malvids; Brassicales; Brassicaceae; Camelineae; Arabidopsis	Gene.37093::c26654_g1_i3::g.37093::m.37093	324-1577[+]	PF06886.8^TPX2^Targeting protein for Xklp2 (TPX2)^218-274^E:8.9e-21	ENOG411061M^Targeting protein for Xklp2 (TPX2)	KEGG:ath:AT5G28646	GO:0055028^cellular_component^cortical microtubule`GO:0007163^biological_process^establishment or maintenance of cell polarity`GO:0001578^biological_process^microtubule bundle formation`GO:0000226^biological_process^microtubule cytoskeleton organization`GO:0009825^biological_process^multidimensional cell growth`GO:0010091^biological_process^trichome branching	.
c29188_g3_i3	-Inf	1.17575368262637e-05	0.0114941932863808	c29188_g3	.	Gene.60585::c29188_g3_i3::g.60585::m.60585	530-2320[+]	PF04765.10^DUF616^Protein of unknown function (DUF616)^221-534^E:1.5e-147	.	.	.	.
c29111_g2_i10	-Inf	1.17575368262637e-05	0.0114941932863808	c29111_g2	TAF2_ARATH^TAF2_ARATH^Q:71-2359,H:1-767^71.969%ID^E:0^RecName: Full=Transcription initiation factor TFIID subunit 2;^Eukaryota; Viridiplantae; Streptophyta; Embryophyta; Tracheophyta; Spermatophyta; Magnoliophyta; eudicotyledons; Gunneridae; Pentapetalae; rosids; malvids; Brassicales; Brassicaceae; Camelineae; Arabidopsis`TAF2_ARATH^TAF2_ARATH^Q:4199-5656,H:758-1284^52.15%ID^E:1.03e-131^RecName: …	Gene.59729::c29111_g2_i10::g.59729::m.59729	71-2365[+]	PF01433.17^Peptidase_M1^Peptidase family M1^172-400^E:4e-14	ENOG410XS52^TAF2 RNA polymerase II, TATA box binding protein (TBP)-associated factor	KEGG:ath:AT1G73960`KO:K03128	GO:0009506^cellular_component^plasmodesma`GO:0005669^cellular_component^transcription factor TFIID complex`GO:0003682^molecular_function^chromatin binding`GO:0008237^molecular_function^metallopeptidase activity`GO:0001129^molecular_function^RNA polymerase II transcription factor activity, TBP-class protein binding, involved in preinitiation complex assembly`GO:0043565^molecular_function^sequence-…	GO:0008237^molecular_function^metallopeptidase activity`GO:0008270^molecular_function^zinc ion binding
c27190_g4_i4	-Inf	2.64614770007677e-05	0.024057981044788	c27190_g4	PRL1_ARATH^PRL1_ARATH^Q:1287-79,H:1-404^74.328%ID^E:0^RecName: Full=Protein pleiotropic regulatory locus 1;^Eukaryota; Viridiplantae; Streptophyta; Embryophyta; Tracheophyta; Spermatophyta; Magnoliophyta; eudicotyledons; Gunneridae; Pentapetalae; rosids; malvids; Brassicales; Brassicaceae; Camelineae; Arabidopsis	Gene.41399::c27190_g4_i4::g.41399::m.41399	1287-1[-]	PF00400.29^WD40^WD domain, G-beta repeat^165-203^E:2.1e-10`PF00400.29^WD40^WD domain, G-beta repeat^210-245^E:8.6e-05`PF00400.29^WD40^WD domain, G-beta repeat^250-287^E:4.5e-05`PF00400.29^WD40^WD domain, G-beta repeat^296-329^E:8e-05	ENOG410XQV9^Pleiotropic regulator 1	KEGG:ath:AT4G15900`KO:K12862	GO:0071013^cellular_component^catalytic step 2 spliceosome`GO:0080008^cellular_component^Cul4-RING E3 ubiquitin ligase complex`GO:0005634^cellular_component^nucleus`GO:0071011^cellular_component^precatalytic spliceosome`GO:0000974^cellular_component^Prp19 complex`GO:0048825^biological_process^cotyledon development`GO:0009870^biological_process^defense response signaling pathway, resistance gene-d…	GO:0005515^molecular_function^protein binding
c30224_g2_i4	-Inf	3.77301254171365e-05	0.0333039787626194	c30224_g2	FB92_ARATH^FB92_ARATH^Q:362-3256,H:4-943^61.538%ID^E:0^RecName: Full=F-box protein At1g78280;^Eukaryota; Viridiplantae; Streptophyta; Embryophyta; Tracheophyta; Spermatophyta; Magnoliophyta; eudicotyledons; Gunneridae; Pentapetalae; rosids; malvids; Brassicales; Brassicaceae; Camelineae; Arabidopsis	Gene.71506::c30224_g2_i4::g.71506::m.71506	329-3271[+]	PF00646.30^F-box^F-box domain^28-68^E:4.7e-06`PF12937.4^F-box-like^F-box-like^28-71^E:1.3e-05`PF13621.3^Cupin_8^Cupin-like domain^157-374^E:1.9e-16`PF02373.19^JmjC^JmjC domain, hydroxylase^258-371^E:2.5e-15	ENOG410XQCR^jumonji domain containing 6	KEGG:ath:AT1G78280	GO:0005829^cellular_component^cytosol	GO:0005515^molecular_function^protein binding
c29438_g1_i2	-Inf	4.51272539015572e-05	0.037989208731184	c29438_g1	BOR1_ARATH^BOR1_ARATH^Q:357-2522,H:1-696^75.41%ID^E:0^RecName: Full=Boron transporter 1;^Eukaryota; Viridiplantae; Streptophyta; Embryophyta; Tracheophyta; Spermatophyta; Magnoliophyta; eudicotyledons; Gunneridae; Pentapetalae; rosids; malvids; Brassicales; Brassicaceae; Camelineae; Arabidopsis	Gene.63130::c29438_g1_i2::g.63130::m.63130	357-2528[+]	PF00955.18^HCO3_cotransp^HCO3- transporter family^6-179^E:1.8e-36`PF00955.18^HCO3_cotransp^HCO3- transporter family^202-372^E:4.8e-25`PF00955.18^HCO3_cotransp^HCO3- transporter family^451-541^E:4.8e-19	ENOG410XPHD^solute carrier family 4	KEGG:ath:AT3G62270	GO:0016021^cellular_component^integral component of membrane`GO:0005886^cellular_component^plasma membrane`GO:0005452^molecular_function^inorganic anion exchanger activity`GO:0048364^biological_process^root development	GO:0006820^biological_process^anion transport`GO:0016021^cellular_component^integral component of membrane
c30056_g5_i8	-Inf	5.08792053066261e-05	0.0416737361158786	c30056_g5	.	Gene.69592::c30056_g5_i8::g.69592::m.69592	1967-3961[+]	.	.	.	.	.
c29211_g3_i5	-Inf	5.08792053066261e-05	0.0416737361158786	c29211_g3	ZFY26_BOVIN^ZFY26_BOVIN^Q:3094-5229,H:1885-2500^21.774%ID^E:4.69e-23^RecName: Full=Zinc finger FYVE domain-containing protein 26;^Eukaryota; Metazoa; Chordata; Craniata; Vertebrata; Euteleostomi; Mammalia; Eutheria; Laurasiatheria; Cetartiodactyla; Ruminantia; Pecora; Bovidae; Bovinae; Bos	Gene.60832::c29211_g3_i5::g.60832::m.60832	157-5244[+]	.	ENOG410XRV7^Zinc finger, FYVE domain containing 26	KEGG:ddi:DDB_G0276689`KEGG:ddi:DDB_G0276691`KO:K19027	.	.
c29114_g2_i8	-Inf	5.40345916443253e-05	0.0434748935267887	c29114_g2	CAAT9_ARATH^CAAT9_ARATH^Q:1015-1884,H:279-568^69.178%ID^E:3.27e-110^RecName: Full=Cationic amino acid transporter 9, chloroplastic;^Eukaryota; Viridiplantae; Streptophyta; Embryophyta; Tracheophyta; Spermatophyta; Magnoliophyta; eudicotyledons; Gunneridae; Pentapetalae; rosids; malvids; Brassicales; Brassicaceae; Camelineae; Arabidopsis`CAAT9_ARATH^CAAT9_ARATH^Q:87-869,H:16-279^73.962%ID^E:1.7e-1…	Gene.59779::c29114_g2_i8::g.59779::m.59779	3-923[+]	PF13520.3^AA_permease_2^Amino acid permease^61-288^E:2.8e-27`PF00324.18^AA_permease^Amino acid permease^66-289^E:2.8e-14	COG0531^amino acid	KEGG:ath:AT1G05940	GO:0031969^cellular_component^chloroplast membrane`GO:0016021^cellular_component^integral component of membrane`GO:0005774^cellular_component^vacuolar membrane`GO:0015297^molecular_function^antiporter activity`GO:0015179^molecular_function^L-amino acid transmembrane transporter activity`GO:1902475^biological_process^L-alpha-amino acid transmembrane transport`GO:0015807^biological_process^L-amino …	GO:0015171^molecular_function^amino acid transmembrane transporter activity`GO:0003333^biological_process^amino acid transmembrane transport`GO:0016020^cellular_component^membrane`GO:0006810^biological_process^transport`GO:0055085^biological_process^transmembrane transport
c31639_g1_i1	-Inf	6.09673911812727e-05	0.0481997591654588	c31639_g1	PIE1_ARATH^PIE1_ARATH^Q:5856-541,H:331-2054^64.29%ID^E:0^RecName: Full=Protein PHOTOPERIOD-INDEPENDENT EARLY FLOWERING 1;^Eukaryota; Viridiplantae; Streptophyta; Embryophyta; Tracheophyta; Spermatophyta; Magnoliophyta; eudicotyledons; Gunneridae; Pentapetalae; rosids; malvids; Brassicales; Brassicaceae; Camelineae; Arabidopsis`PIE1_ARATH^PIE1_ARATH^Q:6690-6130,H:13-192^48.744%ID^E:3.54e-37^RecNam…	Gene.87133::c31639_g1_i1::g.87133::m.87133	5424-535[-]	PF04851.12^ResIII^Type III restriction enzyme, res subunit^88-249^E:3.5e-09`PF00176.20^SNF2_N^SNF2 family N-terminal domain^104-378^E:1.1e-69`PF00270.26^DEAD^DEAD/DEAH box helicase^112-238^E:5e-05`PF00271.28^Helicase_C^Helicase conserved C-terminal domain^633-743^E:1.6e-19	ENOG410XP0A^chromatin modification	KEGG:ath:AT3G12810`KO:K11320	GO:0005618^cellular_component^cell wall`GO:0016514^cellular_component^SWI/SNF complex`GO:0005524^molecular_function^ATP binding`GO:0003677^molecular_function^DNA binding`GO:0004386^molecular_function^helicase activity`GO:0030154^biological_process^cell differentiation`GO:0016568^biological_process^chromatin modification`GO:0042742^biological_process^defense response to bacterium`GO:0009908^biolog…	GO:0003677^molecular_function^DNA binding`GO:0005524^molecular_function^ATP binding`GO:0016787^molecular_function^hydrolase activity`GO:0003676^molecular_function^nucleic acid binding
Up-regulated genes
Down-regulated genes

## Sheet: GO aged-seeds vs MG aged-seeds
id	log2FoldChange	pval	padj	#gene_id	sprot_Top_BLASTP_hit	prot_id	prot_coords	Pfam	eggnog	Kegg	gene_ontology_blast	gene_ontology_pfam
c29673_g2_i15	9.69131	1.63969e-16	1.09829e-12	c29673_g2	.	Gene.65665::c29673_g2_i15::g.65665::m.65665	259-744[+]	.	.	.	.	.
c29351_g4_i1	8.27006	1.18751e-14	5.68151e-11	c29351_g4	PER42_ARATH^PER42_ARATH^Q:1-328,H:1-330^79.394%ID^E:0^RecName: Full=Peroxidase 42;^Eukaryota; Viridiplantae; Streptophyta; Embryophyta; Tracheophyta; Spermatophyta; Magnoliophyta; eudicotyledons; Gunneridae; Pentapetalae; rosids; malvids; Brassicales; Brassicaceae; Camelineae; Arabidopsis	Gene.62304::c29351_g4_i1::g.62304::m.62304	1462-476[-]	PF00141.20^peroxidase^Peroxidase^46-289^E:2.3e-61	ENOG4111GTW^peroxidase	KEGG:ath:AT4G21960`KO:K00430	GO:0005576^cellular_component^extracellular region`GO:0009505^cellular_component^plant-type cell wall`GO:0020037^molecular_function^heme binding`GO:0046872^molecular_function^metal ion binding`GO:0004601^molecular_function^peroxidase activity`GO:0098869^biological_process^cellular oxidant detoxification`GO:0042744^biological_process^hydrogen peroxide catabolic process`GO:0009664^biological_proces…	GO:0004601^molecular_function^peroxidase activity`GO:0020037^molecular_function^heme binding`GO:0006979^biological_process^response to oxidative stress`GO:0055114^biological_process^oxidation-reduction process
c30386_g1_i6	7.96867	5.9442e-07	0.000455897	c30386_g1	POLX_TOBAC^POLX_TOBAC^Q:4-789,H:511-1327^38.706%ID^E:0^RecName: Full=Retrovirus-related Pol polyprotein from transposon TNT 1-94;^Eukaryota; Viridiplantae; Streptophyta; Embryophyta; Tracheophyta; Spermatophyta; Magnoliophyta; eudicotyledons; Gunneridae; Pentapetalae; asterids; lamiids; Solanales; Solanaceae; Nicotianoideae; Nicotianeae; Nicotiana	Gene.73319::c30386_g1_i6::g.73319::m.73319	1940-4330[+]	PF00665.23^rve^Integrase core domain^12-86^E:1.1e-15`PF07727.11^RVT_2^Reverse transcriptase (RNA-dependent DNA polymerase)^310-553^E:1.1e-101	.	.	GO:0004190^molecular_function^aspartic-type endopeptidase activity`GO:0004519^molecular_function^endonuclease activity`GO:0003676^molecular_function^nucleic acid binding`GO:0003964^molecular_function^RNA-directed DNA polymerase activity`GO:0008270^molecular_function^zinc ion binding`GO:0015074^biological_process^DNA integration	GO:0015074^biological_process^DNA integration
c31142_g1_i14	7.39232	2.64798e-05	0.0109036	c31142_g1	GPAA1_MOUSE^GPAA1_MOUSE^Q:14-625,H:9-537^27.492%ID^E:1.35e-39^RecName: Full=Glycosylphosphatidylinositol anchor attachment 1 protein;^Eukaryota; Metazoa; Chordata; Craniata; Vertebrata; Euteleostomi; Mammalia; Eutheria; Euarchontoglires; Glires; Rodentia; Sciurognathi; Muroidea; Muridae; Murinae; Mus; Mus	Gene.81993::c31142_g1_i7::g.81993::m.81993	3337-5475[+]	PF04114.11^Gaa1^Gaa1-like, GPI transamidase component^150-704^E:8.6e-112	ENOG410XT16^glycosylphosphatidylinositol anchor attachment protein 1 homolog (yeast)	KEGG:mmu:14731`KO:K05289	GO:0042765^cellular_component^GPI-anchor transamidase complex`GO:0005887^cellular_component^integral component of plasma membrane`GO:0016020^cellular_component^membrane`GO:0034235^molecular_function^GPI anchor binding`GO:0003923^molecular_function^GPI-anchor transamidase activity`GO:0016255^biological_process^attachment of GPI anchor to protein`GO:0006506^biological_process^GPI anchor biosyntheti…	GO:0016021^cellular_component^integral component of membrane`GO:0042765^cellular_component^GPI-anchor transamidase complex
c30770_g2_i1	7.29002	1.82287e-07	0.000162078	c30770_g2	R13L1_ARATH^R13L1_ARATH^Q:1-281,H:664-960^37.248%ID^E:1.01e-44^RecName: Full=Putative disease resistance RPP13-like protein 1;^Eukaryota; Viridiplantae; Streptophyta; Embryophyta; Tracheophyta; Spermatophyta; Magnoliophyta; eudicotyledons; Gunneridae; Pentapetalae; rosids; malvids; Brassicales; Brassicaceae; Camelineae; Arabidopsis	Gene.77669::c30770_g2_i1::g.77669::m.77669	2031-4316[+]	.	COG4886^leucine Rich Repeat	KEGG:ath:AT3G14470	GO:0043531^molecular_function^ADP binding`GO:0005524^molecular_function^ATP binding`GO:0006952^biological_process^defense response	.
c28773_g1_i2	6.79442	6.00828e-06	0.00317718	c28773_g1	CDKA2_ORYSJ^CDKA2_ORYSJ^Q:37-196,H:9-177^28.402%ID^E:1.45e-13^RecName: Full=Cyclin-dependent kinase A-2;^Eukaryota; Viridiplantae; Streptophyta; Embryophyta; Tracheophyta; Spermatophyta; Magnoliophyta; Liliopsida; Poales; Poaceae; BOP clade; Oryzoideae; Oryzeae; Oryzinae; Oryza	Gene.55921::c28773_g1_i2::g.55921::m.55921	429-1022[+]	PF00069.22^Pkinase^Protein kinase domain^44-166^E:2.3e-17`PF07714.14^Pkinase_Tyr^Protein tyrosine kinase^46-173^E:2e-08	ENOG410XPP3^Cyclin-Dependent Kinase	KEGG:osa:4328135`KO:K02206	GO:0005524^molecular_function^ATP binding`GO:0004693^molecular_function^cyclin-dependent protein serine/threonine kinase activity`GO:0008353^molecular_function^RNA polymerase II carboxy-terminal domain kinase activity	GO:0004672^molecular_function^protein kinase activity`GO:0005524^molecular_function^ATP binding`GO:0006468^biological_process^protein phosphorylation
c28773_g1_i3	6.49985	3.7655e-05	0.0146072	c28773_g1	.	.	.	.	.	.	.	.
c22543_g3_i1	6.46352	2.93744e-07	0.000245942	c22543_g3	.	.	.	.	ENOG410ZBK1^voltage-dependent anion channel	KEGG:sot:102580103`KO:K15040	GO:0005741^cellular_component^mitochondrial outer membrane`GO:0046930^cellular_component^pore complex`GO:0015288^molecular_function^porin activity`GO:0008308^molecular_function^voltage-gated anion channel activity	.
c28365_g1_i1	6.45943	4.77196e-05	0.0176208	c28365_g1	NOA1_ARATH^NOA1_ARATH^Q:31-312,H:1-285^70.588%ID^E:1.92e-115^RecName: Full=NO-associated protein 1, chloroplastic/mitochondrial;^Eukaryota; Viridiplantae; Streptophyta; Embryophyta; Tracheophyta; Spermatophyta; Magnoliophyta; eudicotyledons; Gunneridae; Pentapetalae; rosids; malvids; Brassicales; Brassicaceae; Camelineae; Arabidopsis	Gene.51653::c28365_g1_i1::g.51653::m.51653	2561-1578[-]	.	COG1161^Required for a late step of 50S ribosomal subunit assembly. Has GTPase activity (By similarity)	KEGG:ath:AT3G47450`KO:K13427	GO:0009507^cellular_component^chloroplast`GO:0005739^cellular_component^mitochondrion`GO:0005525^molecular_function^GTP binding`GO:0016787^molecular_function^hydrolase activity`GO:0004517^molecular_function^nitric-oxide synthase activity`GO:0009651^biological_process^response to salt stress	.
c23433_g1_i3	6.44846	2.89127e-06	0.00169878	c23433_g1	.	Gene.18874::c23433_g1_i3::g.18874::m.18874	321-1715[+]	PF14365.3^DUF4409^Domain of unknown function (DUF4409)^116-223^E:1.5e-37`PF03080.12^DUF239^Domain of unknown function (DUF239)^236-457^E:4.5e-90	.	.	.	.
c28350_g5_i4	6.3443	9.18477e-05	0.0302843	c28350_g5	AB25B_ORYSJ^AB25B_ORYSJ^Q:10-645,H:10-637^77.83%ID^E:0^RecName: Full=ABC transporter B family member 25;^Eukaryota; Viridiplantae; Streptophyta; Embryophyta; Tracheophyta; Spermatophyta; Magnoliophyta; Liliopsida; Poales; Poaceae; BOP clade; Oryzoideae; Oryzeae; Oryzinae; Oryza	Gene.51511::c28350_g5_i4::g.51511::m.51511	230-2215[+]	PF00664.20^ABC_membrane^ABC transporter transmembrane region^63-338^E:7e-62`PF00005.24^ABC_tran^ABC transporter^406-556^E:4.6e-35	COG1132^(ABC) transporter	KEGG:osa:4334151	GO:0016021^cellular_component^integral component of membrane`GO:0000325^cellular_component^plant-type vacuole`GO:0005774^cellular_component^vacuolar membrane`GO:0005524^molecular_function^ATP binding`GO:0042626^molecular_function^ATPase activity, coupled to transmembrane movement of substances`GO:0010044^biological_process^response to aluminum ion`GO:0055085^biological_process^transmembrane trans…	GO:0005524^molecular_function^ATP binding`GO:0042626^molecular_function^ATPase activity, coupled to transmembrane movement of substances`GO:0006810^biological_process^transport`GO:0055085^biological_process^transmembrane transport`GO:0016021^cellular_component^integral component of membrane`GO:0016887^molecular_function^ATPase activity
c30362_g1_i5	6.25739	1.02186e-05	0.00491234	c30362_g1	NOC2L_ARATH^NOC2L_ARATH^Q:1-340,H:391-733^64.489%ID^E:2.62e-143^RecName: Full=Nucleolar complex protein 2 homolog;^Eukaryota; Viridiplantae; Streptophyta; Embryophyta; Tracheophyta; Spermatophyta; Magnoliophyta; eudicotyledons; Gunneridae; Pentapetalae; rosids; malvids; Brassicales; Brassicaceae; Camelineae; Arabidopsis	Gene.73078::c30362_g1_i5::g.73078::m.73078	1395-241[-]	PF03715.10^Noc2^Noc2p family^1-213^E:8.6e-73	COG5604^nucleolar complex protein 2	KEGG:ath:AT2G18220`KO:K14833	GO:0005634^cellular_component^nucleus	.
c30403_g1_i4	6.12756	1.76168e-07	0.000158036	c30403_g1	DCK_HUMAN^DCK_HUMAN^Q:219-397,H:24-217^40.404%ID^E:2.14e-39^RecName: Full=Deoxycytidine kinase;^Eukaryota; Metazoa; Chordata; Craniata; Vertebrata; Euteleostomi; Mammalia; Eutheria; Euarchontoglires; Primates; Haplorrhini; Catarrhini; Hominidae; Homo	Gene.73467::c30403_g1_i4::g.73467::m.73467	1718-321[-]	PF14520.3^HHH_5^Helix-hairpin-helix domain^130-166^E:0.0014`PF01712.16^dNK^Deoxynucleoside kinase^219-451^E:1.2e-49	COG1428^Deoxynucleoside kinase	KEGG:hsa:1633`KO:K00893	GO:0005829^cellular_component^cytosol`GO:0005634^cellular_component^nucleus`GO:0005524^molecular_function^ATP binding`GO:0004137^molecular_function^deoxycytidine kinase activity`GO:0008144^molecular_function^drug binding`GO:0019206^molecular_function^nucleoside kinase activity`GO:0042803^molecular_function^protein homodimerization activity`GO:0009157^biological_process^deoxyribonucleoside monopho…	.
c30979_g3_i10	5.94251	6.89845e-05	0.0242343	c30979_g3	RH13_ARATH^RH13_ARATH^Q:10-459,H:8-488^55.622%ID^E:1.18e-155^RecName: Full=DEAD-box ATP-dependent RNA helicase 13;^Eukaryota; Viridiplantae; Streptophyta; Embryophyta; Tracheophyta; Spermatophyta; Magnoliophyta; eudicotyledons; Gunneridae; Pentapetalae; rosids; malvids; Brassicales; Brassicaceae; Camelineae; Arabidopsis	Gene.80301::c30979_g3_i10::g.80301::m.80301	72-1448[+]	PF00270.26^DEAD^DEAD/DEAH box helicase^187-395^E:1.5e-42`PF04851.12^ResIII^Type III restriction enzyme, res subunit^197-350^E:8.3e-05	ENOG410XS03^atp-dependent rna helicase	KEGG:ath:AT3G16840`KO:K14805	GO:0005524^molecular_function^ATP binding`GO:0004386^molecular_function^helicase activity`GO:0003723^molecular_function^RNA binding	GO:0003676^molecular_function^nucleic acid binding`GO:0005524^molecular_function^ATP binding`GO:0003677^molecular_function^DNA binding`GO:0016787^molecular_function^hydrolase activity
c28773_g1_i12	5.8027	9.65387e-11	1.86528e-07	c28773_g1	CDKA2_ORYSJ^CDKA2_ORYSJ^Q:39-318,H:9-289^32.99%ID^E:5.15e-44^RecName: Full=Cyclin-dependent kinase A-2;^Eukaryota; Viridiplantae; Streptophyta; Embryophyta; Tracheophyta; Spermatophyta; Magnoliophyta; Liliopsida; Poales; Poaceae; BOP clade; Oryzoideae; Oryzeae; Oryzinae; Oryza	Gene.55929::c28773_g1_i12::g.55929::m.55929	429-1385[+]	PF00069.22^Pkinase^Protein kinase domain^46-315^E:8.4e-37`PF07714.14^Pkinase_Tyr^Protein tyrosine kinase^48-227^E:8.1e-12	ENOG410XPP3^Cyclin-Dependent Kinase	KEGG:osa:4328135`KO:K02206	GO:0005524^molecular_function^ATP binding`GO:0004693^molecular_function^cyclin-dependent protein serine/threonine kinase activity`GO:0008353^molecular_function^RNA polymerase II carboxy-terminal domain kinase activity	GO:0004672^molecular_function^protein kinase activity`GO:0005524^molecular_function^ATP binding`GO:0006468^biological_process^protein phosphorylation
c30055_g2_i8	5.76313	7.72605e-11	1.5525e-07	c30055_g2	LEAD8_DAUCA^LEAD8_DAUCA^Q:23-354,H:27-394^43.603%ID^E:3.47e-55^RecName: Full=Embryonic protein DC-8;^Eukaryota; Viridiplantae; Streptophyta; Embryophyta; Tracheophyta; Spermatophyta; Magnoliophyta; eudicotyledons; Gunneridae; Pentapetalae; asterids; campanulids; Apiales; Apiaceae; Apioideae; Scandiceae; Daucinae; Daucus`LEAD8_DAUCA^LEAD8_DAUCA^Q:65-344,H:171-464^49.191%ID^E:3.94e-55^RecName: Full…	Gene.69559::c30055_g2_i8::g.69559::m.69559	2380-1274[-]	PF01442.15^Apolipoprotein^Apolipoprotein A1/A4/E domain^81-202^E:0.091`PF01442.15^Apolipoprotein^Apolipoprotein A1/A4/E domain^145-308^E:0.00014`PF02987.13^LEA_4^Late embryogenesis abundant protein^151-193^E:3.4e-15`PF02987.13^LEA_4^Late embryogenesis abundant protein^184-227^E:3.4e-16`PF02987.13^LEA_4^Late embryogenesis abundant protein^228-271^E:1.1e-16`PF01442.15^Apolipoprotein^Apolipoprotein …	.	.	GO:0005618^cellular_component^cell wall`GO:0005737^cellular_component^cytoplasm`GO:0005576^cellular_component^extracellular region	GO:0008289^molecular_function^lipid binding`GO:0006869^biological_process^lipid transport`GO:0042157^biological_process^lipoprotein metabolic process`GO:0005576^cellular_component^extracellular region
c19483_g1_i1	5.43567	2.3462e-09	3.46658e-06	c19483_g1	PSB3A_ARATH^PSB3A_ARATH^Q:45-248,H:1-204^91.667%ID^E:5e-143^RecName: Full=Proteasome subunit beta type-3-A;^Eukaryota; Viridiplantae; Streptophyta; Embryophyta; Tracheophyta; Spermatophyta; Magnoliophyta; eudicotyledons; Gunneridae; Pentapetalae; rosids; malvids; Brassicales; Brassicaceae; Camelineae; Arabidopsis	Gene.7195::c19483_g1_i1::g.7195::m.7195	1227-481[-]	PF00227.23^Proteasome^Proteasome subunit^51-233^E:8.9e-44	ENOG410XSC8^The proteasome is a multicatalytic proteinase complex which is characterized by its ability to cleave peptides with Arg, Phe, Tyr, Leu, and Glu adjacent to the leaving group at neutral or slightly basic pH. The proteasome has an ATP-dependent proteolytic activity (By similarity)	KEGG:ath:AT1G21720`KO:K02735	GO:0005829^cellular_component^cytosol`GO:0005634^cellular_component^nucleus`GO:0000502^cellular_component^proteasome complex`GO:0005839^cellular_component^proteasome core complex`GO:0005774^cellular_component^vacuolar membrane`GO:0004298^molecular_function^threonine-type endopeptidase activity`GO:0051603^biological_process^proteolysis involved in cellular protein catabolic process	GO:0004298^molecular_function^threonine-type endopeptidase activity`GO:0051603^biological_process^proteolysis involved in cellular protein catabolic process`GO:0005839^cellular_component^proteasome core complex
c27045_g3_i8	5.38198	8.17003e-05	0.0274535	c27045_g3	PFPA_RICCO^PFPA_RICCO^Q:1-452,H:1-452^90.708%ID^E:0^RecName: Full=Pyrophosphate--fructose 6-phosphate 1-phosphotransferase subunit alpha {ECO:0000255|HAMAP-Rule:MF_03185};^Eukaryota; Viridiplantae; Streptophyta; Embryophyta; Tracheophyta; Spermatophyta; Magnoliophyta; eudicotyledons; Gunneridae; Pentapetalae; rosids; fabids; Malpighiales; Euphorbiaceae; Acalyphoideae; Acalypheae; Ricinus	Gene.40318::c27045_g3_i8::g.40318::m.40318	448-1884[+]	PF00365.17^PFK^Phosphofructokinase^88-347^E:3.8e-27	.	.	GO:0005737^cellular_component^cytoplasm`GO:0003872^molecular_function^6-phosphofructokinase activity`GO:0005524^molecular_function^ATP binding`GO:0047334^molecular_function^diphosphate-fructose-6-phosphate 1-phosphotransferase activity`GO:0046872^molecular_function^metal ion binding	GO:0003872^molecular_function^6-phosphofructokinase activity`GO:0006096^biological_process^glycolytic process
c24958_g1_i6	5.31555	1.08764e-07	0.000103092	c24958_g1	CSN7_ARATH^CSN7_ARATH^Q:1-258,H:1-259^77.992%ID^E:7.74e-152^RecName: Full=COP9 signalosome complex subunit 7;^Eukaryota; Viridiplantae; Streptophyta; Embryophyta; Tracheophyta; Spermatophyta; Magnoliophyta; eudicotyledons; Gunneridae; Pentapetalae; rosids; malvids; Brassicales; Brassicaceae; Camelineae; Arabidopsis	Gene.26353::c24958_g1_i6::g.26353::m.26353	325-1101[+]	PF01399.24^PCI^PCI domain^79-154^E:7.7e-06	ENOG410XP7W^COP9 (constitutive photomorphogenic) homolog, subunit	KEGG:ath:AT1G02090`KO:K12180	GO:0008180^cellular_component^COP9 signalosome`GO:0005829^cellular_component^cytosol`GO:0010387^biological_process^COP9 signalosome assembly`GO:0010388^biological_process^cullin deneddylation`GO:0007275^biological_process^multicellular organism development`GO:0009585^biological_process^red, far-red light phototransduction	GO:0005515^molecular_function^protein binding
c31414_g1_i1	5.08923	3.53363e-06	0.00197239	c31414_g1	CNGC1_ARATH^CNGC1_ARATH^Q:1-327,H:276-598^31.476%ID^E:9.38e-38^RecName: Full=Cyclic nucleotide-gated ion channel 1;^Eukaryota; Viridiplantae; Streptophyta; Embryophyta; Tracheophyta; Spermatophyta; Magnoliophyta; eudicotyledons; Gunneridae; Pentapetalae; rosids; malvids; Brassicales; Brassicaceae; Camelineae; Arabidopsis	Gene.85132::c31414_g1_i1::g.85132::m.85132	1678-623[-]	.	ENOG410XPSE^Potassium voltage-gated channel, subfamily H (Eag-related), member	KEGG:ath:AT5G53130`KO:K05391	GO:0016021^cellular_component^integral component of membrane`GO:0005886^cellular_component^plasma membrane`GO:0030552^molecular_function^cAMP binding`GO:0030553^molecular_function^cGMP binding`GO:0005216^molecular_function^ion channel activity`GO:0042391^biological_process^regulation of membrane potential	.
c30055_g2_i6	5.0045	1.89718e-06	0.0012141	c30055_g2	LEAD8_DAUCA^LEAD8_DAUCA^Q:23-372,H:27-445^44.731%ID^E:4.17e-63^RecName: Full=Embryonic protein DC-8;^Eukaryota; Viridiplantae; Streptophyta; Embryophyta; Tracheophyta; Spermatophyta; Magnoliophyta; eudicotyledons; Gunneridae; Pentapetalae; asterids; campanulids; Apiales; Apiaceae; Apioideae; Scandiceae; Daucinae; Daucus`LEAD8_DAUCA^LEAD8_DAUCA^Q:65-340,H:171-464^49.515%ID^E:1.54e-53^RecName: Full…	Gene.69551::c30055_g2_i6::g.69551::m.69551	2368-1193[-]	PF01442.15^Apolipoprotein^Apolipoprotein A1/A4/E domain^83-192^E:0.4`PF02987.13^LEA_4^Late embryogenesis abundant protein^106-143^E:6.6e-08`PF01442.15^Apolipoprotein^Apolipoprotein A1/A4/E domain^175-306^E:0.0011`PF02987.13^LEA_4^Late embryogenesis abundant protein^180-223^E:1.5e-16`PF02987.13^LEA_4^Late embryogenesis abundant protein^224-267^E:1.4e-16`PF01442.15^Apolipoprotein^Apolipoprotein A1/…	.	.	GO:0005618^cellular_component^cell wall`GO:0005737^cellular_component^cytoplasm`GO:0005576^cellular_component^extracellular region	GO:0008289^molecular_function^lipid binding`GO:0006869^biological_process^lipid transport`GO:0042157^biological_process^lipoprotein metabolic process`GO:0005576^cellular_component^extracellular region
c29924_g1_i3	4.97011	1.71773e-06	0.001128	c29924_g1	.	Gene.68223::c29924_g1_i3::g.68223::m.68223	463-2[-]	.	.	.	.	.
c26919_g2_i3	4.90129	5.59816e-09	7.32819e-06	c26919_g2	RL192_ARATH^RL192_ARATH^Q:1-136,H:48-183^91.912%ID^E:8.26e-85^RecName: Full=60S ribosomal protein L19-2;^Eukaryota; Viridiplantae; Streptophyta; Embryophyta; Tracheophyta; Spermatophyta; Magnoliophyta; eudicotyledons; Gunneridae; Pentapetalae; rosids; malvids; Brassicales; Brassicaceae; Camelineae; Arabidopsis	Gene.39275::c26919_g2_i3::g.39275::m.39275	1252-806[-]	PF01280.17^Ribosomal_L19e^Ribosomal protein L19e^1-99^E:3.8e-42	COG2147^ribosomal protein L19	KEGG:ath:AT3G16780`KO:K02885	GO:0022625^cellular_component^cytosolic large ribosomal subunit`GO:0005886^cellular_component^plasma membrane`GO:0003735^molecular_function^structural constituent of ribosome`GO:0006412^biological_process^translation	GO:0003735^molecular_function^structural constituent of ribosome`GO:0006412^biological_process^translation`GO:0005622^cellular_component^intracellular`GO:0005840^cellular_component^ribosome
c29002_g3_i12	4.89616	5.5674e-05	0.0199063	c29002_g3	DTX46_ARATH^DTX46_ARATH^Q:9-307,H:262-559^69.231%ID^E:1.66e-145^RecName: Full=Protein DETOXIFICATION 46, chloroplastic {ECO:0000303|PubMed:11739388};^Eukaryota; Viridiplantae; Streptophyta; Embryophyta; Tracheophyta; Spermatophyta; Magnoliophyta; eudicotyledons; Gunneridae; Pentapetalae; rosids; malvids; Brassicales; Brassicaceae; Camelineae; Arabidopsis	Gene.58645::c29002_g3_i12::g.58645::m.58645	2432-1509[-]	.	COG0534^Mate efflux family protein	KEGG:ath:AT2G21340	GO:0009507^cellular_component^chloroplast`GO:0009941^cellular_component^chloroplast envelope`GO:0031969^cellular_component^chloroplast membrane`GO:0016021^cellular_component^integral component of membrane`GO:0015297^molecular_function^antiporter activity`GO:0015238^molecular_function^drug transmembrane transporter activity	.
c31360_g5_i3	4.86489	5.6162e-09	7.32819e-06	c31360_g5	OST1A_ARATH^OST1A_ARATH^Q:23-616,H:21-614^69.865%ID^E:0^RecName: Full=Dolichyl-diphosphooligosaccharide--protein glycosyltransferase subunit 1A;^Eukaryota; Viridiplantae; Streptophyta; Embryophyta; Tracheophyta; Spermatophyta; Magnoliophyta; eudicotyledons; Gunneridae; Pentapetalae; rosids; malvids; Brassicales; Brassicaceae; Camelineae; Arabidopsis	Gene.84461::c31360_g5_i3::g.84461::m.84461	1247-3097[+]	PF04597.11^Ribophorin_I^Ribophorin I^31-456^E:2.9e-145	ENOG410XQVZ^ribophorin I	KEGG:ath:AT1G76400`KO:K12666	GO:0005783^cellular_component^endoplasmic reticulum`GO:0005789^cellular_component^endoplasmic reticulum membrane`GO:0016021^cellular_component^integral component of membrane`GO:0016020^cellular_component^membrane`GO:0004579^molecular_function^dolichyl-diphosphooligosaccharide-protein glycotransferase activity`GO:0006486^biological_process^protein glycosylation	GO:0004579^molecular_function^dolichyl-diphosphooligosaccharide-protein glycotransferase activity`GO:0006486^biological_process^protein glycosylation`GO:0005783^cellular_component^endoplasmic reticulum`GO:0016021^cellular_component^integral component of membrane
c31569_g1_i3	4.71741	2.52186e-05	0.0105135	c31569_g1	.	.	.	.	.	.	.	.
c31304_g2_i5	4.71001	1.01858e-06	0.000746996	c31304_g2	TPSGD_VITVI^TPSGD_VITVI^Q:24-467,H:113-556^65.541%ID^E:0^RecName: Full=(-)-germacrene D synthase;^Eukaryota; Viridiplantae; Streptophyta; Embryophyta; Tracheophyta; Spermatophyta; Magnoliophyta; eudicotyledons; Gunneridae; Pentapetalae; rosids; Vitales; Vitaceae; Vitis	Gene.83810::c31304_g2_i5::g.83810::m.83810	1597-191[-]	PF01397.18^Terpene_synth^Terpene synthase, N-terminal domain^1-114^E:6.2e-41`PF03936.13^Terpene_synth_C^Terpene synthase family, metal binding domain^146-411^E:1.8e-110	ENOG410YBXH^synthase	KEGG:vvi:100232954`KO:K15803	GO:0005737^cellular_component^cytoplasm`GO:0034004^molecular_function^germacradienol synthase activity`GO:0052577^molecular_function^germacrene-D synthase activity`GO:0000287^molecular_function^magnesium ion binding`GO:0016114^biological_process^terpenoid biosynthetic process	GO:0010333^molecular_function^terpene synthase activity`GO:0016829^molecular_function^lyase activity`GO:0008152^biological_process^metabolic process`GO:0000287^molecular_function^magnesium ion binding
c22639_g1_i5	4.64	2.02361e-05	0.00868874	c22639_g1	P2A02_ARATH^P2A02_ARATH^Q:5-113,H:82-192^37.5%ID^E:2.38e-16^RecName: Full=Protein PHLOEM PROTEIN 2-LIKE A2;^Eukaryota; Viridiplantae; Streptophyta; Embryophyta; Tracheophyta; Spermatophyta; Magnoliophyta; eudicotyledons; Gunneridae; Pentapetalae; rosids; malvids; Brassicales; Brassicaceae; Camelineae; Arabidopsis	Gene.15826::c22639_g1_i5::g.15826::m.15826	649-290[-]	PF14299.3^PP2^Phloem protein 2^8-113^E:1.8e-14	ENOG41105HK^NA	.	GO:0016021^cellular_component^integral component of membrane	.
c29128_g5_i4	4.50834	2.48216e-06	0.001513	c29128_g5	RL15_XANP2^RL15_XANP2^Q:53-201,H:1-148^51.656%ID^E:7.65e-37^RecName: Full=50S ribosomal protein L15 {ECO:0000255|HAMAP-Rule:MF_01341};^Bacteria; Proteobacteria; Alphaproteobacteria; Rhizobiales; Xanthobacteraceae; Xanthobacter	Gene.59916::c29128_g5_i4::g.59916::m.59916	89-895[+]	PF00828.16^Ribosomal_L27A^Ribosomal proteins 50S-L15, 50S-L18e, 60S-L27A^78-201^E:1.3e-29	COG0200^Binds to the 23S rRNA (By similarity)	KEGG:xau:Xaut_4779`KO:K02876	GO:0015934^cellular_component^large ribosomal subunit`GO:0019843^molecular_function^rRNA binding`GO:0003735^molecular_function^structural constituent of ribosome`GO:0006412^biological_process^translation	.
c28870_g2_i1	4.50173	1.05354e-08	1.30681e-05	c28870_g2	SBP65_PEA^SBP65_PEA^Q:282-662,H:164-515^36.983%ID^E:3.02e-47^RecName: Full=Seed biotin-containing protein SBP65;^Eukaryota; Viridiplantae; Streptophyta; Embryophyta; Tracheophyta; Spermatophyta; Magnoliophyta; eudicotyledons; Gunneridae; Pentapetalae; rosids; fabids; Fabales; Fabaceae; Papilionoideae; Fabeae; Pisum	Gene.56865::c28870_g2_i1::g.56865::m.56865	132-2210[+]	.	.	.	.	.
c28887_g2_i4	4.4661	3.62147e-07	0.000300708	c28887_g2	SUI1_SALBA^SUI1_SALBA^Q:1-103,H:1-103^91.262%ID^E:2.86e-67^RecName: Full=Protein translation factor SUI1 homolog;^Eukaryota; Viridiplantae; Streptophyta; Embryophyta; Tracheophyta; Spermatophyta; Magnoliophyta; eudicotyledons; Gunneridae; Pentapetalae; rosids; fabids; Malpighiales; Salicaceae; Saliceae; Salix	Gene.57165::c28887_g2_i4::g.57165::m.57165	331-2[-]	PF01253.19^SUI1^Translation initiation factor SUI1^28-99^E:4.2e-25	.	.	GO:0003743^molecular_function^translation initiation factor activity`GO:0006417^biological_process^regulation of translation	GO:0003743^molecular_function^translation initiation factor activity`GO:0006413^biological_process^translational initiation
c26617_g1_i2	4.3373	0.000161939	0.0497563	c26617_g1	Y3028_ARATH^Y3028_ARATH^Q:1-440,H:1-440^43.333%ID^E:4.96e-117^RecName: Full=Uncharacterized acetyltransferase At3g50280;^Eukaryota; Viridiplantae; Streptophyta; Embryophyta; Tracheophyta; Spermatophyta; Magnoliophyta; eudicotyledons; Gunneridae; Pentapetalae; rosids; malvids; Brassicales; Brassicaceae; Camelineae; Arabidopsis	Gene.36787::c26617_g1_i2::g.36787::m.36787	1576-242[-]	PF02458.12^Transferase^Transferase family^6-438^E:3.8e-82	ENOG410YEZS^Transferase Family	KEGG:ath:AT3G50280	GO:0016747^molecular_function^transferase activity, transferring acyl groups other than amino-acyl groups	GO:0016747^molecular_function^transferase activity, transferring acyl groups other than amino-acyl groups
c31383_g1_i5	4.18897	4.6715e-05	0.0173463	c31383_g1	.	.	.	.	.	.	.	.
c27001_g1_i3	4.15137	3.56894e-06	0.0019811	c27001_g1	TR120_ARATH^TR120_ARATH^Q:1-1185,H:1-1183^79.582%ID^E:0^RecName: Full=Trafficking protein particle complex II-specific subunit 120 homolog {ECO:0000305};^Eukaryota; Viridiplantae; Streptophyta; Embryophyta; Tracheophyta; Spermatophyta; Magnoliophyta; eudicotyledons; Gunneridae; Pentapetalae; rosids; malvids; Brassicales; Brassicaceae; Camelineae; Arabidopsis	Gene.39914::c27001_g1_i3::g.39914::m.39914	3917-354[-]	PF08626.8^TRAPPC9-Trs120^Transport protein Trs120 or TRAPPC9, TRAPP II complex subunit^9-196^E:2.1e-19`PF08626.8^TRAPPC9-Trs120^Transport protein Trs120 or TRAPPC9, TRAPP II complex subunit^203-268^E:1.5e-10`PF08626.8^TRAPPC9-Trs120^Transport protein Trs120 or TRAPPC9, TRAPP II complex subunit^315-742^E:2.7e-35	ENOG410YEPC^trafficking protein particle complex 9	KEGG:ath:AT5G11040	GO:0005769^cellular_component^early endosome`GO:0005802^cellular_component^trans-Golgi network`GO:0000919^biological_process^cell plate assembly`GO:0000911^biological_process^cytokinesis by cell plate formation`GO:0006810^biological_process^transport	.
c31414_g1_i6	4.09083	2.66775e-06	0.00160302	c31414_g1	CNGC1_ARATH^CNGC1_ARATH^Q:1-325,H:276-598^32.312%ID^E:1.59e-37^RecName: Full=Cyclic nucleotide-gated ion channel 1;^Eukaryota; Viridiplantae; Streptophyta; Embryophyta; Tracheophyta; Spermatophyta; Magnoliophyta; eudicotyledons; Gunneridae; Pentapetalae; rosids; malvids; Brassicales; Brassicaceae; Camelineae; Arabidopsis	Gene.85145::c31414_g1_i6::g.85145::m.85145	1856-795[-]	.	ENOG410XPSE^Potassium voltage-gated channel, subfamily H (Eag-related), member	KEGG:ath:AT5G53130`KO:K05391	GO:0016021^cellular_component^integral component of membrane`GO:0005886^cellular_component^plasma membrane`GO:0030552^molecular_function^cAMP binding`GO:0030553^molecular_function^cGMP binding`GO:0005216^molecular_function^ion channel activity`GO:0042391^biological_process^regulation of membrane potential	.
c29788_g1_i1	3.91516	9.36304e-05	0.0307426	c29788_g1	ARGE_ARATH^ARGE_ARATH^Q:2-228,H:4-231^75.877%ID^E:1.36e-122^RecName: Full=Acetylornithine deacetylase;^Eukaryota; Viridiplantae; Streptophyta; Embryophyta; Tracheophyta; Spermatophyta; Magnoliophyta; eudicotyledons; Gunneridae; Pentapetalae; rosids; malvids; Brassicales; Brassicaceae; Camelineae; Arabidopsis	Gene.66778::c29788_g1_i1::g.66778::m.66778	2111-1377[-]	PF01546.25^Peptidase_M20^Peptidase family M20/M25/M40^94-185^E:2.4e-19	COG0624^succinyl-diaminopimelate desuccinylase activity	.	GO:0008777^molecular_function^acetylornithine deacetylase activity`GO:0046872^molecular_function^metal ion binding`GO:0006526^biological_process^arginine biosynthetic process	GO:0016787^molecular_function^hydrolase activity`GO:0008152^biological_process^metabolic process
c25245_g2_i3	3.88166	1.88105e-05	0.00814624	c25245_g2	R47BP_ARATH^R47BP_ARATH^Q:32-442,H:12-422^72.662%ID^E:0^RecName: Full=Polyadenylate-binding protein RBP47B';^Eukaryota; Viridiplantae; Streptophyta; Embryophyta; Tracheophyta; Spermatophyta; Magnoliophyta; eudicotyledons; Gunneridae; Pentapetalae; rosids; malvids; Brassicales; Brassicaceae; Camelineae; Arabidopsis	Gene.27994::c25245_g2_i3::g.27994::m.27994	1746-415[-]	PF00076.19^RRM_1^RNA recognition motif. (a.k.a. RRM, RBD, or RNP domain)^46-114^E:3.1e-14`PF00076.19^RRM_1^RNA recognition motif. (a.k.a. RRM, RBD, or RNP domain)^139-204^E:1.8e-15`PF00076.19^RRM_1^RNA recognition motif. (a.k.a. RRM, RBD, or RNP domain)^256-319^E:2.4e-17`PF13893.3^RRM_5^RNA recognition motif. (a.k.a. RRM, RBD, or RNP domain)^257-329^E:0.075	COG0724^Rna-binding protein	KEGG:ath:AT5G19350	GO:0010494^cellular_component^cytoplasmic stress granule`GO:0005634^cellular_component^nucleus`GO:0000166^molecular_function^nucleotide binding`GO:0008143^molecular_function^poly(A) binding`GO:0034605^biological_process^cellular response to heat`GO:0006397^biological_process^mRNA processing	GO:0003676^molecular_function^nucleic acid binding
c24209_g1_i2	3.77864	4.57863e-06	0.00250013	c24209_g1	DHLE_RAPSA^DHLE_RAPSA^Q:1-38,H:1-38^78.947%ID^E:1.5e-14^RecName: Full=Late embryogenesis abundant protein;^Eukaryota; Viridiplantae; Streptophyta; Embryophyta; Tracheophyta; Spermatophyta; Magnoliophyta; eudicotyledons; Gunneridae; Pentapetalae; rosids; malvids; Brassicales; Brassicaceae; Brassiceae; Raphanus	Gene.22429::c24209_g1_i2::g.22429::m.22429	162-551[+]	PF00257.16^Dehydrin^Dehydrin^22-117^E:1.3e-11	.	.	GO:0006950^biological_process^response to stress`GO:0009415^biological_process^response to water	GO:0006950^biological_process^response to stress`GO:0009415^biological_process^response to water
c29592_g4_i8	3.77069	9.19332e-05	0.0302843	c29592_g4	SUVH4_ARATH^SUVH4_ARATH^Q:10-675,H:13-624^57.755%ID^E:0^RecName: Full=Histone-lysine N-methyltransferase, H3 lysine-9 specific SUVH4;^Eukaryota; Viridiplantae; Streptophyta; Embryophyta; Tracheophyta; Spermatophyta; Magnoliophyta; eudicotyledons; Gunneridae; Pentapetalae; rosids; malvids; Brassicales; Brassicaceae; Camelineae; Arabidopsis	Gene.64829::c29592_g4_i8::g.64829::m.64829	454-2481[+]	PF02182.14^SAD_SRA^SAD/SRA domain^196-354^E:5.1e-47`PF05033.13^Pre-SET^Pre-SET motif^385-485^E:5.9e-18`PF00856.25^SET^SET domain^504-644^E:7.3e-18	COG2940^Histone-lysine N-methyltransferase`COG3440^ubiquitin-like with PHD and ring finger domains 2, E3 ubiquitin protein ligase	KEGG:ath:AT5G13960`KO:K11420	GO:0000775^cellular_component^chromosome, centromeric region`GO:0005634^cellular_component^nucleus`GO:0010385^molecular_function^double-stranded methylated DNA binding`GO:0046974^molecular_function^histone methyltransferase activity (H3-K9 specific)`GO:0008327^molecular_function^methyl-CpG binding`GO:0010428^molecular_function^methyl-CpNpG binding`GO:0010429^molecular_function^methyl-CpNpN bindin…	GO:0042393^molecular_function^histone binding`GO:0008270^molecular_function^zinc ion binding`GO:0018024^molecular_function^histone-lysine N-methyltransferase activity`GO:0034968^biological_process^histone lysine methylation`GO:0005634^cellular_component^nucleus`GO:0005515^molecular_function^protein binding
c25628_g1_i2	3.63539	0.000140745	0.0436448	c25628_g1	UGPI4_ARATH^UGPI4_ARATH^Q:20-165,H:21-166^69.863%ID^E:3.04e-73^RecName: Full=Uncharacterized GPI-anchored protein At3g06035;^Eukaryota; Viridiplantae; Streptophyta; Embryophyta; Tracheophyta; Spermatophyta; Magnoliophyta; eudicotyledons; Gunneridae; Pentapetalae; rosids; malvids; Brassicales; Brassicaceae; Camelineae; Arabidopsis	Gene.30226::c25628_g1_i2::g.30226::m.30226	159-737[+]	.	ENOG410YJI0^(GPI)-anchored protein	KEGG:ath:AT3G06035	GO:0031225^cellular_component^anchored component of membrane`GO:0005886^cellular_component^plasma membrane	.
c30343_g2_i1	3.51261	2.23825e-05	0.0094488	c30343_g2	NOMO3_HUMAN^NOMO3_HUMAN^Q:2-768,H:343-1121^29.218%ID^E:4.5e-94^RecName: Full=Nodal modulator 3;^Eukaryota; Metazoa; Chordata; Craniata; Vertebrata; Euteleostomi; Mammalia; Eutheria; Euarchontoglires; Primates; Haplorrhini; Catarrhini; Hominidae; Homo	Gene.72780::c30343_g2_i1::g.72780::m.72780	3154-566[-]	PF13620.3^CarboxypepD_reg^Carboxypeptidase regulatory-like domain^611-685^E:5.7e-08	ENOG410XTI0^nodal modulator	KEGG:hsa:408050	GO:0016021^cellular_component^integral component of membrane`GO:0030246^molecular_function^carbohydrate binding	.
c28388_g3_i6	3.47413	7.70834e-05	0.0264325	c28388_g3	TIC40_PEA^TIC40_PEA^Q:1-427,H:1-436^62%ID^E:0^RecName: Full=Protein TIC 40, chloroplastic;^Eukaryota; Viridiplantae; Streptophyta; Embryophyta; Tracheophyta; Spermatophyta; Magnoliophyta; eudicotyledons; Gunneridae; Pentapetalae; rosids; fabids; Fabales; Fabaceae; Papilionoideae; Fabeae; Pisum	Gene.51852::c28388_g3_i6::g.51852::m.51852	160-1443[+]	.	.	.	GO:0009706^cellular_component^chloroplast inner membrane`GO:0016021^cellular_component^integral component of membrane`GO:0015031^biological_process^protein transport	.
c26866_g2_i1	3.43306	2.57682e-05	0.0106543	c26866_g2	PMT2_ARATH^PMT2_ARATH^Q:1-608,H:1-615^81.463%ID^E:0^RecName: Full=Probable methyltransferase PMT2;^Eukaryota; Viridiplantae; Streptophyta; Embryophyta; Tracheophyta; Spermatophyta; Magnoliophyta; eudicotyledons; Gunneridae; Pentapetalae; rosids; malvids; Brassicales; Brassicaceae; Camelineae; Arabidopsis	Gene.38793::c26866_g2_i1::g.38793::m.38793	2389-554[-]	PF03141.13^Methyltransf_29^Putative S-adenosyl-L-methionine-dependent methyltransferase^94-598^E:2.3e-233`PF08241.9^Methyltransf_11^Methyltransferase domain^211-305^E:4.4e-05	ENOG410YD4N^Methyltransferase	KEGG:ath:AT1G26850	GO:0005768^cellular_component^endosome`GO:0005794^cellular_component^Golgi apparatus`GO:0000139^cellular_component^Golgi membrane`GO:0016021^cellular_component^integral component of membrane`GO:0016020^cellular_component^membrane`GO:0005802^cellular_component^trans-Golgi network`GO:0008168^molecular_function^methyltransferase activity	GO:0008168^molecular_function^methyltransferase activity`GO:0008152^biological_process^metabolic process
c30055_g2_i5	3.42051	1.26237e-05	0.00580569	c30055_g2	LEAD8_DAUCA^LEAD8_DAUCA^Q:65-493,H:171-555^45.455%ID^E:1.73e-80^RecName: Full=Embryonic protein DC-8;^Eukaryota; Viridiplantae; Streptophyta; Embryophyta; Tracheophyta; Spermatophyta; Magnoliophyta; eudicotyledons; Gunneridae; Pentapetalae; asterids; campanulids; Apiales; Apiaceae; Apioideae; Scandiceae; Daucinae; Daucus	Gene.69547::c30055_g2_i5::g.69547::m.69547	2281-800[-]	PF01442.15^Apolipoprotein^Apolipoprotein A1/A4/E domain^80-199^E:0.34`PF02987.13^LEA_4^Late embryogenesis abundant protein^106-143^E:6.6e-08`PF01442.15^Apolipoprotein^Apolipoprotein A1/A4/E domain^148-338^E:0.024`PF02987.13^LEA_4^Late embryogenesis abundant protein^151-194^E:2.9e-15`PF02987.13^LEA_4^Late embryogenesis abundant protein^184-227^E:4.9e-16`PF02987.13^LEA_4^Late embryogenesis abundant…	.	.	GO:0005618^cellular_component^cell wall`GO:0005737^cellular_component^cytoplasm`GO:0005576^cellular_component^extracellular region	GO:0008289^molecular_function^lipid binding`GO:0006869^biological_process^lipid transport`GO:0042157^biological_process^lipoprotein metabolic process`GO:0005576^cellular_component^extracellular region
c28411_g2_i7	3.28121	9.51436e-05	0.0311377	c28411_g2	RBM25_MOUSE^RBM25_MOUSE^Q:672-775,H:734-837^45.192%ID^E:1.34e-24^RecName: Full=RNA-binding protein 25;^Eukaryota; Metazoa; Chordata; Craniata; Vertebrata; Euteleostomi; Mammalia; Eutheria; Euarchontoglires; Glires; Rodentia; Sciurognathi; Muroidea; Muridae; Murinae; Mus; Mus	Gene.52070::c28411_g2_i7::g.52070::m.52070	1885-4227[+]	PF00076.19^RRM_1^RNA recognition motif. (a.k.a. RRM, RBD, or RNP domain)^57-126^E:1.8e-08`PF01480.14^PWI^PWI domain^703-766^E:7.7e-14	ENOG410ZRGA^RNA binding motif protein 25	KEGG:mmu:67039`KO:K12822	GO:0005737^cellular_component^cytoplasm`GO:0016607^cellular_component^nuclear speck`GO:0005681^cellular_component^spliceosomal complex`GO:0003729^molecular_function^mRNA binding`GO:0000166^molecular_function^nucleotide binding`GO:0006915^biological_process^apoptotic process`GO:0006397^biological_process^mRNA processing`GO:0000381^biological_process^regulation of alternative mRNA splicing, via spl…	GO:0003676^molecular_function^nucleic acid binding`GO:0006397^biological_process^mRNA processing
c28036_g1_i2	3.27521	0.000105696	0.0341464	c28036_g1	AEE7_ARATH^AEE7_ARATH^Q:6-566,H:8-569^78.826%ID^E:0^RecName: Full=Acetate/butyrate--CoA ligase AAE7, peroxisomal;^Eukaryota; Viridiplantae; Streptophyta; Embryophyta; Tracheophyta; Spermatophyta; Magnoliophyta; eudicotyledons; Gunneridae; Pentapetalae; rosids; malvids; Brassicales; Brassicaceae; Camelineae; Arabidopsis	Gene.48622::c28036_g1_i2::g.48622::m.48622	157-1857[+]	PF00501.25^AMP-binding^AMP-binding enzyme^27-458^E:5.8e-81`PF13193.3^AMP-binding_C^AMP-binding enzyme C-terminal domain^467-545^E:2.8e-20	COG0318^Amp-dependent synthetase and ligase	KEGG:ath:AT3G16910	GO:0005777^cellular_component^peroxisome`GO:0003987^molecular_function^acetate-CoA ligase activity`GO:0047760^molecular_function^butyrate-CoA ligase activity`GO:0006083^biological_process^acetate metabolic process`GO:0019605^biological_process^butyrate metabolic process`GO:0006097^biological_process^glyoxylate cycle	GO:0003824^molecular_function^catalytic activity`GO:0008152^biological_process^metabolic process
c30020_g1_i5	3.21842	8.03773e-05	0.0272827	c30020_g1	ZTP50_ARATH^ZTP50_ARATH^Q:20-596,H:46-619^77.855%ID^E:0^RecName: Full=Putative zinc transporter At3g08650;^Eukaryota; Viridiplantae; Streptophyta; Embryophyta; Tracheophyta; Spermatophyta; Magnoliophyta; eudicotyledons; Gunneridae; Pentapetalae; rosids; malvids; Brassicales; Brassicaceae; Camelineae; Arabidopsis	Gene.69226::c30020_g1_i5::g.69226::m.69226	468-2258[+]	PF02535.19^Zip^ZIP Zinc transporter^173-298^E:3.3e-11	COG0428^zinc transporter	KEGG:ath:AT3G08650	GO:0016021^cellular_component^integral component of membrane`GO:0046873^molecular_function^metal ion transmembrane transporter activity`GO:0006829^biological_process^zinc II ion transport	GO:0046873^molecular_function^metal ion transmembrane transporter activity`GO:0030001^biological_process^metal ion transport`GO:0055085^biological_process^transmembrane transport`GO:0016020^cellular_component^membrane
c25902_g2_i1	3.20636	5.80203e-05	0.0205986	c25902_g2	ISPD_MENPI^ISPD_MENPI^Q:6-257,H:5-255^58.333%ID^E:4.18e-98^RecName: Full=(-)-isopiperitenol/(-)-carveol dehydrogenase, mitochondrial;^Eukaryota; Viridiplantae; Streptophyta; Embryophyta; Tracheophyta; Spermatophyta; Magnoliophyta; eudicotyledons; Gunneridae; Pentapetalae; asterids; lamiids; Lamiales; Lamiaceae; Nepetoideae; Mentheae; Mentha	Gene.31793::c25902_g2_i1::g.31793::m.31793	192-980[+]	PF00106.22^adh_short^short chain dehydrogenase^11-198^E:1.9e-47`PF08659.7^KR^KR domain^14-174^E:3.6e-13`PF13561.3^adh_short_C2^Enoyl-(Acyl carrier protein) reductase^17-257^E:1.9e-62	.	KEGG:ag:AAU20370`KO:K15090	GO:0005739^cellular_component^mitochondrion`GO:0018459^molecular_function^carveol dehydrogenase activity`GO:0018458^molecular_function^isopiperitenol dehydrogenase activity`GO:0000166^molecular_function^nucleotide binding`GO:0031525^biological_process^menthol biosynthetic process	.
c31016_g1_i1	3.19577	2.89313e-05	0.0118162	c31016_g1	.	Gene.80600::c31016_g1_i1::g.80600::m.80600	1536-427[-]	PF04862.9^DUF642^Protein of unknown function (DUF642)^21-182^E:3.9e-69`PF04862.9^DUF642^Protein of unknown function (DUF642)^193-359^E:4.3e-20	.	.	.	.
c31618_g2_i4	-2.9101	7.85345e-05	0.0268385	c31618_g2	.	Gene.86995::c31618_g2_i4::g.86995::m.86995	1693-1208[-]	.	.	.	.	.
c22644_g1_i2	-2.9849	7.21126e-05	0.0249838	c22644_g1	.	.	.	.	.	.	.	.
c20626_g1_i1	-3.19365	2.06044e-05	0.0088092	c20626_g1	ERLI1_ARATH^ERLI1_ARATH^Q:1-148,H:1-168^50.595%ID^E:2.74e-45^RecName: Full=Lipid transfer protein EARLI 1;^Eukaryota; Viridiplantae; Streptophyta; Embryophyta; Tracheophyta; Spermatophyta; Magnoliophyta; eudicotyledons; Gunneridae; Pentapetalae; rosids; malvids; Brassicales; Brassicaceae; Camelineae; Arabidopsis	Gene.9562::c20626_g1_i1::g.9562::m.9562	696-250[-]	PF14547.3^Hydrophob_seed^Hydrophobic seed protein^65-148^E:2.7e-29`PF00234.19^Tryp_alpha_amyl^Protease inhibitor/seed storage/LTP family^71-147^E:4.2e-07	ENOG410YRRT^14 kDa proline-rich protein	KEGG:ath:AT4G12480	GO:0005576^cellular_component^extracellular region`GO:0009505^cellular_component^plant-type cell wall`GO:0050832^biological_process^defense response to fungus`GO:0009737^biological_process^response to abscisic acid`GO:0009409^biological_process^response to cold`GO:0009651^biological_process^response to salt stress	.
c635_g1_i1	-3.28011	4.18563e-05	0.0157505	c635_g1	ERLL2_ARATH^ERLL2_ARATH^Q:37-123,H:93-181^58.889%ID^E:7.26e-27^RecName: Full=pEARLI1-like lipid transfer protein 2;^Eukaryota; Viridiplantae; Streptophyta; Embryophyta; Tracheophyta; Spermatophyta; Magnoliophyta; eudicotyledons; Gunneridae; Pentapetalae; rosids; malvids; Brassicales; Brassicaceae; Camelineae; Arabidopsis	Gene.83::c635_g1_i1::g.83::m.83	683-306[-]	PF14547.3^Hydrophob_seed^Hydrophobic seed protein^43-124^E:2.8e-25`PF00234.19^Tryp_alpha_amyl^Protease inhibitor/seed storage/LTP family^67-123^E:5.9e-05	ENOG410YRRT^14 kDa proline-rich protein	KEGG:ath:AT4G12490	GO:0005618^cellular_component^cell wall`GO:0005576^cellular_component^extracellular region`GO:0050832^biological_process^defense response to fungus	.
c28290_g1_i7	-3.28984	5.85452e-05	0.0207118	c28290_g1	R10A3_ARATH^R10A3_ARATH^Q:1-194,H:8-201^92.268%ID^E:1.17e-116^RecName: Full=60S ribosomal protein L10a-3;^Eukaryota; Viridiplantae; Streptophyta; Embryophyta; Tracheophyta; Spermatophyta; Magnoliophyta; eudicotyledons; Gunneridae; Pentapetalae; rosids; malvids; Brassicales; Brassicaceae; Camelineae; Arabidopsis	Gene.50970::c28290_g1_i7::g.50970::m.50970	3-590[+]	PF00687.18^Ribosomal_L1^Ribosomal protein L1p/L10e family^14-194^E:8.4e-40	COG0081^Binds directly to 23S rRNA. The L1 stalk is quite mobile in the ribosome, and is involved in E site tRNA release (By similarity)	KEGG:ath:AT5G22440`KO:K02865	GO:0022625^cellular_component^cytosolic large ribosomal subunit`GO:0022626^cellular_component^cytosolic ribosome`GO:0005730^cellular_component^nucleolus`GO:0003723^molecular_function^RNA binding`GO:0003735^molecular_function^structural constituent of ribosome`GO:0006412^biological_process^translation	.
c30702_g1_i4	-3.35134	2.16001e-05	0.00919581	c30702_g1	ALAT2_ARATH^ALAT2_ARATH^Q:1-530,H:1-540^80%ID^E:0^RecName: Full=Alanine aminotransferase 2, mitochondrial;^Eukaryota; Viridiplantae; Streptophyta; Embryophyta; Tracheophyta; Spermatophyta; Magnoliophyta; eudicotyledons; Gunneridae; Pentapetalae; rosids; malvids; Brassicales; Brassicaceae; Camelineae; Arabidopsis	Gene.76930::c30702_g1_i4::g.76930::m.76930	1733-141[-]	PF00155.18^Aminotran_1_2^Aminotransferase class I and II^155-503^E:8.2e-39	COG0436^aminotransferase	KEGG:ath:AT1G72330`KO:K00814	GO:0005739^cellular_component^mitochondrion`GO:0004021^molecular_function^L-alanine:2-oxoglutarate aminotransferase activity`GO:0030170^molecular_function^pyridoxal phosphate binding`GO:0009058^biological_process^biosynthetic process`GO:0042853^biological_process^L-alanine catabolic process`GO:0001666^biological_process^response to hypoxia	GO:0030170^molecular_function^pyridoxal phosphate binding`GO:0009058^biological_process^biosynthetic process
c29216_g2_i3	-3.39586	1.02992e-05	0.00492755	c29216_g2	.	Gene.60904::c29216_g2_i3::g.60904::m.60904	845-1279[+]	.	.	.	.	.
c30095_g2_i16	-3.45635	7.55331e-06	0.00385227	c30095_g2	.	Gene.70077::c30095_g2_i16::g.70077::m.70077	711-214[-]	.	.	.	.	.
c23886_g1_i1	-3.5009	1.3025e-05	0.00592147	c23886_g1	AGP14_ARATH^AGP14_ARATH^Q:39-100,H:1-60^54.839%ID^E:3.21e-16^RecName: Full=Arabinogalactan peptide 14;^Eukaryota; Viridiplantae; Streptophyta; Embryophyta; Tracheophyta; Spermatophyta; Magnoliophyta; eudicotyledons; Gunneridae; Pentapetalae; rosids; malvids; Brassicales; Brassicaceae; Camelineae; Arabidopsis	Gene.20879::c23886_g1_i1::g.20879::m.20879	750-448[-]	.	ENOG4111CA2^NA	KEGG:ath:AT5G56540	GO:0031225^cellular_component^anchored component of membrane`GO:0005886^cellular_component^plasma membrane`GO:0048767^biological_process^root hair elongation	.
c30783_g1_i4	-3.58964	9.99149e-06	0.00482627	c30783_g1	MDHM_CITLA^MDHM_CITLA^Q:1-230,H:118-347^92.174%ID^E:2.79e-153^RecName: Full=Malate dehydrogenase, mitochondrial;^Eukaryota; Viridiplantae; Streptophyta; Embryophyta; Tracheophyta; Spermatophyta; Magnoliophyta; eudicotyledons; Gunneridae; Pentapetalae; rosids; fabids; Cucurbitales; Cucurbitaceae; Benincaseae; Citrullus	Gene.77795::c30783_g1_i4::g.77795::m.77795	209-901[+]	PF00056.20^Ldh_1_N^lactate/malate dehydrogenase, NAD binding domain^1-61^E:7.2e-17`PF02866.15^Ldh_1_C^lactate/malate dehydrogenase, alpha/beta C-terminal domain^63-226^E:2.7e-52	.	.	GO:0005759^cellular_component^mitochondrial matrix`GO:0030060^molecular_function^L-malate dehydrogenase activity`GO:0005975^biological_process^carbohydrate metabolic process`GO:0006108^biological_process^malate metabolic process`GO:0006099^biological_process^tricarboxylic acid cycle	GO:0016491^molecular_function^oxidoreductase activity`GO:0055114^biological_process^oxidation-reduction process`GO:0016616^molecular_function^oxidoreductase activity, acting on the CH-OH group of donors, NAD or NADP as acceptor
c26236_g2_i1	-3.60823	1.26547e-05	0.00580569	c26236_g2	.	Gene.33981::c26236_g2_i1::g.33981::m.33981	1420-566[-]	.	.	.	.	.
c28231_g1_i2	-3.64784	4.65474e-06	0.00252795	c28231_g1	SDC1_ARATH^SDC1_ARATH^Q:16-490,H:21-482^81.053%ID^E:0^RecName: Full=Serine decarboxylase;^Eukaryota; Viridiplantae; Streptophyta; Embryophyta; Tracheophyta; Spermatophyta; Magnoliophyta; eudicotyledons; Gunneridae; Pentapetalae; rosids; malvids; Brassicales; Brassicaceae; Camelineae; Arabidopsis	Gene.50434::c28231_g1_i2::g.50434::m.50434	1632-160[-]	PF00282.16^Pyridoxal_deC^Pyridoxal-dependent decarboxylase conserved domain^200-413^E:9.5e-24	COG0076^decarboxylase	KEGG:ath:AT1G43710`KO:K01590	GO:0005829^cellular_component^cytosol`GO:0005886^cellular_component^plasma membrane`GO:0016831^molecular_function^carboxy-lyase activity`GO:0030170^molecular_function^pyridoxal phosphate binding`GO:0019752^biological_process^carboxylic acid metabolic process`GO:0006580^biological_process^ethanolamine metabolic process	GO:0016831^molecular_function^carboxy-lyase activity`GO:0030170^molecular_function^pyridoxal phosphate binding`GO:0019752^biological_process^carboxylic acid metabolic process
[truncated: 266 more rows]
