# Supplementary material for: Comparative Seeds Storage Transcriptome Analysis of Astronium fraxinifolium Schott, a Threatened Tree Species from Brazil
Source: Int J Mol Sci. 2022 Nov 10;23(22):13852. doi: 10.3390/ijms232213852 (PMC9696909; doi:10.3390/ijms232213852)
Supplement: Supplementary file 1 [file ijms-23-13852-s001.zip › Supplemental table S2.pdf]

**Table S2.** Common genes identified between artificially aged seeds of GOIAS and MINAS treatments.

|                                                 | Transcript ID | Uniprot/SwissProt ID | Protein names                                                                                                                                                                                        |
|-------------------------------------------------|---------------|----------------------|------------------------------------------------------------------------------------------------------------------------------------------------------------------------------------------------------|
| <b>up-regulated<br/>common<br/>genes</b>        | c31142_g1_i6  | AB26B_ARATH          | ABC transporter B family member 26, chloroplastic (ABC transporter ABCB.26) (AtABCB26) (Antigen peptide transporter-like 1) (Transporter associated with antigen processing-like protein 1) (AtTAP1) |
|                                                 | c29015_g2_i10 | MYO15_ARATH          | Myosin-15 (Myosin XI I) (AtXI-I)                                                                                                                                                                     |
| <b>down-<br/>regulated<br/>common<br/>genes</b> | c26084_g1_i2  | KC1D_ARATH           | Casein kinase 1-like protein 1 (EC 2.7.11.1) (Casein kinase 1)                                                                                                                                       |
|                                                 | c28984_g1_i3  | HSDD1_ARATH          | 3beta-hydroxysteroid-dehydrogenase/decarboxylase isoform 1 (At3BETAHSD/D1) (EC 1.1.1.418)                                                                                                            |
|                                                 | c29489_g1_i2  | FRS5_ARATH           | Protein FAR1-RELATED SEQUENCE 5                                                                                                                                                                      |
|                                                 | c27880_g2_i1  | M030_ARATH           | Uncharacterized mitochondrial protein AtMg00030 (ORF107a)                                                                                                                                            |
|                                                 | c31473_g3_i2  | -                    | no BLAST results/Uncharacterized protein                                                                                                                                                             |
|                                                 | c20285_g1_i1  | -                    | no BLAST results/Uncharacterized protein                                                                                                                                                             |
|                                                 | c20285_g2_i1  | -                    | no BLAST results/Uncharacterized protein                                                                                                                                                             |
|                                                 | c20285_g1_i3  | -                    | no BLAST results/Uncharacterized protein                                                                                                                                                             |
|                                                 | c15514_g1_i1  | -                    | no BLAST results/Uncharacterized protein                                                                                                                                                             |
