# Supplementary material for: Comparative Seeds Storage Transcriptome Analysis of Astronium fraxinifolium Schott, a Threatened Tree Species from Brazil
Source: Int J Mol Sci. 2022 Nov 10;23(22):13852. doi: 10.3390/ijms232213852 (PMC9696909; doi:10.3390/ijms232213852)
Supplement: Supplementary file 1 [file ijms-23-13852-s001.zip › Supplemental table S3.pdf]

**Table S3.** Gene Ontology (GO) enrichment analysis of DEGs that were up and down expressed in the comparison of GOIAS control vs GOIAS aged-seeds.

| <b>GOIAS control vs GOIAS aged-seeds up-regulated genes</b>   |               |                      |                        |                                                         |
|---------------------------------------------------------------|---------------|----------------------|------------------------|---------------------------------------------------------|
| <b>Enrichment FDR</b>                                         | <b>nGenes</b> | <b>Pathway Genes</b> | <b>Fold Enrichment</b> | <b>Pathway</b>                                          |
| <b>0.000317</b>                                               | 3             | 9                    | 88.55128               | Negative regulation of gene silencing                   |
| <b>6.70E-05</b>                                               | 6             | 70                   | 22.77033               | Trichome morphogenesis                                  |
| <b>0.000292</b>                                               | 5             | 60                   | 22.13782               | Negative regulation of gene expression, epigenetic      |
| <b>0.000158</b>                                               | 6             | 90                   | 17.71026               | Trichome differentiation                                |
| <b>0.000222</b>                                               | 6             | 100                  | 15.93923               | Plant epidermis morphogenesis                           |
| <b>0.000367</b>                                               | 7             | 183                  | 10.16162               | Gene silencing                                          |
| <b>0.000367</b>                                               | 8             | 258                  | 8.237329               | Cell morphogenesis involved in differentiation          |
| <b>0.000116</b>                                               | 10            | 342                  | 7.767656               | Negative regulation of gene expression                  |
| <b>0.000317</b>                                               | 9             | 329                  | 7.267126               | Chromatin organization                                  |
| <b>0.000116</b>                                               | 11            | 423                  | 6.908256               | Cell morphogenesis                                      |
| <b>0.000397</b>                                               | 9             | 349                  | 6.850672               | Cell development                                        |
| <b>4.30E-05</b>                                               | 16            | 841                  | 5.054057               | Cellular developmental process                          |
| <b>0.000418</b>                                               | 12            | 665                  | 4.793754               | Transcription by RNA polymerase II                      |
| <b>0.000317</b>                                               | 13            | 737                  | 4.685889               | Negative regulation of macromolecule metabolic proc.    |
| <b>0.000367</b>                                               | 13            | 759                  | 4.550066               | Cell differentiation                                    |
| <b>0.000158</b>                                               | 16            | 1015                 | 4.187647               | Anatomical structure morphogenesis                      |
| <b>4.30E-05</b>                                               | 19            | 1217                 | 4.147431               | Negative regulation of biological proc.                 |
| <b>4.30E-05</b>                                               | 24            | 1845                 | 3.455666               | Organelle organization                                  |
| <b>0.000222</b>                                               | 20            | 1606                 | 3.308267               | Post-embryonic development                              |
| <b>GOIAS control vs GOIAS aged-seeds down-regulated genes</b> |               |                      |                        |                                                         |
| <b>Enrichment FDR</b>                                         | <b>nGenes</b> | <b>Pathway Genes</b> | <b>Fold Enrichment</b> | <b>Pathway</b>                                          |
| <b>0.02139</b>                                                | 4             | 86                   | 15.2979                | Regulation of gene expression, epigenetic               |
| <b>0.019264</b>                                               | 5             | 143                  | 11.50017               | RNA catabolic process                                   |
| <b>0.036112</b>                                               | 4             | 119                  | 11.05562               | mRNA catabolic process                                  |
| <b>0.026204</b>                                               | 5             | 185                  | 8.889318               | Nucleobase-containing compound catabolic proc.          |
| <b>0.019264</b>                                               | 6             | 229                  | 8.617592               | Vegetative to reproductive phase transition of meristem |
| <b>0.021436</b>                                               | 6             | 266                  | 7.418904               | Aromatic compound catabolic proc.                       |
| <b>0.022452</b>                                               | 6             | 275                  | 7.176104               | Organic cyclic compound catabolic proc.                 |
| <b>0.045518</b>                                               | 5             | 235                  | 6.997974               | Heterocycle catabolic proc.                             |
| <b>0.045518</b>                                               | 5             | 237                  | 6.938919               | Cellular nitrogen compound catabolic proc.              |
| <b>0.019264</b>                                               | 7             | 342                  | 6.731969               | Negative regulation of gene expression                  |
| <b>0.036112</b>                                               | 6             | 329                  | 5.998263               | Chromatin organization                                  |
| <b>0.036112</b>                                               | 8             | 605                  | 4.349154               | mRNA metabolic process                                  |
| <b>0.036112</b>                                               | 9             | 737                  | 4.016476               | Negative regulation of macromolecule metabolic proc.    |
| <b>0.019264</b>                                               | 13            | 1217                 | 3.513362               | Negative regulation of biological proc.                 |
| <b>0.020374</b>                                               | 13            | 1265                 | 3.380049               | Cellular response to stress                             |
