# Supplementary material for: Comparative Seeds Storage Transcriptome Analysis of Astronium fraxinifolium Schott, a Threatened Tree Species from Brazil
Source: Int J Mol Sci. 2022 Nov 10;23(22):13852. doi: 10.3390/ijms232213852 (PMC9696909; doi:10.3390/ijms232213852)
Supplement: Supplementary file 1 [file ijms-23-13852-s001.zip › Supplemental table S4.pdf]

**Table S4.** Gene Ontology (GO) enrichment analysis of DEGs that were up expressed in the comparison of MINAS control vs MINAS aged-seeds.

| <b>MINAS control vs MINAS aged-seeds up-regulated genes</b> |               |                      |                        |                                                          |
|-------------------------------------------------------------|---------------|----------------------|------------------------|----------------------------------------------------------|
| <b>Enrichment FDR</b>                                       | <b>nGenes</b> | <b>Pathway Genes</b> | <b>Fold Enrichment</b> | <b>Pathway</b>                                           |
| <b>0.042939</b>                                             | 2             | 28                   | 73.08995               | Production of miRNAs involved in gene silencing by miRNA |
| <b>0.035833</b>                                             | 3             | 104                  | 29.51709               | Negative regulation of post-embryonic development        |
| <b>0.040157</b>                                             | 3             | 124                  | 24.75627               | Negative regulation of multicellular organismal process  |
| <b>0.042939</b>                                             | 3             | 151                  | 20.32965               | Negative regulation of developmental process             |
| <b>0.000699</b>                                             | 9             | 1217                 | 7.567242               | Negative regulation of biological process                |
