# Supplementary material for: Comparative Seeds Storage Transcriptome Analysis of Astronium fraxinifolium Schott, a Threatened Tree Species from Brazil
Source: Int J Mol Sci. 2022 Nov 10;23(22):13852. doi: 10.3390/ijms232213852 (PMC9696909; doi:10.3390/ijms232213852)
Supplement: Supplementary file 1 [file ijms-23-13852-s001.zip › Supplemental table S5.pdf]

**Table S5.** Gene Ontology (GO) enrichment analysis of DEGs that were up and down expressed in the comparison of GOIAS aged-seeds vs MINAS aged-seeds.

| <b>GOIAS aged-seeds vs MINAS aged-seeds up-regulated genes</b>   |                |                      |                        |                                                    |
|------------------------------------------------------------------|----------------|----------------------|------------------------|----------------------------------------------------|
| <b>Enrichment FDR</b>                                            | <b>nGene s</b> | <b>Pathway Genes</b> | <b>Fold Enrichment</b> | <b>Pathway</b>                                     |
| <b>8.03E-05</b>                                                  | 3              | 4                    | 259.0125               | Cellular response to UV-C                          |
| <b>0.010182</b>                                                  | 2              | 8                    | 86.3375                | Transcription, RNA-templated                       |
| <b>0.00094</b>                                                   | 3              | 13                   | 79.69615               | Response to UV-C                                   |
| <b>0.002755</b>                                                  | 4              | 60                   | 23.02333               | Negative regulation of gene expression, epigenetic |
| <b>0.002755</b>                                                  | 4              | 62                   | 22.28065               | Detection of external stimulus                     |
| <b>0.000895</b>                                                  | 5              | 86                   | 20.07849               | Regulation of gene expression, epigenetic          |
| <b>0.000895</b>                                                  | 6              | 137                  | 15.12482               | Cellular response to light stimulus                |
| <b>0.000895</b>                                                  | 6              | 144                  | 14.38958               | Cellular response to radiation                     |
| <b>0.009287</b>                                                  | 4              | 97                   | 14.24124               | Phosphatidylinositol metabolic process             |
| <b>0.009287</b>                                                  | 5              | 183                  | 9.435792               | Gene silencing                                     |
| <b>0.000895</b>                                                  | 8              | 329                  | 8.397568               | Chromatin organization                             |
| <b>0.002894</b>                                                  | 9              | 564                  | 5.510904               | Chromosome organization                            |
| <b>0.007264</b>                                                  | 10             | 813                  | 4.247847               | Cellular lipid metabolic process                   |
| <b>0.009287</b>                                                  | 12             | 1217                 | 3.405259               | Negative regulation of biological process          |
| <b>0.010182</b>                                                  | 15             | 1845                 | 2.807724               | Organelle organization                             |
| <b>GOIAS aged-seeds vs MINAS aged-seeds down-regulated genes</b> |                |                      |                        |                                                    |
| <b>Enrichment FDR</b>                                            | <b>nGene s</b> | <b>Pathway Genes</b> | <b>Fold Enrichment</b> | <b>Pathway</b>                                     |
| <b>0.023395</b>                                                  | 9              | 850                  | 5.318759               | Organonitrogen compound catabolic process          |
| <b>0.023395</b>                                                  | 11             | 1422                 | 3.885795               | Cellular catabolic process                         |
| <b>0.023395</b>                                                  | 13             | 1914                 | 3.411836               | Response to external stimulus                      |
